# Supplementary material for: An improved approach for predicting drug–target interaction: proteochemometrics to molecular docking
Source: Royal Society of Chemistry journal article supplement (doi:10.1039/c5mb00650c), 2016-01-19
Supplement: c5mb00650c1.csv [file c5mb00650c1.csv]

Generic Name	TTD drug ID	pdb-HET ID	pred2D	pred3D	APP	ap_sim	dock score	redock score	redock rmsd	Uniprot ID	Entry name	Protein names	Gene names	Organism	EC number	TTD Indication	OMIM
Amrubicin hydrochloride; SM-5887	DNAP001355	1el3-I84	0.92	0.92	0.92	0.18	-9.3	-7.7	4.8	P15121	ALDR_HUMAN	Aldose reductase (AR) (EC 1.1.1.21) (Aldehyde reductase) (Aldo-keto reductase family 1 member B1)	AKR1B1 ALDR1	Homo sapiens (Human)	1.1.1.21	['rheumatoid arthritis', 'diabetic neuropathy', 'diabetes']
Amrubicin hydrochloride; SM-5887	DNAP001355	2ogz-U1N	0.9	0.92	0.91	0.13	-8.7	-8.3	1.7	P27487	DPP4_HUMAN	Dipeptidyl peptidase 4 (EC 3.4.14.5) (ADABP) (Adenosine deaminase complexing protein 2) (ADCP-2) (Dipeptidyl peptidase IV) (DPP IV) (T-cell activation antigen CD26) (TP103) (CD antigen CD26) [Cleaved into: Dipeptidyl peptidase 4 membrane form (Dipeptidyl peptidase IV membrane form); Dipeptidyl peptidase 4 soluble form (Dipeptidyl peptidase IV soluble form)]	DPP4 ADCP2 CD26	Homo sapiens (Human)	3.4.14.5	['diabetes mellitus', 'type 2 diabetes', 'diabetes mellitus type ii', 'diabetes', 'hyperglycaemia in type 2 diabetes mellitus']
Amrubicin hydrochloride; SM-5887	DNAP001355	1kvk-ATP	0.86	0.94	0.9	0.13	-8	-7.8	2.3	P17256	KIME_RAT	Mevalonate kinase (MK) (EC 2.7.1.36)	Mvk	Rattus norvegicus (Rat)	2.7.1.36	[]	DISEASE: Note=Mutation in the mevalonate kinase gene causes mevalonicaciduria.
Amrubicin hydrochloride; SM-5887	DNAP001355	3neo-G24	0.94	0.86	0.9	0.22	-5.7	-5.1	3.7	P02766	TTHY_HUMAN	Transthyretin (ATTR) (Prealbumin) (TBPA)	TTR PALB	Homo sapiens (Human)		['amyloidosis', 'ttr amyloidosis']	DISEASE: Amyloidosis, transthyretin-related (AMYL-TTR) [MIM:105210]: A hereditary generalized amyloidosis due to transthyretin amyloid deposition. Protein fibrils can form in different tissues leading to amyloid polyneuropathies, amyloidotic cardiomyopathy, carpal tunnel syndrome, systemic senile amyloidosis. The disease includes leptomeningeal amyloidosis that is characterized by primary involve…
Amrubicin hydrochloride; SM-5887	DNAP001355	2j91-AMP	0.97	0.79	0.88	0.12	-9	-7	4.4	P30566	PUR8_HUMAN	Adenylosuccinate lyase (ASL) (EC 4.3.2.2) (Adenylosuccinase) (ASase)	ADSL AMPS	Homo sapiens (Human)	4.3.2.2	[]	DISEASE: Adenylosuccinase deficiency (ADSL deficiency) [MIM:103050]: An autosomal recessive disorder characterized by the accumulation in the body fluids of succinylaminoimidazole-carboxamide riboside (SAICA-riboside) and succinyladenosine (S-Ado). Most children display marked psychomotor delay, often accompanied by epilepsy or autistic features, or both, although some patients may be less profou…
Amrubicin hydrochloride; SM-5887	DNAP001355	3eml-ZMA	0.82	0.93	0.88	0.1	-9.2	-7.9	2.5	P29274	AA2AR_HUMAN	Adenosine receptor A2a	ADORA2A ADORA2	Homo sapiens (Human)		['pharmacological stress agent for radionuclide imaging', 'fatigue and orthostatic hypotension', 'gastric diseases', 'schizophrenia', 'neuropathic pain', 'acute and chronic heart failure', "parkinson's disease", 'diabetic foot ulcers']
Amrubicin hydrochloride; SM-5887	DNAP001355	3bur-TES	0.82	0.92	0.87	0.14	-9.5	-13.6	1.1	P51857	AK1D1_HUMAN	3-oxo-5-beta-steroid 4-dehydrogenase (EC 1.3.1.3) (Aldo-keto reductase family 1 member D1) (Delta(4)-3-ketosteroid 5-beta-reductase) (Delta(4)-3-oxosteroid 5-beta-reductase)	AKR1D1 SRD5B1	Homo sapiens (Human)	1.3.1.3	[]	DISEASE: Congenital bile acid synthesis defect 2 (CBAS2) [MIM:235555]: A condition characterized by jaundice, intrahepatic cholestasis and hepatic failure. Patients with this liver disease show absence or low levels of chenodeoxycholic acid and cholic acid in plasma and urine. {ECO:0000269|PubMed:12970144, ECO:0000269|PubMed:15030995}. Note=The disease is caused by mutations affecting the gene re…
Amrubicin hydrochloride; SM-5887	DNAP001355	3hu3-ATG	0.96	0.76	0.86	0.13	-8.8	-10.3	0.4	P55072	TERA_HUMAN	Transitional endoplasmic reticulum ATPase (TER ATPase) (EC 3.6.4.6) (15S Mg(2+)-ATPase p97 subunit) (Valosin-containing protein) (VCP)	VCP	Homo sapiens (Human)	3.6.4.6	[]	DISEASE: Inclusion body myopathy with early-onset Paget disease with or without frontotemporal dementia 1 (IBMPFD1) [MIM:167320]: An autosomal dominant disease characterized by disabling muscle weakness clinically resembling to limb girdle muscular dystrophy, osteolytic bone lesions consistent with Paget disease, and premature frontotemporal dementia. Clinical features show incomplete penetrance.…
Amrubicin hydrochloride; SM-5887	DNAP001355	3ovm-MZC	0.78	0.93	0.86	0.12	-8.7	-7.5	2.7	P16083	NQO2_HUMAN	Ribosyldihydronicotinamide dehydrogenase [quinone] (EC 1.10.99.2) (NRH dehydrogenase [quinone] 2) (NRH:quinone oxidoreductase 2) (Quinone reductase 2) (QR2)	NQO2 NMOR2	Homo sapiens (Human)	1.10.99.2	['cancer/tumors']
Azacitidine	DAP000640	2q7o-IMH	0.97	0.97	0.97	0.34	-6.4	-7.2	0.7	P00491	PNPH_HUMAN	Purine nucleoside phosphorylase (PNP) (EC 2.4.2.1) (Inosine phosphorylase) (Inosine-guanosine phosphorylase)	PNP NP	Homo sapiens (Human)	2.4.2.1	['moderate to severe plaque psoriasis', 'psoriasis, cutaneous t-cell lymphoma', 'refractory cutaneous t-cell lymphoma, b cell acute lymphoblastic leukemia']	DISEASE: Purine nucleoside phosphorylase deficiency (PNPD) [MIM:613179]: A disorder that interrupts both the catabolism of inosine into hypoxanthine and guanosine into guanine, and leads to the accumulation of guanosine, inosine, and their deoxified by-products. The main clinical presentation is recurrent infections due to severe T-cell immunodeficiency. Some patients also have neurologic impairm…
Azacitidine	DAP000640	3fzh-3BH	0.99	0.92	0.96	0.52	-6.9	-7.3	0.4	P11142	HSP7C_HUMAN	Heat shock cognate 71 kDa protein (Heat shock 70 kDa protein 8) (Lipopolysaccharide-associated protein 1) (LAP-1) (LPS-associated protein 1)	HSPA8 HSC70 HSP73 HSPA10	Homo sapiens (Human)		['bacterial infection']
Azacitidine	DAP000640	3lgg-CFE	0.9	0.97	0.94	0.36	-8	-8.7	1.1	Q9NZK5	CECR1_HUMAN	Adenosine deaminase CECR1 (EC 3.5.4.4) (Cat eye syndrome critical region protein 1)	CECR1 ADA2 ADGF IDGFL	Homo sapiens (Human)	3.5.4.4	[]	DISEASE: Polyarteritis nodosa (PAN) [MIM:615688]: A systemic necrotizing vasculitis that affects medium and small arteries. The ensuing tissue ischemia can affect any organ, including the skin, musculoskeletal system, kidneys, gastrointestinal tract, and the cardiovascular and nervous systems. Organ involvement and disease severity are highly variable. Clinical features include recurrent ischemic…
Azacitidine	DAP000640	1kvk-ATP	0.88	0.97	0.93	0.23	-6.3	-7.8	2.3	P17256	KIME_RAT	Mevalonate kinase (MK) (EC 2.7.1.36)	Mvk	Rattus norvegicus (Rat)	2.7.1.36	[]	DISEASE: Note=Mutation in the mevalonate kinase gene causes mevalonicaciduria.
Azacitidine	DAP000640	2bsx-NOS	0.85	0.98	0.92	0.52	-6	-6.6	0.8	Q8T9Z7	Q8T9Z7_PLAFA	Purine nucleoside phosphorylase (EC 2.4.2.1)	PNP	Plasmodium falciparum	2.4.2.1	['moderate to severe plaque psoriasis', 'psoriasis, cutaneous t-cell lymphoma', 'refractory cutaneous t-cell lymphoma, b cell acute lymphoblastic leukemia']
Belotecan hydrochloride; Camptobell; CDK-602	DNAP001340	3pz1-3PZ	0.9	0.83	0.87	0.18	-8.2	-8.5	3.8	Q9JHK4	PGTA_MOUSE	Geranylgeranyl transferase type-2 subunit alpha (EC 2.5.1.60) (Geranylgeranyl transferase type II subunit alpha) (Rab geranyl-geranyltransferase subunit alpha) (Rab GG transferase alpha) (Rab GGTase alpha) (Rab geranylgeranyltransferase subunit alpha)	Rabggta	Mus musculus (Mouse)	2.5.1.60	[]	DISEASE: Note=Defects in Rabggta are the cause of the gunmetal (gm) phenotype. Mice homozygous for gm have prolonged bleeding, thrombocytopenia and reduced platelet alpha- and delta-granule contents. {ECO:0000269|PubMed:10737774}.
Belotecan hydrochloride; Camptobell; CDK-602	DNAP001340	3qar-QAR	0.89	0.83	0.86	0.16	-7.8	-8	0.4	P48736	PK3CG_HUMAN	Phosphatidylinositol 4,5-bisphosphate 3-kinase catalytic subunit gamma isoform (PI3-kinase subunit gamma) (PI3K-gamma) (PI3Kgamma) (PtdIns-3-kinase subunit gamma) (EC 2.7.1.153) (Phosphatidylinositol 4,5-bisphosphate 3-kinase 110 kDa catalytic subunit gamma) (PtdIns-3-kinase subunit p110-gamma) (p110gamma) (Phosphoinositide-3-kinase catalytic gamma polypeptide) (Serine/threonine protein kinase PI…	PIK3CG	Homo sapiens (Human)	2.7.1.153; 2.7.11.1	['metastatic breast cancer', 'lymphoma', 'solid tumors', "advanced solid tumours; non-hodgkin's lymphoma", 'cancer', 'advanced solid tumours; advanced breast cancer', 'myeloma (see also lymphoma)', 'metastatic solid tumors', 'thrombosis', 'advanced solid tumours; metastatic breast cancer; endometrial cancer; lymphoma', 'angioedema, myocardial infarction', 'advanced solid tumours', "advanced solid…
Belotecan hydrochloride; Camptobell; CDK-602	DNAP001340	2ok1-33A	0.88	0.83	0.86	0.2	-7.8	-9	0.7	P53779	MK10_HUMAN	Mitogen-activated protein kinase 10 (MAP kinase 10) (MAPK 10) (EC 2.7.11.24) (MAP kinase p49 3F12) (Stress-activated protein kinase 1b) (SAPK1b) (Stress-activated protein kinase JNK3) (c-Jun N-terminal kinase 3)	MAPK10 JNK3 JNK3A PRKM10 SAPK1B	Homo sapiens (Human)	2.7.11.24	[]	DISEASE: Note=A chromosomal aberration involving MAPK10 has been found in a single patient with pharmacoresistant epileptic encephalopathy. Translocation t(Y;4)(q11.2;q21) which causes MAPK10 truncation. {ECO:0000269|PubMed:16249883}.
Camptothecin; Irinotecan	DNC000385	2ijm-ATP	0.95	0.71	0.83	0.07	-8.5	-7.6	1.9	Q05397	FAK1_HUMAN	Focal adhesion kinase 1 (FADK 1) (EC 2.7.10.2) (Focal adhesion kinase-related nonkinase) (FRNK) (Protein phosphatase 1 regulatory subunit 71) (PPP1R71) (Protein-tyrosine kinase 2) (p125FAK) (pp125FAK)	PTK2 FAK FAK1	Homo sapiens (Human)	2.7.10.2	[]	DISEASE: Note=Aberrant PTK2/FAK1 expression may play a role in cancer cell proliferation, migration and invasion, in tumor formation and metastasis. PTK2/FAK1 overexpression is seen in many types of cancer.
Camptothecin; Irinotecan	DNC000385	2y0j-AXC	0.9	0.75	0.83	0.24	-8.5	-8.1	1.1	Q9Y233	PDE10_HUMAN	cAMP and cAMP-inhibited cGMP 3',5'-cyclic phosphodiesterase 10A (EC 3.1.4.17) (EC 3.1.4.35)	PDE10A	Homo sapiens (Human)	3.1.4.17; 3.1.4.35	['schizoaffective disorder, schizophrenia', 'schizophrenia']
Camptothecin; Irinotecan	DNC000385	3l3m-A92	0.94	0.69	0.82	0.27	-9.7	-10.2	1.1	P09874	PARP1_HUMAN	Poly [ADP-ribose] polymerase 1 (PARP-1) (EC 2.4.2.30) (ADP-ribosyltransferase diphtheria toxin-like 1) (ARTD1) (NAD(+) ADP-ribosyltransferase 1) (ADPRT 1) (Poly[ADP-ribose] synthase 1)	PARP1 ADPRT PPOL	Homo sapiens (Human)	2.4.2.30	['brain cancer', 'cancer; solid tumors', 'solid tumors', 'hematological malignancies', 'melanoma', 'cancer', 'malignant melanoma', 'triple negative breast cancer', 'nsclc (combination therapy) (see also lymphoma)', 'neoplasm metastasis; solid tumors', 'inflammatory skin conditions', 'stroke', 'gastric cancer; breast cancer; ovarian cancer', 'brain ischaemia', 'breast/ovarian cancer', 'myocardial …
Camptothecin; Irinotecan	DNC000385	2oz7-CA4	0.94	0.69	0.82	0.16	-8.3	-11.3	0.7	P10275	ANDR_HUMAN	Androgen receptor (Dihydrotestosterone receptor) (Nuclear receptor subfamily 3 group C member 4)	AR DHTR NR3C4	Homo sapiens (Human)		['prostate cancer', 'metastatic castration-resistant prostate cancer', 'heart failure', 'alcoholic hepatitis', 'female androgenresponsive recurrent mammary cancer', 'osteoporosis in post-menopausal women', 'castration-resistant prostate cancer', 'metastatic castration-resistant prostate cancer in patients who have received docetaxel-based chemotherapy', 'advanced prostatic cancer', 'male hypogona…	DISEASE: Androgen insensitivity syndrome (AIS) [MIM:300068]: An X-linked recessive form of pseudohermaphroditism due end-organ resistance to androgen. Affected males have female external genitalia, female breast development, blind vagina, absent uterus and female adnexa, and abdominal or inguinal testes, despite a normal 46,XY karyotype. {ECO:0000269|PubMed:10022458, ECO:0000269|PubMed:10221692, …
Camptothecin; Irinotecan	DNC000385	3h6k-33T	0.95	0.66	0.8	0.15	-10.1	-10.3	1	P28845	DHI1_HUMAN	Corticosteroid 11-beta-dehydrogenase isozyme 1 (EC 1.1.1.146) (11-beta-hydroxysteroid dehydrogenase 1) (11-DH) (11-beta-HSD1)	HSD11B1 HSD11 HSD11L	Homo sapiens (Human)	1.1.1.146	['type 2 diabetes', 'diabetes mellitus type 1', 'diabetes mellitus type 2', 'diabetes, obesity', 'hypercholesterolemia', 'diabetes mellitus type 2/obesity']	DISEASE: Cortisone reductase deficiency (CRD) [MIM:604931]: In CRD, activation of cortisone to cortisol does not occur, resulting in adrenocorticotropin-mediated androgen excess and a phenotype resembling polycystic ovary syndrome (PCOS). Note=The disease is caused by mutations affecting the gene represented in this entry.
Camptothecin; Irinotecan	DNC000385	3cas-ASD	0.85	0.76	0.8	0.14	-9.3	-13.4	0.9	P51857	AK1D1_HUMAN	3-oxo-5-beta-steroid 4-dehydrogenase (EC 1.3.1.3) (Aldo-keto reductase family 1 member D1) (Delta(4)-3-ketosteroid 5-beta-reductase) (Delta(4)-3-oxosteroid 5-beta-reductase)	AKR1D1 SRD5B1	Homo sapiens (Human)	1.3.1.3	[]	DISEASE: Congenital bile acid synthesis defect 2 (CBAS2) [MIM:235555]: A condition characterized by jaundice, intrahepatic cholestasis and hepatic failure. Patients with this liver disease show absence or low levels of chenodeoxycholic acid and cholic acid in plasma and urine. {ECO:0000269|PubMed:12970144, ECO:0000269|PubMed:15030995}. Note=The disease is caused by mutations affecting the gene re…
Camptothecin; Irinotecan	DNC000385	2xng-A0H	0.86	0.75	0.8	0.22	-9.2	-7.9	2.5	O14965	AURKA_HUMAN	Aurora kinase A (EC 2.7.11.1) (Aurora 2) (Aurora/IPL1-related kinase 1) (ARK-1) (Aurora-related kinase 1) (hARK1) (Breast tumor-amplified kinase) (Serine/threonine-protein kinase 15) (Serine/threonine-protein kinase 6) (Serine/threonine-protein kinase aurora-A)	AURKA AIK AIRK1 ARK1 AURA AYK1 BTAK IAK1 STK15 STK6	Homo sapiens (Human)	2.7.11.1	['chronic myelogenous leukemia; leukemia; lymphoblastic, acute, philadelphia-positive', 'paediatric solid tumours or all', 'advanced malignancies', 'solid tumors', 'cml that relapsed after imatinib or bcr\xe2\x80\x93abl-targeted therapy; metastatic hormone refractory prostate cancer (mhrpc)', 'leukemia, myeloid', 'ovarian cancer, fallopian cancer, peritoneal cancer', 'leukemia', 'haematological m…
Camptothecin; Irinotecan	DNC000385	3huc-G97	0.84	0.76	0.8	0.23	-9.5	-9.9	1.4	Q16539	MK14_HUMAN	Mitogen-activated protein kinase 14 (MAP kinase 14) (MAPK 14) (EC 2.7.11.24) (Cytokine suppressive anti-inflammatory drug-binding protein) (CSAID-binding protein) (CSBP) (MAP kinase MXI2) (MAX-interacting protein 2) (Mitogen-activated protein kinase p38 alpha) (MAP kinase p38 alpha) (Stress-activated protein kinase 2a) (SAPK2a)	MAPK14 CSBP CSBP1 CSBP2 CSPB1 MXI2 SAPK2A	Homo sapiens (Human)	2.7.11.24	['cardiovascular disease, copd and depression', 'pain', 'copd', 'acute lung injury & acute respiratory distress syndrome']
Camptothecin; Irinotecan	DNC000385	1juj-LYA	0.83	0.77	0.8	0.26	-9.2	-9.8	1.4	P04818	TYSY_HUMAN	Thymidylate synthase (TS) (TSase) (EC 2.1.1.45)	TYMS TS OK/SW-cl.29	Homo sapiens (Human)	2.1.1.45	['malaria', 'non-squamous non-small cell lung cancer', 'viral infection', 'colorectal cancer', 'advanced gastric cancer', 'fungal infections', 'colon cancer', 'cancers', 'pleural mesothelioma', 'breast cancer', 'colon and rectum cancers']
Camptothecin; Irinotecan	DNC000385	3owh-52X	0.78	0.76	0.77	0.25	-10.8	-7.4	2.6	P16083	NQO2_HUMAN	Ribosyldihydronicotinamide dehydrogenase [quinone] (EC 1.10.99.2) (NRH dehydrogenase [quinone] 2) (NRH:quinone oxidoreductase 2) (Quinone reductase 2) (QR2)	NQO2 NMOR2	Homo sapiens (Human)	1.10.99.2	['cancer/tumors']
Capecitabine	DAP000761	1rfg-GMP	0.83	0.71	0.77	0.26	-7.5	-8.1	1.2	P00491	PNPH_HUMAN	Purine nucleoside phosphorylase (PNP) (EC 2.4.2.1) (Inosine phosphorylase) (Inosine-guanosine phosphorylase)	PNP NP	Homo sapiens (Human)	2.4.2.1	['moderate to severe plaque psoriasis', 'psoriasis, cutaneous t-cell lymphoma', 'refractory cutaneous t-cell lymphoma, b cell acute lymphoblastic leukemia']	DISEASE: Purine nucleoside phosphorylase deficiency (PNPD) [MIM:613179]: A disorder that interrupts both the catabolism of inosine into hypoxanthine and guanosine into guanine, and leads to the accumulation of guanosine, inosine, and their deoxified by-products. The main clinical presentation is recurrent infections due to severe T-cell immunodeficiency. Some patients also have neurologic impairm…
Capecitabine	DAP000761	3h6k-33T	0.77	0.66	0.72	0.1	-8	-10.3	1	P28845	DHI1_HUMAN	Corticosteroid 11-beta-dehydrogenase isozyme 1 (EC 1.1.1.146) (11-beta-hydroxysteroid dehydrogenase 1) (11-DH) (11-beta-HSD1)	HSD11B1 HSD11 HSD11L	Homo sapiens (Human)	1.1.1.146	['type 2 diabetes', 'diabetes mellitus type 1', 'diabetes mellitus type 2', 'diabetes, obesity', 'hypercholesterolemia', 'diabetes mellitus type 2/obesity']	DISEASE: Cortisone reductase deficiency (CRD) [MIM:604931]: In CRD, activation of cortisone to cortisol does not occur, resulting in adrenocorticotropin-mediated androgen excess and a phenotype resembling polycystic ovary syndrome (PCOS). Note=The disease is caused by mutations affecting the gene represented in this entry.
Carzinophilin	DNAP001671	3k8q-22A	0.84	0.87	0.86	0.06	-6.7	-6.4	1	P00491	PNPH_HUMAN	Purine nucleoside phosphorylase (PNP) (EC 2.4.2.1) (Inosine phosphorylase) (Inosine-guanosine phosphorylase)	PNP NP	Homo sapiens (Human)	2.4.2.1	['moderate to severe plaque psoriasis', 'psoriasis, cutaneous t-cell lymphoma', 'refractory cutaneous t-cell lymphoma, b cell acute lymphoblastic leukemia']	DISEASE: Purine nucleoside phosphorylase deficiency (PNPD) [MIM:613179]: A disorder that interrupts both the catabolism of inosine into hypoxanthine and guanosine into guanine, and leads to the accumulation of guanosine, inosine, and their deoxified by-products. The main clinical presentation is recurrent infections due to severe T-cell immunodeficiency. Some patients also have neurologic impairm…
Carzinophilin	DNAP001671	3mjw-WYF	0.93	0.76	0.85	0.22	-8.5	-10.2	0.3	P48736	PK3CG_HUMAN	Phosphatidylinositol 4,5-bisphosphate 3-kinase catalytic subunit gamma isoform (PI3-kinase subunit gamma) (PI3K-gamma) (PI3Kgamma) (PtdIns-3-kinase subunit gamma) (EC 2.7.1.153) (Phosphatidylinositol 4,5-bisphosphate 3-kinase 110 kDa catalytic subunit gamma) (PtdIns-3-kinase subunit p110-gamma) (p110gamma) (Phosphoinositide-3-kinase catalytic gamma polypeptide) (Serine/threonine protein kinase PI…	PIK3CG	Homo sapiens (Human)	2.7.1.153; 2.7.11.1	['metastatic breast cancer', 'lymphoma', 'solid tumors', "advanced solid tumours; non-hodgkin's lymphoma", 'cancer', 'advanced solid tumours; advanced breast cancer', 'myeloma (see also lymphoma)', 'metastatic solid tumors', 'thrombosis', 'advanced solid tumours; metastatic breast cancer; endometrial cancer; lymphoma', 'angioedema, myocardial infarction', 'advanced solid tumours', "advanced solid…
Carzinophilin	DNAP001671	3ox1-695	0.82	0.86	0.84	0.12	-8.7	-9.4	1.3	P16083	NQO2_HUMAN	Ribosyldihydronicotinamide dehydrogenase [quinone] (EC 1.10.99.2) (NRH dehydrogenase [quinone] 2) (NRH:quinone oxidoreductase 2) (Quinone reductase 2) (QR2)	NQO2 NMOR2	Homo sapiens (Human)	1.10.99.2	['cancer/tumors']
Carzinophilin	DNAP001671	3fzm-3GO	0.94	0.69	0.82	0.19	-7.1	-8.3	1.5	P11142	HSP7C_HUMAN	Heat shock cognate 71 kDa protein (Heat shock 70 kDa protein 8) (Lipopolysaccharide-associated protein 1) (LAP-1) (LPS-associated protein 1)	HSPA8 HSC70 HSP73 HSPA10	Homo sapiens (Human)		['bacterial infection']
Carzinophilin	DNAP001671	1ii6-ADP	0.95	0.67	0.81	0.07	-8.9	-8.3	0.8	P52732	KIF11_HUMAN	Kinesin-like protein KIF11 (Kinesin-like protein 1) (Kinesin-like spindle protein HKSP) (Kinesin-related motor protein Eg5) (Thyroid receptor-interacting protein 5) (TR-interacting protein 5) (TRIP-5)	KIF11 EG5 KNSL1 TRIP5	Homo sapiens (Human)		['solid tumors', 'pediatric', 'liver cancers', 'late-stage solid tumors (see also other)', 'a variety of cancers', "non-hodgkin's lymphoma, cancer/tumors", 'head and neck cancer, renal cell carcinoma, ovarian cancer, solid tumors', 'solid tumour and malignant lymphoma', 'cancer/tumors', 'lung cancer', 'hematological malignancies (see also solid tumors)']	DISEASE: Microcephaly with or without chorioretinopathy, lymphedema, or mental retardation (MCLMR) [MIM:152950]: An autosomal dominant disorder that involves an overlapping but variable spectrum of central nervous system and ocular developmental anomalies. Microcephaly ranges from mild to severe and is often associated with mild to moderate developmental delay and a characteristic facial phenotyp…
Cladribine	DAP000565	3ggs-2FD	0.83	0.74	0.78	0.81	-7.7	-7	2	P00491	PNPH_HUMAN	Purine nucleoside phosphorylase (PNP) (EC 2.4.2.1) (Inosine phosphorylase) (Inosine-guanosine phosphorylase)	PNP NP	Homo sapiens (Human)	2.4.2.1	['moderate to severe plaque psoriasis', 'psoriasis, cutaneous t-cell lymphoma', 'refractory cutaneous t-cell lymphoma, b cell acute lymphoblastic leukemia']	DISEASE: Purine nucleoside phosphorylase deficiency (PNPD) [MIM:613179]: A disorder that interrupts both the catabolism of inosine into hypoxanthine and guanosine into guanine, and leads to the accumulation of guanosine, inosine, and their deoxified by-products. The main clinical presentation is recurrent infections due to severe T-cell immunodeficiency. Some patients also have neurologic impairm…
Clofarabine	DAP000849	1rfg-GMP	0.98	0.97	0.98	0.65	-7.1	-8.1	1.2	P00491	PNPH_HUMAN	Purine nucleoside phosphorylase (PNP) (EC 2.4.2.1) (Inosine phosphorylase) (Inosine-guanosine phosphorylase)	PNP NP	Homo sapiens (Human)	2.4.2.1	['moderate to severe plaque psoriasis', 'psoriasis, cutaneous t-cell lymphoma', 'refractory cutaneous t-cell lymphoma, b cell acute lymphoblastic leukemia']	DISEASE: Purine nucleoside phosphorylase deficiency (PNPD) [MIM:613179]: A disorder that interrupts both the catabolism of inosine into hypoxanthine and guanosine into guanine, and leads to the accumulation of guanosine, inosine, and their deoxified by-products. The main clinical presentation is recurrent infections due to severe T-cell immunodeficiency. Some patients also have neurologic impairm…
Colchicine	DAP001254	3iak-EV1	0.88	0.78	0.83	0.35	-7	-7.5	1	Q08499	PDE4D_HUMAN	cAMP-specific 3',5'-cyclic phosphodiesterase 4D (EC 3.1.4.53) (DPDE3) (PDE43)	PDE4D DPDE3	Homo sapiens (Human)	3.1.4.53	['psoriasis', 'atopic dermatitis', 'psoriasis and psoriatic disorders', 'emphysema, bronchitis, chronic obstructive pulmonary disease', 'chronic obstructive pulmonary disease', 'atopic dermatitis (ad)', 'cough']	DISEASE: Note=Genetic variations in PDE4D might be associated with susceptibility to stroke. PubMed:17006457 states that association with stroke has to be considered with caution.; DISEASE: Acrodysostosis 2, with or without hormone resistance (ACRDYS2) [MIM:614613]: A pleiotropic disorder characterized by skeletal, endocrine, and neurological abnormalities. Skeletal features include brachycephaly…
Colchicine	DAP001254	3o9v-10T	0.87	0.72	0.79	0.29	-6.4	-6.9	1.3	P27487	DPP4_HUMAN	Dipeptidyl peptidase 4 (EC 3.4.14.5) (ADABP) (Adenosine deaminase complexing protein 2) (ADCP-2) (Dipeptidyl peptidase IV) (DPP IV) (T-cell activation antigen CD26) (TP103) (CD antigen CD26) [Cleaved into: Dipeptidyl peptidase 4 membrane form (Dipeptidyl peptidase IV membrane form); Dipeptidyl peptidase 4 soluble form (Dipeptidyl peptidase IV soluble form)]	DPP4 ADCP2 CD26	Homo sapiens (Human)	3.4.14.5	['diabetes mellitus', 'type 2 diabetes', 'diabetes mellitus type ii', 'diabetes', 'hyperglycaemia in type 2 diabetes mellitus']
Colchicine	DAP001254	2v3e-NND	0.74	0.82	0.78	0.01	-7.9	-6.5	1.3	P04062	GLCM_HUMAN	Glucosylceramidase (EC 3.2.1.45) (Acid beta-glucosidase) (Alglucerase) (Beta-glucocerebrosidase) (Beta-GC) (D-glucosyl-N-acylsphingosine glucohydrolase) (Imiglucerase)	GBA GC GLUC	Homo sapiens (Human)	3.2.1.45	['metabolic disease']	DISEASE: Gaucher disease (GD) [MIM:230800]: A lysosomal storage disease due to deficient activity of beta-glucocerebrosidase and characterized by accumulation of glucosylceramide in the reticulo-endothelial system. Different clinical forms are recognized depending on the presence (neuronopathic forms) or absence of central nervous system involvement, severity and age of onset. {ECO:0000269|PubMed…
Colchicine	DAP001254	3kku-B95	0.69	0.86	0.77	0.15	-5.2	-5	2.5	P25779	CYSP_TRYCR	Cruzipain (EC 3.4.22.51) (Cruzaine) (Major cysteine proteinase)		Trypanosoma cruzi	3.4.22.51	['p. falciparum']
Cytarabine ocfosfate	DNAP001432	3dop-BDT	0.86	0.96	0.91	0.1	-6.6	-8.4	0.4	P51857	AK1D1_HUMAN	3-oxo-5-beta-steroid 4-dehydrogenase (EC 1.3.1.3) (Aldo-keto reductase family 1 member D1) (Delta(4)-3-ketosteroid 5-beta-reductase) (Delta(4)-3-oxosteroid 5-beta-reductase)	AKR1D1 SRD5B1	Homo sapiens (Human)	1.3.1.3	[]	DISEASE: Congenital bile acid synthesis defect 2 (CBAS2) [MIM:235555]: A condition characterized by jaundice, intrahepatic cholestasis and hepatic failure. Patients with this liver disease show absence or low levels of chenodeoxycholic acid and cholic acid in plasma and urine. {ECO:0000269|PubMed:12970144, ECO:0000269|PubMed:15030995}. Note=The disease is caused by mutations affecting the gene re…
Cytarabine ocfosfate	DNAP001432	1ihi-IU5	0.86	0.94	0.9	0.13	-7.1	-9	1.3	P52895	AK1C2_HUMAN	Aldo-keto reductase family 1 member C2 (EC 1.-.-.-) (3-alpha-HSD3) (Chlordecone reductase homolog HAKRD) (Dihydrodiol dehydrogenase 2) (DD-2) (DD2) (Dihydrodiol dehydrogenase/bile acid-binding protein) (DD/BABP) (Trans-1,2-dihydrobenzene-1,2-diol dehydrogenase) (EC 1.3.1.20) (Type III 3-alpha-hydroxysteroid dehydrogenase) (EC 1.1.1.357)	AKR1C2 DDH2	Homo sapiens (Human)	1.-.-.-; 1.3.1.20; 1.1.1.357	[]	DISEASE: 46,XY sex reversal 8 (SRXY8) [MIM:614279]: A disorder of sex development. Affected individuals have a 46,XY karyotype but present as phenotypically normal females. {ECO:0000269|PubMed:21802064}. Note=The disease is caused by mutations affecting the gene represented in this entry.
Cytarabine ocfosfate	DNAP001432	1z70-CXS	0.81	0.94	0.88	0.06	-4	-3.8	2.1	Q8NBK3	SUMF1_HUMAN	Sulfatase-modifying factor 1 (EC 1.8.99.-) (C-alpha-formylglycine-generating enzyme 1)	SUMF1 FGE PSEC0152 UNQ3037/PRO9852	Homo sapiens (Human)	1.8.99.-	[]	DISEASE: Multiple sulfatase deficiency (MSD) [MIM:272200]: A clinically and biochemically heterogeneous disorder caused by the simultaneous impairment of all sulfatases, due to defective post-translational modification and activation. It combines features of individual sulfatase deficiencies such as metachromatic leukodystrophy, mucopolysaccharidosis, chondrodysplasia punctata, hydrocephalus, ich…
Cytarabine ocfosfate	DNAP001432	3fzf-ATP	0.96	0.78	0.87	0.18	-7	-8.4	0.7	P11142	HSP7C_HUMAN	Heat shock cognate 71 kDa protein (Heat shock 70 kDa protein 8) (Lipopolysaccharide-associated protein 1) (LAP-1) (LPS-associated protein 1)	HSPA8 HSC70 HSP73 HSPA10	Homo sapiens (Human)		['bacterial infection']
Cytosine arabinoside; Ara-C	DAP000644	1rfg-GMP	0.99	0.99	0.99	0.52	-7.3	-8.1	1.2	P00491	PNPH_HUMAN	Purine nucleoside phosphorylase (PNP) (EC 2.4.2.1) (Inosine phosphorylase) (Inosine-guanosine phosphorylase)	PNP NP	Homo sapiens (Human)	2.4.2.1	['moderate to severe plaque psoriasis', 'psoriasis, cutaneous t-cell lymphoma', 'refractory cutaneous t-cell lymphoma, b cell acute lymphoblastic leukemia']	DISEASE: Purine nucleoside phosphorylase deficiency (PNPD) [MIM:613179]: A disorder that interrupts both the catabolism of inosine into hypoxanthine and guanosine into guanine, and leads to the accumulation of guanosine, inosine, and their deoxified by-products. The main clinical presentation is recurrent infections due to severe T-cell immunodeficiency. Some patients also have neurologic impairm…
Cytosine arabinoside; Ara-C	DAP000644	3fzh-3BH	0.99	0.92	0.96	0.44	-7	-7.3	0.4	P11142	HSP7C_HUMAN	Heat shock cognate 71 kDa protein (Heat shock 70 kDa protein 8) (Lipopolysaccharide-associated protein 1) (LAP-1) (LPS-associated protein 1)	HSPA8 HSC70 HSP73 HSPA10	Homo sapiens (Human)		['bacterial infection']
Cytosine arabinoside; Ara-C	DAP000644	3msl-EV5	0.91	0.99	0.95	0.09	-5.2	-6.7	2.7	P56817	BACE1_HUMAN	Beta-secretase 1 (EC 3.4.23.46) (Aspartyl protease 2) (ASP2) (Asp 2) (Beta-site amyloid precursor protein cleaving enzyme 1) (Beta-site APP cleaving enzyme 1) (Memapsin-2) (Membrane-associated aspartic protease 2)	BACE1 BACE KIAA1149	Homo sapiens (Human)	3.4.23.46	["alzheimer's disease"]
Cytosine arabinoside; Ara-C	DAP000644	2ano-817	0.89	0.99	0.94	0.03	-5.5	-7	1.8	P0ABQ4	DYR_ECOLI	Dihydrofolate reductase (EC 1.5.1.3)	folA tmrA b0048 JW0047	Escherichia coli (strain K12)	1.5.1.3	['gram-positive and -negative bacterial infections', 'malaria and bacterial infections', 'malaria', 'leukemia', 'plasmodium falciparum', 'peripheral t cell lymphoma', 'bacterial infections', 'urinary tract infections', 'acute malaria', 'pneumocystis pneumonia (pcp)', 'advanced cancer']
Dasatinib	DAP000004	3lfa-1N1	0.94	0.94	0.94	1	-7.7	-7.9	1.5	Q16539	MK14_HUMAN	Mitogen-activated protein kinase 14 (MAP kinase 14) (MAPK 14) (EC 2.7.11.24) (Cytokine suppressive anti-inflammatory drug-binding protein) (CSAID-binding protein) (CSBP) (MAP kinase MXI2) (MAX-interacting protein 2) (Mitogen-activated protein kinase p38 alpha) (MAP kinase p38 alpha) (Stress-activated protein kinase 2a) (SAPK2a)	MAPK14 CSBP CSBP1 CSBP2 CSPB1 MXI2 SAPK2A	Homo sapiens (Human)	2.7.11.24	['cardiovascular disease, copd and depression', 'pain', 'copd', 'acute lung injury & acute respiratory distress syndrome']
Dasatinib	DAP000004	2w1e-L0E	0.85	0.85	0.85	0.32	-8.3	-7.9	0.9	O14965	AURKA_HUMAN	Aurora kinase A (EC 2.7.11.1) (Aurora 2) (Aurora/IPL1-related kinase 1) (ARK-1) (Aurora-related kinase 1) (hARK1) (Breast tumor-amplified kinase) (Serine/threonine-protein kinase 15) (Serine/threonine-protein kinase 6) (Serine/threonine-protein kinase aurora-A)	AURKA AIK AIRK1 ARK1 AURA AYK1 BTAK IAK1 STK15 STK6	Homo sapiens (Human)	2.7.11.1	['chronic myelogenous leukemia; leukemia; lymphoblastic, acute, philadelphia-positive', 'paediatric solid tumours or all', 'advanced malignancies', 'solid tumors', 'cml that relapsed after imatinib or bcr\xe2\x80\x93abl-targeted therapy; metastatic hormone refractory prostate cancer (mhrpc)', 'leukemia, myeloid', 'ovarian cancer, fallopian cancer, peritoneal cancer', 'leukemia', 'haematological m…
Dasatinib	DAP000004	3f5p-741	0.83	0.81	0.82	0.29	-7.7	-6.7	1.7	P08069	IGF1R_HUMAN	Insulin-like growth factor 1 receptor (EC 2.7.10.1) (Insulin-like growth factor I receptor) (IGF-I receptor) (CD antigen CD221) [Cleaved into: Insulin-like growth factor 1 receptor alpha chain; Insulin-like growth factor 1 receptor beta chain]	IGF1R	Homo sapiens (Human)	2.7.10.1	['igf-1 deficiency', 'cancer', 'various cancers, multiple myeloma', "nsclc, ewing's sarcoma and metastatic breast cancer", 'multiple myeloma', 'non-small cell lung cancer (biologic)', 'cancers', 'on-small cell lung cancer', "gastrointestinal cancers; genitourinary; ewing's sarcoma; small cell lung cancer; breast cancer (biologic)"]	DISEASE: Insulin-like growth factor 1 resistance (IGF1RES) [MIM:270450]: A disorder characterized by intrauterine growth retardation, poor postnatal growth and increased plasma IGF1 levels. {ECO:0000269|PubMed:14657428, ECO:0000269|PubMed:15928254}. Note=The disease is caused by mutations affecting the gene represented in this entry.
Dasatinib	DAP000004	3emg-685	0.76	0.86	0.81	0.26	-7	-8.7	0.7	P43405	KSYK_HUMAN	Tyrosine-protein kinase SYK (EC 2.7.10.2) (Spleen tyrosine kinase) (p72-Syk)	SYK	Homo sapiens (Human)	2.7.10.2	["rheumatoid arthritis, thrombocytopenia, non-hodgkin's lymphoma", 'hematological malignancies', 'cancer', 'rheumatoid arthritis', 'allergic reaction, asthma', 'haematological malignancies', 'b-cell hematological malignancies', 'b-cell malignancies']
Dasatinib	DAP000004	3ert-OHT	0.75	0.83	0.79	0.15	-8.9	-9.9	1.8	P03372	ESR1_HUMAN	Estrogen receptor (ER) (ER-alpha) (Estradiol receptor) (Nuclear receptor subfamily 3 group A member 1)	ESR1 ESR NR3A1	Homo sapiens (Human)		['menopausal and postmenopausal disorders', 'first oral contraceptives', 'breast cancer and prostate cancer', 'menorrhagia', 'adrenocortical carcinoma', 'atrophic vaginitis', 'female hypogonadism', 'post-menopausal vaginal atrophy', 'female infertility', 'osteoporosis in post-menopausal women', 'antiprogestogenic', 'menopause', 'first-line advanced prostate cancer, second-line advanced prostate c…	DISEASE: Estrogen resistance (ESTRR) [MIM:615363]: A disorder characterized by partial or complete resistance to estrogens, in the presence of elevated estrogen serum levels. Clinical features include absence of the pubertal growth spurt, delayed bone maturation, unfused epiphyses, reduced bone mineral density, osteoporosis, continued growth into adulthood and very tall adult stature. Glucose int…
Dasatinib	DAP000004	2b37-8PS	0.75	0.82	0.78	0.17	-6.9	-6	3.7	P0A5Y6	INHA_MYCTU	Enoyl-[acyl-carrier-protein] reductase [NADH] (EC 1.3.1.9) (NADH-dependent enoyl-ACP reductase)	inhA Rv1484 MTCY277.05	Mycobacterium tuberculosis (strain ATCC 25618 / H37Rv)	2.5.1.86; 2.5.1.87	['tuberculosis']
Daunorubicin; daunomycin; rubomycin C	DAP000788	1el3-I84	0.81	0.84	0.83	0.17	-9.6	-7.7	4.8	P15121	ALDR_HUMAN	Aldose reductase (AR) (EC 1.1.1.21) (Aldehyde reductase) (Aldo-keto reductase family 1 member B1)	AKR1B1 ALDR1	Homo sapiens (Human)	1.1.1.21	['rheumatoid arthritis', 'diabetic neuropathy', 'diabetes']
Daunorubicin; daunomycin; rubomycin C	DAP000788	1kvl-THN	0.8	0.85	0.83	0.13	-7.8	-6.8	1.2	P00811	AMPC_ECOLI	Beta-lactamase (EC 3.5.2.6) (Cephalosporinase)	ampC ampA b4150 JW4111	Escherichia coli (strain K12)	3.5.2.6	['mrsa', 'gram-positive and -negative bacterial infections', 'bacterial infections', 'serious infections', 'infection']
Daunorubicin; daunomycin; rubomycin C	DAP000788	2j91-AMP	0.85	0.71	0.78	0.1	-6.4	-7	4.4	P30566	PUR8_HUMAN	Adenylosuccinate lyase (ASL) (EC 4.3.2.2) (Adenylosuccinase) (ASase)	ADSL AMPS	Homo sapiens (Human)	4.3.2.2	[]	DISEASE: Adenylosuccinase deficiency (ADSL deficiency) [MIM:103050]: An autosomal recessive disorder characterized by the accumulation in the body fluids of succinylaminoimidazole-carboxamide riboside (SAICA-riboside) and succinyladenosine (S-Ado). Most children display marked psychomotor delay, often accompanied by epilepsy or autistic features, or both, although some patients may be less profou…
Daunorubicin; daunomycin; rubomycin C	DAP000788	3ldq-3P1	0.85	0.7	0.77	0.18	-9.6	-6.8	2.7	P11142	HSP7C_HUMAN	Heat shock cognate 71 kDa protein (Heat shock 70 kDa protein 8) (Lipopolysaccharide-associated protein 1) (LAP-1) (LPS-associated protein 1)	HSPA8 HSC70 HSP73 HSPA10	Homo sapiens (Human)		['bacterial infection']
Daunorubicin; daunomycin; rubomycin C	DAP000788	3ofi-MET_GLN_ILE	0.73	0.82	0.77	0.17	-6.9	-5.3	2.2	P14735	IDE_HUMAN	Insulin-degrading enzyme (EC 3.4.24.56) (Abeta-degrading protease) (Insulin protease) (Insulinase) (Insulysin)	IDE	Homo sapiens (Human)	3.4.24.56	['bacterial infection']
Decitabine	DAP000641	3ggs-2FD	0.83	0.71	0.77	0.55	-6.7	-7	2	P00491	PNPH_HUMAN	Purine nucleoside phosphorylase (PNP) (EC 2.4.2.1) (Inosine phosphorylase) (Inosine-guanosine phosphorylase)	PNP NP	Homo sapiens (Human)	2.4.2.1	['moderate to severe plaque psoriasis', 'psoriasis, cutaneous t-cell lymphoma', 'refractory cutaneous t-cell lymphoma, b cell acute lymphoblastic leukemia']	DISEASE: Purine nucleoside phosphorylase deficiency (PNPD) [MIM:613179]: A disorder that interrupts both the catabolism of inosine into hypoxanthine and guanosine into guanine, and leads to the accumulation of guanosine, inosine, and their deoxified by-products. The main clinical presentation is recurrent infections due to severe T-cell immunodeficiency. Some patients also have neurologic impairm…
Demecolcine	DNAP001634	3iak-EV1	0.85	0.74	0.79	0.38	-8	-7.5	1	Q08499	PDE4D_HUMAN	cAMP-specific 3',5'-cyclic phosphodiesterase 4D (EC 3.1.4.53) (DPDE3) (PDE43)	PDE4D DPDE3	Homo sapiens (Human)	3.1.4.53	['psoriasis', 'atopic dermatitis', 'psoriasis and psoriatic disorders', 'emphysema, bronchitis, chronic obstructive pulmonary disease', 'chronic obstructive pulmonary disease', 'atopic dermatitis (ad)', 'cough']	DISEASE: Note=Genetic variations in PDE4D might be associated with susceptibility to stroke. PubMed:17006457 states that association with stroke has to be considered with caution.; DISEASE: Acrodysostosis 2, with or without hormone resistance (ACRDYS2) [MIM:614613]: A pleiotropic disorder characterized by skeletal, endocrine, and neurological abnormalities. Skeletal features include brachycephaly…
Demecolcine	DNAP001634	3ine-X17	0.85	0.73	0.79	0.18	-7.4	-9.4	1.4	P56817	BACE1_HUMAN	Beta-secretase 1 (EC 3.4.23.46) (Aspartyl protease 2) (ASP2) (Asp 2) (Beta-site amyloid precursor protein cleaving enzyme 1) (Beta-site APP cleaving enzyme 1) (Memapsin-2) (Membrane-associated aspartic protease 2)	BACE1 BACE KIAA1149	Homo sapiens (Human)	3.4.23.46	["alzheimer's disease"]
Demecolcine	DNAP001634	1rwq-5AP	0.85	0.72	0.78	0.22	-6.3	-7	1.5	P27487	DPP4_HUMAN	Dipeptidyl peptidase 4 (EC 3.4.14.5) (ADABP) (Adenosine deaminase complexing protein 2) (ADCP-2) (Dipeptidyl peptidase IV) (DPP IV) (T-cell activation antigen CD26) (TP103) (CD antigen CD26) [Cleaved into: Dipeptidyl peptidase 4 membrane form (Dipeptidyl peptidase IV membrane form); Dipeptidyl peptidase 4 soluble form (Dipeptidyl peptidase IV soluble form)]	DPP4 ADCP2 CD26	Homo sapiens (Human)	3.4.14.5	['diabetes mellitus', 'type 2 diabetes', 'diabetes mellitus type ii', 'diabetes', 'hyperglycaemia in type 2 diabetes mellitus']
Demecolcine	DNAP001634	1xm6-5RM	0.86	0.66	0.76	0.28	-7.8	-8.8	1.3	Q07343	PDE4B_HUMAN	cAMP-specific 3',5'-cyclic phosphodiesterase 4B (EC 3.1.4.53) (DPDE4) (PDE32)	PDE4B DPDE4	Homo sapiens (Human)	3.1.4.53	['psoriasis', 'atopic dermatitis', 'psoriasis and psoriatic disorders', 'emphysema, bronchitis, chronic obstructive pulmonary disease', 'chronic obstructive pulmonary disease', 'atopic dermatitis (ad)']
Demecolcine	DNAP001634	1nhw-TCC	0.79	0.72	0.76	0.12	-6.8	-7	1	Q9BH77	Q9BH77_PLAFA	Enoyl-ACP reductase (Enoyl-acyl carrier reductase)	FabI	Plasmodium falciparum		['p. falciparum, trypanosoma', 'bacterial infections']
Demecolcine	DNAP001634	3kku-B95	0.66	0.81	0.74	0.15	-5.1	-5	2.5	P25779	CYSP_TRYCR	Cruzipain (EC 3.4.22.51) (Cruzaine) (Major cysteine proteinase)		Trypanosoma cruzi	3.4.22.51	['p. falciparum']
Demecolcine	DNAP001634	3g5m-XM5_XM5	0.67	0.76	0.72	0.27	-6.1	-7.8	2.1	P16083	NQO2_HUMAN	Ribosyldihydronicotinamide dehydrogenase [quinone] (EC 1.10.99.2) (NRH dehydrogenase [quinone] 2) (NRH:quinone oxidoreductase 2) (Quinone reductase 2) (QR2)	NQO2 NMOR2	Homo sapiens (Human)	1.10.99.2	['cancer/tumors']
Doxifluridine	DNAP001503	1rfg-GMP	0.86	0.73	0.79	0.38	-7.9	-8.1	1.2	P00491	PNPH_HUMAN	Purine nucleoside phosphorylase (PNP) (EC 2.4.2.1) (Inosine phosphorylase) (Inosine-guanosine phosphorylase)	PNP NP	Homo sapiens (Human)	2.4.2.1	['moderate to severe plaque psoriasis', 'psoriasis, cutaneous t-cell lymphoma', 'refractory cutaneous t-cell lymphoma, b cell acute lymphoblastic leukemia']	DISEASE: Purine nucleoside phosphorylase deficiency (PNPD) [MIM:613179]: A disorder that interrupts both the catabolism of inosine into hypoxanthine and guanosine into guanine, and leads to the accumulation of guanosine, inosine, and their deoxified by-products. The main clinical presentation is recurrent infections due to severe T-cell immunodeficiency. Some patients also have neurologic impairm…
Doxorubicin; doxorubicin hydrochloride; hydroxydaunorubicin	DAP000192	1el3-I84	0.81	0.85	0.83	0.16	-8.5	-7.7	4.8	P15121	ALDR_HUMAN	Aldose reductase (AR) (EC 1.1.1.21) (Aldehyde reductase) (Aldo-keto reductase family 1 member B1)	AKR1B1 ALDR1	Homo sapiens (Human)	1.1.1.21	['rheumatoid arthritis', 'diabetic neuropathy', 'diabetes']
Doxorubicin; doxorubicin hydrochloride; hydroxydaunorubicin	DAP000192	1kvl-THN	0.8	0.86	0.83	0.13	-7.4	-6.8	1.2	P00811	AMPC_ECOLI	Beta-lactamase (EC 3.5.2.6) (Cephalosporinase)	ampC ampA b4150 JW4111	Escherichia coli (strain K12)	3.5.2.6	['mrsa', 'gram-positive and -negative bacterial infections', 'bacterial infections', 'serious infections', 'infection']
Doxorubicin; doxorubicin hydrochloride; hydroxydaunorubicin	DAP000192	3ks9-Z99	0.76	0.84	0.8	0.2	-8.1	-8.4	0.9	Q13255	GRM1_HUMAN	Metabotropic glutamate receptor 1 (mGluR1)	GRM1 GPRC1A MGLUR1	Homo sapiens (Human)		['huntington disease', 'schizophrenia', 'neuropathic pain', "alzheimer's disease"]	DISEASE: Spinocerebellar ataxia, autosomal recessive, 13 (SCAR13) [MIM:614831]: Spinocerebellar ataxia is a clinically and genetically heterogeneous group of cerebellar disorders. Patients show progressive incoordination of gait and often poor coordination of hands, speech and eye movements, due to degeneration of the cerebellum with variable involvement of the brainstem and spinal cord. SCAR13 i…
Doxorubicin; doxorubicin hydrochloride; hydroxydaunorubicin	DAP000192	3ofi-MET_GLN_ILE	0.73	0.85	0.79	0.17	-7.3	-5.3	2.2	P14735	IDE_HUMAN	Insulin-degrading enzyme (EC 3.4.24.56) (Abeta-degrading protease) (Insulin protease) (Insulinase) (Insulysin)	IDE	Homo sapiens (Human)	3.4.24.56	['bacterial infection']
Doxorubicin; doxorubicin hydrochloride; hydroxydaunorubicin	DAP000192	3ldq-3P1	0.85	0.72	0.78	0.19	-8	-6.8	2.7	P11142	HSP7C_HUMAN	Heat shock cognate 71 kDa protein (Heat shock 70 kDa protein 8) (Lipopolysaccharide-associated protein 1) (LAP-1) (LPS-associated protein 1)	HSPA8 HSC70 HSP73 HSPA10	Homo sapiens (Human)		['bacterial infection']
Doxorubicin; doxorubicin hydrochloride; hydroxydaunorubicin	DAP000192	2j91-AMP	0.85	0.71	0.78	0.1	-6.2	-7	4.4	P30566	PUR8_HUMAN	Adenylosuccinate lyase (ASL) (EC 4.3.2.2) (Adenylosuccinase) (ASase)	ADSL AMPS	Homo sapiens (Human)	4.3.2.2	[]	DISEASE: Adenylosuccinase deficiency (ADSL deficiency) [MIM:103050]: An autosomal recessive disorder characterized by the accumulation in the body fluids of succinylaminoimidazole-carboxamide riboside (SAICA-riboside) and succinyladenosine (S-Ado). Most children display marked psychomotor delay, often accompanied by epilepsy or autistic features, or both, although some patients may be less profou…
Elliptinium acetate	DNAP001575	1yry-MSG	0.88	0.87	0.88	0.07	-7.9	-6.1	1.7	P00491	PNPH_HUMAN	Purine nucleoside phosphorylase (PNP) (EC 2.4.2.1) (Inosine phosphorylase) (Inosine-guanosine phosphorylase)	PNP NP	Homo sapiens (Human)	2.4.2.1	['moderate to severe plaque psoriasis', 'psoriasis, cutaneous t-cell lymphoma', 'refractory cutaneous t-cell lymphoma, b cell acute lymphoblastic leukemia']	DISEASE: Purine nucleoside phosphorylase deficiency (PNPD) [MIM:613179]: A disorder that interrupts both the catabolism of inosine into hypoxanthine and guanosine into guanine, and leads to the accumulation of guanosine, inosine, and their deoxified by-products. The main clinical presentation is recurrent infections due to severe T-cell immunodeficiency. Some patients also have neurologic impairm…
Elliptinium acetate	DNAP001575	3iak-EV1	0.92	0.76	0.84	0.3	-9.5	-7.5	1	Q08499	PDE4D_HUMAN	cAMP-specific 3',5'-cyclic phosphodiesterase 4D (EC 3.1.4.53) (DPDE3) (PDE43)	PDE4D DPDE3	Homo sapiens (Human)	3.1.4.53	['psoriasis', 'atopic dermatitis', 'psoriasis and psoriatic disorders', 'emphysema, bronchitis, chronic obstructive pulmonary disease', 'chronic obstructive pulmonary disease', 'atopic dermatitis (ad)', 'cough']	DISEASE: Note=Genetic variations in PDE4D might be associated with susceptibility to stroke. PubMed:17006457 states that association with stroke has to be considered with caution.; DISEASE: Acrodysostosis 2, with or without hormone resistance (ACRDYS2) [MIM:614613]: A pleiotropic disorder characterized by skeletal, endocrine, and neurological abnormalities. Skeletal features include brachycephaly…
Elliptinium acetate	DNAP001575	3kku-B95	0.79	0.88	0.84	0.12	-7.1	-5	2.5	P25779	CYSP_TRYCR	Cruzipain (EC 3.4.22.51) (Cruzaine) (Major cysteine proteinase)		Trypanosoma cruzi	3.4.22.51	['p. falciparum']
Elliptinium acetate	DNAP001575	2qge-MR6	0.79	0.87	0.83	0.35	-5.5	-4.7	2.3	P02766	TTHY_HUMAN	Transthyretin (ATTR) (Prealbumin) (TBPA)	TTR PALB	Homo sapiens (Human)		['amyloidosis', 'ttr amyloidosis']	DISEASE: Amyloidosis, transthyretin-related (AMYL-TTR) [MIM:105210]: A hereditary generalized amyloidosis due to transthyretin amyloid deposition. Protein fibrils can form in different tissues leading to amyloid polyneuropathies, amyloidotic cardiomyopathy, carpal tunnel syndrome, systemic senile amyloidosis. The disease includes leptomeningeal amyloidosis that is characterized by primary involve…
Elliptinium acetate	DNAP001575	2ye8-2D3	0.75	0.88	0.82	0.19	-8.9	-5.9	1.5	P07900	HS90A_HUMAN	Heat shock protein HSP 90-alpha (Heat shock 86 kDa) (HSP 86) (HSP86) (Lipopolysaccharide-associated protein 2) (LAP-2) (LPS-associated protein 2) (Renal carcinoma antigen NY-REN-38)	HSP90AA1 HSP90A HSPC1 HSPCA	Homo sapiens (Human)		['breast cancer, melanoma', 'solid tumors', 'ovarian cancer, refractory hematological malignancies', 'solid tumors, chronic myelogenous leukemia', 'refractory acute myelogenous leukemia; her2-positive metastatic breast cancer and leukaemia', 'gastrointestinal stromal tumors', 'multiple myeloma', 'non-small cell lung cancer', 'hematological malignancies', 'cancer/tumors', 'prostate cancer']
Elliptinium acetate	DNAP001575	3g45-988	0.92	0.68	0.8	0.27	-9	-11.6	0.4	Q07343	PDE4B_HUMAN	cAMP-specific 3',5'-cyclic phosphodiesterase 4B (EC 3.1.4.53) (DPDE4) (PDE32)	PDE4B DPDE4	Homo sapiens (Human)	3.1.4.53	['psoriasis', 'atopic dermatitis', 'psoriasis and psoriatic disorders', 'emphysema, bronchitis, chronic obstructive pulmonary disease', 'chronic obstructive pulmonary disease', 'atopic dermatitis (ad)']
Elliptinium acetate	DNAP001575	3lxp-IZA	0.93	0.66	0.8	0.36	-10.3	-11.3	0.2	P29597	TYK2_HUMAN	Non-receptor tyrosine-protein kinase TYK2 (EC 2.7.10.2)	TYK2	Homo sapiens (Human)	2.7.10.2	['solid tumors']	DISEASE: Immunodeficiency 35 (IMD35) [MIM:611521]: A primary immunodeficiency characterized by recurrent skin abscesses, pneumonia, and highly elevated serum IgE. {ECO:0000269|PubMed:17088085}. Note=The disease is caused by mutations affecting the gene represented in this entry.
Enocitabine	DNAP001568	3ldq-3P1	0.95	0.81	0.88	0.12	-5.6	-6.8	2.7	P11142	HSP7C_HUMAN	Heat shock cognate 71 kDa protein (Heat shock 70 kDa protein 8) (Lipopolysaccharide-associated protein 1) (LAP-1) (LPS-associated protein 1)	HSPA8 HSC70 HSP73 HSPA10	Homo sapiens (Human)		['bacterial infection']
Enocitabine	DNAP001568	3eq1-DPM	0.95	0.81	0.88	0.12	-5.4	-7.3	1.4	P08397	HEM3_HUMAN	Porphobilinogen deaminase (PBG-D) (EC 2.5.1.61) (Hydroxymethylbilane synthase) (HMBS) (Pre-uroporphyrinogen synthase)	HMBS PBGD UPS	Homo sapiens (Human)	2.5.1.61	[]	DISEASE: Acute intermittent porphyria (AIP) [MIM:176000]: A form of porphyria. Porphyrias are inherited defects in the biosynthesis of heme, resulting in the accumulation and increased excretion of porphyrins or porphyrin precursors. They are classified as erythropoietic or hepatic, depending on whether the enzyme deficiency occurs in red blood cells or in the liver. AIP is an autosomal dominant …
Enocitabine	DNAP001568	1hrk-CHD	0.81	0.92	0.87	0.1	-5.8	-7.1	1.1	P22830	HEMH_HUMAN	Ferrochelatase, mitochondrial (EC 4.99.1.1) (Heme synthase) (Protoheme ferro-lyase)	FECH	Homo sapiens (Human)	4.99.1.1	['photodynamic therapy']	DISEASE: Erythropoietic protoporphyria (EPP) [MIM:177000]: A form of porphyria. Porphyrias are inherited defects in the biosynthesis of heme, resulting in the accumulation and increased excretion of porphyrins or porphyrin precursors. They are classified as erythropoietic or hepatic, depending on whether the enzyme deficiency occurs in red blood cells or in the liver. Erythropoietic protoporphyri…
Enocitabine	DNAP001568	2bxr-MLG	0.76	0.93	0.85	0.04	-4.6	-6.4	1.7	P21397	AOFA_HUMAN	Amine oxidase [flavin-containing] A (EC 1.4.3.4) (Monoamine oxidase type A) (MAO-A)	MAOA	Homo sapiens (Human)	1.4.3.4	['neuropathic pain', "parkinson's disease", 'depression']	DISEASE: Brunner syndrome (BRUNS) [MIM:300615]: A form of X-linked non-dysmorphic mild mental retardation. Male patients are affected by borderline mental retardation and exhibit abnormal behavior, including disturbed regulation of impulsive aggression. Obligate female carriers have normal intelligence and behavior. {ECO:0000269|PubMed:8211186}. Note=The disease is caused by mutations affecting t…
Epirubicin HCI	DAP000193	1el3-I84	0.81	0.85	0.83	0.16	-9.9	-7.7	4.8	P15121	ALDR_HUMAN	Aldose reductase (AR) (EC 1.1.1.21) (Aldehyde reductase) (Aldo-keto reductase family 1 member B1)	AKR1B1 ALDR1	Homo sapiens (Human)	1.1.1.21	['rheumatoid arthritis', 'diabetic neuropathy', 'diabetes']
Epirubicin HCI	DAP000193	1kvl-THN	0.8	0.86	0.83	0.13	-8.1	-6.8	1.2	P00811	AMPC_ECOLI	Beta-lactamase (EC 3.5.2.6) (Cephalosporinase)	ampC ampA b4150 JW4111	Escherichia coli (strain K12)	3.5.2.6	['mrsa', 'gram-positive and -negative bacterial infections', 'bacterial infections', 'serious infections', 'infection']
Epirubicin HCI	DAP000193	3ks9-Z99	0.76	0.84	0.8	0.2	-7.9	-8.4	0.9	Q13255	GRM1_HUMAN	Metabotropic glutamate receptor 1 (mGluR1)	GRM1 GPRC1A MGLUR1	Homo sapiens (Human)		['huntington disease', 'schizophrenia', 'neuropathic pain', "alzheimer's disease"]	DISEASE: Spinocerebellar ataxia, autosomal recessive, 13 (SCAR13) [MIM:614831]: Spinocerebellar ataxia is a clinically and genetically heterogeneous group of cerebellar disorders. Patients show progressive incoordination of gait and often poor coordination of hands, speech and eye movements, due to degeneration of the cerebellum with variable involvement of the brainstem and spinal cord. SCAR13 i…
Epirubicin HCI	DAP000193	3ofi-MET_GLN_ILE	0.73	0.85	0.79	0.17	-6.9	-5.3	2.2	P14735	IDE_HUMAN	Insulin-degrading enzyme (EC 3.4.24.56) (Abeta-degrading protease) (Insulin protease) (Insulinase) (Insulysin)	IDE	Homo sapiens (Human)	3.4.24.56	['bacterial infection']
Epirubicin HCI	DAP000193	3ldq-3P1	0.85	0.72	0.78	0.19	-9.4	-6.8	2.7	P11142	HSP7C_HUMAN	Heat shock cognate 71 kDa protein (Heat shock 70 kDa protein 8) (Lipopolysaccharide-associated protein 1) (LAP-1) (LPS-associated protein 1)	HSPA8 HSC70 HSP73 HSPA10	Homo sapiens (Human)		['bacterial infection']
Epirubicin HCI	DAP000193	2j91-AMP	0.85	0.71	0.78	0.1	-7	-7	4.4	P30566	PUR8_HUMAN	Adenylosuccinate lyase (ASL) (EC 4.3.2.2) (Adenylosuccinase) (ASase)	ADSL AMPS	Homo sapiens (Human)	4.3.2.2	[]	DISEASE: Adenylosuccinase deficiency (ADSL deficiency) [MIM:103050]: An autosomal recessive disorder characterized by the accumulation in the body fluids of succinylaminoimidazole-carboxamide riboside (SAICA-riboside) and succinyladenosine (S-Ado). Most children display marked psychomotor delay, often accompanied by epilepsy or autistic features, or both, although some patients may be less profou…
Erlotinib hydrochloride	DAP001010	1di9-MSQ	0.91	0.94	0.93	0.41	-6.8	-6.1	0.6	Q16539	MK14_HUMAN	Mitogen-activated protein kinase 14 (MAP kinase 14) (MAPK 14) (EC 2.7.11.24) (Cytokine suppressive anti-inflammatory drug-binding protein) (CSAID-binding protein) (CSBP) (MAP kinase MXI2) (MAX-interacting protein 2) (Mitogen-activated protein kinase p38 alpha) (MAP kinase p38 alpha) (Stress-activated protein kinase 2a) (SAPK2a)	MAPK14 CSBP CSBP1 CSBP2 CSPB1 MXI2 SAPK2A	Homo sapiens (Human)	2.7.11.24	['cardiovascular disease, copd and depression', 'pain', 'copd', 'acute lung injury & acute respiratory distress syndrome']
Erlotinib hydrochloride	DAP001010	2zm3-575	0.9	0.91	0.91	0.22	-6.7	-8.1	0.8	P08069	IGF1R_HUMAN	Insulin-like growth factor 1 receptor (EC 2.7.10.1) (Insulin-like growth factor I receptor) (IGF-I receptor) (CD antigen CD221) [Cleaved into: Insulin-like growth factor 1 receptor alpha chain; Insulin-like growth factor 1 receptor beta chain]	IGF1R	Homo sapiens (Human)	2.7.10.1	['igf-1 deficiency', 'cancer', 'various cancers, multiple myeloma', "nsclc, ewing's sarcoma and metastatic breast cancer", 'multiple myeloma', 'non-small cell lung cancer (biologic)', 'cancers', 'on-small cell lung cancer', "gastrointestinal cancers; genitourinary; ewing's sarcoma; small cell lung cancer; breast cancer (biologic)"]	DISEASE: Insulin-like growth factor 1 resistance (IGF1RES) [MIM:270450]: A disorder characterized by intrauterine growth retardation, poor postnatal growth and increased plasma IGF1 levels. {ECO:0000269|PubMed:14657428, ECO:0000269|PubMed:15928254}. Note=The disease is caused by mutations affecting the gene represented in this entry.
Erlotinib hydrochloride	DAP001010	2w1f-L0F	0.89	0.91	0.9	0.22	-7	-8.1	2	O14965	AURKA_HUMAN	Aurora kinase A (EC 2.7.11.1) (Aurora 2) (Aurora/IPL1-related kinase 1) (ARK-1) (Aurora-related kinase 1) (hARK1) (Breast tumor-amplified kinase) (Serine/threonine-protein kinase 15) (Serine/threonine-protein kinase 6) (Serine/threonine-protein kinase aurora-A)	AURKA AIK AIRK1 ARK1 AURA AYK1 BTAK IAK1 STK15 STK6	Homo sapiens (Human)	2.7.11.1	['chronic myelogenous leukemia; leukemia; lymphoblastic, acute, philadelphia-positive', 'paediatric solid tumours or all', 'advanced malignancies', 'solid tumors', 'cml that relapsed after imatinib or bcr\xe2\x80\x93abl-targeted therapy; metastatic hormone refractory prostate cancer (mhrpc)', 'leukemia, myeloid', 'ovarian cancer, fallopian cancer, peritoneal cancer', 'leukemia', 'haematological m…
Erlotinib hydrochloride	DAP001010	1oec-AA2	0.89	0.9	0.9	0.25	-7.3	-7.7	2	P21802	FGFR2_HUMAN	Fibroblast growth factor receptor 2 (FGFR-2) (EC 2.7.10.1) (K-sam) (KGFR) (Keratinocyte growth factor receptor) (CD antigen CD332)	FGFR2 BEK KGFR KSAM	Homo sapiens (Human)	2.7.10.1	['chronic hepatitis c', 'oral mucositis', 'solid tumours', 'periodontitis', 'interstitial cystitis/painful bladder syndrome']	DISEASE: Crouzon syndrome (CS) [MIM:123500]: An autosomal dominant syndrome characterized by craniosynostosis, hypertelorism, exophthalmos and external strabismus, parrot-beaked nose, short upper lip, hypoplastic maxilla, and a relative mandibular prognathism. {ECO:0000269|PubMed:10574673, ECO:0000269|PubMed:11173845, ECO:0000269|PubMed:11380921, ECO:0000269|PubMed:11781872, ECO:0000269|PubMed:75…
Erlotinib hydrochloride	DAP001010	2b37-8PS	0.88	0.9	0.89	0.26	-7	-6	3.7	P0A5Y6	INHA_MYCTU	Enoyl-[acyl-carrier-protein] reductase [NADH] (EC 1.3.1.9) (NADH-dependent enoyl-ACP reductase)	inhA Rv1484 MTCY277.05	Mycobacterium tuberculosis (strain ATCC 25618 / H37Rv)	2.5.1.86; 2.5.1.87	['tuberculosis']
Erlotinib hydrochloride	DAP001010	3apd-MMY	0.97	0.8	0.89	0.29	-7.3	-8	1.4	P48736	PK3CG_HUMAN	Phosphatidylinositol 4,5-bisphosphate 3-kinase catalytic subunit gamma isoform (PI3-kinase subunit gamma) (PI3K-gamma) (PI3Kgamma) (PtdIns-3-kinase subunit gamma) (EC 2.7.1.153) (Phosphatidylinositol 4,5-bisphosphate 3-kinase 110 kDa catalytic subunit gamma) (PtdIns-3-kinase subunit p110-gamma) (p110gamma) (Phosphoinositide-3-kinase catalytic gamma polypeptide) (Serine/threonine protein kinase PI…	PIK3CG	Homo sapiens (Human)	2.7.1.153; 2.7.11.1	['metastatic breast cancer', 'lymphoma', 'solid tumors', "advanced solid tumours; non-hodgkin's lymphoma", 'cancer', 'advanced solid tumours; advanced breast cancer', 'myeloma (see also lymphoma)', 'metastatic solid tumors', 'thrombosis', 'advanced solid tumours; metastatic breast cancer; endometrial cancer; lymphoma', 'angioedema, myocardial infarction', 'advanced solid tumours', "advanced solid…
Erlotinib hydrochloride	DAP001010	1xbb-STI	0.85	0.9	0.88	0.22	-6.4	-7.6	1.4	P43405	KSYK_HUMAN	Tyrosine-protein kinase SYK (EC 2.7.10.2) (Spleen tyrosine kinase) (p72-Syk)	SYK	Homo sapiens (Human)	2.7.10.2	["rheumatoid arthritis, thrombocytopenia, non-hodgkin's lymphoma", 'hematological malignancies', 'cancer', 'rheumatoid arthritis', 'allergic reaction, asthma', 'haematological malignancies', 'b-cell hematological malignancies', 'b-cell malignancies']
Erlotinib hydrochloride	DAP001010	2bxr-MLG	0.75	0.91	0.83	0.13	-7.4	-6.4	1.7	P21397	AOFA_HUMAN	Amine oxidase [flavin-containing] A (EC 1.4.3.4) (Monoamine oxidase type A) (MAO-A)	MAOA	Homo sapiens (Human)	1.4.3.4	['neuropathic pain', "parkinson's disease", 'depression']	DISEASE: Brunner syndrome (BRUNS) [MIM:300615]: A form of X-linked non-dysmorphic mild mental retardation. Male patients are affected by borderline mental retardation and exhibit abnormal behavior, including disturbed regulation of impulsive aggression. Obligate female carriers have normal intelligence and behavior. {ECO:0000269|PubMed:8211186}. Note=The disease is caused by mutations affecting t…
Estramustine	DAP001307	3eg9-THR_THR_ILE_PRO_MET_ASP	0.83	0.84	0.84	0.11	-6.5	-5.6	3.9	Q15436	SC23A_HUMAN	Protein transport protein Sec23A (SEC23-related protein A)	SEC23A	Homo sapiens (Human)		[]	DISEASE: Craniolenticulosutural dysplasia (CLSD) [MIM:607812]: Autosomal recessive syndrome characterized by late-closing fontanels, sutural cataracts, facial dysmorphisms and skeletal defects. {ECO:0000269|PubMed:16980979}. Note=The disease is caused by mutations affecting the gene represented in this entry.
Estramustine	DAP001307	2obv-SAM	0.79	0.85	0.82	0.14	-6.6	-5.6	2.5	Q00266	METK1_HUMAN	S-adenosylmethionine synthase isoform type-1 (AdoMet synthase 1) (EC 2.5.1.6) (Methionine adenosyltransferase 1) (MAT 1) (Methionine adenosyltransferase I/III) (MAT-I/III)	MAT1A AMS1 MATA1	Homo sapiens (Human)	2.5.1.6	[]	DISEASE: Methionine adenosyltransferase deficiency (MATD) [MIM:250850]: An inborn error of metabolism resulting in isolated hypermethioninemia. Most patients have no clinical abnormalities, although some neurologic symptoms may be present in rare cases with severe loss of methionine adenosyltransferase activity. {ECO:0000269|PubMed:10677294, ECO:0000269|PubMed:7560086, ECO:0000269|PubMed:8770875,…
Estramustine	DAP001307	3nh9-ATP	0.79	0.84	0.82	0.07	-5.9	-7.5	1.9	Q9NP58	ABCB6_HUMAN	ATP-binding cassette sub-family B member 6, mitochondrial (Mitochondrial ABC transporter 3) (Mt-ABC transporter 3) (P-glycoprotein-related protein) (Ubiquitously-expressed mammalian ABC half transporter)	ABCB6 MTABC3 PRP UMAT	Homo sapiens (Human)		[]	DISEASE: Microphthalmia, isolated, with coloboma, 7 (MCOPCB7) [MIM:614497]: A disorder of eye formation, ranging from small size of a single eye to complete bilateral absence of ocular tissues. Ocular abnormalities like opacities of the cornea and lens, scaring of the retina and choroid, and other abnormalities may also be present. Ocular colobomas are a set of malformations resulting from abnorm…
Estramustine	DAP001307	3ofi-MET_GLN_ILE	0.71	0.86	0.78	0.14	-5.5	-5.3	2.2	P14735	IDE_HUMAN	Insulin-degrading enzyme (EC 3.4.24.56) (Abeta-degrading protease) (Insulin protease) (Insulinase) (Insulysin)	IDE	Homo sapiens (Human)	3.4.24.56	['bacterial infection']
Estramustine	DAP001307	3eml-ZMA	0.69	0.84	0.76	0.06	-8.9	-7.9	2.5	P29274	AA2AR_HUMAN	Adenosine receptor A2a	ADORA2A ADORA2	Homo sapiens (Human)		['pharmacological stress agent for radionuclide imaging', 'fatigue and orthostatic hypotension', 'gastric diseases', 'schizophrenia', 'neuropathic pain', 'acute and chronic heart failure', "parkinson's disease", 'diabetic foot ulcers']
Ethinyl estradiol	DAP001018	1qkt-EST	0.9	0.92	0.91	0.68	-9.2	-9.5	0.7	P03372	ESR1_HUMAN	Estrogen receptor (ER) (ER-alpha) (Estradiol receptor) (Nuclear receptor subfamily 3 group A member 1)	ESR1 ESR NR3A1	Homo sapiens (Human)		['menopausal and postmenopausal disorders', 'first oral contraceptives', 'breast cancer and prostate cancer', 'menorrhagia', 'adrenocortical carcinoma', 'atrophic vaginitis', 'female hypogonadism', 'post-menopausal vaginal atrophy', 'female infertility', 'osteoporosis in post-menopausal women', 'antiprogestogenic', 'menopause', 'first-line advanced prostate cancer, second-line advanced prostate c…	DISEASE: Estrogen resistance (ESTRR) [MIM:615363]: A disorder characterized by partial or complete resistance to estrogens, in the presence of elevated estrogen serum levels. Clinical features include absence of the pubertal growth spurt, delayed bone maturation, unfused epiphyses, reduced bone mineral density, osteoporosis, continued growth into adulthood and very tall adult stature. Glucose int…
Ethinyl estradiol	DAP001018	1l2j-ETC	0.89	0.78	0.84	0.22	-8.8	-11.5	0.6	Q92731	ESR2_HUMAN	Estrogen receptor beta (ER-beta) (Nuclear receptor subfamily 3 group A member 2)	ESR2 ESTRB NR3A2	Homo sapiens (Human)		['chemotherapy-induced mucositis', 'vasomotor symptoms']
Ethinyl estradiol	DAP001018	3eml-ZMA	0.76	0.89	0.83	0.09	-9.4	-7.9	2.5	P29274	AA2AR_HUMAN	Adenosine receptor A2a	ADORA2A ADORA2	Homo sapiens (Human)		['pharmacological stress agent for radionuclide imaging', 'fatigue and orthostatic hypotension', 'gastric diseases', 'schizophrenia', 'neuropathic pain', 'acute and chronic heart failure', "parkinson's disease", 'diabetic foot ulcers']
Ethinyl estradiol	DAP001018	3bur-TES	0.66	0.87	0.77	0.37	-12	-13.6	1.1	P51857	AK1D1_HUMAN	3-oxo-5-beta-steroid 4-dehydrogenase (EC 1.3.1.3) (Aldo-keto reductase family 1 member D1) (Delta(4)-3-ketosteroid 5-beta-reductase) (Delta(4)-3-oxosteroid 5-beta-reductase)	AKR1D1 SRD5B1	Homo sapiens (Human)	1.3.1.3	[]	DISEASE: Congenital bile acid synthesis defect 2 (CBAS2) [MIM:235555]: A condition characterized by jaundice, intrahepatic cholestasis and hepatic failure. Patients with this liver disease show absence or low levels of chenodeoxycholic acid and cholic acid in plasma and urine. {ECO:0000269|PubMed:12970144, ECO:0000269|PubMed:15030995}. Note=The disease is caused by mutations affecting the gene re…
Floxuridine	DNAP001650	1v45-3DG	0.82	0.68	0.75	0.4	-6.8	-7.1	0.9	P00491	PNPH_HUMAN	Purine nucleoside phosphorylase (PNP) (EC 2.4.2.1) (Inosine phosphorylase) (Inosine-guanosine phosphorylase)	PNP NP	Homo sapiens (Human)	2.4.2.1	['moderate to severe plaque psoriasis', 'psoriasis, cutaneous t-cell lymphoma', 'refractory cutaneous t-cell lymphoma, b cell acute lymphoblastic leukemia']	DISEASE: Purine nucleoside phosphorylase deficiency (PNPD) [MIM:613179]: A disorder that interrupts both the catabolism of inosine into hypoxanthine and guanosine into guanine, and leads to the accumulation of guanosine, inosine, and their deoxified by-products. The main clinical presentation is recurrent infections due to severe T-cell immunodeficiency. Some patients also have neurologic impairm…
Fludarabine phosphate	DNAP001453	2bok-784	0.89	0.96	0.93	0.07	-7.5	-9.1	0.7	P00742	FA10_HUMAN	Coagulation factor X (EC 3.4.21.6) (Stuart factor) (Stuart-Prower factor) [Cleaved into: Factor X light chain; Factor X heavy chain; Activated factor Xa heavy chain]	F10	Homo sapiens (Human)	3.4.21.6	['venous thromboembolism', 'acute coronary syndromes', 'christmas disease (hemophilia b)', 'dvt; anticoagulant', 'atrial fibrillation', 'coronary disease,acs', 'thrombosis', 'venous/arterial thromboembolism', 'anticoagulant', 'prevention of stroke in patients with atrial fibrillation', 'vte prevent. in ortho, abdo. surgery, cancer patients', 'deep venous clots', 'prophylaxis of deep vein thrombos…	DISEASE: Factor X deficiency (FA10D) [MIM:227600]: A hemorrhagic disease with variable presentation. Affected individuals can manifest prolonged nasal and mucosal hemorrhage, menorrhagia, hematuria, and occasionally hemarthrosis. Some patients do not have clinical bleeding diathesis. {ECO:0000269|PubMed:10468877, ECO:0000269|PubMed:10746568, ECO:0000269|PubMed:11248282, ECO:0000269|PubMed:1172852…
Fludarabine phosphate	DNAP001453	2cgw-3C3	0.89	0.96	0.93	0.09	-6.9	-6	2.3	O14757	CHK1_HUMAN	Serine/threonine-protein kinase Chk1 (EC 2.7.11.1) (CHK1 checkpoint homolog) (Cell cycle checkpoint kinase) (Checkpoint kinase-1)	CHEK1 CHK1	Homo sapiens (Human)	2.7.11.1	['lymphoma', 'leukaemia and mds; solid tumours; lymphoma and solid tumours', 'cancer', 'rcc, melanoma and lymphoma; sclc', 'ancreatic cancer and non-small cell lung cancer', 'advanced solid tumours or lymphoma', 'solid tumors', 'solid tumors or lymphoma', 'solid tumours; advanced solid malignancies', 'pancreatic cancer', 'non-small cell lung carcinoma', 'advanced solid tumours in combination with…
Flutamide	DAP000301	2ax6-HFT	1	0.91	0.96	0.74	-8.5	-8.6	0.8	P10275	ANDR_HUMAN	Androgen receptor (Dihydrotestosterone receptor) (Nuclear receptor subfamily 3 group C member 4)	AR DHTR NR3C4	Homo sapiens (Human)		['prostate cancer', 'metastatic castration-resistant prostate cancer', 'heart failure', 'alcoholic hepatitis', 'female androgenresponsive recurrent mammary cancer', 'osteoporosis in post-menopausal women', 'castration-resistant prostate cancer', 'metastatic castration-resistant prostate cancer in patients who have received docetaxel-based chemotherapy', 'advanced prostatic cancer', 'male hypogona…	DISEASE: Androgen insensitivity syndrome (AIS) [MIM:300068]: An X-linked recessive form of pseudohermaphroditism due end-organ resistance to androgen. Affected males have female external genitalia, female breast development, blind vagina, absent uterus and female adnexa, and abdominal or inguinal testes, despite a normal 46,XY karyotype. {ECO:0000269|PubMed:10022458, ECO:0000269|PubMed:10221692, …
Fulvestrant; ICI-182, 780	DAP000319	3kku-B95	0.87	0.93	0.9	0.06	-4.4	-5	2.5	P25779	CYSP_TRYCR	Cruzipain (EC 3.4.22.51) (Cruzaine) (Major cysteine proteinase)		Trypanosoma cruzi	3.4.22.51	['p. falciparum']
Fulvestrant; ICI-182, 780	DAP000319	3cww-ALA_PRO_PRO_ALA	0.73	0.93	0.83	0.06	-5.1	-5.2	2.2	P14735	IDE_HUMAN	Insulin-degrading enzyme (EC 3.4.24.56) (Abeta-degrading protease) (Insulin protease) (Insulinase) (Insulysin)	IDE	Homo sapiens (Human)	3.4.24.56	['bacterial infection']
Gefitinib	DAP000657	2h8h-H8H	0.86	0.83	0.85	0.38	-8.7	-9.8	1.4	P12931	SRC_HUMAN	Proto-oncogene tyrosine-protein kinase Src (EC 2.7.10.2) (Proto-oncogene c-Src) (pp60c-src) (p60-Src)	SRC SRC1	Homo sapiens (Human)	2.7.10.2	['advanced breast cancer', 'cancer', 'acute myeloid leukemia', 'chronic myelogenous leukemia', 'osteosarcoma; hematological malignancies, solid tumours', 'solid tumours, multiple myeloma', 'aml, cml']	DISEASE: Note=SRC kinase activity has been shown to be increased in several tumor tissues and tumor cell lines such as colon carcinoma cells.
Gefitinib	DAP000657	3lxp-IZA	0.92	0.72	0.82	0.16	-8.9	-11.3	0.2	P29597	TYK2_HUMAN	Non-receptor tyrosine-protein kinase TYK2 (EC 2.7.10.2)	TYK2	Homo sapiens (Human)	2.7.10.2	['solid tumors']	DISEASE: Immunodeficiency 35 (IMD35) [MIM:611521]: A primary immunodeficiency characterized by recurrent skin abscesses, pneumonia, and highly elevated serum IgE. {ECO:0000269|PubMed:17088085}. Note=The disease is caused by mutations affecting the gene represented in this entry.
Gefitinib	DAP000657	2vwu-7X1	0.92	0.71	0.82	0.52	-8	-9.2	1.5	P54760	EPHB4_HUMAN	Ephrin type-B receptor 4 (EC 2.7.10.1) (Hepatoma transmembrane kinase) (Tyrosine-protein kinase TYRO11)	EPHB4 HTK MYK1 TYRO11	Homo sapiens (Human)	2.7.10.1	['carcinoma, non-small-cell lung', 'cancer']
Gefitinib	DAP000657	2v4l-ABJ	0.82	0.76	0.79	0.13	-7.9	-7.8	0.2	P48736	PK3CG_HUMAN	Phosphatidylinositol 4,5-bisphosphate 3-kinase catalytic subunit gamma isoform (PI3-kinase subunit gamma) (PI3K-gamma) (PI3Kgamma) (PtdIns-3-kinase subunit gamma) (EC 2.7.1.153) (Phosphatidylinositol 4,5-bisphosphate 3-kinase 110 kDa catalytic subunit gamma) (PtdIns-3-kinase subunit p110-gamma) (p110gamma) (Phosphoinositide-3-kinase catalytic gamma polypeptide) (Serine/threonine protein kinase PI…	PIK3CG	Homo sapiens (Human)	2.7.1.153; 2.7.11.1	['metastatic breast cancer', 'lymphoma', 'solid tumors', "advanced solid tumours; non-hodgkin's lymphoma", 'cancer', 'advanced solid tumours; advanced breast cancer', 'myeloma (see also lymphoma)', 'metastatic solid tumors', 'thrombosis', 'advanced solid tumours; metastatic breast cancer; endometrial cancer; lymphoma', 'angioedema, myocardial infarction', 'advanced solid tumours', "advanced solid…
Gefitinib	DAP000657	3f5p-741	0.87	0.71	0.79	0.38	-7.4	-6.7	1.7	P08069	IGF1R_HUMAN	Insulin-like growth factor 1 receptor (EC 2.7.10.1) (Insulin-like growth factor I receptor) (IGF-I receptor) (CD antigen CD221) [Cleaved into: Insulin-like growth factor 1 receptor alpha chain; Insulin-like growth factor 1 receptor beta chain]	IGF1R	Homo sapiens (Human)	2.7.10.1	['igf-1 deficiency', 'cancer', 'various cancers, multiple myeloma', "nsclc, ewing's sarcoma and metastatic breast cancer", 'multiple myeloma', 'non-small cell lung cancer (biologic)', 'cancers', 'on-small cell lung cancer', "gastrointestinal cancers; genitourinary; ewing's sarcoma; small cell lung cancer; breast cancer (biologic)"]	DISEASE: Insulin-like growth factor 1 resistance (IGF1RES) [MIM:270450]: A disorder characterized by intrauterine growth retardation, poor postnatal growth and increased plasma IGF1 levels. {ECO:0000269|PubMed:14657428, ECO:0000269|PubMed:15928254}. Note=The disease is caused by mutations affecting the gene represented in this entry.
Gefitinib	DAP000657	1qcf-PP1	0.77	0.79	0.78	0.14	-8.6	-9.2	0.6	P08631	HCK_HUMAN	Tyrosine-protein kinase HCK (EC 2.7.10.2) (Hematopoietic cell kinase) (Hemopoietic cell kinase) (p59-HCK/p60-HCK) (p59Hck) (p61Hck)	HCK	Homo sapiens (Human)	2.7.10.2	[]	DISEASE: Note=Aberrant activation of HCK by HIV-1 protein Nef enhances HIV-1 replication and contributes to HIV-1 pathogenicity.; DISEASE: Note=Aberrant activation of HCK, e.g. by the BCR-ABL fusion protein, promotes cancer cell proliferation.
Gefitinib	DAP000657	2xne-ASH	0.84	0.7	0.77	0.33	-7.6	-8.1	2.4	O14965	AURKA_HUMAN	Aurora kinase A (EC 2.7.11.1) (Aurora 2) (Aurora/IPL1-related kinase 1) (ARK-1) (Aurora-related kinase 1) (hARK1) (Breast tumor-amplified kinase) (Serine/threonine-protein kinase 15) (Serine/threonine-protein kinase 6) (Serine/threonine-protein kinase aurora-A)	AURKA AIK AIRK1 ARK1 AURA AYK1 BTAK IAK1 STK15 STK6	Homo sapiens (Human)	2.7.11.1	['chronic myelogenous leukemia; leukemia; lymphoblastic, acute, philadelphia-positive', 'paediatric solid tumours or all', 'advanced malignancies', 'solid tumors', 'cml that relapsed after imatinib or bcr\xe2\x80\x93abl-targeted therapy; metastatic hormone refractory prostate cancer (mhrpc)', 'leukemia, myeloid', 'ovarian cancer, fallopian cancer, peritoneal cancer', 'leukemia', 'haematological m…
Gefitinib	DAP000657	1di9-MSQ	0.75	0.78	0.77	0.33	-7	-6.1	0.6	Q16539	MK14_HUMAN	Mitogen-activated protein kinase 14 (MAP kinase 14) (MAPK 14) (EC 2.7.11.24) (Cytokine suppressive anti-inflammatory drug-binding protein) (CSAID-binding protein) (CSBP) (MAP kinase MXI2) (MAX-interacting protein 2) (Mitogen-activated protein kinase p38 alpha) (MAP kinase p38 alpha) (Stress-activated protein kinase 2a) (SAPK2a)	MAPK14 CSBP CSBP1 CSBP2 CSPB1 MXI2 SAPK2A	Homo sapiens (Human)	2.7.11.24	['cardiovascular disease, copd and depression', 'pain', 'copd', 'acute lung injury & acute respiratory distress syndrome']
Gefitinib	DAP000657	3kvx-FMY	0.72	0.77	0.75	0.29	-8.2	-10.2	1.2	P53779	MK10_HUMAN	Mitogen-activated protein kinase 10 (MAP kinase 10) (MAPK 10) (EC 2.7.11.24) (MAP kinase p49 3F12) (Stress-activated protein kinase 1b) (SAPK1b) (Stress-activated protein kinase JNK3) (c-Jun N-terminal kinase 3)	MAPK10 JNK3 JNK3A PRKM10 SAPK1B	Homo sapiens (Human)	2.7.11.24	[]	DISEASE: Note=A chromosomal aberration involving MAPK10 has been found in a single patient with pharmacoresistant epileptic encephalopathy. Translocation t(Y;4)(q11.2;q21) which causes MAPK10 truncation. {ECO:0000269|PubMed:16249883}.
Gefitinib	DAP000657	1xbb-STI	0.69	0.77	0.73	0.25	-6.9	-7.6	1.4	P43405	KSYK_HUMAN	Tyrosine-protein kinase SYK (EC 2.7.10.2) (Spleen tyrosine kinase) (p72-Syk)	SYK	Homo sapiens (Human)	2.7.10.2	["rheumatoid arthritis, thrombocytopenia, non-hodgkin's lymphoma", 'hematological malignancies', 'cancer', 'rheumatoid arthritis', 'allergic reaction, asthma', 'haematological malignancies', 'b-cell hematological malignancies', 'b-cell malignancies']
Gefitinib	DAP000657	2ijm-ATP	0.68	0.76	0.72	0.06	-7.6	-7.6	1.9	Q05397	FAK1_HUMAN	Focal adhesion kinase 1 (FADK 1) (EC 2.7.10.2) (Focal adhesion kinase-related nonkinase) (FRNK) (Protein phosphatase 1 regulatory subunit 71) (PPP1R71) (Protein-tyrosine kinase 2) (p125FAK) (pp125FAK)	PTK2 FAK FAK1	Homo sapiens (Human)	2.7.10.2	[]	DISEASE: Note=Aberrant PTK2/FAK1 expression may play a role in cancer cell proliferation, migration and invasion, in tumor formation and metastasis. PTK2/FAK1 overexpression is seen in many types of cancer.
Gefitinib	DAP000657	2nsd-4PI	0.66	0.77	0.72	0.13	-8	-10.4	1.3	P0A5Y6	INHA_MYCTU	Enoyl-[acyl-carrier-protein] reductase [NADH] (EC 1.3.1.9) (NADH-dependent enoyl-ACP reductase)	inhA Rv1484 MTCY277.05	Mycobacterium tuberculosis (strain ATCC 25618 / H37Rv)	2.5.1.86; 2.5.1.87	['tuberculosis']
Gemcitabine HCl	DAP001246	1rfg-GMP	0.92	0.85	0.89	0.33	-7.6	-8.1	1.2	P00491	PNPH_HUMAN	Purine nucleoside phosphorylase (PNP) (EC 2.4.2.1) (Inosine phosphorylase) (Inosine-guanosine phosphorylase)	PNP NP	Homo sapiens (Human)	2.4.2.1	['moderate to severe plaque psoriasis', 'psoriasis, cutaneous t-cell lymphoma', 'refractory cutaneous t-cell lymphoma, b cell acute lymphoblastic leukemia']	DISEASE: Purine nucleoside phosphorylase deficiency (PNPD) [MIM:613179]: A disorder that interrupts both the catabolism of inosine into hypoxanthine and guanosine into guanine, and leads to the accumulation of guanosine, inosine, and their deoxified by-products. The main clinical presentation is recurrent infections due to severe T-cell immunodeficiency. Some patients also have neurologic impairm…
Gemcitabine HCl	DAP001246	3lbz-Z89	0.79	0.91	0.85	0.05	-4.1	-4.7	2.9	P41182	BCL6_HUMAN	B-cell lymphoma 6 protein (BCL-6) (B-cell lymphoma 5 protein) (BCL-5) (Protein LAZ-3) (Zinc finger and BTB domain-containing protein 27) (Zinc finger protein 51)	BCL6 BCL5 LAZ3 ZBTB27 ZNF51	Homo sapiens (Human)		[]	DISEASE: Note=Chromosomal aberrations involving BCL6 are a cause of B-cell non-Hodgkin lymphomas (B-cell NHL), including diffuse large B-cell lymphoma and follicular lymphoma. Approximately 40% of diffuse large B-cell lymphomas and 5 to 10% of follicular lymphomas are associated with chromosomal translocations that deregulate expression of BCL6 by juxtaposing heterologous promoters to the BCL6 co…
Gemcitabine HCl	DAP001246	3cas-ASD	0.74	0.91	0.83	0.1	-8.3	-13.4	0.9	P51857	AK1D1_HUMAN	3-oxo-5-beta-steroid 4-dehydrogenase (EC 1.3.1.3) (Aldo-keto reductase family 1 member D1) (Delta(4)-3-ketosteroid 5-beta-reductase) (Delta(4)-3-oxosteroid 5-beta-reductase)	AKR1D1 SRD5B1	Homo sapiens (Human)	1.3.1.3	[]	DISEASE: Congenital bile acid synthesis defect 2 (CBAS2) [MIM:235555]: A condition characterized by jaundice, intrahepatic cholestasis and hepatic failure. Patients with this liver disease show absence or low levels of chenodeoxycholic acid and cholic acid in plasma and urine. {ECO:0000269|PubMed:12970144, ECO:0000269|PubMed:15030995}. Note=The disease is caused by mutations affecting the gene re…
Gemcitabine HCl	DAP001246	2ano-817	0.73	0.92	0.83	0.07	-5.6	-7	1.8	P0ABQ4	DYR_ECOLI	Dihydrofolate reductase (EC 1.5.1.3)	folA tmrA b0048 JW0047	Escherichia coli (strain K12)	1.5.1.3	['gram-positive and -negative bacterial infections', 'malaria and bacterial infections', 'malaria', 'leukemia', 'plasmodium falciparum', 'peripheral t cell lymphoma', 'bacterial infections', 'urinary tract infections', 'acute malaria', 'pneumocystis pneumonia (pcp)', 'advanced cancer']
Gemcitabine HCl	DAP001246	2nw4-8NH	0.88	0.76	0.82	0.1	-7.6	-8.8	0.4	P15207	ANDR_RAT	Androgen receptor (Dihydrotestosterone receptor) (Nuclear receptor subfamily 3 group C member 4)	Ar Nr3c4	Rattus norvegicus (Rat)		[]	DISEASE: Note=Defects in Ar are a cause of androgen insensitivity. Rats with this syndrome are called testicular feminized (TFM).
Hydroxyprogesterone	DNAP001656	3cav-CI2	0.86	0.74	0.8	0.42	-8.5	-9.8	0.9	P51857	AK1D1_HUMAN	3-oxo-5-beta-steroid 4-dehydrogenase (EC 1.3.1.3) (Aldo-keto reductase family 1 member D1) (Delta(4)-3-ketosteroid 5-beta-reductase) (Delta(4)-3-oxosteroid 5-beta-reductase)	AKR1D1 SRD5B1	Homo sapiens (Human)	1.3.1.3	[]	DISEASE: Congenital bile acid synthesis defect 2 (CBAS2) [MIM:235555]: A condition characterized by jaundice, intrahepatic cholestasis and hepatic failure. Patients with this liver disease show absence or low levels of chenodeoxycholic acid and cholic acid in plasma and urine. {ECO:0000269|PubMed:12970144, ECO:0000269|PubMed:15030995}. Note=The disease is caused by mutations affecting the gene re…
Idarubicin hydrochloride	DAP000050	1el3-I84	0.85	0.84	0.85	0.18	-9.8	-7.7	4.8	P15121	ALDR_HUMAN	Aldose reductase (AR) (EC 1.1.1.21) (Aldehyde reductase) (Aldo-keto reductase family 1 member B1)	AKR1B1 ALDR1	Homo sapiens (Human)	1.1.1.21	['rheumatoid arthritis', 'diabetic neuropathy', 'diabetes']
Idarubicin hydrochloride	DAP000050	2pu2-DK2	0.87	0.78	0.83	0.23	-7.5	-7.9	0.8	P00811	AMPC_ECOLI	Beta-lactamase (EC 3.5.2.6) (Cephalosporinase)	ampC ampA b4150 JW4111	Escherichia coli (strain K12)	3.5.2.6	['mrsa', 'gram-positive and -negative bacterial infections', 'bacterial infections', 'serious infections', 'infection']
Idarubicin hydrochloride	DAP000050	3ofi-MET_GLN_ILE	0.79	0.82	0.8	0.17	-7.7	-5.3	2.2	P14735	IDE_HUMAN	Insulin-degrading enzyme (EC 3.4.24.56) (Abeta-degrading protease) (Insulin protease) (Insulinase) (Insulysin)	IDE	Homo sapiens (Human)	3.4.24.56	['bacterial infection']
Idarubicin hydrochloride	DAP000050	1kvk-ATP	0.76	0.84	0.8	0.12	-8.1	-7.8	2.3	P17256	KIME_RAT	Mevalonate kinase (MK) (EC 2.7.1.36)	Mvk	Rattus norvegicus (Rat)	2.7.1.36	[]	DISEASE: Note=Mutation in the mevalonate kinase gene causes mevalonicaciduria.
Imatinib mesilate; CGP5714B; glivec; STI571	DAP000179	1xbb-STI	0.99	0.98	0.99	1	-8.3	-7.6	1.4	P43405	KSYK_HUMAN	Tyrosine-protein kinase SYK (EC 2.7.10.2) (Spleen tyrosine kinase) (p72-Syk)	SYK	Homo sapiens (Human)	2.7.10.2	["rheumatoid arthritis, thrombocytopenia, non-hodgkin's lymphoma", 'hematological malignancies', 'cancer', 'rheumatoid arthritis', 'allergic reaction, asthma', 'haematological malignancies', 'b-cell hematological malignancies', 'b-cell malignancies']
Imatinib mesilate; CGP5714B; glivec; STI571	DAP000179	2bdj-HET	0.96	0.98	0.97	0.26	-9	-10.1	1.4	P12931	SRC_HUMAN	Proto-oncogene tyrosine-protein kinase Src (EC 2.7.10.2) (Proto-oncogene c-Src) (pp60c-src) (p60-Src)	SRC SRC1	Homo sapiens (Human)	2.7.10.2	['advanced breast cancer', 'cancer', 'acute myeloid leukemia', 'chronic myelogenous leukemia', 'osteosarcoma; hematological malignancies, solid tumours', 'solid tumours, multiple myeloma', 'aml, cml']	DISEASE: Note=SRC kinase activity has been shown to be increased in several tumor tissues and tumor cell lines such as colon carcinoma cells.
Imatinib mesilate; CGP5714B; glivec; STI571	DAP000179	3gvu-STI	0.97	0.93	0.95	1	-12	-13.5	0.4	P42684	ABL2_HUMAN	Abelson tyrosine-protein kinase 2 (EC 2.7.10.2) (Abelson murine leukemia viral oncogene homolog 2) (Abelson-related gene protein) (Tyrosine-protein kinase ARG)	ABL2 ABLL ARG	Homo sapiens (Human)	2.7.10.2	['advanced breast cancer', 'intestinal cancer & myeloid leukemia', 'dietary shortage', 'chronic myelogenous leukemia', 'leukemia', 'osteosarcoma; hematological malignancies, solid tumours', 'all, cml, gist', 'solid tumours, multiple myeloma', 'glioma, lung, prostate, solid tumours']
Imatinib mesilate; CGP5714B; glivec; STI571	DAP000179	1qcf-PP1	0.94	0.94	0.94	0.13	-8.9	-9.2	0.6	P08631	HCK_HUMAN	Tyrosine-protein kinase HCK (EC 2.7.10.2) (Hematopoietic cell kinase) (Hemopoietic cell kinase) (p59-HCK/p60-HCK) (p59Hck) (p61Hck)	HCK	Homo sapiens (Human)	2.7.10.2	[]	DISEASE: Note=Aberrant activation of HCK by HIV-1 protein Nef enhances HIV-1 replication and contributes to HIV-1 pathogenicity.; DISEASE: Note=Aberrant activation of HCK, e.g. by the BCR-ABL fusion protein, promotes cancer cell proliferation.
Imatinib mesilate; CGP5714B; glivec; STI571	DAP000179	3dtc-VIN	0.92	0.95	0.94	0.21	-10.2	-12.1	0.7	P80192	M3K9_HUMAN	Mitogen-activated protein kinase kinase kinase 9 (EC 2.7.11.25) (Mixed lineage kinase 1)	MAP3K9 MLK1 PRKE1	Homo sapiens (Human)	2.7.11.25	[]	DISEASE: Note=May play a role in esophageal cancer susceptibility and/or development.
Imatinib mesilate; CGP5714B; glivec; STI571	DAP000179	2hyy-STI	0.9	0.94	0.92	1	-11.7	-12.7	1	P00519	ABL1_HUMAN	Tyrosine-protein kinase ABL1 (EC 2.7.10.2) (Abelson murine leukemia viral oncogene homolog 1) (Abelson tyrosine-protein kinase 1) (Proto-oncogene c-Abl) (p150)	ABL1 ABL JTK7	Homo sapiens (Human)	2.7.10.2	['advanced breast cancer', 'intestinal cancer & myeloid leukemia', 'dietary shortage', 'chronic myelogenous leukemia', 'leukemia', 'chronic, accelerated or blast-phase chronic myeloid leukaemia', 'osteosarcoma; hematological malignancies, solid tumours', 'all, cml, gist', 'solid tumours, multiple myeloma', 'glioma, lung, prostate, solid tumours']	DISEASE: Leukemia, chronic myeloid (CML) [MIM:608232]: A clonal myeloproliferative disorder of a pluripotent stem cell with a specific cytogenetic abnormality, the Philadelphia chromosome (Ph), involving myeloid, erythroid, megakaryocytic, B-lymphoid, and sometimes T-lymphoid cells, but not marrow fibroblasts. Note=The gene represented in this entry is involved in disease pathogenesis.; DISEASE: …
Imatinib mesilate; CGP5714B; glivec; STI571	DAP000179	2o0u-C0M	0.9	0.93	0.92	0.26	-9.8	-11.8	1.2	P53779	MK10_HUMAN	Mitogen-activated protein kinase 10 (MAP kinase 10) (MAPK 10) (EC 2.7.11.24) (MAP kinase p49 3F12) (Stress-activated protein kinase 1b) (SAPK1b) (Stress-activated protein kinase JNK3) (c-Jun N-terminal kinase 3)	MAPK10 JNK3 JNK3A PRKM10 SAPK1B	Homo sapiens (Human)	2.7.11.24	[]	DISEASE: Note=A chromosomal aberration involving MAPK10 has been found in a single patient with pharmacoresistant epileptic encephalopathy. Translocation t(Y;4)(q11.2;q21) which causes MAPK10 truncation. {ECO:0000269|PubMed:16249883}.
Imatinib mesilate; CGP5714B; glivec; STI571	DAP000179	2xru-400	0.97	0.86	0.92	0.42	-9.6	-9.4	0.8	O14965	AURKA_HUMAN	Aurora kinase A (EC 2.7.11.1) (Aurora 2) (Aurora/IPL1-related kinase 1) (ARK-1) (Aurora-related kinase 1) (hARK1) (Breast tumor-amplified kinase) (Serine/threonine-protein kinase 15) (Serine/threonine-protein kinase 6) (Serine/threonine-protein kinase aurora-A)	AURKA AIK AIRK1 ARK1 AURA AYK1 BTAK IAK1 STK15 STK6	Homo sapiens (Human)	2.7.11.1	['chronic myelogenous leukemia; leukemia; lymphoblastic, acute, philadelphia-positive', 'paediatric solid tumours or all', 'advanced malignancies', 'solid tumors', 'cml that relapsed after imatinib or bcr\xe2\x80\x93abl-targeted therapy; metastatic hormone refractory prostate cancer (mhrpc)', 'leukemia, myeloid', 'ovarian cancer, fallopian cancer, peritoneal cancer', 'leukemia', 'haematological m…
Imatinib mesilate; CGP5714B; glivec; STI571	DAP000179	3nga-3NG	0.9	0.93	0.92	0.29	-8.7	-10.9	0.4	P68400	CSK21_HUMAN	Casein kinase II subunit alpha (CK II alpha) (EC 2.7.11.1)	CSNK2A1 CK2A1	Homo sapiens (Human)	2.7.11.1	['solid tumors', 'multiple myeloma']
Imatinib mesilate; CGP5714B; glivec; STI571	DAP000179	3roc-29A	0.89	0.93	0.91	0.25	-8.9	-9.4	0.6	Q16539	MK14_HUMAN	Mitogen-activated protein kinase 14 (MAP kinase 14) (MAPK 14) (EC 2.7.11.24) (Cytokine suppressive anti-inflammatory drug-binding protein) (CSAID-binding protein) (CSBP) (MAP kinase MXI2) (MAX-interacting protein 2) (Mitogen-activated protein kinase p38 alpha) (MAP kinase p38 alpha) (Stress-activated protein kinase 2a) (SAPK2a)	MAPK14 CSBP CSBP1 CSBP2 CSPB1 MXI2 SAPK2A	Homo sapiens (Human)	2.7.11.24	['cardiovascular disease, copd and depression', 'pain', 'copd', 'acute lung injury & acute respiratory distress syndrome']
Imatinib mesilate; CGP5714B; glivec; STI571	DAP000179	1gii-1PU	0.81	0.93	0.87	0.23	-9.5	-9.3	0.9	P24941	CDK2_HUMAN	Cyclin-dependent kinase 2 (EC 2.7.11.22) (Cell division protein kinase 2) (p33 protein kinase)	CDK2 CDKN2	Homo sapiens (Human)	2.7.11.22	['advanced solid tumors', 'solid tumors', 'advanced breast cancer, nsclc, acute leukaemia and lymphoma', 'breast, nsclc, lymphoid leukemia, glomerulonephritis & multiple myeloma', 'advanced solid tumours', 'b-lymphoid malignancies and advanced solid tumours', 'chronic lymphocytic leukemia', 'neoplasms, advanced solid tumours', 'hepatocellular carcinoma', 'advanced solid tumours, nhl, multiple mye…
Irinotecan hydrochloride; CPT-11	DAP000647	3f8s-PF2	0.78	0.67	0.73	0.12	-7.8	-8.2	1.9	P27487	DPP4_HUMAN	Dipeptidyl peptidase 4 (EC 3.4.14.5) (ADABP) (Adenosine deaminase complexing protein 2) (ADCP-2) (Dipeptidyl peptidase IV) (DPP IV) (T-cell activation antigen CD26) (TP103) (CD antigen CD26) [Cleaved into: Dipeptidyl peptidase 4 membrane form (Dipeptidyl peptidase IV membrane form); Dipeptidyl peptidase 4 soluble form (Dipeptidyl peptidase IV soluble form)]	DPP4 ADCP2 CD26	Homo sapiens (Human)	3.4.14.5	['diabetes mellitus', 'type 2 diabetes', 'diabetes mellitus type ii', 'diabetes', 'hyperglycaemia in type 2 diabetes mellitus']
Irinotecan hydrochloride; CPT-11	DAP000647	2y0j-AXC	0.79	0.66	0.73	0.12	-7.6	-8.1	1.1	Q9Y233	PDE10_HUMAN	cAMP and cAMP-inhibited cGMP 3',5'-cyclic phosphodiesterase 10A (EC 3.1.4.17) (EC 3.1.4.35)	PDE10A	Homo sapiens (Human)	3.1.4.17; 3.1.4.35	['schizoaffective disorder, schizophrenia', 'schizophrenia']
Irinotecan hydrochloride; CPT-11	DAP000647	2x6d-X6D	0.77	0.66	0.72	0.23	-10.3	-9.9	1.3	O14965	AURKA_HUMAN	Aurora kinase A (EC 2.7.11.1) (Aurora 2) (Aurora/IPL1-related kinase 1) (ARK-1) (Aurora-related kinase 1) (hARK1) (Breast tumor-amplified kinase) (Serine/threonine-protein kinase 15) (Serine/threonine-protein kinase 6) (Serine/threonine-protein kinase aurora-A)	AURKA AIK AIRK1 ARK1 AURA AYK1 BTAK IAK1 STK15 STK6	Homo sapiens (Human)	2.7.11.1	['chronic myelogenous leukemia; leukemia; lymphoblastic, acute, philadelphia-positive', 'paediatric solid tumours or all', 'advanced malignancies', 'solid tumors', 'cml that relapsed after imatinib or bcr\xe2\x80\x93abl-targeted therapy; metastatic hormone refractory prostate cancer (mhrpc)', 'leukemia, myeloid', 'ovarian cancer, fallopian cancer, peritoneal cancer', 'leukemia', 'haematological m…
Lapatinib; lapatanib; GW2016; GSK572016	DAP000853	3s2a-2NQ	0.96	0.88	0.92	0.36	-8.8	-10.4	0.6	P48736	PK3CG_HUMAN	Phosphatidylinositol 4,5-bisphosphate 3-kinase catalytic subunit gamma isoform (PI3-kinase subunit gamma) (PI3K-gamma) (PI3Kgamma) (PtdIns-3-kinase subunit gamma) (EC 2.7.1.153) (Phosphatidylinositol 4,5-bisphosphate 3-kinase 110 kDa catalytic subunit gamma) (PtdIns-3-kinase subunit p110-gamma) (p110gamma) (Phosphoinositide-3-kinase catalytic gamma polypeptide) (Serine/threonine protein kinase PI…	PIK3CG	Homo sapiens (Human)	2.7.1.153; 2.7.11.1	['metastatic breast cancer', 'lymphoma', 'solid tumors', "advanced solid tumours; non-hodgkin's lymphoma", 'cancer', 'advanced solid tumours; advanced breast cancer', 'myeloma (see also lymphoma)', 'metastatic solid tumors', 'thrombosis', 'advanced solid tumours; metastatic breast cancer; endometrial cancer; lymphoma', 'angioedema, myocardial infarction', 'advanced solid tumours', "advanced solid…
Lapatinib; lapatanib; GW2016; GSK572016	DAP000853	3ofi-MET_GLN_ILE	0.9	0.93	0.92	0.05	-6.5	-5.3	2.2	P14735	IDE_HUMAN	Insulin-degrading enzyme (EC 3.4.24.56) (Abeta-degrading protease) (Insulin protease) (Insulinase) (Insulysin)	IDE	Homo sapiens (Human)	3.4.24.56	['bacterial infection']
Lapatinib; lapatanib; GW2016; GSK572016	DAP000853	3n6k-BFH	0.86	0.93	0.9	0.13	-7.2	-7.6	1.1	P14324	FPPS_HUMAN	Farnesyl pyrophosphate synthase (FPP synthase) (FPS) (EC 2.5.1.10) ((2E,6E)-farnesyl diphosphate synthase) (Dimethylallyltranstransferase) (EC 2.5.1.1) (Farnesyl diphosphate synthase) (Geranyltranstransferase)	FDPS FPS KIAA1293	Homo sapiens (Human)	2.5.1.10; 2.5.1.1	["osteoporosis and paget's disease", 'postmenopausal osteoporosis', 'osteoporosis in post-menopausal women', 'hypercalcemia', "paget's disease", 'osteoporosis']
Lapatinib; lapatanib; GW2016; GSK572016	DAP000853	2yej-XQK	0.83	0.93	0.88	0.06	-7.7	-5.5	1	P07900	HS90A_HUMAN	Heat shock protein HSP 90-alpha (Heat shock 86 kDa) (HSP 86) (HSP86) (Lipopolysaccharide-associated protein 2) (LAP-2) (LPS-associated protein 2) (Renal carcinoma antigen NY-REN-38)	HSP90AA1 HSP90A HSPC1 HSPCA	Homo sapiens (Human)		['breast cancer, melanoma', 'solid tumors', 'ovarian cancer, refractory hematological malignancies', 'solid tumors, chronic myelogenous leukemia', 'refractory acute myelogenous leukemia; her2-positive metastatic breast cancer and leukaemia', 'gastrointestinal stromal tumors', 'multiple myeloma', 'non-small cell lung cancer', 'hematological malignancies', 'cancer/tumors', 'prostate cancer']
Lapatinib; lapatanib; GW2016; GSK572016	DAP000853	3ox3-4X4	0.82	0.94	0.88	0.25	-10.7	-10.2	1.8	P16083	NQO2_HUMAN	Ribosyldihydronicotinamide dehydrogenase [quinone] (EC 1.10.99.2) (NRH dehydrogenase [quinone] 2) (NRH:quinone oxidoreductase 2) (Quinone reductase 2) (QR2)	NQO2 NMOR2	Homo sapiens (Human)	1.10.99.2	['cancer/tumors']
Lapatinib; lapatanib; GW2016; GSK572016	DAP000853	3iad-15X	0.96	0.74	0.85	0.25	-9.8	-11.1	1.1	Q08499	PDE4D_HUMAN	cAMP-specific 3',5'-cyclic phosphodiesterase 4D (EC 3.1.4.53) (DPDE3) (PDE43)	PDE4D DPDE3	Homo sapiens (Human)	3.1.4.53	['psoriasis', 'atopic dermatitis', 'psoriasis and psoriatic disorders', 'emphysema, bronchitis, chronic obstructive pulmonary disease', 'chronic obstructive pulmonary disease', 'atopic dermatitis (ad)', 'cough']	DISEASE: Note=Genetic variations in PDE4D might be associated with susceptibility to stroke. PubMed:17006457 states that association with stroke has to be considered with caution.; DISEASE: Acrodysostosis 2, with or without hormone resistance (ACRDYS2) [MIM:614613]: A pleiotropic disorder characterized by skeletal, endocrine, and neurological abnormalities. Skeletal features include brachycephaly…
Methotrexate	DNC000933	3k8q-22A	0.8	0.72	0.76	0.14	-7.4	-6.4	1	P00491	PNPH_HUMAN	Purine nucleoside phosphorylase (PNP) (EC 2.4.2.1) (Inosine phosphorylase) (Inosine-guanosine phosphorylase)	PNP NP	Homo sapiens (Human)	2.4.2.1	['moderate to severe plaque psoriasis', 'psoriasis, cutaneous t-cell lymphoma', 'refractory cutaneous t-cell lymphoma, b cell acute lymphoblastic leukemia']	DISEASE: Purine nucleoside phosphorylase deficiency (PNPD) [MIM:613179]: A disorder that interrupts both the catabolism of inosine into hypoxanthine and guanosine into guanine, and leads to the accumulation of guanosine, inosine, and their deoxified by-products. The main clinical presentation is recurrent infections due to severe T-cell immunodeficiency. Some patients also have neurologic impairm…
Methotrexate	DNC000933	3pls-ANP	0.71	0.77	0.74	0.08	-7.7	-8.2	2.8	Q04912	RON_HUMAN	Macrophage-stimulating protein receptor (MSP receptor) (EC 2.7.10.1) (CDw136) (Protein-tyrosine kinase 8) (p185-Ron) (CD antigen CD136) [Cleaved into: Macrophage-stimulating protein receptor alpha chain; Macrophage-stimulating protein receptor beta chain]	MST1R PTK8 RON	Homo sapiens (Human)	2.7.10.1	['cancer']
Methotrexate	DNC000933	2ye8-2D3	0.71	0.76	0.74	0.08	-6.8	-5.9	1.5	P07900	HS90A_HUMAN	Heat shock protein HSP 90-alpha (Heat shock 86 kDa) (HSP 86) (HSP86) (Lipopolysaccharide-associated protein 2) (LAP-2) (LPS-associated protein 2) (Renal carcinoma antigen NY-REN-38)	HSP90AA1 HSP90A HSPC1 HSPCA	Homo sapiens (Human)		['breast cancer, melanoma', 'solid tumors', 'ovarian cancer, refractory hematological malignancies', 'solid tumors, chronic myelogenous leukemia', 'refractory acute myelogenous leukemia; her2-positive metastatic breast cancer and leukaemia', 'gastrointestinal stromal tumors', 'multiple myeloma', 'non-small cell lung cancer', 'hematological malignancies', 'cancer/tumors', 'prostate cancer']
Nandrolone phenpropionate	DNAP001665	1i3l-GDU	0.97	0.89	0.93	0.08	-9.5	-9.5	0.8	Q14376	GALE_HUMAN	UDP-glucose 4-epimerase (EC 5.1.3.2) (Galactowaldenase) (UDP-N-acetylgalactosamine 4-epimerase) (UDP-GalNAc 4-epimerase) (UDP-N-acetylglucosamine 4-epimerase) (UDP-GlcNAc 4-epimerase) (EC 5.1.3.7) (UDP-galactose 4-epimerase)	GALE	Homo sapiens (Human)	5.1.3.2; 5.1.3.7	[]	DISEASE: Epimerase-deficiency galactosemia (EDG) [MIM:230350]: Clinical features include early-onset cataracts, liver damage, deafness and mental retardation. There are two clinically distinct forms of EDG. (1) A benign, or 'peripheral' form with no detectable GALE activity in red blood cells and characterized by mild symptoms. Some patients may suffer no symptoms beyond raised levels of galactos…
Nandrolone phenpropionate	DNAP001665	1r0p-KSA	0.98	0.85	0.92	0.15	-9.3	-6.3	1.9	P08581	MET_HUMAN	Hepatocyte growth factor receptor (HGF receptor) (EC 2.7.10.1) (HGF/SF receptor) (Proto-oncogene c-Met) (Scatter factor receptor) (SF receptor) (Tyrosine-protein kinase Met)	MET	Homo sapiens (Human)	2.7.10.1	['solid tumours', '1st line squamous non-small cell lung cancer', 'advanced malignancies', 'solid tumors', 'medullary thyroid cancer', 'advanced cancer', 'cancer', 'gastric cancer, renal cell carcinoma, squamous cell cancer of the head and neck', 'avastin-nave recurrent glioblastoma', 'solid tumors, pancreatic cancer', 'metastatic colorectal cancer', 'metastatic castration-resistant prostate canc…	DISEASE: Note=Activation of MET after rearrangement with the TPR gene produces an oncogenic protein.; DISEASE: Note=Defects in MET may be associated with gastric cancer.; DISEASE: Hepatocellular carcinoma (HCC) [MIM:114550]: A primary malignant neoplasm of epithelial liver cells. The major risk factors for HCC are chronic hepatitis B virus (HBV) infection, chronic hepatitis C virus (HCV) infectio…
Nandrolone phenpropionate	DNAP001665	2q2y-MKR	0.97	0.86	0.92	0.25	-9	-10.1	2	P52732	KIF11_HUMAN	Kinesin-like protein KIF11 (Kinesin-like protein 1) (Kinesin-like spindle protein HKSP) (Kinesin-related motor protein Eg5) (Thyroid receptor-interacting protein 5) (TR-interacting protein 5) (TRIP-5)	KIF11 EG5 KNSL1 TRIP5	Homo sapiens (Human)		['solid tumors', 'pediatric', 'liver cancers', 'late-stage solid tumors (see also other)', 'a variety of cancers', "non-hodgkin's lymphoma, cancer/tumors", 'head and neck cancer, renal cell carcinoma, ovarian cancer, solid tumors', 'solid tumour and malignant lymphoma', 'cancer/tumors', 'lung cancer', 'hematological malignancies (see also solid tumors)']	DISEASE: Microcephaly with or without chorioretinopathy, lymphedema, or mental retardation (MCLMR) [MIM:152950]: An autosomal dominant disorder that involves an overlapping but variable spectrum of central nervous system and ocular developmental anomalies. Microcephaly ranges from mild to severe and is often associated with mild to moderate developmental delay and a characteristic facial phenotyp…
Nandrolone phenpropionate	DNAP001665	2vev-IZ2	0.85	0.96	0.91	0.16	-8	-10.1	4.4	P18031	PTN1_HUMAN	Tyrosine-protein phosphatase non-receptor type 1 (EC 3.1.3.48) (Protein-tyrosine phosphatase 1B) (PTP-1B)	PTPN1 PTP1B	Homo sapiens (Human)	3.1.3.48	['obesity', 'type 2 diabetes', 'diabetes']
Nandrolone phenpropionate	DNAP001665	2ijm-ATP	0.98	0.8	0.89	0.06	-8.6	-7.6	1.9	Q05397	FAK1_HUMAN	Focal adhesion kinase 1 (FADK 1) (EC 2.7.10.2) (Focal adhesion kinase-related nonkinase) (FRNK) (Protein phosphatase 1 regulatory subunit 71) (PPP1R71) (Protein-tyrosine kinase 2) (p125FAK) (pp125FAK)	PTK2 FAK FAK1	Homo sapiens (Human)	2.7.10.2	[]	DISEASE: Note=Aberrant PTK2/FAK1 expression may play a role in cancer cell proliferation, migration and invasion, in tumor formation and metastasis. PTK2/FAK1 overexpression is seen in many types of cancer.
Nandrolone phenpropionate	DNAP001665	3ox3-4X4	0.8	0.97	0.89	0.09	-11.4	-10.2	1.8	P16083	NQO2_HUMAN	Ribosyldihydronicotinamide dehydrogenase [quinone] (EC 1.10.99.2) (NRH dehydrogenase [quinone] 2) (NRH:quinone oxidoreductase 2) (Quinone reductase 2) (QR2)	NQO2 NMOR2	Homo sapiens (Human)	1.10.99.2	['cancer/tumors']
Nandrolone phenpropionate	DNAP001665	3gvu-STI	0.97	0.76	0.87	0.13	-10.9	-13.5	0.4	P42684	ABL2_HUMAN	Abelson tyrosine-protein kinase 2 (EC 2.7.10.2) (Abelson murine leukemia viral oncogene homolog 2) (Abelson-related gene protein) (Tyrosine-protein kinase ARG)	ABL2 ABLL ARG	Homo sapiens (Human)	2.7.10.2	['advanced breast cancer', 'intestinal cancer & myeloid leukemia', 'dietary shortage', 'chronic myelogenous leukemia', 'leukemia', 'osteosarcoma; hematological malignancies, solid tumours', 'all, cml, gist', 'solid tumours, multiple myeloma', 'glioma, lung, prostate, solid tumours']
Nelarabine	DAP000985	1rfg-GMP	0.99	0.96	0.98	0.75	-7.1	-8.1	1.2	P00491	PNPH_HUMAN	Purine nucleoside phosphorylase (PNP) (EC 2.4.2.1) (Inosine phosphorylase) (Inosine-guanosine phosphorylase)	PNP NP	Homo sapiens (Human)	2.4.2.1	['moderate to severe plaque psoriasis', 'psoriasis, cutaneous t-cell lymphoma', 'refractory cutaneous t-cell lymphoma, b cell acute lymphoblastic leukemia']	DISEASE: Purine nucleoside phosphorylase deficiency (PNPD) [MIM:613179]: A disorder that interrupts both the catabolism of inosine into hypoxanthine and guanosine into guanine, and leads to the accumulation of guanosine, inosine, and their deoxified by-products. The main clinical presentation is recurrent infections due to severe T-cell immunodeficiency. Some patients also have neurologic impairm…
Nelarabine	DAP000985	2ye8-2D3	0.9	0.98	0.94	0.14	-5.8	-5.9	1.5	P07900	HS90A_HUMAN	Heat shock protein HSP 90-alpha (Heat shock 86 kDa) (HSP 86) (HSP86) (Lipopolysaccharide-associated protein 2) (LAP-2) (LPS-associated protein 2) (Renal carcinoma antigen NY-REN-38)	HSP90AA1 HSP90A HSPC1 HSPCA	Homo sapiens (Human)		['breast cancer, melanoma', 'solid tumors', 'ovarian cancer, refractory hematological malignancies', 'solid tumors, chronic myelogenous leukemia', 'refractory acute myelogenous leukemia; her2-positive metastatic breast cancer and leukaemia', 'gastrointestinal stromal tumors', 'multiple myeloma', 'non-small cell lung cancer', 'hematological malignancies', 'cancer/tumors', 'prostate cancer']
Nelarabine	DAP000985	3rps-4B0	0.86	0.98	0.92	0.11	-6.6	-6.7	1.1	P68400	CSK21_HUMAN	Casein kinase II subunit alpha (CK II alpha) (EC 2.7.11.1)	CSNK2A1 CK2A1	Homo sapiens (Human)	2.7.11.1	['solid tumors', 'multiple myeloma']
Nelarabine	DAP000985	3msl-EV5	0.83	0.98	0.91	0.1	-6	-6.7	2.7	P56817	BACE1_HUMAN	Beta-secretase 1 (EC 3.4.23.46) (Aspartyl protease 2) (ASP2) (Asp 2) (Beta-site amyloid precursor protein cleaving enzyme 1) (Beta-site APP cleaving enzyme 1) (Memapsin-2) (Membrane-associated aspartic protease 2)	BACE1 BACE KIAA1149	Homo sapiens (Human)	3.4.23.46	["alzheimer's disease"]
Neocarzinostatin	DNAP001640	3kku-B95	0.82	0.85	0.84	0.06	-5.8	-5	2.5	P25779	CYSP_TRYCR	Cruzipain (EC 3.4.22.51) (Cruzaine) (Major cysteine proteinase)		Trypanosoma cruzi	3.4.22.51	['p. falciparum']
Neocarzinostatin	DNAP001640	3ox3-4X4	0.8	0.86	0.83	0.09	-11.2	-10.2	1.8	P16083	NQO2_HUMAN	Ribosyldihydronicotinamide dehydrogenase [quinone] (EC 1.10.99.2) (NRH dehydrogenase [quinone] 2) (NRH:quinone oxidoreductase 2) (Quinone reductase 2) (QR2)	NQO2 NMOR2	Homo sapiens (Human)	1.10.99.2	['cancer/tumors']
Neocarzinostatin	DNAP001640	3pls-ANP	0.89	0.75	0.82	0.1	-10.1	-8.2	2.8	Q04912	RON_HUMAN	Macrophage-stimulating protein receptor (MSP receptor) (EC 2.7.10.1) (CDw136) (Protein-tyrosine kinase 8) (p185-Ron) (CD antigen CD136) [Cleaved into: Macrophage-stimulating protein receptor alpha chain; Macrophage-stimulating protein receptor beta chain]	MST1R PTK8 RON	Homo sapiens (Human)	2.7.10.1	['cancer']
Neocarzinostatin	DNAP001640	2i78-KIQ	0.79	0.85	0.82	0.07	-8.2	-9.8	0.7	P27487	DPP4_HUMAN	Dipeptidyl peptidase 4 (EC 3.4.14.5) (ADABP) (Adenosine deaminase complexing protein 2) (ADCP-2) (Dipeptidyl peptidase IV) (DPP IV) (T-cell activation antigen CD26) (TP103) (CD antigen CD26) [Cleaved into: Dipeptidyl peptidase 4 membrane form (Dipeptidyl peptidase IV membrane form); Dipeptidyl peptidase 4 soluble form (Dipeptidyl peptidase IV soluble form)]	DPP4 ADCP2 CD26	Homo sapiens (Human)	3.4.14.5	['diabetes mellitus', 'type 2 diabetes', 'diabetes mellitus type ii', 'diabetes', 'hyperglycaemia in type 2 diabetes mellitus']
Neocarzinostatin	DNAP001640	2w1f-L0F	0.73	0.87	0.8	0.06	-8.9	-8.1	2	O14965	AURKA_HUMAN	Aurora kinase A (EC 2.7.11.1) (Aurora 2) (Aurora/IPL1-related kinase 1) (ARK-1) (Aurora-related kinase 1) (hARK1) (Breast tumor-amplified kinase) (Serine/threonine-protein kinase 15) (Serine/threonine-protein kinase 6) (Serine/threonine-protein kinase aurora-A)	AURKA AIK AIRK1 ARK1 AURA AYK1 BTAK IAK1 STK15 STK6	Homo sapiens (Human)	2.7.11.1	['chronic myelogenous leukemia; leukemia; lymphoblastic, acute, philadelphia-positive', 'paediatric solid tumours or all', 'advanced malignancies', 'solid tumors', 'cml that relapsed after imatinib or bcr\xe2\x80\x93abl-targeted therapy; metastatic hormone refractory prostate cancer (mhrpc)', 'leukemia, myeloid', 'ovarian cancer, fallopian cancer, peritoneal cancer', 'leukemia', 'haematological m…
Neocarzinostatin	DNAP001640	3lct-ADP	0.89	0.67	0.78	0.09	-9.1	-6.4	2.4	Q9UM73	ALK_HUMAN	ALK tyrosine kinase receptor (EC 2.7.10.1) (Anaplastic lymphoma kinase) (CD antigen CD246)	ALK	Homo sapiens (Human)	2.7.10.1	[]	DISEASE: Note=A chromosomal aberration involving ALK is found in a form of non-Hodgkin lymphoma. Translocation t(2;5)(p23;q35) with NPM1. The resulting chimeric NPM1-ALK protein homodimerize and the kinase becomes constitutively activated. The constitutively active fusion proteins are responsible for 5-10% of non-Hodgkin lymphomas.; DISEASE: Note=A chromosomal aberration involving ALK is associat…
Nilotinib; AMN-107	DCL000360	1j1c-ADP	0.93	0.97	0.95	0.03	-9.3	-7.8	1.7	P49841	GSK3B_HUMAN	Glycogen synthase kinase-3 beta (GSK-3 beta) (EC 2.7.11.26) (Serine/threonine-protein kinase GSK3B) (EC 2.7.11.1)	GSK3B	Homo sapiens (Human)	2.7.11.26; 2.7.11.1	['aml, acute promyelocytic leukemia (apl)', 'non hodgkin lymphoma', 'glioblastoma multiforme', 'brain and central nervous system tumors']
Nilotinib; AMN-107	DCL000360	2brm-DFZ	0.93	0.94	0.94	0.19	-9.4	-8.3	0.7	O14757	CHK1_HUMAN	Serine/threonine-protein kinase Chk1 (EC 2.7.11.1) (CHK1 checkpoint homolog) (Cell cycle checkpoint kinase) (Checkpoint kinase-1)	CHEK1 CHK1	Homo sapiens (Human)	2.7.11.1	['lymphoma', 'leukaemia and mds; solid tumours; lymphoma and solid tumours', 'cancer', 'rcc, melanoma and lymphoma; sclc', 'ancreatic cancer and non-small cell lung cancer', 'advanced solid tumours or lymphoma', 'solid tumors', 'solid tumors or lymphoma', 'solid tumours; advanced solid malignancies', 'pancreatic cancer', 'non-small cell lung carcinoma', 'advanced solid tumours in combination with…
Nilotinib; AMN-107	DCL000360	1xbb-STI	0.91	0.96	0.94	0.35	-9.3	-7.6	1.4	P43405	KSYK_HUMAN	Tyrosine-protein kinase SYK (EC 2.7.10.2) (Spleen tyrosine kinase) (p72-Syk)	SYK	Homo sapiens (Human)	2.7.10.2	["rheumatoid arthritis, thrombocytopenia, non-hodgkin's lymphoma", 'hematological malignancies', 'cancer', 'rheumatoid arthritis', 'allergic reaction, asthma', 'haematological malignancies', 'b-cell hematological malignancies', 'b-cell malignancies']
Nilotinib; AMN-107	DCL000360	2ok1-33A	0.93	0.93	0.93	0.32	-8.6	-9	0.7	P53779	MK10_HUMAN	Mitogen-activated protein kinase 10 (MAP kinase 10) (MAPK 10) (EC 2.7.11.24) (MAP kinase p49 3F12) (Stress-activated protein kinase 1b) (SAPK1b) (Stress-activated protein kinase JNK3) (c-Jun N-terminal kinase 3)	MAPK10 JNK3 JNK3A PRKM10 SAPK1B	Homo sapiens (Human)	2.7.11.24	[]	DISEASE: Note=A chromosomal aberration involving MAPK10 has been found in a single patient with pharmacoresistant epileptic encephalopathy. Translocation t(Y;4)(q11.2;q21) which causes MAPK10 truncation. {ECO:0000269|PubMed:16249883}.
Nilotinib; AMN-107	DCL000360	3lau-OFI	0.91	0.95	0.93	0.18	-9.6	-8.6	1.3	O14965	AURKA_HUMAN	Aurora kinase A (EC 2.7.11.1) (Aurora 2) (Aurora/IPL1-related kinase 1) (ARK-1) (Aurora-related kinase 1) (hARK1) (Breast tumor-amplified kinase) (Serine/threonine-protein kinase 15) (Serine/threonine-protein kinase 6) (Serine/threonine-protein kinase aurora-A)	AURKA AIK AIRK1 ARK1 AURA AYK1 BTAK IAK1 STK15 STK6	Homo sapiens (Human)	2.7.11.1	['chronic myelogenous leukemia; leukemia; lymphoblastic, acute, philadelphia-positive', 'paediatric solid tumours or all', 'advanced malignancies', 'solid tumors', 'cml that relapsed after imatinib or bcr\xe2\x80\x93abl-targeted therapy; metastatic hormone refractory prostate cancer (mhrpc)', 'leukemia, myeloid', 'ovarian cancer, fallopian cancer, peritoneal cancer', 'leukemia', 'haematological m…
Nilotinib; AMN-107	DCL000360	2oh4-GIG	0.96	0.87	0.92	0.38	-12	-12	0.7	P35968	VGFR2_HUMAN	Vascular endothelial growth factor receptor 2 (VEGFR-2) (EC 2.7.10.1) (Fetal liver kinase 1) (FLK-1) (Kinase insert domain receptor) (KDR) (Protein-tyrosine kinase receptor flk-1) (CD antigen CD309)	KDR FLK1 VEGFR2	Homo sapiens (Human)	2.7.10.1	['metastatic breast cancer', 'a variety of cancers, such as metastatic breast, colorectal and gastric cancers', 'advanced breast cancer', 'cancer', 'ovarian cancer', 'renal cell carcinoma', 'various cancers', 'non-small cell lung cancer', 'carcinoma, non-small-cell lung', 'metastatic castration-resistant prostate cancer, ovarian cancer', 'solid tumors', 'medullary thyroid cancer', 'advanced renal…	DISEASE: Hemangioma, capillary infantile (HCI) [MIM:602089]: A condition characterized by dull red, firm, dome-shaped hemangiomas, sharply demarcated from surrounding skin, usually presenting at birth or occurring within the first two or three months of life. They result from highly proliferative, localized growth of capillary endothelium and generally undergo regression and involution without sc…
Nilotinib; AMN-107	DCL000360	1r0p-KSA	0.97	0.83	0.9	0.19	-10.1	-6.3	1.9	P08581	MET_HUMAN	Hepatocyte growth factor receptor (HGF receptor) (EC 2.7.10.1) (HGF/SF receptor) (Proto-oncogene c-Met) (Scatter factor receptor) (SF receptor) (Tyrosine-protein kinase Met)	MET	Homo sapiens (Human)	2.7.10.1	['solid tumours', '1st line squamous non-small cell lung cancer', 'advanced malignancies', 'solid tumors', 'medullary thyroid cancer', 'advanced cancer', 'cancer', 'gastric cancer, renal cell carcinoma, squamous cell cancer of the head and neck', 'avastin-nave recurrent glioblastoma', 'solid tumors, pancreatic cancer', 'metastatic colorectal cancer', 'metastatic castration-resistant prostate canc…	DISEASE: Note=Activation of MET after rearrangement with the TPR gene produces an oncogenic protein.; DISEASE: Note=Defects in MET may be associated with gastric cancer.; DISEASE: Hepatocellular carcinoma (HCC) [MIM:114550]: A primary malignant neoplasm of epithelial liver cells. The major risk factors for HCC are chronic hepatitis B virus (HBV) infection, chronic hepatitis C virus (HCV) infectio…
Nilotinib; AMN-107	DCL000360	2oj9-BMI	0.96	0.83	0.9	0.36	-9.4	-9.5	0.9	P08069	IGF1R_HUMAN	Insulin-like growth factor 1 receptor (EC 2.7.10.1) (Insulin-like growth factor I receptor) (IGF-I receptor) (CD antigen CD221) [Cleaved into: Insulin-like growth factor 1 receptor alpha chain; Insulin-like growth factor 1 receptor beta chain]	IGF1R	Homo sapiens (Human)	2.7.10.1	['igf-1 deficiency', 'cancer', 'various cancers, multiple myeloma', "nsclc, ewing's sarcoma and metastatic breast cancer", 'multiple myeloma', 'non-small cell lung cancer (biologic)', 'cancers', 'on-small cell lung cancer', "gastrointestinal cancers; genitourinary; ewing's sarcoma; small cell lung cancer; breast cancer (biologic)"]	DISEASE: Insulin-like growth factor 1 resistance (IGF1RES) [MIM:270450]: A disorder characterized by intrauterine growth retardation, poor postnatal growth and increased plasma IGF1 levels. {ECO:0000269|PubMed:14657428, ECO:0000269|PubMed:15928254}. Note=The disease is caused by mutations affecting the gene represented in this entry.
Nilotinib; AMN-107	DCL000360	3gvu-STI	0.96	0.81	0.89	0.35	-13.4	-13.5	0.4	P42684	ABL2_HUMAN	Abelson tyrosine-protein kinase 2 (EC 2.7.10.2) (Abelson murine leukemia viral oncogene homolog 2) (Abelson-related gene protein) (Tyrosine-protein kinase ARG)	ABL2 ABLL ARG	Homo sapiens (Human)	2.7.10.2	['advanced breast cancer', 'intestinal cancer & myeloid leukemia', 'dietary shortage', 'chronic myelogenous leukemia', 'leukemia', 'osteosarcoma; hematological malignancies, solid tumours', 'all, cml, gist', 'solid tumours, multiple myeloma', 'glioma, lung, prostate, solid tumours']
Pazopanib; GW-786034	DCL000351	3nzs-NZS	0.93	0.87	0.9	0.23	-8.6	-8	0.8	P48736	PK3CG_HUMAN	Phosphatidylinositol 4,5-bisphosphate 3-kinase catalytic subunit gamma isoform (PI3-kinase subunit gamma) (PI3K-gamma) (PI3Kgamma) (PtdIns-3-kinase subunit gamma) (EC 2.7.1.153) (Phosphatidylinositol 4,5-bisphosphate 3-kinase 110 kDa catalytic subunit gamma) (PtdIns-3-kinase subunit p110-gamma) (p110gamma) (Phosphoinositide-3-kinase catalytic gamma polypeptide) (Serine/threonine protein kinase PI…	PIK3CG	Homo sapiens (Human)	2.7.1.153; 2.7.11.1	['metastatic breast cancer', 'lymphoma', 'solid tumors', "advanced solid tumours; non-hodgkin's lymphoma", 'cancer', 'advanced solid tumours; advanced breast cancer', 'myeloma (see also lymphoma)', 'metastatic solid tumors', 'thrombosis', 'advanced solid tumours; metastatic breast cancer; endometrial cancer; lymphoma', 'angioedema, myocardial infarction', 'advanced solid tumours', "advanced solid…
Pazopanib; GW-786034	DCL000351	1u71-MXA	0.89	0.85	0.87	0.24	-9.8	-8.6	0.4	P00374	DYR_HUMAN	Dihydrofolate reductase (EC 1.5.1.3)	DHFR	Homo sapiens (Human)	1.5.1.3	['gram-positive and -negative bacterial infections', 'malaria and bacterial infections', 'malaria', 'leukemia', 'plasmodium falciparum', 'peripheral t cell lymphoma', 'bacterial infections', 'urinary tract infections', 'acute malaria', 'pneumocystis pneumonia (pcp)', 'advanced cancer']	DISEASE: Megaloblastic anemia due to dihydrofolate reductase deficiency (DHFRD) [MIM:613839]: An inborn error of metabolism, characterized by megaloblastic anemia and/or pancytopenia, severe cerebral folate deficiency, and cerebral tetrahydrobiopterin deficiency. Clinical features include variable neurologic symptoms, ranging from severe developmental delay and generalized seizures in infancy, to…
Pazopanib; GW-786034	DCL000351	2wi4-ZZ4	0.89	0.84	0.87	0.25	-8.8	-7.5	1.2	P07900	HS90A_HUMAN	Heat shock protein HSP 90-alpha (Heat shock 86 kDa) (HSP 86) (HSP86) (Lipopolysaccharide-associated protein 2) (LAP-2) (LPS-associated protein 2) (Renal carcinoma antigen NY-REN-38)	HSP90AA1 HSP90A HSPC1 HSPCA	Homo sapiens (Human)		['breast cancer, melanoma', 'solid tumors', 'ovarian cancer, refractory hematological malignancies', 'solid tumors, chronic myelogenous leukemia', 'refractory acute myelogenous leukemia; her2-positive metastatic breast cancer and leukaemia', 'gastrointestinal stromal tumors', 'multiple myeloma', 'non-small cell lung cancer', 'hematological malignancies', 'cancer/tumors', 'prostate cancer']
Pazopanib; GW-786034	DCL000351	3fqe-P5C	0.85	0.87	0.86	0.18	-9	-9.6	0.5	P43405	KSYK_HUMAN	Tyrosine-protein kinase SYK (EC 2.7.10.2) (Spleen tyrosine kinase) (p72-Syk)	SYK	Homo sapiens (Human)	2.7.10.2	["rheumatoid arthritis, thrombocytopenia, non-hodgkin's lymphoma", 'hematological malignancies', 'cancer', 'rheumatoid arthritis', 'allergic reaction, asthma', 'haematological malignancies', 'b-cell hematological malignancies', 'b-cell malignancies']
Pazopanib; GW-786034	DCL000351	3l8p-0CE	0.84	0.87	0.86	0.18	-10.1	-13.3	0.6	Q02763	TIE2_HUMAN	Angiopoietin-1 receptor (EC 2.7.10.1) (Endothelial tyrosine kinase) (Tunica interna endothelial cell kinase) (Tyrosine kinase with Ig and EGF homology domains-2) (Tyrosine-protein kinase receptor TEK) (Tyrosine-protein kinase receptor TIE-2) (hTIE2) (p140 TEK) (CD antigen CD202b)	TEK TIE2 VMCM VMCM1	Homo sapiens (Human)	2.7.10.1	['pancreastic cancer, prostate cancer & solid tumours', 'solid tumors', 'diabetic macular edema', 'myelodysplastic syndromes']	DISEASE: Dominantly inherited venous malformations (VMCM) [MIM:600195]: An error of vascular morphogenesis characterized by dilated, serpiginous channels. {ECO:0000269|PubMed:10369874, ECO:0000269|PubMed:19888299, ECO:0000269|PubMed:8980225}. Note=The disease is caused by mutations affecting the gene represented in this entry.; DISEASE: Note=May play a role in a range of diseases with a vascular …
Pazopanib; GW-786034	DCL000351	2x9f-X9F	0.98	0.72	0.85	0.45	-8.6	-9.4	0.9	P54760	EPHB4_HUMAN	Ephrin type-B receptor 4 (EC 2.7.10.1) (Hepatoma transmembrane kinase) (Tyrosine-protein kinase TYRO11)	EPHB4 HTK MYK1 TYRO11	Homo sapiens (Human)	2.7.10.1	['carcinoma, non-small-cell lung', 'cancer']
Pazopanib; GW-786034	DCL000351	2oj9-BMI	0.94	0.76	0.85	0.3	-8.5	-9.5	0.9	P08069	IGF1R_HUMAN	Insulin-like growth factor 1 receptor (EC 2.7.10.1) (Insulin-like growth factor I receptor) (IGF-I receptor) (CD antigen CD221) [Cleaved into: Insulin-like growth factor 1 receptor alpha chain; Insulin-like growth factor 1 receptor beta chain]	IGF1R	Homo sapiens (Human)	2.7.10.1	['igf-1 deficiency', 'cancer', 'various cancers, multiple myeloma', "nsclc, ewing's sarcoma and metastatic breast cancer", 'multiple myeloma', 'non-small cell lung cancer (biologic)', 'cancers', 'on-small cell lung cancer', "gastrointestinal cancers; genitourinary; ewing's sarcoma; small cell lung cancer; breast cancer (biologic)"]	DISEASE: Insulin-like growth factor 1 resistance (IGF1RES) [MIM:270450]: A disorder characterized by intrauterine growth retardation, poor postnatal growth and increased plasma IGF1 levels. {ECO:0000269|PubMed:14657428, ECO:0000269|PubMed:15928254}. Note=The disease is caused by mutations affecting the gene represented in this entry.
Pazopanib; GW-786034	DCL000351	3fsf-FSS	0.86	0.84	0.85	0.25	-8	-7.1	1.6	Q16539	MK14_HUMAN	Mitogen-activated protein kinase 14 (MAP kinase 14) (MAPK 14) (EC 2.7.11.24) (Cytokine suppressive anti-inflammatory drug-binding protein) (CSAID-binding protein) (CSBP) (MAP kinase MXI2) (MAX-interacting protein 2) (Mitogen-activated protein kinase p38 alpha) (MAP kinase p38 alpha) (Stress-activated protein kinase 2a) (SAPK2a)	MAPK14 CSBP CSBP1 CSBP2 CSPB1 MXI2 SAPK2A	Homo sapiens (Human)	2.7.11.24	['cardiovascular disease, copd and depression', 'pain', 'copd', 'acute lung injury & acute respiratory distress syndrome']
Pazopanib; GW-786034	DCL000351	3dtc-VIN	0.8	0.84	0.82	0.21	-9.8	-12.1	0.7	P80192	M3K9_HUMAN	Mitogen-activated protein kinase kinase kinase 9 (EC 2.7.11.25) (Mixed lineage kinase 1)	MAP3K9 MLK1 PRKE1	Homo sapiens (Human)	2.7.11.25	[]	DISEASE: Note=May play a role in esophageal cancer susceptibility and/or development.
Pazopanib; GW-786034	DCL000351	2w1f-L0F	0.78	0.84	0.81	0.26	-8.9	-8.1	2	O14965	AURKA_HUMAN	Aurora kinase A (EC 2.7.11.1) (Aurora 2) (Aurora/IPL1-related kinase 1) (ARK-1) (Aurora-related kinase 1) (hARK1) (Breast tumor-amplified kinase) (Serine/threonine-protein kinase 15) (Serine/threonine-protein kinase 6) (Serine/threonine-protein kinase aurora-A)	AURKA AIK AIRK1 ARK1 AURA AYK1 BTAK IAK1 STK15 STK6	Homo sapiens (Human)	2.7.11.1	['chronic myelogenous leukemia; leukemia; lymphoblastic, acute, philadelphia-positive', 'paediatric solid tumours or all', 'advanced malignancies', 'solid tumors', 'cml that relapsed after imatinib or bcr\xe2\x80\x93abl-targeted therapy; metastatic hormone refractory prostate cancer (mhrpc)', 'leukemia, myeloid', 'ovarian cancer, fallopian cancer, peritoneal cancer', 'leukemia', 'haematological m…
Pazopanib; GW-786034	DCL000351	2uzb-C75	0.74	0.85	0.79	0.23	-9.2	-8.2	2.1	P24941	CDK2_HUMAN	Cyclin-dependent kinase 2 (EC 2.7.11.22) (Cell division protein kinase 2) (p33 protein kinase)	CDK2 CDKN2	Homo sapiens (Human)	2.7.11.22	['advanced solid tumors', 'solid tumors', 'advanced breast cancer, nsclc, acute leukaemia and lymphoma', 'breast, nsclc, lymphoid leukemia, glomerulonephritis & multiple myeloma', 'advanced solid tumours', 'b-lymphoid malignancies and advanced solid tumours', 'chronic lymphocytic leukemia', 'neoplasms, advanced solid tumours', 'hepatocellular carcinoma', 'advanced solid tumours, nhl, multiple mye…
Pemetrexed	DAP000049	3k8q-22A	0.94	0.86	0.9	0.15	-7.5	-6.4	1	P00491	PNPH_HUMAN	Purine nucleoside phosphorylase (PNP) (EC 2.4.2.1) (Inosine phosphorylase) (Inosine-guanosine phosphorylase)	PNP NP	Homo sapiens (Human)	2.4.2.1	['moderate to severe plaque psoriasis', 'psoriasis, cutaneous t-cell lymphoma', 'refractory cutaneous t-cell lymphoma, b cell acute lymphoblastic leukemia']	DISEASE: Purine nucleoside phosphorylase deficiency (PNPD) [MIM:613179]: A disorder that interrupts both the catabolism of inosine into hypoxanthine and guanosine into guanine, and leads to the accumulation of guanosine, inosine, and their deoxified by-products. The main clinical presentation is recurrent infections due to severe T-cell immunodeficiency. Some patients also have neurologic impairm…
Pemetrexed	DAP000049	3byz-H11	0.84	0.86	0.85	0.08	-8.1	-8.4	1.1	P28845	DHI1_HUMAN	Corticosteroid 11-beta-dehydrogenase isozyme 1 (EC 1.1.1.146) (11-beta-hydroxysteroid dehydrogenase 1) (11-DH) (11-beta-HSD1)	HSD11B1 HSD11 HSD11L	Homo sapiens (Human)	1.1.1.146	['type 2 diabetes', 'diabetes mellitus type 1', 'diabetes mellitus type 2', 'diabetes, obesity', 'hypercholesterolemia', 'diabetes mellitus type 2/obesity']	DISEASE: Cortisone reductase deficiency (CRD) [MIM:604931]: In CRD, activation of cortisone to cortisol does not occur, resulting in adrenocorticotropin-mediated androgen excess and a phenotype resembling polycystic ovary syndrome (PCOS). Note=The disease is caused by mutations affecting the gene represented in this entry.
Pemetrexed	DAP000049	2y0j-AXC	0.85	0.83	0.84	0.18	-8	-8.1	1.1	Q9Y233	PDE10_HUMAN	cAMP and cAMP-inhibited cGMP 3',5'-cyclic phosphodiesterase 10A (EC 3.1.4.17) (EC 3.1.4.35)	PDE10A	Homo sapiens (Human)	3.1.4.17; 3.1.4.35	['schizoaffective disorder, schizophrenia', 'schizophrenia']
Pemetrexed	DAP000049	3lau-OFI	0.88	0.76	0.82	0.25	-8.2	-8.6	1.3	O14965	AURKA_HUMAN	Aurora kinase A (EC 2.7.11.1) (Aurora 2) (Aurora/IPL1-related kinase 1) (ARK-1) (Aurora-related kinase 1) (hARK1) (Breast tumor-amplified kinase) (Serine/threonine-protein kinase 15) (Serine/threonine-protein kinase 6) (Serine/threonine-protein kinase aurora-A)	AURKA AIK AIRK1 ARK1 AURA AYK1 BTAK IAK1 STK15 STK6	Homo sapiens (Human)	2.7.11.1	['chronic myelogenous leukemia; leukemia; lymphoblastic, acute, philadelphia-positive', 'paediatric solid tumours or all', 'advanced malignancies', 'solid tumors', 'cml that relapsed after imatinib or bcr\xe2\x80\x93abl-targeted therapy; metastatic hormone refractory prostate cancer (mhrpc)', 'leukemia, myeloid', 'ovarian cancer, fallopian cancer, peritoneal cancer', 'leukemia', 'haematological m…
Pemetrexed	DAP000049	2ye8-2D3	0.8	0.84	0.82	0.08	-7	-5.9	1.5	P07900	HS90A_HUMAN	Heat shock protein HSP 90-alpha (Heat shock 86 kDa) (HSP 86) (HSP86) (Lipopolysaccharide-associated protein 2) (LAP-2) (LPS-associated protein 2) (Renal carcinoma antigen NY-REN-38)	HSP90AA1 HSP90A HSPC1 HSPCA	Homo sapiens (Human)		['breast cancer, melanoma', 'solid tumors', 'ovarian cancer, refractory hematological malignancies', 'solid tumors, chronic myelogenous leukemia', 'refractory acute myelogenous leukemia; her2-positive metastatic breast cancer and leukaemia', 'gastrointestinal stromal tumors', 'multiple myeloma', 'non-small cell lung cancer', 'hematological malignancies', 'cancer/tumors', 'prostate cancer']
Pemetrexed	DAP000049	2rcw-AAI	0.73	0.84	0.78	0.17	-8.3	-8.7	1.6	P09874	PARP1_HUMAN	Poly [ADP-ribose] polymerase 1 (PARP-1) (EC 2.4.2.30) (ADP-ribosyltransferase diphtheria toxin-like 1) (ARTD1) (NAD(+) ADP-ribosyltransferase 1) (ADPRT 1) (Poly[ADP-ribose] synthase 1)	PARP1 ADPRT PPOL	Homo sapiens (Human)	2.4.2.30	['brain cancer', 'cancer; solid tumors', 'solid tumors', 'hematological malignancies', 'melanoma', 'cancer', 'malignant melanoma', 'triple negative breast cancer', 'nsclc (combination therapy) (see also lymphoma)', 'neoplasm metastasis; solid tumors', 'inflammatory skin conditions', 'stroke', 'gastric cancer; breast cancer; ovarian cancer', 'brain ischaemia', 'breast/ovarian cancer', 'myocardial …
Pemetrexed	DAP000049	3ccz-5HI	0.88	0.68	0.78	0.25	-8.1	-8.4	1.4	P04035	HMDH_HUMAN	3-hydroxy-3-methylglutaryl-coenzyme A reductase (HMG-CoA reductase) (EC 1.1.1.34)	HMGCR	Homo sapiens (Human)	1.1.1.34	['hyperlipidaemia and mixed dyslipidaemia', 'hypercholesterolemia', 'atherosclerosis', 'multiple myeloma', 'hyperlipidemia', 'dyslipidaemia', 'hepatitis b', 'elevated crp', 'antihyperlipidaemic', 'myocardial infarction, cerebrovascular ischaemia']
Pentostatin; deoxycoformycin	DAP000566	1rct-NOS	0.84	0.71	0.77	0.45	-7.1	-7.1	2.6	P00491	PNPH_HUMAN	Purine nucleoside phosphorylase (PNP) (EC 2.4.2.1) (Inosine phosphorylase) (Inosine-guanosine phosphorylase)	PNP NP	Homo sapiens (Human)	2.4.2.1	['moderate to severe plaque psoriasis', 'psoriasis, cutaneous t-cell lymphoma', 'refractory cutaneous t-cell lymphoma, b cell acute lymphoblastic leukemia']	DISEASE: Purine nucleoside phosphorylase deficiency (PNPD) [MIM:613179]: A disorder that interrupts both the catabolism of inosine into hypoxanthine and guanosine into guanine, and leads to the accumulation of guanosine, inosine, and their deoxified by-products. The main clinical presentation is recurrent infections due to severe T-cell immunodeficiency. Some patients also have neurologic impairm…
Pirarubicin	DNAP001485	2ogz-U1N	0.88	0.82	0.85	0.08	-6.6	-8.3	1.7	P27487	DPP4_HUMAN	Dipeptidyl peptidase 4 (EC 3.4.14.5) (ADABP) (Adenosine deaminase complexing protein 2) (ADCP-2) (Dipeptidyl peptidase IV) (DPP IV) (T-cell activation antigen CD26) (TP103) (CD antigen CD26) [Cleaved into: Dipeptidyl peptidase 4 membrane form (Dipeptidyl peptidase IV membrane form); Dipeptidyl peptidase 4 soluble form (Dipeptidyl peptidase IV soluble form)]	DPP4 ADCP2 CD26	Homo sapiens (Human)	3.4.14.5	['diabetes mellitus', 'type 2 diabetes', 'diabetes mellitus type ii', 'diabetes', 'hyperglycaemia in type 2 diabetes mellitus']
Pirarubicin	DNAP001485	2bel-CBO	0.93	0.75	0.84	0.22	-9.4	-12.5	1.3	P28845	DHI1_HUMAN	Corticosteroid 11-beta-dehydrogenase isozyme 1 (EC 1.1.1.146) (11-beta-hydroxysteroid dehydrogenase 1) (11-DH) (11-beta-HSD1)	HSD11B1 HSD11 HSD11L	Homo sapiens (Human)	1.1.1.146	['type 2 diabetes', 'diabetes mellitus type 1', 'diabetes mellitus type 2', 'diabetes, obesity', 'hypercholesterolemia', 'diabetes mellitus type 2/obesity']	DISEASE: Cortisone reductase deficiency (CRD) [MIM:604931]: In CRD, activation of cortisone to cortisol does not occur, resulting in adrenocorticotropin-mediated androgen excess and a phenotype resembling polycystic ovary syndrome (PCOS). Note=The disease is caused by mutations affecting the gene represented in this entry.
Pirarubicin	DNAP001485	1kvl-THN	0.83	0.85	0.84	0.1	-6.4	-6.8	1.2	P00811	AMPC_ECOLI	Beta-lactamase (EC 3.5.2.6) (Cephalosporinase)	ampC ampA b4150 JW4111	Escherichia coli (strain K12)	3.5.2.6	['mrsa', 'gram-positive and -negative bacterial infections', 'bacterial infections', 'serious infections', 'infection']
Pirarubicin	DNAP001485	3pls-ANP	0.92	0.71	0.82	0.09	-8.6	-8.2	2.8	Q04912	RON_HUMAN	Macrophage-stimulating protein receptor (MSP receptor) (EC 2.7.10.1) (CDw136) (Protein-tyrosine kinase 8) (p185-Ron) (CD antigen CD136) [Cleaved into: Macrophage-stimulating protein receptor alpha chain; Macrophage-stimulating protein receptor beta chain]	MST1R PTK8 RON	Homo sapiens (Human)	2.7.10.1	['cancer']
Pirarubicin	DNAP001485	3l3m-A92	0.91	0.71	0.81	0.12	-8.1	-10.2	1.1	P09874	PARP1_HUMAN	Poly [ADP-ribose] polymerase 1 (PARP-1) (EC 2.4.2.30) (ADP-ribosyltransferase diphtheria toxin-like 1) (ARTD1) (NAD(+) ADP-ribosyltransferase 1) (ADPRT 1) (Poly[ADP-ribose] synthase 1)	PARP1 ADPRT PPOL	Homo sapiens (Human)	2.4.2.30	['brain cancer', 'cancer; solid tumors', 'solid tumors', 'hematological malignancies', 'melanoma', 'cancer', 'malignant melanoma', 'triple negative breast cancer', 'nsclc (combination therapy) (see also lymphoma)', 'neoplasm metastasis; solid tumors', 'inflammatory skin conditions', 'stroke', 'gastric cancer; breast cancer; ovarian cancer', 'brain ischaemia', 'breast/ovarian cancer', 'myocardial …
Pirarubicin	DNAP001485	3ofi-MET_GLN_ILE	0.81	0.81	0.81	0.15	-6.8	-5.3	2.2	P14735	IDE_HUMAN	Insulin-degrading enzyme (EC 3.4.24.56) (Abeta-degrading protease) (Insulin protease) (Insulinase) (Insulysin)	IDE	Homo sapiens (Human)	3.4.24.56	['bacterial infection']
Pralatrexate	DAP001549	3byz-H11	0.74	0.8	0.77	0.06	-7.6	-8.4	1.1	P28845	DHI1_HUMAN	Corticosteroid 11-beta-dehydrogenase isozyme 1 (EC 1.1.1.146) (11-beta-hydroxysteroid dehydrogenase 1) (11-DH) (11-beta-HSD1)	HSD11B1 HSD11 HSD11L	Homo sapiens (Human)	1.1.1.146	['type 2 diabetes', 'diabetes mellitus type 1', 'diabetes mellitus type 2', 'diabetes, obesity', 'hypercholesterolemia', 'diabetes mellitus type 2/obesity']	DISEASE: Cortisone reductase deficiency (CRD) [MIM:604931]: In CRD, activation of cortisone to cortisol does not occur, resulting in adrenocorticotropin-mediated androgen excess and a phenotype resembling polycystic ovary syndrome (PCOS). Note=The disease is caused by mutations affecting the gene represented in this entry.
Pralatrexate	DAP001549	3k8q-22A	0.81	0.72	0.77	0.13	-7.3	-6.4	1	P00491	PNPH_HUMAN	Purine nucleoside phosphorylase (PNP) (EC 2.4.2.1) (Inosine phosphorylase) (Inosine-guanosine phosphorylase)	PNP NP	Homo sapiens (Human)	2.4.2.1	['moderate to severe plaque psoriasis', 'psoriasis, cutaneous t-cell lymphoma', 'refractory cutaneous t-cell lymphoma, b cell acute lymphoblastic leukemia']	DISEASE: Purine nucleoside phosphorylase deficiency (PNPD) [MIM:613179]: A disorder that interrupts both the catabolism of inosine into hypoxanthine and guanosine into guanine, and leads to the accumulation of guanosine, inosine, and their deoxified by-products. The main clinical presentation is recurrent infections due to severe T-cell immunodeficiency. Some patients also have neurologic impairm…
Pralatrexate	DAP001549	2b35-TCL	0.73	0.77	0.75	0.09	-7.5	-5.6	4.7	P0A5Y6	INHA_MYCTU	Enoyl-[acyl-carrier-protein] reductase [NADH] (EC 1.3.1.9) (NADH-dependent enoyl-ACP reductase)	inhA Rv1484 MTCY277.05	Mycobacterium tuberculosis (strain ATCC 25618 / H37Rv)	2.5.1.86; 2.5.1.87	['tuberculosis']
Pralatrexate	DAP001549	2ye8-2D3	0.7	0.76	0.73	0.07	-6.2	-5.9	1.5	P07900	HS90A_HUMAN	Heat shock protein HSP 90-alpha (Heat shock 86 kDa) (HSP 86) (HSP86) (Lipopolysaccharide-associated protein 2) (LAP-2) (LPS-associated protein 2) (Renal carcinoma antigen NY-REN-38)	HSP90AA1 HSP90A HSPC1 HSPCA	Homo sapiens (Human)		['breast cancer, melanoma', 'solid tumors', 'ovarian cancer, refractory hematological malignancies', 'solid tumors, chronic myelogenous leukemia', 'refractory acute myelogenous leukemia; her2-positive metastatic breast cancer and leukaemia', 'gastrointestinal stromal tumors', 'multiple myeloma', 'non-small cell lung cancer', 'hematological malignancies', 'cancer/tumors', 'prostate cancer']
Pralatrexate	DAP001549	1nhw-TCC	0.69	0.76	0.73	0.1	-7.4	-7	1	Q9BH77	Q9BH77_PLAFA	Enoyl-ACP reductase (Enoyl-acyl carrier reductase)	FabI	Plasmodium falciparum		['p. falciparum, trypanosoma', 'bacterial infections']
Raltitrexed	DAP000759	3myg-EML	0.82	0.79	0.8	0.2	-7.7	-7.5	0.6	O14965	AURKA_HUMAN	Aurora kinase A (EC 2.7.11.1) (Aurora 2) (Aurora/IPL1-related kinase 1) (ARK-1) (Aurora-related kinase 1) (hARK1) (Breast tumor-amplified kinase) (Serine/threonine-protein kinase 15) (Serine/threonine-protein kinase 6) (Serine/threonine-protein kinase aurora-A)	AURKA AIK AIRK1 ARK1 AURA AYK1 BTAK IAK1 STK15 STK6	Homo sapiens (Human)	2.7.11.1	['chronic myelogenous leukemia; leukemia; lymphoblastic, acute, philadelphia-positive', 'paediatric solid tumours or all', 'advanced malignancies', 'solid tumors', 'cml that relapsed after imatinib or bcr\xe2\x80\x93abl-targeted therapy; metastatic hormone refractory prostate cancer (mhrpc)', 'leukemia, myeloid', 'ovarian cancer, fallopian cancer, peritoneal cancer', 'leukemia', 'haematological m…
Raltitrexed	DAP000759	2chz-093	0.85	0.71	0.78	0.24	-8.1	-7	0.4	P48736	PK3CG_HUMAN	Phosphatidylinositol 4,5-bisphosphate 3-kinase catalytic subunit gamma isoform (PI3-kinase subunit gamma) (PI3K-gamma) (PI3Kgamma) (PtdIns-3-kinase subunit gamma) (EC 2.7.1.153) (Phosphatidylinositol 4,5-bisphosphate 3-kinase 110 kDa catalytic subunit gamma) (PtdIns-3-kinase subunit p110-gamma) (p110gamma) (Phosphoinositide-3-kinase catalytic gamma polypeptide) (Serine/threonine protein kinase PI…	PIK3CG	Homo sapiens (Human)	2.7.1.153; 2.7.11.1	['metastatic breast cancer', 'lymphoma', 'solid tumors', "advanced solid tumours; non-hodgkin's lymphoma", 'cancer', 'advanced solid tumours; advanced breast cancer', 'myeloma (see also lymphoma)', 'metastatic solid tumors', 'thrombosis', 'advanced solid tumours; metastatic breast cancer; endometrial cancer; lymphoma', 'angioedema, myocardial infarction', 'advanced solid tumours', "advanced solid…
Raltitrexed	DAP000759	3ma3-01I	0.78	0.75	0.77	0.18	-7.3	-9	0.4	P11309	PIM1_HUMAN	Serine/threonine-protein kinase pim-1 (EC 2.7.11.1)	PIM1	Homo sapiens (Human)	2.7.11.1	['myeloma']
Raltitrexed	DAP000759	2vcj-2EQ	0.83	0.7	0.76	0.23	-8.1	-9.3	1.6	P07900	HS90A_HUMAN	Heat shock protein HSP 90-alpha (Heat shock 86 kDa) (HSP 86) (HSP86) (Lipopolysaccharide-associated protein 2) (LAP-2) (LPS-associated protein 2) (Renal carcinoma antigen NY-REN-38)	HSP90AA1 HSP90A HSPC1 HSPCA	Homo sapiens (Human)		['breast cancer, melanoma', 'solid tumors', 'ovarian cancer, refractory hematological malignancies', 'solid tumors, chronic myelogenous leukemia', 'refractory acute myelogenous leukemia; her2-positive metastatic breast cancer and leukaemia', 'gastrointestinal stromal tumors', 'multiple myeloma', 'non-small cell lung cancer', 'hematological malignancies', 'cancer/tumors', 'prostate cancer']
Raltitrexed	DAP000759	1di9-MSQ	0.74	0.78	0.76	0.18	-7.4	-6.1	0.6	Q16539	MK14_HUMAN	Mitogen-activated protein kinase 14 (MAP kinase 14) (MAPK 14) (EC 2.7.11.24) (Cytokine suppressive anti-inflammatory drug-binding protein) (CSAID-binding protein) (CSBP) (MAP kinase MXI2) (MAX-interacting protein 2) (Mitogen-activated protein kinase p38 alpha) (MAP kinase p38 alpha) (Stress-activated protein kinase 2a) (SAPK2a)	MAPK14 CSBP CSBP1 CSBP2 CSPB1 MXI2 SAPK2A	Homo sapiens (Human)	2.7.11.24	['cardiovascular disease, copd and depression', 'pain', 'copd', 'acute lung injury & acute respiratory distress syndrome']
Raltitrexed	DAP000759	2xez-XEZ	0.71	0.76	0.74	0.11	-6.8	-7	1.4	O14757	CHK1_HUMAN	Serine/threonine-protein kinase Chk1 (EC 2.7.11.1) (CHK1 checkpoint homolog) (Cell cycle checkpoint kinase) (Checkpoint kinase-1)	CHEK1 CHK1	Homo sapiens (Human)	2.7.11.1	['lymphoma', 'leukaemia and mds; solid tumours; lymphoma and solid tumours', 'cancer', 'rcc, melanoma and lymphoma; sclc', 'ancreatic cancer and non-small cell lung cancer', 'advanced solid tumours or lymphoma', 'solid tumors', 'solid tumors or lymphoma', 'solid tumours; advanced solid malignancies', 'pancreatic cancer', 'non-small cell lung carcinoma', 'advanced solid tumours in combination with…
Sorafenib	DAP000006	1oec-AA2	0.93	0.92	0.93	0.17	-7.6	-7.7	2	P21802	FGFR2_HUMAN	Fibroblast growth factor receptor 2 (FGFR-2) (EC 2.7.10.1) (K-sam) (KGFR) (Keratinocyte growth factor receptor) (CD antigen CD332)	FGFR2 BEK KGFR KSAM	Homo sapiens (Human)	2.7.10.1	['chronic hepatitis c', 'oral mucositis', 'solid tumours', 'periodontitis', 'interstitial cystitis/painful bladder syndrome']	DISEASE: Crouzon syndrome (CS) [MIM:123500]: An autosomal dominant syndrome characterized by craniosynostosis, hypertelorism, exophthalmos and external strabismus, parrot-beaked nose, short upper lip, hypoplastic maxilla, and a relative mandibular prognathism. {ECO:0000269|PubMed:10574673, ECO:0000269|PubMed:11173845, ECO:0000269|PubMed:11380921, ECO:0000269|PubMed:11781872, ECO:0000269|PubMed:75…
Sorafenib	DAP000006	1y57-MPZ	0.94	0.9	0.92	0.26	-7.3	-8.1	3.3	P12931	SRC_HUMAN	Proto-oncogene tyrosine-protein kinase Src (EC 2.7.10.2) (Proto-oncogene c-Src) (pp60c-src) (p60-Src)	SRC SRC1	Homo sapiens (Human)	2.7.10.2	['advanced breast cancer', 'cancer', 'acute myeloid leukemia', 'chronic myelogenous leukemia', 'osteosarcoma; hematological malignancies, solid tumours', 'solid tumours, multiple myeloma', 'aml, cml']	DISEASE: Note=SRC kinase activity has been shown to be increased in several tumor tissues and tumor cell lines such as colon carcinoma cells.
Sorafenib	DAP000006	1uwh-BAX	0.93	0.9	0.92	1	-12.4	-11.8	1.5	P15056	BRAF_HUMAN	Serine/threonine-protein kinase B-raf (EC 2.7.11.1) (Proto-oncogene B-Raf) (p94) (v-Raf murine sarcoma viral oncogene homolog B1)	BRAF BRAF1 RAFB1	Homo sapiens (Human)	2.7.11.1	['non-small cell lung cancer', 'colorectal cancer', 'advanced renal cell carcinoma', 'malignant melanoma', 'metastatic melanoma', 'adjuvant metastatic melanoma, braf mutation positive', 'throid cancer', 'metastatic melanoma, adjuvant therapy', 'metastatic melanoma, braf mutation positive', 'metastatic melanoma, solid tumors', 'hepatocellular carcinoma, nsclc, melanoma', 'braf-positive unresectabl…	DISEASE: Note=Defects in BRAF are found in a wide range of cancers. {ECO:0000269|PubMed:18974108}.; DISEASE: Colorectal cancer (CRC) [MIM:114500]: A complex disease characterized by malignant lesions arising from the inner wall of the large intestine (the colon) and the rectum. Genetic alterations are often associated with progression from premalignant lesion (adenoma) to invasive adenocarcinoma.…
Sorafenib	DAP000006	3hmi-DKI	0.92	0.9	0.91	0.21	-9.9	-6.4	8.5	P42684	ABL2_HUMAN	Abelson tyrosine-protein kinase 2 (EC 2.7.10.2) (Abelson murine leukemia viral oncogene homolog 2) (Abelson-related gene protein) (Tyrosine-protein kinase ARG)	ABL2 ABLL ARG	Homo sapiens (Human)	2.7.10.2	['advanced breast cancer', 'intestinal cancer & myeloid leukemia', 'dietary shortage', 'chronic myelogenous leukemia', 'leukemia', 'osteosarcoma; hematological malignancies, solid tumours', 'all, cml, gist', 'solid tumours, multiple myeloma', 'glioma, lung, prostate, solid tumours']
Sorafenib	DAP000006	2oh4-GIG	0.97	0.85	0.91	0.49	-10.8	-12	0.7	P35968	VGFR2_HUMAN	Vascular endothelial growth factor receptor 2 (VEGFR-2) (EC 2.7.10.1) (Fetal liver kinase 1) (FLK-1) (Kinase insert domain receptor) (KDR) (Protein-tyrosine kinase receptor flk-1) (CD antigen CD309)	KDR FLK1 VEGFR2	Homo sapiens (Human)	2.7.10.1	['metastatic breast cancer', 'a variety of cancers, such as metastatic breast, colorectal and gastric cancers', 'advanced breast cancer', 'cancer', 'ovarian cancer', 'renal cell carcinoma', 'various cancers', 'non-small cell lung cancer', 'carcinoma, non-small-cell lung', 'metastatic castration-resistant prostate cancer, ovarian cancer', 'solid tumors', 'medullary thyroid cancer', 'advanced renal…	DISEASE: Hemangioma, capillary infantile (HCI) [MIM:602089]: A condition characterized by dull red, firm, dome-shaped hemangiomas, sharply demarcated from surrounding skin, usually presenting at birth or occurring within the first two or three months of life. They result from highly proliferative, localized growth of capillary endothelium and generally undergo regression and involution without sc…
Sorafenib	DAP000006	2oj9-BMI	0.95	0.83	0.89	0.25	-7.9	-9.5	0.9	P08069	IGF1R_HUMAN	Insulin-like growth factor 1 receptor (EC 2.7.10.1) (Insulin-like growth factor I receptor) (IGF-I receptor) (CD antigen CD221) [Cleaved into: Insulin-like growth factor 1 receptor alpha chain; Insulin-like growth factor 1 receptor beta chain]	IGF1R	Homo sapiens (Human)	2.7.10.1	['igf-1 deficiency', 'cancer', 'various cancers, multiple myeloma', "nsclc, ewing's sarcoma and metastatic breast cancer", 'multiple myeloma', 'non-small cell lung cancer (biologic)', 'cancers', 'on-small cell lung cancer', "gastrointestinal cancers; genitourinary; ewing's sarcoma; small cell lung cancer; breast cancer (biologic)"]	DISEASE: Insulin-like growth factor 1 resistance (IGF1RES) [MIM:270450]: A disorder characterized by intrauterine growth retardation, poor postnatal growth and increased plasma IGF1 levels. {ECO:0000269|PubMed:14657428, ECO:0000269|PubMed:15928254}. Note=The disease is caused by mutations affecting the gene represented in this entry.
Sorafenib	DAP000006	3owh-52X	0.81	0.95	0.88	0.15	-8.8	-7.4	2.6	P16083	NQO2_HUMAN	Ribosyldihydronicotinamide dehydrogenase [quinone] (EC 1.10.99.2) (NRH dehydrogenase [quinone] 2) (NRH:quinone oxidoreductase 2) (Quinone reductase 2) (QR2)	NQO2 NMOR2	Homo sapiens (Human)	1.10.99.2	['cancer/tumors']
Sorafenib	DAP000006	1u71-MXA	0.84	0.9	0.87	0.15	-7.6	-8.6	0.4	P00374	DYR_HUMAN	Dihydrofolate reductase (EC 1.5.1.3)	DHFR	Homo sapiens (Human)	1.5.1.3	['gram-positive and -negative bacterial infections', 'malaria and bacterial infections', 'malaria', 'leukemia', 'plasmodium falciparum', 'peripheral t cell lymphoma', 'bacterial infections', 'urinary tract infections', 'acute malaria', 'pneumocystis pneumonia (pcp)', 'advanced cancer']	DISEASE: Megaloblastic anemia due to dihydrofolate reductase deficiency (DHFRD) [MIM:613839]: An inborn error of metabolism, characterized by megaloblastic anemia and/or pancytopenia, severe cerebral folate deficiency, and cerebral tetrahydrobiopterin deficiency. Clinical features include variable neurologic symptoms, ranging from severe developmental delay and generalized seizures in infancy, to…
Sorafenib	DAP000006	2w1f-L0F	0.83	0.9	0.87	0.24	-7.8	-8.1	2	O14965	AURKA_HUMAN	Aurora kinase A (EC 2.7.11.1) (Aurora 2) (Aurora/IPL1-related kinase 1) (ARK-1) (Aurora-related kinase 1) (hARK1) (Breast tumor-amplified kinase) (Serine/threonine-protein kinase 15) (Serine/threonine-protein kinase 6) (Serine/threonine-protein kinase aurora-A)	AURKA AIK AIRK1 ARK1 AURA AYK1 BTAK IAK1 STK15 STK6	Homo sapiens (Human)	2.7.11.1	['chronic myelogenous leukemia; leukemia; lymphoblastic, acute, philadelphia-positive', 'paediatric solid tumours or all', 'advanced malignancies', 'solid tumors', 'cml that relapsed after imatinib or bcr\xe2\x80\x93abl-targeted therapy; metastatic hormone refractory prostate cancer (mhrpc)', 'leukemia, myeloid', 'ovarian cancer, fallopian cancer, peritoneal cancer', 'leukemia', 'haematological m…
Sorafenib	DAP000006	1tym-TYL	0.78	0.9	0.84	0.08	-5.3	-4.1	0.7	P01308	INS_HUMAN	Insulin [Cleaved into: Insulin B chain; Insulin A chain]	INS	Homo sapiens (Human)		['type 2 diabetes']	DISEASE: Hyperproinsulinemia, familial (FHPRI) [MIM:176730]: An autosomal dominant condition characterized by elevated levels of serum proinsulin-like material. {ECO:0000269|PubMed:1601997, ECO:0000269|PubMed:2196279, ECO:0000269|PubMed:3470784, ECO:0000269|PubMed:4019786}. Note=The disease is caused by mutations affecting the gene represented in this entry.; DISEASE: Diabetes mellitus, insulin-d…
Sorafenib	DAP000006	3l8p-0CE	0.74	0.9	0.82	0.13	-10.7	-13.3	0.6	Q02763	TIE2_HUMAN	Angiopoietin-1 receptor (EC 2.7.10.1) (Endothelial tyrosine kinase) (Tunica interna endothelial cell kinase) (Tyrosine kinase with Ig and EGF homology domains-2) (Tyrosine-protein kinase receptor TEK) (Tyrosine-protein kinase receptor TIE-2) (hTIE2) (p140 TEK) (CD antigen CD202b)	TEK TIE2 VMCM VMCM1	Homo sapiens (Human)	2.7.10.1	['pancreastic cancer, prostate cancer & solid tumours', 'solid tumors', 'diabetic macular edema', 'myelodysplastic syndromes']	DISEASE: Dominantly inherited venous malformations (VMCM) [MIM:600195]: An error of vascular morphogenesis characterized by dilated, serpiginous channels. {ECO:0000269|PubMed:10369874, ECO:0000269|PubMed:19888299, ECO:0000269|PubMed:8980225}. Note=The disease is caused by mutations affecting the gene represented in this entry.; DISEASE: Note=May play a role in a range of diseases with a vascular …
Streptozocin; streptozotocin; STZ	DAP000984	3kku-B95	0.71	0.96	0.84	0.02	-5.1	-5	2.5	P25779	CYSP_TRYCR	Cruzipain (EC 3.4.22.51) (Cruzaine) (Major cysteine proteinase)		Trypanosoma cruzi	3.4.22.51	['p. falciparum']
Streptozocin; streptozotocin; STZ	DAP000984	1yry-MSG	0.82	0.81	0.82	0.25	-6.6	-6.1	1.7	P00491	PNPH_HUMAN	Purine nucleoside phosphorylase (PNP) (EC 2.4.2.1) (Inosine phosphorylase) (Inosine-guanosine phosphorylase)	PNP NP	Homo sapiens (Human)	2.4.2.1	['moderate to severe plaque psoriasis', 'psoriasis, cutaneous t-cell lymphoma', 'refractory cutaneous t-cell lymphoma, b cell acute lymphoblastic leukemia']	DISEASE: Purine nucleoside phosphorylase deficiency (PNPD) [MIM:613179]: A disorder that interrupts both the catabolism of inosine into hypoxanthine and guanosine into guanine, and leads to the accumulation of guanosine, inosine, and their deoxified by-products. The main clinical presentation is recurrent infections due to severe T-cell immunodeficiency. Some patients also have neurologic impairm…
Sunitinib malate; SU11248	DCL000646	1el3-I84	0.9	0.74	0.82	0.3	-7.3	-7.7	4.8	P15121	ALDR_HUMAN	Aldose reductase (AR) (EC 1.1.1.21) (Aldehyde reductase) (Aldo-keto reductase family 1 member B1)	AKR1B1 ALDR1	Homo sapiens (Human)	1.1.1.21	['rheumatoid arthritis', 'diabetic neuropathy', 'diabetes']
Sunitinib malate; SU11248	DCL000646	2roy-P28	0.8	0.79	0.8	0.15	-5.3	-5.4	2.1	P02766	TTHY_HUMAN	Transthyretin (ATTR) (Prealbumin) (TBPA)	TTR PALB	Homo sapiens (Human)		['amyloidosis', 'ttr amyloidosis']	DISEASE: Amyloidosis, transthyretin-related (AMYL-TTR) [MIM:105210]: A hereditary generalized amyloidosis due to transthyretin amyloid deposition. Protein fibrils can form in different tissues leading to amyloid polyneuropathies, amyloidotic cardiomyopathy, carpal tunnel syndrome, systemic senile amyloidosis. The disease includes leptomeningeal amyloidosis that is characterized by primary involve…
Sunitinib malate; SU11248	DCL000646	3lxp-IZA	0.89	0.7	0.79	0.24	-8.5	-11.3	0.2	P29597	TYK2_HUMAN	Non-receptor tyrosine-protein kinase TYK2 (EC 2.7.10.2)	TYK2	Homo sapiens (Human)	2.7.10.2	['solid tumors']	DISEASE: Immunodeficiency 35 (IMD35) [MIM:611521]: A primary immunodeficiency characterized by recurrent skin abscesses, pneumonia, and highly elevated serum IgE. {ECO:0000269|PubMed:17088085}. Note=The disease is caused by mutations affecting the gene represented in this entry.
Sunitinib malate; SU11248	DCL000646	3nox-6A5	0.88	0.7	0.79	0.29	-7.2	-8	0.3	P27487	DPP4_HUMAN	Dipeptidyl peptidase 4 (EC 3.4.14.5) (ADABP) (Adenosine deaminase complexing protein 2) (ADCP-2) (Dipeptidyl peptidase IV) (DPP IV) (T-cell activation antigen CD26) (TP103) (CD antigen CD26) [Cleaved into: Dipeptidyl peptidase 4 membrane form (Dipeptidyl peptidase IV membrane form); Dipeptidyl peptidase 4 soluble form (Dipeptidyl peptidase IV soluble form)]	DPP4 ADCP2 CD26	Homo sapiens (Human)	3.4.14.5	['diabetes mellitus', 'type 2 diabetes', 'diabetes mellitus type ii', 'diabetes', 'hyperglycaemia in type 2 diabetes mellitus']
Sunitinib malate; SU11248	DCL000646	2jav-5Z5	0.75	0.79	0.77	0.48	-8.1	-8.7	0.6	P51955	NEK2_HUMAN	Serine/threonine-protein kinase Nek2 (EC 2.7.11.1) (HSPK 21) (Never in mitosis A-related kinase 2) (NimA-related protein kinase 2) (NimA-like protein kinase 1)	NEK2 NEK2A NLK1	Homo sapiens (Human)	2.7.11.1	[]	DISEASE: Retinitis pigmentosa 67 (RP67) [MIM:615565]: A retinal dystrophy belonging to the group of pigmentary retinopathies. Retinitis pigmentosa is characterized by retinal pigment deposits visible on fundus examination and primary loss of rod photoreceptor cells followed by secondary loss of cone photoreceptors. Patients typically have night vision blindness and loss of midperipheral visual fi…
Sunitinib malate; SU11248	DCL000646	2np8-CC3	0.7	0.8	0.75	0.18	-7.1	-8.6	3.8	O14965	AURKA_HUMAN	Aurora kinase A (EC 2.7.11.1) (Aurora 2) (Aurora/IPL1-related kinase 1) (ARK-1) (Aurora-related kinase 1) (hARK1) (Breast tumor-amplified kinase) (Serine/threonine-protein kinase 15) (Serine/threonine-protein kinase 6) (Serine/threonine-protein kinase aurora-A)	AURKA AIK AIRK1 ARK1 AURA AYK1 BTAK IAK1 STK15 STK6	Homo sapiens (Human)	2.7.11.1	['chronic myelogenous leukemia; leukemia; lymphoblastic, acute, philadelphia-positive', 'paediatric solid tumours or all', 'advanced malignancies', 'solid tumors', 'cml that relapsed after imatinib or bcr\xe2\x80\x93abl-targeted therapy; metastatic hormone refractory prostate cancer (mhrpc)', 'leukemia, myeloid', 'ovarian cancer, fallopian cancer, peritoneal cancer', 'leukemia', 'haematological m…
Teniposide; VM-26	DAP000651	2b37-8PS	0.74	0.85	0.79	0.11	-7.4	-6	3.7	P0A5Y6	INHA_MYCTU	Enoyl-[acyl-carrier-protein] reductase [NADH] (EC 1.3.1.9) (NADH-dependent enoyl-ACP reductase)	inhA Rv1484 MTCY277.05	Mycobacterium tuberculosis (strain ATCC 25618 / H37Rv)	2.5.1.86; 2.5.1.87	['tuberculosis']
Teniposide; VM-26	DAP000651	3msl-EV5	0.74	0.84	0.79	0.09	-7.8	-6.7	2.7	P56817	BACE1_HUMAN	Beta-secretase 1 (EC 3.4.23.46) (Aspartyl protease 2) (ASP2) (Asp 2) (Beta-site amyloid precursor protein cleaving enzyme 1) (Beta-site APP cleaving enzyme 1) (Memapsin-2) (Membrane-associated aspartic protease 2)	BACE1 BACE KIAA1149	Homo sapiens (Human)	3.4.23.46	["alzheimer's disease"]
Topotecan HCl	DAP000648	2wi7-2KL	0.79	0.77	0.78	0.25	-8	-7.7	1.8	P07900	HS90A_HUMAN	Heat shock protein HSP 90-alpha (Heat shock 86 kDa) (HSP 86) (HSP86) (Lipopolysaccharide-associated protein 2) (LAP-2) (LPS-associated protein 2) (Renal carcinoma antigen NY-REN-38)	HSP90AA1 HSP90A HSPC1 HSPCA	Homo sapiens (Human)		['breast cancer, melanoma', 'solid tumors', 'ovarian cancer, refractory hematological malignancies', 'solid tumors, chronic myelogenous leukemia', 'refractory acute myelogenous leukemia; her2-positive metastatic breast cancer and leukaemia', 'gastrointestinal stromal tumors', 'multiple myeloma', 'non-small cell lung cancer', 'hematological malignancies', 'cancer/tumors', 'prostate cancer']
Topotecan HCl	DAP000648	1tym-TYL	0.73	0.79	0.76	0.07	-5.4	-4.1	0.7	P01308	INS_HUMAN	Insulin [Cleaved into: Insulin B chain; Insulin A chain]	INS	Homo sapiens (Human)		['type 2 diabetes']	DISEASE: Hyperproinsulinemia, familial (FHPRI) [MIM:176730]: An autosomal dominant condition characterized by elevated levels of serum proinsulin-like material. {ECO:0000269|PubMed:1601997, ECO:0000269|PubMed:2196279, ECO:0000269|PubMed:3470784, ECO:0000269|PubMed:4019786}. Note=The disease is caused by mutations affecting the gene represented in this entry.; DISEASE: Diabetes mellitus, insulin-d…
Topotecan HCl	DAP000648	1bmk-SB5	0.67	0.77	0.72	0.19	-6.4	-7.5	0.7	Q16539	MK14_HUMAN	Mitogen-activated protein kinase 14 (MAP kinase 14) (MAPK 14) (EC 2.7.11.24) (Cytokine suppressive anti-inflammatory drug-binding protein) (CSAID-binding protein) (CSBP) (MAP kinase MXI2) (MAX-interacting protein 2) (Mitogen-activated protein kinase p38 alpha) (MAP kinase p38 alpha) (Stress-activated protein kinase 2a) (SAPK2a)	MAPK14 CSBP CSBP1 CSBP2 CSPB1 MXI2 SAPK2A	Homo sapiens (Human)	2.7.11.24	['cardiovascular disease, copd and depression', 'pain', 'copd', 'acute lung injury & acute respiratory distress syndrome']
Valrubicin	DAP000650	2v3e-NND	0.93	0.82	0.88	0.07	-8.1	-6.5	1.3	P04062	GLCM_HUMAN	Glucosylceramidase (EC 3.2.1.45) (Acid beta-glucosidase) (Alglucerase) (Beta-glucocerebrosidase) (Beta-GC) (D-glucosyl-N-acylsphingosine glucohydrolase) (Imiglucerase)	GBA GC GLUC	Homo sapiens (Human)	3.2.1.45	['metabolic disease']	DISEASE: Gaucher disease (GD) [MIM:230800]: A lysosomal storage disease due to deficient activity of beta-glucocerebrosidase and characterized by accumulation of glucosylceramide in the reticulo-endothelial system. Different clinical forms are recognized depending on the presence (neuronopathic forms) or absence of central nervous system involvement, severity and age of onset. {ECO:0000269|PubMed…
Valrubicin	DAP000650	1kvl-THN	0.84	0.88	0.86	0.09	-7	-6.8	1.2	P00811	AMPC_ECOLI	Beta-lactamase (EC 3.5.2.6) (Cephalosporinase)	ampC ampA b4150 JW4111	Escherichia coli (strain K12)	3.5.2.6	['mrsa', 'gram-positive and -negative bacterial infections', 'bacterial infections', 'serious infections', 'infection']
Valrubicin	DAP000650	3ofi-MET_GLN_ILE	0.82	0.88	0.85	0.12	-6.4	-5.3	2.2	P14735	IDE_HUMAN	Insulin-degrading enzyme (EC 3.4.24.56) (Abeta-degrading protease) (Insulin protease) (Insulinase) (Insulysin)	IDE	Homo sapiens (Human)	3.4.24.56	['bacterial infection']
Valrubicin	DAP000650	2bel-CBO	0.92	0.77	0.85	0.23	-8.3	-12.5	1.3	P28845	DHI1_HUMAN	Corticosteroid 11-beta-dehydrogenase isozyme 1 (EC 1.1.1.146) (11-beta-hydroxysteroid dehydrogenase 1) (11-DH) (11-beta-HSD1)	HSD11B1 HSD11 HSD11L	Homo sapiens (Human)	1.1.1.146	['type 2 diabetes', 'diabetes mellitus type 1', 'diabetes mellitus type 2', 'diabetes, obesity', 'hypercholesterolemia', 'diabetes mellitus type 2/obesity']	DISEASE: Cortisone reductase deficiency (CRD) [MIM:604931]: In CRD, activation of cortisone to cortisol does not occur, resulting in adrenocorticotropin-mediated androgen excess and a phenotype resembling polycystic ovary syndrome (PCOS). Note=The disease is caused by mutations affecting the gene represented in this entry.
Valrubicin	DAP000650	3fzl-3FD	0.92	0.74	0.83	0.13	-8.2	-7.7	1.3	P11142	HSP7C_HUMAN	Heat shock cognate 71 kDa protein (Heat shock 70 kDa protein 8) (Lipopolysaccharide-associated protein 1) (LAP-1) (LPS-associated protein 1)	HSPA8 HSC70 HSP73 HSPA10	Homo sapiens (Human)		['bacterial infection']
Valrubicin	DAP000650	2j91-AMP	0.93	0.73	0.83	0.06	-6.9	-7	4.4	P30566	PUR8_HUMAN	Adenylosuccinate lyase (ASL) (EC 4.3.2.2) (Adenylosuccinase) (ASase)	ADSL AMPS	Homo sapiens (Human)	4.3.2.2	[]	DISEASE: Adenylosuccinase deficiency (ADSL deficiency) [MIM:103050]: An autosomal recessive disorder characterized by the accumulation in the body fluids of succinylaminoimidazole-carboxamide riboside (SAICA-riboside) and succinyladenosine (S-Ado). Most children display marked psychomotor delay, often accompanied by epilepsy or autistic features, or both, although some patients may be less profou…
Vindesine; VDS	DAP000949	2j50-627	0.93	0.87	0.9	0.2	-7.7	-9.5	1	O14965	AURKA_HUMAN	Aurora kinase A (EC 2.7.11.1) (Aurora 2) (Aurora/IPL1-related kinase 1) (ARK-1) (Aurora-related kinase 1) (hARK1) (Breast tumor-amplified kinase) (Serine/threonine-protein kinase 15) (Serine/threonine-protein kinase 6) (Serine/threonine-protein kinase aurora-A)	AURKA AIK AIRK1 ARK1 AURA AYK1 BTAK IAK1 STK15 STK6	Homo sapiens (Human)	2.7.11.1	['chronic myelogenous leukemia; leukemia; lymphoblastic, acute, philadelphia-positive', 'paediatric solid tumours or all', 'advanced malignancies', 'solid tumors', 'cml that relapsed after imatinib or bcr\xe2\x80\x93abl-targeted therapy; metastatic hormone refractory prostate cancer (mhrpc)', 'leukemia, myeloid', 'ovarian cancer, fallopian cancer, peritoneal cancer', 'leukemia', 'haematological m…
Vindesine; VDS	DAP000949	1y57-MPZ	0.83	0.9	0.87	0.15	-6.7	-8.1	3.3	P12931	SRC_HUMAN	Proto-oncogene tyrosine-protein kinase Src (EC 2.7.10.2) (Proto-oncogene c-Src) (pp60c-src) (p60-Src)	SRC SRC1	Homo sapiens (Human)	2.7.10.2	['advanced breast cancer', 'cancer', 'acute myeloid leukemia', 'chronic myelogenous leukemia', 'osteosarcoma; hematological malignancies, solid tumours', 'solid tumours, multiple myeloma', 'aml, cml']	DISEASE: Note=SRC kinase activity has been shown to be increased in several tumor tissues and tumor cell lines such as colon carcinoma cells.
Vindesine; VDS	DAP000949	3f5p-741	0.93	0.78	0.86	0.18	-5.8	-6.7	1.7	P08069	IGF1R_HUMAN	Insulin-like growth factor 1 receptor (EC 2.7.10.1) (Insulin-like growth factor I receptor) (IGF-I receptor) (CD antigen CD221) [Cleaved into: Insulin-like growth factor 1 receptor alpha chain; Insulin-like growth factor 1 receptor beta chain]	IGF1R	Homo sapiens (Human)	2.7.10.1	['igf-1 deficiency', 'cancer', 'various cancers, multiple myeloma', "nsclc, ewing's sarcoma and metastatic breast cancer", 'multiple myeloma', 'non-small cell lung cancer (biologic)', 'cancers', 'on-small cell lung cancer', "gastrointestinal cancers; genitourinary; ewing's sarcoma; small cell lung cancer; breast cancer (biologic)"]	DISEASE: Insulin-like growth factor 1 resistance (IGF1RES) [MIM:270450]: A disorder characterized by intrauterine growth retardation, poor postnatal growth and increased plasma IGF1 levels. {ECO:0000269|PubMed:14657428, ECO:0000269|PubMed:15928254}. Note=The disease is caused by mutations affecting the gene represented in this entry.
Vindesine; VDS	DAP000949	2fgi-PD1	0.93	0.75	0.84	0.18	-6.8	-7.6	1.3	P11362	FGFR1_HUMAN	Fibroblast growth factor receptor 1 (FGFR-1) (EC 2.7.10.1) (Basic fibroblast growth factor receptor 1) (BFGFR) (bFGF-R-1) (Fms-like tyrosine kinase 2) (FLT-2) (N-sam) (Proto-oncogene c-Fgr) (CD antigen CD331)	FGFR1 BFGFR CEK FGFBR FLG FLT2 HBGFR	Homo sapiens (Human)	2.7.10.1	['solid tumors', 'metastatic colorectal cancer', 'severe coronary heart disease', 'ovarian cancer', 'advanced solid tumours', 'non-small cell lung cancer (nsclc)', 'first-line liver cancer, liver cancer (tace) (see also colorectal, sarcoma)', 'sarcoma', 'lymphoma', 'peripheral vascular disease, ulcers', 'solid tumours']	DISEASE: Pfeiffer syndrome (PS) [MIM:101600]: A syndrome characterized by the association of craniosynostosis, broad and deviated thumbs and big toes, and partial syndactyly of the fingers and toes. Three subtypes are known: mild autosomal dominant form (type 1); cloverleaf skull, elbow ankylosis, early death, sporadic (type 2); craniosynostosis, early demise, sporadic (type 3). {ECO:0000269|PubM…
Vindesine; VDS	DAP000949	3fzp-AGS	0.97	0.66	0.82	0.07	-5.6	-7.3	3.4	Q14289	FAK2_HUMAN	Protein-tyrosine kinase 2-beta (EC 2.7.10.2) (Calcium-dependent tyrosine kinase) (CADTK) (Calcium-regulated non-receptor proline-rich tyrosine kinase) (Cell adhesion kinase beta) (CAK-beta) (CAKB) (Focal adhesion kinase 2) (FADK 2) (Proline-rich tyrosine kinase 2) (Related adhesion focal tyrosine kinase) (RAFTK)	PTK2B FAK2 PYK2 RAFTK	Homo sapiens (Human)	2.7.10.2	[]	DISEASE: Note=Aberrant PTK2B/PYK2 expression may play a role in cancer cell proliferation, migration and invasion, in tumor formation and metastasis. Elevated PTK2B/PYK2 expression is seen in gliomas, hepatocellular carcinoma, lung cancer and breast cancer.
Vinorelbine; VRLB; navelvine	DAP000765	1y57-MPZ	0.87	0.91	0.89	0.16	-7.9	-8.1	3.3	P12931	SRC_HUMAN	Proto-oncogene tyrosine-protein kinase Src (EC 2.7.10.2) (Proto-oncogene c-Src) (pp60c-src) (p60-Src)	SRC SRC1	Homo sapiens (Human)	2.7.10.2	['advanced breast cancer', 'cancer', 'acute myeloid leukemia', 'chronic myelogenous leukemia', 'osteosarcoma; hematological malignancies, solid tumours', 'solid tumours, multiple myeloma', 'aml, cml']	DISEASE: Note=SRC kinase activity has been shown to be increased in several tumor tissues and tumor cell lines such as colon carcinoma cells.
Vinorelbine; VRLB; navelvine	DAP000765	2rgu-356	0.96	0.81	0.89	0.17	-8.3	-8.7	2	P27487	DPP4_HUMAN	Dipeptidyl peptidase 4 (EC 3.4.14.5) (ADABP) (Adenosine deaminase complexing protein 2) (ADCP-2) (Dipeptidyl peptidase IV) (DPP IV) (T-cell activation antigen CD26) (TP103) (CD antigen CD26) [Cleaved into: Dipeptidyl peptidase 4 membrane form (Dipeptidyl peptidase IV membrane form); Dipeptidyl peptidase 4 soluble form (Dipeptidyl peptidase IV soluble form)]	DPP4 ADCP2 CD26	Homo sapiens (Human)	3.4.14.5	['diabetes mellitus', 'type 2 diabetes', 'diabetes mellitus type ii', 'diabetes', 'hyperglycaemia in type 2 diabetes mellitus']
Vinorelbine; VRLB; navelvine	DAP000765	3fzp-AGS	0.97	0.69	0.83	0.05	-6.3	-7.3	3.4	Q14289	FAK2_HUMAN	Protein-tyrosine kinase 2-beta (EC 2.7.10.2) (Calcium-dependent tyrosine kinase) (CADTK) (Calcium-regulated non-receptor proline-rich tyrosine kinase) (Cell adhesion kinase beta) (CAK-beta) (CAKB) (Focal adhesion kinase 2) (FADK 2) (Proline-rich tyrosine kinase 2) (Related adhesion focal tyrosine kinase) (RAFTK)	PTK2B FAK2 PYK2 RAFTK	Homo sapiens (Human)	2.7.10.2	[]	DISEASE: Note=Aberrant PTK2B/PYK2 expression may play a role in cancer cell proliferation, migration and invasion, in tumor formation and metastasis. Elevated PTK2B/PYK2 expression is seen in gliomas, hepatocellular carcinoma, lung cancer and breast cancer.
Zinostatin stimalamer	DNAP001419	2bel-CBO	0.88	0.76	0.82	0.13	-11	-12.5	1.3	P28845	DHI1_HUMAN	Corticosteroid 11-beta-dehydrogenase isozyme 1 (EC 1.1.1.146) (11-beta-hydroxysteroid dehydrogenase 1) (11-DH) (11-beta-HSD1)	HSD11B1 HSD11 HSD11L	Homo sapiens (Human)	1.1.1.146	['type 2 diabetes', 'diabetes mellitus type 1', 'diabetes mellitus type 2', 'diabetes, obesity', 'hypercholesterolemia', 'diabetes mellitus type 2/obesity']	DISEASE: Cortisone reductase deficiency (CRD) [MIM:604931]: In CRD, activation of cortisone to cortisol does not occur, resulting in adrenocorticotropin-mediated androgen excess and a phenotype resembling polycystic ovary syndrome (PCOS). Note=The disease is caused by mutations affecting the gene represented in this entry.
Zinostatin stimalamer	DNAP001419	3g4i-D71	0.82	0.79	0.8	0.08	-9.4	-9.2	1	Q08499	PDE4D_HUMAN	cAMP-specific 3',5'-cyclic phosphodiesterase 4D (EC 3.1.4.53) (DPDE3) (PDE43)	PDE4D DPDE3	Homo sapiens (Human)	3.1.4.53	['psoriasis', 'atopic dermatitis', 'psoriasis and psoriatic disorders', 'emphysema, bronchitis, chronic obstructive pulmonary disease', 'chronic obstructive pulmonary disease', 'atopic dermatitis (ad)', 'cough']	DISEASE: Note=Genetic variations in PDE4D might be associated with susceptibility to stroke. PubMed:17006457 states that association with stroke has to be considered with caution.; DISEASE: Acrodysostosis 2, with or without hormone resistance (ACRDYS2) [MIM:614613]: A pleiotropic disorder characterized by skeletal, endocrine, and neurological abnormalities. Skeletal features include brachycephaly…
Zinostatin stimalamer	DNAP001419	3owh-52X	0.77	0.78	0.78	0.08	-10.7	-7.4	2.6	P16083	NQO2_HUMAN	Ribosyldihydronicotinamide dehydrogenase [quinone] (EC 1.10.99.2) (NRH dehydrogenase [quinone] 2) (NRH:quinone oxidoreductase 2) (Quinone reductase 2) (QR2)	NQO2 NMOR2	Homo sapiens (Human)	1.10.99.2	['cancer/tumors']
Zinostatin stimalamer	DNAP001419	2r9w-23C	0.74	0.78	0.76	0.12	-8.1	-8.9	0.9	P00811	AMPC_ECOLI	Beta-lactamase (EC 3.5.2.6) (Cephalosporinase)	ampC ampA b4150 JW4111	Escherichia coli (strain K12)	3.5.2.6	['mrsa', 'gram-positive and -negative bacterial infections', 'bacterial infections', 'serious infections', 'infection']
Zinostatin stimalamer	DNAP001419	2np8-CC3	0.67	0.78	0.73	0.1	-9.1	-8.6	3.8	O14965	AURKA_HUMAN	Aurora kinase A (EC 2.7.11.1) (Aurora 2) (Aurora/IPL1-related kinase 1) (ARK-1) (Aurora-related kinase 1) (hARK1) (Breast tumor-amplified kinase) (Serine/threonine-protein kinase 15) (Serine/threonine-protein kinase 6) (Serine/threonine-protein kinase aurora-A)	AURKA AIK AIRK1 ARK1 AURA AYK1 BTAK IAK1 STK15 STK6	Homo sapiens (Human)	2.7.11.1	['chronic myelogenous leukemia; leukemia; lymphoblastic, acute, philadelphia-positive', 'paediatric solid tumours or all', 'advanced malignancies', 'solid tumors', 'cml that relapsed after imatinib or bcr\xe2\x80\x93abl-targeted therapy; metastatic hormone refractory prostate cancer (mhrpc)', 'leukemia, myeloid', 'ovarian cancer, fallopian cancer, peritoneal cancer', 'leukemia', 'haematological m…
