# Supplementary material for: An improved approach for predicting drug–target interaction: proteochemometrics to molecular docking
Source: Royal Society of Chemistry journal article supplement (doi:10.1039/c5mb00650c), 2016-01-19
Supplement: c5mb00650c2.csv [file c5mb00650c2.csv]

Generic Name	TTD ID	pdb-HET ID	APP	train_similarity	Dock score	Uniprot ID	Protein names	Organism	iso_smiles	ChEMBL ID	ChEBML_similarity	Bioactivity type	Operator	Value	Target confidence	Reference
Dasatinib	DAP000004	3lfa-1N1	0.94	1	-7.7	Q16539	Mitogen-activated protein kinase 14 (MAP kinase 14) (MAPK 14) (EC 2.7.11.24) (Cytokine suppressive anti-inflammatory drug-binding protein) (CSAID-binding protein) (CSBP) (MAP kinase MXI2) (MAX-interacting protein 2) (Mitogen-activated protein kinase p38 alpha) (MAP kinase p38 alpha) (Stress-activated protein kinase 2a) (SAPK2a)	Homo sapiens (Human)	CC1=C(C(=CC=C1)Cl)NC(=O)C2=CN=C(S2)NC3=NC(=NC(=C3)N4CCN(CC4)CCO)C	CHEMBL1421	100	Kd	=	27	9	Nat. Biotechnol., (2008) 26:1:127
Dasatinib	DAP000004	2w1e-L0E	0.85	0.32	-8.3	O14965	Aurora kinase A (EC 2.7.11.1) (Aurora 2) (Aurora/IPL1-related kinase 1) (ARK-1) (Aurora-related kinase 1) (hARK1) (Breast tumor-amplified kinase) (Serine/threonine-protein kinase 15) (Serine/threonine-protein kinase 6) (Serine/threonine-protein kinase aurora-A)	Homo sapiens (Human)	CC1=C(C(=CC=C1)Cl)NC(=O)C2=CN=C(S2)NC3=NC(=NC(=C3)N4CCN(CC4)CCO)C	CHEMBL1421	100	IC50	=	2633	8	Eur. J. Med. Chem., (2011) 46:9:4311
Dasatinib	DAP000004	3emg-685	0.81	0.26	-7	P43405	Tyrosine-protein kinase SYK (EC 2.7.10.2) (Spleen tyrosine kinase) (p72-Syk)	Homo sapiens (Human)	CC1=C(C(=CC=C1)Cl)NC(=O)C2=CN=C(S2)NC3=NC(=NC(=C3)N4CCN(CC4)CCO)C	CHEMBL1421	100	Kd	=	2900	9	Nat. Biotechnol., (2011) 29:11:1046
Erlotinib	DAP001010	2w1f-L0F	0.9	0.22	-7	O14965	Aurora kinase A (EC 2.7.11.1) (Aurora 2) (Aurora/IPL1-related kinase 1) (ARK-1) (Aurora-related kinase 1) (hARK1) (Breast tumor-amplified kinase) (Serine/threonine-protein kinase 15) (Serine/threonine-protein kinase 6) (Serine/threonine-protein kinase aurora-A)	Homo sapiens (Human)	COCCOC1=C(C=C2C(=C1)C(=NC=N2)NC3=CC=CC(=C3)C#C)OCCOC	CHEMBL553	100	Kd	=	2200	9	Nat. Biotechnol., (2011) 29:11:1046
Erlotinib	DAP001010	1oec-AA2	0.9	0.25	-7.3	P21802	Fibroblast growth factor receptor 2 (FGFR-2) (EC 2.7.10.1) (K-sam) (KGFR) (Keratinocyte growth factor receptor) (CD antigen CD332)	Homo sapiens (Human)	COCCOC1=C(C=C2C(=C1)C(=NC=N2)NC3=CC=CC(=C3)C#C)OCCOC	CHEMBL553	100	Kd	=	1900	9	Nat. Biotechnol., (2005) 23:3:329
Ethinyl estradiol	DAP001018	1qkt-EST	0.91	0.68	-9.2	P03372	Estrogen receptor (ER) (ER-alpha) (Estradiol receptor) (Nuclear receptor subfamily 3 group A member 1)	Homo sapiens (Human)	C[C@]12CC[C@H]3[C@H]([C@@H]1CC[C@]2(C#C)O)CCC4=C3C=CC(=C4)O	CHEMBL691	100	IC50	=	0.448	9	Unspecified
Ethinyl estradiol	DAP001018	1l2j-ETC	0.84	0.22	-8.8	Q92731	Estrogen receptor beta (ER-beta) (Nuclear receptor subfamily 3 group A member 2)	Homo sapiens (Human)	C[C@]12CC[C@H]3[C@H]([C@@H]1CC[C@]2(C#C)O)CCC4=C3C=CC(=C4)O	CHEMBL691	100	IC50	=	8.1	7	J. Med. Chem., (2006) 49:11:3056
Ethinyl estradiol	DAP001018	3eml-ZMA	0.83	0.09	-9.4	P29274	Adenosine receptor A2a	Homo sapiens (Human)	C[C@]12CC[C@H]3[C@H]([C@@H]1CC[C@]2(C#C)O)CCC4=C3C=CC(=C4)O	CHEMBL691	100	Ki	=	11751	9	Unspecified
Flutamide	DAP000301	2ax6-HFT	0.96	0.74	-8.5	P10275	Androgen receptor (Dihydrotestosterone receptor) (Nuclear receptor subfamily 3 group C member 4)	Homo sapiens (Human)	CC(C)C(=O)NC1=CC(=C(C=C1)[N+](=O)[O-])C(F)(F)F	CHEMBL806	100	Ki	=	1300	9	Bioorg. Med. Chem. Lett., (2003) 13:16:2655
Gefitinib	DAP000657	2h8h-H8H	0.85	0.38	-8.7	P12931	Proto-oncogene tyrosine-protein kinase Src (EC 2.7.10.2) (Proto-oncogene c-Src) (pp60c-src) (p60-Src)	Homo sapiens (Human)	COC1=C(C=C2C(=C1)N=CN=C2NC3=CC(=C(C=C3)F)Cl)OCCCN4CCOCC4	CHEMBL939	100	IC50	=	1100	8	Nat. Chem. Biol., (2008) 4:11:691
Gefitinib	DAP000657	2vwu-7X1	0.82	0.52	-8	P54760	Ephrin type-B receptor 4 (EC 2.7.10.1) (Hepatoma transmembrane kinase) (Tyrosine-protein kinase TYRO11)	Homo sapiens (Human)	COC1=C(C=C2C(=C1)N=CN=C2NC3=CC(=C(C=C3)F)Cl)OCCCN4CCOCC4	CHEMBL939	100	IC50	=	1000	8	Nat. Chem. Biol., (2008) 4:11:691
Gefitinib	DAP000657	1qcf-PP1	0.78	0.14	-8.6	P08631	Tyrosine-protein kinase HCK (EC 2.7.10.2) (Hematopoietic cell kinase) (Hemopoietic cell kinase) (p59-HCK/p60-HCK) (p59Hck) (p61Hck)	Homo sapiens (Human)	COC1=C(C=C2C(=C1)N=CN=C2NC3=CC(=C(C=C3)F)Cl)OCCCN4CCOCC4	CHEMBL939	100	IC50	=	110	8	Nat. Chem. Biol., (2008) 4:11:691
Gefitinib	DAP000657	3kvx-FMY	0.75	0.29	-8.2	P53779	Mitogen-activated protein kinase 10 (MAP kinase 10) (MAPK 10) (EC 2.7.11.24) (MAP kinase p49 3F12) (Stress-activated protein kinase 1b) (SAPK1b) (Stress-activated protein kinase JNK3) (c-Jun N-terminal kinase 3)	Homo sapiens (Human)	COC1=C(C=C2C(=C1)N=CN=C2NC3=CC(=C(C=C3)F)Cl)OCCCN4CCOCC4	CHEMBL939	100	Kd	=	2300	9	Nat. Biotechnol., (2005) 23:3:329
Imatinib	DAP000179	1xbb-STI	0.99	1	-8.3	P43405	Tyrosine-protein kinase SYK (EC 2.7.10.2) (Spleen tyrosine kinase) (p72-Syk)	Homo sapiens (Human)	CC1=C(C=C(C=C1)NC(=O)C2=CC=C(C=C2)CN3CCN(CC3)C)NC4=NC=CC(=N4)C5=CN=CC=C5	CHEMBL941	100	IC50	=	5000	8	Bioorg. Med. Chem. Lett., (2009) 19:7:1944
Imatinib	DAP000179	3gvu-STI	0.95	1	-12	P42684	Abelson tyrosine-protein kinase 2 (EC 2.7.10.2) (Abelson murine leukemia viral oncogene homolog 2) (Abelson-related gene protein) (Tyrosine-protein kinase ARG)	Homo sapiens (Human)	CC1=C(C=C(C=C1)NC(=O)C2=CC=C(C=C2)CN3CCN(CC3)C)NC4=NC=CC(=N4)C5=CN=CC=C5	CHEMBL941	100	Kd	=	6	9	J. Med. Chem., (2011) 54:7:2359
Imatinib	DAP000179	2hyy-STI	0.92	1	-11.7	P00519	Tyrosine-protein kinase ABL1 (EC 2.7.10.2) (Abelson murine leukemia viral oncogene homolog 1) (Abelson tyrosine-protein kinase 1) (Proto-oncogene c-Abl) (p150)	Homo sapiens (Human)	CC1=C(C=C(C=C1)NC(=O)C2=CC=C(C=C2)CN3CCN(CC3)C)NC4=NC=CC(=N4)C5=CN=CC=C5	CHEMBL941	100	Kd	=	1.1	9	Nat. Biotechnol., (2011) 29:11:1046
Imatinib	DAP000179	2o0u-C0M	0.92	0.26	-9.8	P53779	Mitogen-activated protein kinase 10 (MAP kinase 10) (MAPK 10) (EC 2.7.11.24) (MAP kinase p49 3F12) (Stress-activated protein kinase 1b) (SAPK1b) (Stress-activated protein kinase JNK3) (c-Jun N-terminal kinase 3)	Homo sapiens (Human)	CC1=C(C=C(C=C1)NC(=O)C2=CC=C(C=C2)CN3CCN(CC3)C)NC4=NC=CC(=N4)C5=CN=CC=C5	CHEMBL941	100	Kd	=	3100	9	Nat. Biotechnol., (2008) 26:1:127
Imatinib	DAP000179	3roc-29A	0.91	0.25	-8.9	Q16539	Mitogen-activated protein kinase 14 (MAP kinase 14) (MAPK 14) (EC 2.7.11.24) (Cytokine suppressive anti-inflammatory drug-binding protein) (CSAID-binding protein) (CSBP) (MAP kinase MXI2) (MAX-interacting protein 2) (Mitogen-activated protein kinase p38 alpha) (MAP kinase p38 alpha) (Stress-activated protein kinase 2a) (SAPK2a)	Homo sapiens (Human)	CC1=C(C=C(C=C1)NC(=O)C2=CC=C(C=C2)CN3CCN(CC3)C)NC4=NC=CC(=N4)C5=CN=CC=C5	CHEMBL941	100	IC50	=	13700	8	Bioorg. Med. Chem. Lett., (2008) 18:14:4137
Nelarabine	DAP000985	1rfg-GMP	0.98	0.75	-7.1	P00491	Purine nucleoside phosphorylase (PNP) (EC 2.4.2.1) (Inosine phosphorylase) (Inosine-guanosine phosphorylase)	Homo sapiens (Human)	COC1=NC(=NC2=C1N=CN2[C@H]3[C@H]([C@@H]([C@H](O3)CO)O)O)N	CHEMBL2021376	97.1534	IC50	=	1330	8	J. Med. Chem., (1986) 29:9:1804
Nilotinib	DCL000360	2ok1-33A	0.93	0.32	-8.6	P53779	Mitogen-activated protein kinase 10 (MAP kinase 10) (MAPK 10) (EC 2.7.11.24) (MAP kinase p49 3F12) (Stress-activated protein kinase 1b) (SAPK1b) (Stress-activated protein kinase JNK3) (c-Jun N-terminal kinase 3)	Homo sapiens (Human)	CC1=C(C=C(C=C1)C(=O)NC2=CC(=CC(=C2)N3C=C(N=C3)C)C(F)(F)F)NC4=NC=CC(=N4)C5=CN=CC=C5	CHEMBL255863	100	Kd	=	2000	9	Nat. Biotechnol., (2011) 29:11:1046
Nilotinib	DCL000360	3gvu-STI	0.89	0.35	-13.4	P42684	Abelson tyrosine-protein kinase 2 (EC 2.7.10.2) (Abelson murine leukemia viral oncogene homolog 2) (Abelson-related gene protein) (Tyrosine-protein kinase ARG)	Homo sapiens (Human)	CC1=C(C=C(C=C1)C(=O)NC2=CC(=CC(=C2)N3C=C(N=C3)C)C(F)(F)F)NC4=NC=CC(=N4)C5=CN=CC=C5	CHEMBL255863	100	Kd	=	26	9	Nat. Biotechnol., (2011) 29:11:1046
Pazopanib	DCL000351	3fqe-P5C	0.86	0.18	-9	P43405	Tyrosine-protein kinase SYK (EC 2.7.10.2) (Spleen tyrosine kinase) (p72-Syk)	Homo sapiens (Human)	CC1=C(C=C(C=C1)NC2=NC=CC(=N2)N(C)C3=CC4=NN(C(=C4C=C3)C)C)S(=O)(=O)N	CHEMBL477772	100	Kd	=	4700	9	Nat. Biotechnol., (2011) 29:11:1046
Pazopanib	DCL000351	3l8p-0CE	0.86	0.18	-10.1	Q02763	Angiopoietin-1 receptor (EC 2.7.10.1) (Endothelial tyrosine kinase) (Tunica interna endothelial cell kinase) (Tyrosine kinase with Ig and EGF homology domains-2) (Tyrosine-protein kinase receptor TEK) (Tyrosine-protein kinase receptor TIE-2) (hTIE2) (p140 TEK) (CD antigen CD202b)	Homo sapiens (Human)	CC1=C(C=C(C=C1)NC2=NC=CC(=N2)N(C)C3=CC4=NN(C(=C4C=C3)C)C)S(=O)(=O)N	CHEMBL477772	100	Kd	=	3300	9	Nat. Biotechnol., (2011) 29:11:1046
Pazopanib	DCL000351	3dtc-VIN	0.82	0.21	-9.8	P80192	Mitogen-activated protein kinase kinase kinase 9 (EC 2.7.11.25) (Mixed lineage kinase 1)	Homo sapiens (Human)	CC1=C(C=C(C=C1)NC2=NC=CC(=N2)N(C)C3=CC4=NN(C(=C4C=C3)C)C)S(=O)(=O)N	CHEMBL477772	100	Kd	=	290	9	Nat. Biotechnol., (2008) 26:1:127
Pazopanib	DCL000351	2w1f-L0F	0.81	0.26	-8.9	O14965	Aurora kinase A (EC 2.7.11.1) (Aurora 2) (Aurora/IPL1-related kinase 1) (ARK-1) (Aurora-related kinase 1) (hARK1) (Breast tumor-amplified kinase) (Serine/threonine-protein kinase 15) (Serine/threonine-protein kinase 6) (Serine/threonine-protein kinase aurora-A)	Homo sapiens (Human)	CC1=C(C=C(C=C1)NC2=NC=CC(=N2)N(C)C3=CC4=NN(C(=C4C=C3)C)C)S(=O)(=O)N	CHEMBL477772	100	Kd	=	7100	9	Nat. Biotechnol., (2011) 29:11:1046
Sorafenib	DAP000006	1oec-AA2	0.93	0.17	-7.6	P21802	Fibroblast growth factor receptor 2 (FGFR-2) (EC 2.7.10.1) (K-sam) (KGFR) (Keratinocyte growth factor receptor) (CD antigen CD332)	Homo sapiens (Human)	CNC(=O)C1=NC=CC(=C1)OC2=CC=C(C=C2)NC(=O)NC3=CC(=C(C=C3)Cl)C(F)(F)F	CHEMBL1336	100	Kd	=	2700	9	Nat. Biotechnol., (2011) 29:11:1046
Sorafenib	DAP000006	1y57-MPZ	0.92	0.26	-7.3	P12931	Proto-oncogene tyrosine-protein kinase Src (EC 2.7.10.2) (Proto-oncogene c-Src) (pp60c-src) (p60-Src)	Homo sapiens (Human)	CNC(=O)C1=NC=CC(=C1)OC2=CC=C(C=C2)NC(=O)NC3=CC(=C(C=C3)Cl)C(F)(F)F	CHEMBL1336	100	IC50	=	390	8	Nat. Chem. Biol., (2008) 4:11:691
Sorafenib	DAP000006	1uwh-BAX	0.92	1	-12.4	P15056	Serine/threonine-protein kinase B-raf (EC 2.7.11.1) (Proto-oncogene B-Raf) (p94) (v-Raf murine sarcoma viral oncogene homolog B1)	Homo sapiens (Human)	CNC(=O)C1=NC=CC(=C1)OC2=CC=C(C=C2)NC(=O)NC3=CC(=C(C=C3)Cl)C(F)(F)F	CHEMBL1336	100	IC50	=	15	8	Bioorg. Med. Chem. Lett., (2008) 18:9:2825
Sorafenib	DAP000006	3hmi-DKI	0.91	0.21	-9.9	P42684	Abelson tyrosine-protein kinase 2 (EC 2.7.10.2) (Abelson murine leukemia viral oncogene homolog 2) (Abelson-related gene protein) (Tyrosine-protein kinase ARG)	Homo sapiens (Human)	CNC(=O)C1=NC=CC(=C1)OC2=CC=C(C=C2)NC(=O)NC3=CC(=C(C=C3)Cl)C(F)(F)F	CHEMBL1336	100	Kd	=	1300	9	Nat. Biotechnol., (2005) 23:3:329
Sorafenib	DAP000006	2oh4-GIG	0.91	0.49	-10.8	P35968	Vascular endothelial growth factor receptor 2 (VEGFR-2) (EC 2.7.10.1) (Fetal liver kinase 1) (FLK-1) (Kinase insert domain receptor) (KDR) (Protein-tyrosine kinase receptor flk-1) (CD antigen CD309)	Homo sapiens (Human)	CNC(=O)C1=NC=CC(=C1)OC2=CC=C(C=C2)NC(=O)NC3=CC(=C(C=C3)Cl)C(F)(F)F	CHEMBL1336	100	IC50	=	0.16	9	Bioorg. Med. Chem., (2011) 19:18:5342
Sorafenib	DAP000006	2w1f-L0F	0.87	0.24	-7.8	O14965	Aurora kinase A (EC 2.7.11.1) (Aurora 2) (Aurora/IPL1-related kinase 1) (ARK-1) (Aurora-related kinase 1) (hARK1) (Breast tumor-amplified kinase) (Serine/threonine-protein kinase 15) (Serine/threonine-protein kinase 6) (Serine/threonine-protein kinase aurora-A)	Homo sapiens (Human)	CNC(=O)C1=NC=CC(=C1)OC2=CC=C(C=C2)NC(=O)NC3=CC(=C(C=C3)Cl)C(F)(F)F	CHEMBL1336	100	IC50	=	3800	8	Bioorg. Med. Chem. Lett., (2012) 22:14:4654
Sorafenib	DAP000006	3l8p-0CE	0.82	0.13	-10.7	Q02763	Angiopoietin-1 receptor (EC 2.7.10.1) (Endothelial tyrosine kinase) (Tunica interna endothelial cell kinase) (Tyrosine kinase with Ig and EGF homology domains-2) (Tyrosine-protein kinase receptor TEK) (Tyrosine-protein kinase receptor TIE-2) (hTIE2) (p140 TEK) (CD antigen CD202b)	Homo sapiens (Human)	CNC(=O)C1=NC=CC(=C1)OC2=CC=C(C=C2)NC(=O)NC3=CC(=C(C=C3)Cl)C(F)(F)F	CHEMBL1336	100	Kd	=	2100	9	Nat. Biotechnol., (2008) 26:1:127
Sunitinib	DCL000646	3lxp-IZA	0.79	0.24	-8.5	P29597	Non-receptor tyrosine-protein kinase TYK2 (EC 2.7.10.2)	Homo sapiens (Human)	CCN(CC)CCNC(=O)C1=C(NC(=C1C)/C=C\2/C3=C(C=CC(=C3)F)NC2=O)C	CHEMBL535	100	Kd	=	360	9	Nat. Biotechnol., (2011) 29:11:1046
Sunitinib	DCL000646	2jav-5Z5	0.77	0.48	-8.1	P51955	Serine/threonine-protein kinase Nek2 (EC 2.7.11.1) (HSPK 21) (Never in mitosis A-related kinase 2) (NimA-related protein kinase 2) (NimA-like protein kinase 1)	Homo sapiens (Human)	CCN(CC)CCNC(=O)C1=C(NC(=C1C)/C=C\2/C3=C(C=CC(=C3)F)NC2=O)C	CHEMBL535	100	Kd	=	500	8	Proc. Natl. Acad. Sci. U.S.A., (2007) 104:50:19936
Sunitinib	DCL000646	2np8-CC3	0.75	0.18	-7.1	O14965	Aurora kinase A (EC 2.7.11.1) (Aurora 2) (Aurora/IPL1-related kinase 1) (ARK-1) (Aurora-related kinase 1) (hARK1) (Breast tumor-amplified kinase) (Serine/threonine-protein kinase 15) (Serine/threonine-protein kinase 6) (Serine/threonine-protein kinase aurora-A)	Homo sapiens (Human)	CCN(CC)CCNC(=O)C1=C(NC(=C1C)/C=C\2/C3=C(C=CC(=C3)F)NC2=O)C	CHEMBL535	100	IC50	=	1837	8	Eur. J. Med. Chem., (2011) 46:9:4311
