# Supplementary material for: An improved approach for predicting drug–target interaction: proteochemometrics to molecular docking
Source: Royal Society of Chemistry journal article supplement (doi:10.1039/c5mb00650c), 2016-01-19
Supplement: c5mb00650c4.csv [file c5mb00650c4.csv]

smiles	pdb-HET	Uniprot ID
Brc1c2nn[nH]c2c(Br)c(Br)c1Br	1p5e-TBS	P24941
Brc1cccc(-c2cc(NCc3ccncc3)[n+]3[nH]ccc3n2)c1	2c68-CT6	P24941
Brc1cccc(-c2cc(NCc3ccncc3)[n+]3[nH]cnc3n2)c1	2c69-CT8	P24941
Brc1cnc2c(NCc3cncnc3)cc(-c3ccccc3)cn12	2r3l-SCW	P24941
Brc1cnn2c1cc(-c1ccccc1)cc2NCc1cncnc1	2r3k-SCQ	P24941
Brc1cnn2c1nc(-c1ccccc1)cc2NCc1cccnc1	2r3j-SCJ	P24941
Brc1cnn2c1nc(-c1ccccc1)cc2NCc1ccncc1	2r3r-6SC	P24941
c1cc(-c2c[nH+]c3cnc(-c4cn[nH]c4)cn23)n[nH]1	2xez-XEZ	O14757
c1ccc(CNc2c3ccccc3nc3c2CCCC3)cc1	1dx4-760	P07140
C1CCN(C2CC[NH2+]CC2)CC1	1k4y-4PN	P12337
c1cncc(C2=NCCCC2)c1	2wnl-AN4_AN5	Q8WSF8
c1c[nH]c(-c2cc3ccccc3o2)n1	2xfn-XCG	P27338
C1N2C[NH+]3CN1CP(C2)C3	3mnn-PTW	P84233
c1nc2c(ncnc2N2CCOCC2)[nH]1	2wmu-ZYU	O14757
c1nc2c(nc(Nc3ccc(N4CCOCC4)cc3)nc2NC2CCCCC2)[nH]1	2vgo-AD5	Q6DE08
c1nn2cc(-c3ccc(OCC[NH+]4CCCCC4)cc3)cnc2c1-c1ccncc1	3aqv-TAK	P54646
c1n[nH]c2ncc(-c3ccc4nccc(-c5ccncc5)c4c3)cc12	3l54-LXX	P48736
c1n[nH]cc1-c1cn2c(-c3ccccc3)c[nH+]c2cn1	2xf0-4UB	O14757
c1n[nH]cc1-c1cn2c(-c3c[nH]c4ccccc43)c[nH+]c2cn1	2xey-YVQ	O14757
CC12CCC3c4ccc(O)cc4CCC3C1CCC2O	1e6w-EST	O70351
CC12CCC3c4ccc(O)cc4CC=C3C1CCC2=O	1equ-EQI	P14061
CC12CCC3c4ccc(O)cc4CCC3C1CCC2O	1fds-EST	P14061
CC12CCC3c4ccc(O)cc4CCC3C1CCC2O	1qkt-EST	P03372
CC12CCC3c4ccc(O)cc4CCC3C1CCC2O	2j7x-EST	Q62986
CC12CCc3c4ccc(O)cc4ccc3C1CCC2=O	3m8c-EQU	P00947
CC12CCC3c4ccc(O)cc4CCC3C1CC(Cc1cccc(C(N)=O)c1)C2O	3hb5-E2B	P14061
CC12CCC3c4ccc(O)cc4CCC3C1CC(CCCCCCCCC(=O)OCC1OC(n3cnc4c3ncnc4N)C(O)C1O)C2O	1i5r-HYC	P14061
CC12CCC3c4ccc(O)cc4CCC3C1CC(O)C2O	2j7y-E3O	Q62986
CC12CCC3c4ccc(OS(N)(=O)=O)cc4CCC3C1CC(=O)N(Cc1cccnc1)C2=O	3c7p-POF	P00918
CC12CCC3C(CCC4=CC(=O)CCC43C)C1CCC2O	1afs-TES	P23457
CC12CCC3C(CC=C4CC(O)CCC43C)C1CCC2=O	1coy-AND	P22637
CC12CCC3C(CCC4CC(=O)CCC43C)C1CCC2O	1dht-DHT	P14061
CC12CCC3C(CCC4CC(=O)CCC43C)C1CCC2O	1i38-DHT	P15207
CC12CCC3C(CCC4=CC(=O)CCC43C)C1CCC2O	1j96-TES	P52895
CC12CCC3C(CC=C4CC(O)CCC43C)C1CCC2=O	1j99-AND	Q06520
CC12CCC3C(CCC4=CC(=O)CCC43C)C1CCC2O	1jtv-TES	P14061
CC12CCC3C(CCC4CC(O)CCC43C)C1CCC2=O	1nfq-AE2	P69167
CC12CCC3C(CCC4=CC(=O)CCC43C)C1CCC2O	1q13-TES	P80508
CC12CCC3C(CCC4=CC(=O)CCC43C)C1CCC2=O	1qyx-ASD	P14061
CC12CCC3C(CCC4CC(=O)CCC43C)C1CCC2O	1t7r-DHT	O97775
CC12CCC3C(CCC4=CC(=O)CCC43C)C1CCC2=O	1xf0-ASD	P42330
CC12CCC3C(CCC4=CC(=O)CCC43C)C1CCC2O	2ipf-FFA	Q91WR5
CC12CCC3C(CCC4=CC(=O)CCC43C)C1CCC2O	2ipj-FFA	P52895
CC12CCC3C(CCC4=CC(=O)CCC43C)C1CCC2=O	2vct-ASD	P09210
CC12CCC3C(CCC4=CC(=O)CCC43C)C1CCC2O	3bur-TES	P51857
CC12CCC3C(CCC4=CC(=O)CCC43C)C1CCC2=O	3cas-ASD	P51857
CC12CCC3C(CC=C4CC(O)CCC43C)C1CCC2=O	3dhe-AND	P14061
CC12CCC3C(CCC4CC(=O)CCC43C)C1CCC2O	3dop-BDT	P51857
CC12CCC3C(CCC4CC(=O)CCC43C)C1CCC2O	3klm-DHT	P14061
CC12CCC3C(CCC4CC(O)CCC43C)C1CCC2O	3km0-AOM	P14061
CC12CCC3C(CCC4CC(=O)CCC43C)C1CCC2O	3l3x-DHT	P10275
CC12CC(O)C3C(CCC4=CC(=O)CCC43C)C1CCC2C(=O)CO	1y5r-C0R	P50172
CC12CC(O)C3(F)C(CCC4=CC(=O)CCC43C)C1CCC2(O)C(=O)CO	1gs4-ZK5	P10275
Cc1c2cccc(O)c2c(O)c2c1CC1C([NH+](C)C)C(=O)C(=C(N)[O-])C(=O)C1(O)C2=O	2vkv-TDC	P04483
Cc1c2cccc(O)c2c(O)c2c1CC1C([NH+](C)C)C(=O)C(=C(N)[O-])C(=O)C1(O)C2=O	2vpr-TDC	Q799E2
CC1c2cccc(O)c2C([O-])=C2C(=O)C3(O)C(=O)C(=C(N)[O-])C(=O)C([NH+](C)C)C3C(O)C21	2o7o-DXT	P0ACT4
CC1(c2nc3cccc(C(N)=O)c3[nH]2)CCC[NH2+]1	3kjd-78P	Q9UGN5
CC1c2nc(C(F)(F)F)nn2CCN1C(=O)CC([NH3+])Cc1cc(F)c(F)cc1F	2qoe-448	P27487
Cc1c2[nH]c3ccc(O)cc3c2c(C)c2c1CC=NC2=O	3owj-1EL	Q5U5J2
Cc1c(Br)c(=O)oc2c(Br)c(O)ccc12	2qc6-G12	P28523
Cc1cc2c3c(c1)C(CC(C)C)NC(=O)C(CC(C)C)NP([O-])(O)CC(CC2)O3	1pe5-BR3_LEU_LEN	P00800
Cc1cc2c(cc1C)N(CC(O)C(O)C(O)COP([O-])(O)O)C1NC(=O)NC(=O)C1=N2	1bkj-FMN	Q56691
Cc1cc2c(cc1C)N(CC(O)C(O)C(O)COP([O-])(O)O)C1NC(=O)NC(=O)C1=N2	1mvl-FMN	Q9SWE5
Cc1cc2c(cc1C)N(CC(O)C(O)C(O)COP([O-])(O)O)C1NC(=O)NC(=O)C1=N2	1nox-FMN	Q60049
Cc1cc2c(cc1C)N(CC(O)C(O)C(O)COP([O-])(O)O)C1NC(=O)NC(=O)C1=N2	1p0n-FMN	P50740
Cc1cc2c(cc1C)N(CC(O)C(O)C(O)COP([O-])(O)O)C1NC(=O)NC(=O)C1=N2	1t0i-FMN	Q07923
Cc1cc2c(cc1C)N(CC(O)C(O)C(O)COP([O-])(O)O)C1NC(=O)NC(=O)C1=N2	1t5b-FMN	P63462
Cc1cc2c(cc1C)N(CC(O)C(O)C(O)COP([O-])(O)O)C1NC(=O)NC(=O)C1=N2	1vhn-FMN	Q9WXV1
Cc1cc2c(cc1C)N(CC(O)C(O)C(O)COP([O-])(O)O)C1NC(=O)NC(=O)C1=N2	2byc-FMN	Q3IYE4
Cc1cc2c(cc1C)N(CC(O)C(O)C(O)COP([O-])(O)O)C1NC(=O)NC(=O)C1=N2	2h0u-FMN	Q7BGI8
Cc1cc2c(cc1C)N(CC(O)C(O)C(O)COP([O-])(O)O)C1NC(=O)NC(=O)C1=N2	2o12-FMN	P63611
Cc1cc2c(cc1C)N(CC(O)C(O)C(O)COP([O-])(O)O)C1NC(=O)NC(=O)C1=N2	2ptf-FMN	O26951
Cc1cc2c(cc1C)N(CC(O)C(O)C(O)COP([O-])(O)O)C1NC(=O)NC(=O)C1=N2	2wqf-FMN	Q9CED0
Cc1cc2c(cc1C)N(CC(O)C(O)C(O)COP(=O)(O)O)C1NC(=O)NC(=O)C1=N2	3bnk-FMN	Q8TTU7
Cc1cc2c(cc1C)N(CC(O)C(O)C(O)COP(=O)(O)O)C1NC(=O)NC(=O)C1=N2	3bw2-FMN	Q9FDD4
Cc1cc2c(cc1C)N(CC(O)C(O)C(O)COP(=O)(O)O)C1NC(=O)NC(=O)C1=N2	3dh7-FMN	Q53W52
Cc1cc2c(cc1C)N(CC(O)C(O)C(O)COP(=O)(O)O)C1NC(=O)NC(=O)C1=N2	3e39-FMN	Q314Q8
Cc1cc2c(cc1C)N(CC(O)C(O)C(O)COP([O-])(O)O)C1NC(=O)NC(=O)C1=N2	3koq-FMN	Q180K0
Cc1cc2c(cc1C)N(CC(O)C(O)C(O)COP([O-])(O)O)C1NC(=O)NC(=O)C1=N2	3kwk-FMN	Q8ABC9
Cc1cc2c(cc1C)N(CC(O)C(O)C(O)COP([O-])(O)OP([O-])(O)OCC1OC(n3cnc4c3ncnc4N)C(O)C1O)C1NC(=O)NC(=O)C1=N2	1ddg-FAD	P38038
Cc1cc2c(cc1C)N(CC(O)C(O)C(O)COP([O-])(O)OP([O-])(O)OCC1OC(n3cnc4c3ncnc4N)C(O)C1O)C1NC(=O)NC(=O)C1=N2	1gxf-FAD	P28593
Cc1cc2c(cc1C)N(CC(O)C(O)C(O)COP([O-])(O)OP([O-])(O)OCC1OC(n3cnc4c3ncnc4N)C(O)C1O)C1NC(=O)NC(=O)C1=N2	1jr8-FAD	Q12284
Cc1cc2c(cc1C)N(CC(O)C(O)C(O)COP([O-])(O)OP([O-])(O)OCC1OC(n3cnc4c3ncnc4N)C(O)C1O)C1NC(=O)NC(=O)C1=N2	1nhp-FAD	P37062
Cc1cc2c(cc1C)N(CC(O)C(O)C(O)COP([O-])(O)OP([O-])(O)OCC1OC(n3cnc4c3ncnc4N)C(O)C1O)C1NC(=O)NC(=O)C1=N2	1xhc-FAD	Q8U1K9
Cc1cc2c(cc1C)N(CC(O)C(O)C(O)COP(=O)(O)OP(=O)(O)OCC1OC(n3cnc4c3ncnc4N)C(O)C1O)C1NC(=O)NC(=O)C1=N2	1ybh-FAD	P17597
Cc1cc2c(cc1C)N(CC(O)C(O)C(O)COP([O-])(O)OP([O-])(O)OCC1OC(n3cnc4c3ncnc4N)C(O)C1O)C1NC(=O)NC(=O)C1=N2	2d29-FAD	Q5SGZ2
Cc1cc2c(cc1C)N(CC(O)C(O)C(O)COP([O-])(O)OP([O-])(O)OCC1OC(n3cnc4c3ncnc4N)C(O)C1O)C1NC(=O)NC(=O)C1=N2	2gqf-FAD	P44941
Cc1cc2c(cc1C)N(CC(O)C(O)C(O)COP([O-])(O)OP([O-])(O)OCC1OC(n3cnc4c3ncnc4N)C(O)C1O)C1NC(=O)NC(=O)C1=N2	2hti-FAD	Q9KFA8
Cc1cc2c(cc1C)N(CC(O)C(O)C(O)COP(=O)(O)OP(=O)(O)OCC1OC(n3cnc4c3ncnc4N)C(O)C1O)C1NC(=O)NC(=O)C1=N2	2jkc-FAD	P95480
Cc1cc2c(cc1C)N(CC(O)C(O)C(O)COP([O-])(O)OP([O-])(O)OCC1OC(n3cnc4c3ncnc4N)C(O)C1O)C1NC(=O)NC(=O)C1=N2	2q0l-FAD	P56431
Cc1cc2c(cc1C)N(CC(O)C(O)C(O)COP([O-])(O)OP([O-])(O)OCC1OC(n3cnc4c3ncnc4N)C(O)C1O)C1NC(=O)NC(=O)C1=N2	2qae-FAD	P90597
Cc1cc2c(cc1C)N(CC(O)C(O)C(O)COP([O-])(O)OP([O-])(O)OCC1OC(n3cnc4c3ncnc4N)C(O)C1O)C1NC(=O)NC(=O)C1=N2	2r0c-FAD	Q8KI25
Cc1cc2c(cc1C)N(CC(O)C(O)C(O)COP([O-])(O)OP([O-])(O)OCC1OC(n3cnc4c3ncnc4N)C(O)C1O)C1NC(=O)NC(=O)C1=N2	2rc5-FAD	Q8EY89
Cc1cc2c(cc1C)N(CC(O)C(O)C(O)COP([O-])(O)OP([O-])(O)OCC1OC(n3cnc4c3ncnc4N)C(O)C1O)C1NC(=O)NC(=O)C1=N2	2rgj-FAD	Q9HWG9
Cc1cc2c(cc1C)N(CC(O)C(O)C(O)COP([O-])(O)OP([O-])(O)OCC1OC(n3cnc4c3ncnc4N)C(O)C1O)C1NC(=O)NC(=O)C1=N2	2v3a-FAD	Q9HTK9
Cc1cc2c(cc1C)N(CC(O)C(O)C(O)COP(=O)(O)OP(=O)(O)OCC1OC(n3cnc4c3ncnc4N)C(O)C1O)C1NC(=O)NC(=O)C1=N2	2wbi-FAD	Q709F0
Cc1cc2c(cc1C)N(CC(O)C(O)C(O)COP([O-])(O)OP([O-])(O)OCC1OC(n3cnc4c3ncnc4N)C(O)C1O)C1NC(=O)NC(=O)C1=N2	2wsi-FAD	P38913
Cc1cc2c(cc1C)N(CC(O)C(O)C(O)COP([O-])(O)OP([O-])(O)OCC1OC(n3cnc4c3ncnc4N)C(O)C1O)C1NC(=O)NC(=O)C1=N2	2x3n-FAD	Q9HWJ1
Cc1cc2c(cc1C)N(CC(O)C(O)C(O)COP([O-])(O)OP([O-])(O)OCC1OC(n3cnc4c3ncnc4N)C(O)C1O)C1NC(=O)NC(=O)C1=N2	3awi-FAD	P77182
Cc1cc2c(cc1C)N(CC(O)C(O)C(O)COP(=O)(O)OP(=O)(O)OCC1OC(n3cnc4c3ncnc4N)C(O)C1O)C1NC(=O)NC(=O)C1=N2	3f8d-FAD	Q97W27
Cc1cc2c(cc1C)N(CC(O)C(O)C(O)COP([O-])(O)OP([O-])(O)OCC1OC(n3cnc4c3ncnc4N)C(O)C1O)C1NC(=O)NC(=O)C1=N2	3i99-FAD	C3LQS2
Cc1cc2c(cc1C)N(CC(O)C(O)C(O)COP([O-])(O)OP([O-])(O)OCC1OC(n3cnc4c3ncnc4N)C(O)C1O)C1NC(=O)NC(=O)C1=N2	3klj-FAD	Q9AL95
Cc1cc2c(cc1C)N(CC(O)C(O)C(O)COP([O-])(O)OP([O-])(O)OCC1OC(n3cnc4c3ncnc4N)C(O)C1O)C1NC(=O)NC(=O)C1=N2	3lad-FAD	P18925
Cc1cc2c(cc1C)N(CC(O)C(O)C(O)COP([O-])(O)OP([O-])(O)OCC1OC(n3cnc4c3ncnc4N)C(O)C1O)C1NC(=O)NC(=O)C1=N2	3mkh-FAD	B2AM55
Cc1cc2c(cc1C)N(CC(O)C(O)C(O)COP([O-])(O)OP([O-])(O)OCC1OC(n3cnc4c3ncnc4N)C(O)C1O)C1NC(=O)NC(=O)C1=N2	3mpi-FAD	C3UVB0
Cc1cc2c(cc1C)N(CC(O)C(O)C(O)COP([O-])(O)OP([O-])(O)OCC1OC(n3cnc4c3ncnc4N)C(O)C1O)C1NC(=O)NC(=O)C1=N2	3nix-FAD	Q11R94
Cc1cc2c(cc1C)N(CC(O)C(O)C(O)COP([O-])(O)OP([O-])(O)OCC1OC(n3cnc4c3ncnc4N)C(O)C1O)C1NC(=O)NC(=O)C1=N2	3oc4-FAD	Q833L5
Cc1cc2c(cc1C)N(CC(O)C(O)C(O)COP([O-])(O)OP([O-])(O)OCC1OC(n3cnc4c3ncnc4N)C(O)C1O)C1NC(=O)NC(=O)C1=N2	3r9u-FAD	Q0PBZ1
CC1Cc2ccccc2N1NC(=O)c1ccc(Cl)c(S(N)(=O)=O)c1	3bl1-BL1	P00918
Cc1cc2cc(O)ccc2c(Oc2ccc(O)cc2)c1-c1cccc(O)c1	3dt3-369	P03372
Cc1cc2c(=O)c(O)c(-c3ccc(O)c(O)c3)oc2c(N2CCCS2(=O)=O)c1	2duv-371	P24941
Cc1cc2nc3c(=O)[nH]c(=O)nc-3n(CC(O)C(O)C(O)CO)c2cc1C	1nb9-RBF	Q969G6
Cc1cc2nc3c(=O)[nH]c(=O)nc-3n(CC(O)C(O)C(O)CO)c2cc1C	3a3b-RBF	C4TPG1
Cc1cc2nc3c(=O)[nH]c(=O)nc-3n(CC(O)C(O)C(O)COP([O-])(O)O)c2cc1C	3fgc-FMN_PO4	P07740
Cc1cc2ncn(C3OC(COP([O-])(O)O)C(O)C3O)c2cc1C	1l4e-RBZ	Q05603
Cc1cc2n[nH]c(=O)n2c2cc(-c3ccncc3)ccc12	2x8e-X8E	O14757
Cc1cc2n[nH]c(=O)n2c2ccc(-c3cccc(O)c3)cc12	2x8i-X8I	O14757
CC1CC2OC2C=CC=CC(=O)Cc2c(Cl)c(O)cc(O)c2C(=O)O1	2hkj-RDC	O05207
CC1CC2OC2C=CC=CC(=O)Cc2c(Cl)c(O)cc(O)c2C(=O)O1	2q8i-RDC	Q15120
CC1CC2OC2C=CC=CC(=O)Cc2c(Cl)c(O)cc(O)c2C(=O)O1	3cgy-RDC	P14147
Cc1cc(Br)c(O)c(-c2nc3cc(C(=[NH2+])[NH3+])ccc3[nH]2)c1	1o3j-334	P00760
Cc1ccc2c(c1)c1c(n2CC(O)C[NH2+]C2CCCCC2)CCCC1	2p6g-3LP	P14743
Cc1ccc2c(c1)C(CC(C)C)NC(=O)C(CC(C)C)NP([O-])(O)CCO2	1pe7-4BR_LEU_LEN	P00800
Cc1ccc2c(c1)sc(-c1ccc(N(C)C)cc1)[n+]2C	3mzt-TFX	P61769
Cc1c(C)c2c(c(C)c1O)CCC(C)(CCCC(C)CCCC(C)CCCC(C)C)O2	3cxi-VIT	Q90249
Cc1c(C)c2c(c(C)c1O)CCC(C)(CCCC(C)CCCC(C)CCCC(C)C)O2	3cyl-VIT	P82287
Cc1ccc2cc(C(=O)[O-])[nH]c2c1	3kab-4BL	Q13526
Cc1cc(-c2nc3ccccc3o2)cc(C)c1O	2qgc-MR4	P02766
Cc1cc(C2=NC(=O)N=C(c3ccccc3)C2)ccc1O	3dcv-55E	P11309
Cc1ccc2[nH]c(C(=O)[O-])cc2c1	3kce-4BY	Q13526
Cc1ccc2sc(COC3=CC(O)(C(=O)[O-])CC(O)C3O)cc2c1	2wks-CB6	Q48255
Cc1ccc(-c2ccc3nc(N)nc(N)c3c2)cc1	2vz0-D64	O76290
C=C1C(=CC=C2CCCC3(C)C2CCC3C(C)C(CCCC)CC(O)C(C)C)CC(O)CC1O	3afr-ICJ	P13053
C=C1C(=CC=C2CCCC3(C)C2CCC3C(C)CCCC(C)(C)O)CC(O)CC1O	2zlc-VDX	P13053
C=C1C(=CC=C2CCCC3(C)C2CCC3C(CCCC(C)(C)O)CCCC(C)(C)O)CC(O)CC1O	2hcd-BIV	Q9PTN2
C=C1C(=CC=C2CCCC3(C)C2CCC3C(C)C(CCO)CCCC)CC(O)CC1O	2zxn-JC1	P13053
Cc1ccc(-c2cccc(C(=O)N3CCCC(C)(C)C3)n2)cc1F	3ch6-311	P28845
Cc1ccc(-c2cc(C(F)(F)F)nn2-c2ccc(S(N)(=O)=O)cc2)cc1	1oq5-CEL	P00918
Cc1cccc2c(C#N)c(C(=O)NC3CC[NH+](C(C)C)CC3)n(Cc3cc(-c4ccc(Cl)s4)on3)c21	2bq6-IIB	P00742
Cc1ccc(-c2c(C[NH3+])c(CC(C)C)nc(C)c2C(=O)[O-])cc1	3o9v-10T	P27487
CC1=CC(C)C2(CO)COC(c3ccc(O)cc3)C1C2C	1zky-689	P03372
Cc1ccc(-c2nn(C(C)(C)C)c3ncnc(N)c23)cc1	1qcf-PP1	P08631
Cc1ccc(-c2nn(C(C)(C)C)c3ncnc(N)c23)cc1	2ivv-PP1	P07949
Cc1ccccc1C1CCCN1C(=O)c1cc(Cl)c(O)cc1O	3k97-4CD	P07900
Cc1ccccc1-c1cc(NCc2ccc[n+]([O-])c2)n2ncc(Br)c2n1	2r3q-5SC	P24941
Cc1ccccc1-c1c(N)c(C(=O)c2ccc(F)cc2F)cc[n+]1[O-]	3hrb-I39	Q16539
Cc1ccccc1CC(=O)Nc1cc(C)c(S(=O)(=O)NCC(=O)[O-])c(C)c1	1eko-I84	P80276
Cc1ccccc1CC(=O)Nc1cc(C)c(S(=O)(=O)NCC(=O)[O-])c(C)c1	1el3-I84	P15121
Cc1ccccc1CNC(=O)C1N(C(=O)C(O)C(Cc2ccccc2)NC(=O)c2cccc(O)c2C)CSC1(C)C	1kzk-JE2	P03369
Cc1ccccc1C(=O)NC1C(O)OC(CO)C(O)C1O	2yhx-OTG	P04807
Cc1cccc(C23SCCN2C(=O)c2ccccc23)c1	1c0t-BM1	P04585
Cc1cccc(C)c1C(=O)Nc1cc(Br)c(O)c(Br)c1	3esn-DZ1	P02766
Cc1cccc(C)c1OCC(=O)N(Cc1ccccc1)CC1C[NH2+]CC1CN(CC(C)C)S(=O)(=O)c1ccccc1	1xl2-189	P03367
Cc1cccc(C)c1OCC(=O)NC(Cc1cccc(Br)c1)C(O)CC(CC(C)C)S(=O)(=O)c1ccc(F)cc1	1xl5-190	P03367
Cc1cccc(C)c1OCC(=O)NC(Cc1ccccc1)C(O)CC(Cc1ccccc1)NC(=O)C(C(C)C)N1CCCNC1=O	2o4s-AB1	P03367
Cc1cccc(C)c1OCC(=O)NC(Cc1ccccc1)C(O)CC(Cc1ccccc1)NC(=O)C(C(C)C)N1CCCNC1=O	2q5k-AB1	O38732
Cc1cccc(C)c1OCC(=O)NC(Cc1ccccc1)C(O)CC(Cc1ccccc1)NC(=O)C(C(C)C)N1CCCNC1=O	2rkg-AB1	A0F7J4
Cc1cc(C)c(C=C2c3cc(N)ccc3NC2=O)[nH]1	2x2k-X2K	P07949
C=C1CC(CC(C)C2CCC3C(=CC=C4CC(O)CC(O)C4=C)CCCC32C)OC1=O	3a2h-TEJ	P13053
Cc1cc(C)cc(-c2nc3ccccc3o2)c1	2qge-MR6	P02766
Cc1cccc(Cc2nn(C(C)(C)C)c3ncnc(N)c23)c1	2wei-VGG	A3FQ16
Cc1cccc(Cl)c1NC(=O)c1cnc(Nc2cc(N3CC[NH+](CCO)CC3)nc(C)n2)s1	2zva-1N1	P25911
Cc1cccc(Cl)c1NC(=O)c1cnc(Nc2cc(N3CC[NH+](CCO)CC3)nc(C)n2)s1	3g5d-1N1	P00523
Cc1cccc(Cl)c1NC(=O)c1cnc(Nc2cc(N3CC[NH+](CCO)CC3)nc(C)n2)s1	3lfa-1N1	Q16539
Cc1cc(C=CC#N)cc(C)c1Nc1ccnc(Nc2ccc(C#N)cc2)n1	3mee-T27	P04585
Cc1cccc(CNC(=O)C2CCCN2C(=O)C([NH3+])Cc2ccccc2)c1	2zf0-51U	P00734
Cc1ccc(CC(NC(=O)C(C)NC(=O)C2CCCN2C(=O)C2CC3CCCCC3N2C(=O)C([NH3+])CCC[NH2+]C(=[NH2+])[NH3+])C(N)=O)cc1	3bv9-DAR_OIC_PRO_DAL_4PH_NH2	P00734
Cc1ccc(CC([NH3+])CNc2nnc(-c3ccc4[nH]ncc4c3)s2)cc1	3l9n-L9N	P17612
Cc1ccc(C)c(OCC(O)C[NH+]2CCOCC2)c1	2of0-CMZ	P56817
Cc1cccc(C(=O)[O-])c1OC(=O)C1CC1	3f28-S7B	P00800
Cc1cc(C)cc(S(=O)(=O)c2cccc(N)c2C#N)c1	1jlq-SBN	P04585
Cc1ccc(Cl)c(N(CC#N)c2cc(Nc3ccc(OCC(O)C[NH+](C)C)cc3)ncn2)c1	2iw6-QQ2	P24941
Cc1cccc(Nc2nc(NC3CCCCC3[NH3+])ncc2C(N)=O)c1	3fqe-P5C	P43405
Cc1ccc(C(N)=O)cc1-c1nnc2ccc(CCc3ccc(F)cc3F)cn21	3kf7-L9G	Q16539
Cc1ccc(COC2CC(C(=O)NC(CCCC[NH3+])C(O)c3nc4ccccc4o3)N(C(=O)C(CCc3ccccc3)NC(=O)OCc3ccccc3)C2)cc1	3e0p-B3C	Q16651
Cc1ccc(CO)cc1N(c1ccnc(Nc2cc(N3CCOCC3)cc(S(C)(=O)=O)c2)n1)C(C)C	2xvd-AS6	P54760
Cc1ccc(C(=O)N2CCC(Cc3ccccc3)CC2)cc1	2nsd-4PI	P0A5Y6
Cc1ccc(C(=O)Nc2cccc(C(F)(F)F)c2)cc1Nc1cncc(C(N)=O)c1	3dko-IHZ	Q15375
Cc1ccc(C(=O)Nc2ccc(CN3CC[NH+](C)CC3)c(C(F)(F)F)c2)cc1C#Cc1c[nH+]c2cccnn12	3oxz-0LI	P00520
Cc1ccc(C(=O)Nc2ccc(CN3CC[NH+](CCO)CC3)c(C(F)(F)F)c2)cc1C#Cc1c[nH+]c(C(N)=O)n1C	3oy3-XY3	P00520
Cc1ccc(C(=O)NCCC2CCCC2)cc1C(=O)Nc1ccc(N)nc1	3cpb-C92	P35968
Cc1ccc(C(=O)NCCO)cc1-n1cnc(OCc2ccc(F)cc2F)c(Cl)c1=O	3roc-29A	Q16539
Cc1ccc(Nc2cc(-c3ccccc3)ncn2)cc1NS(C)(=O)=O	3exo-5MS	P56817
Cc1ccc(N)cc1C(=O)NC(C)c1cccc2ccccc21	3e9s-TTT	P0C6U8
Cc1ccc(NC(=O)c2cccc(C(F)(F)F)c2)cc1-n1cc2cnc(N)nc2[n+](C)c1=O	2hiw-7MP	P00519
Cc1ccc(NC(=O)c2ccc(CN3CC[NH+](C)CC3)cc2)cc1Nc1nccc(-c2cccnc2)n1	1xbb-STI	P43405
Cc1ccc(NC(=O)c2ccc(CN3CC[NH+](C)CC3)cc2)cc1Nc1nccc(-c2cccnc2)n1	2hyy-STI	P00519
Cc1ccc(NC(=O)c2ccc(CN3CC[NH+](C)CC3)cc2)cc1Nc1nccc(-c2cccnc2)n1	2oiq-STI	P00523
Cc1ccc(NC(=O)c2ccc(CN3CC[NH+](C)CC3)cc2)cc1Nc1nccc(-c2cccnc2)n1	3gvu-STI	P42684
Cc1ccc(NC(=O)c2ccc(CN3CC[NH+](C)CC3)cc2)cc1Nc1nccc(-c2cccnc2)n1	3ms9-STI	P00520
Cc1ccc(NC(=O)c2ccc(CN3CC[NH+](C)CC3)cc2)cc1Nc1nccc(-c2cccnc2)n1	3pyy-STI	Q59FK4
Cc1ccc(NC(=O)c2ccc(C[NH+]3CCC(N(C)C)C3)c(C(F)(F)F)c2)cc1Nc1nccc(-c2cncnc2)n1	2e2b-406	P00519
Cc1ccc(NC(=O)c2cccnc2)cc1Nc1nccc(-c2cccnc2)n1	1fpu-PRC	P00520
Cc1cc(C)n(COC(=O)NC(CS(C)(=O)=O)C(=O)NC(CC(C)C)C(O)CC(C)C(=O)NC(C(=O)NCC(C)C)C(C)C)n1	2g94-ZPQ	P56817
CC1(C)CC(NC(=S)Nc2ccc(S(N)(=O)=O)cc2Cl)CC(C)(C)N1O	3eft-3BS	P00918
CC1CCC([NH2+]Cc2ccc3c(c2)Cc2c(-c4ccc(C(=O)[O-])cc4)n[nH]c2-3)CC1	2e9o-A58	O14757
Cc1cc(CNS(=O)(=O)c2cccc(NC=C3CCOC3=O)c2)nc(N)n1	2qg0-A94	P07900
CC1CCC(O)C1NC(=O)C(Cc1ccccc1)CC(O)CN1CCN(C(=O)c2cnc(N3CCN(C)CC3)c(Cl)n2)CC1C(=O)NC(C)(C)C	2bpy-3IN	P04587
CC1CCC(O)C1NC(=O)C(Cc1ccccc1)CC(O)C[NH+]1CCN(C(=O)CCc2cccnc2)CC1C(=O)NC(C)(C)C	2bpv-1IN	P04587
C=C1CCC(O)CC1=CC=C1CCCC2(C)C1CCC2C(C)CCCC(C)(C)O	3a51-VDY	C4B644
Cc1ccc(O)cc1Nc1cc[nH+]c2cc(-c3csc(C=O)n3)ccc12	2zaz-GK1	Q16539
Cc1ccc(OCC(O)C(C)[NH2+]C(C)C)c2c1CCC2	3ny8-JRZ	P00720
CC1=CC(C(=O)NCC2CCC(C(=[NH2+])[NH3+])CC2)n2c(=O)n(CC(c3ccccc3)c3ccccc3)c(=O)n2C1	1c4v-IH2	P00734
Cc1c(CC(=O)[O-])sc2ccc(Cl)cc12	3n1v-3N1	P14324
Cc1c(CCOP([O-])(O)OP([O-])(O)O)sc[n+]1Cc1cnc(C)nc1N	1ozf-TPP	P27696
Cc1c(CCOP([O-])(O)OP([O-])(O)O)sc[n+]1Cc1cnc(C)nc1N	2pan-TDP	P0AEP7
Cc1c(CCOP([O-])(O)O)sc[n+]1Cc1cnc(C)nc1N	3nl6-TPS	Q6FV03
Cc1c(CCO)sc[n+]1Cc1cnc(C)nc1N	1ig3-VIB	Q9R0M5
Cc1ccc(S)c(S)c1	2z94-TLD	P0C6X7
Cc1ccc(S(=O)(=O)N2CCSCC2C(=O)NC(CC(C)C)C(=O)[O-])cc1	1j4i-TST	P62942
Cc1ccc(S(=O)(=O)[NH2+]C(Cc2cccc(C(N)=[NH2+])c2)C(=O)N2CCCCC2)cc1	1pph-APM_PIP_TOS	P00760
Cc1ccc(S([O-])(O)O)cc1	3n6u-TSU	P94678
Cc1c(Cl)c(C#N)ccc1N1C(=O)C2C(O)CCN2C1=O	2nw4-8NH	P15207
Cc1cc(-n2ccnc2)cc2nc(-c3c(NCc4ccccn4)cc[nH]c3=O)[nH]c21	2oj9-BMI	P08069
CC1(C)C[n+]2c(CSC(NC3CCCCC3)=[NH+]C3CCCCC3)csc2N1	3odu-ITD	P61073
Cc1ccnc2c1NC(=O)c1cccnc1N2C1CC1	1vrt-NVP	P04585
Cc1ccnc2c1NC(=O)c1cccnc1N2C1CC1	3lp1-NVP	P04585
Cc1ccn(-c2ccc3c(c2)NCC3(C)C)c(=O)c1-c1ccc2nc(N)ncc2c1	3cp9-C19	P35968
Cc1ccn(-c2cccc(C(F)(F)F)c2)c(=O)c1-c1ccc2nc(N)ncc2c1	3cpc-C52	P35968
Cc1cc(Nc2cc(N3CC[NH+](C)CC3)nc(Sc3ccc(NC(=O)C4CC4)cc3)n2)[nH]n1	3e5a-VX6	O14965
CC1(C)CNc2cc(NC(=O)c3cccnc3NCc3ccncc3)ccc21	3efl-706	P35968
Cc1cc(Nc2nc(-c3ccccc3)nc3ccccc32)n[nH]1	2jc6-QPP	Q8IU85
Cc1cc(Nc2nn(-c3ccccc3)c(=O)c3ccccc32)n[nH]1	3p9j-P9J	O14965
Cc1ccnc(CNC(=O)Cn2c(C)cnc(NCC(F)(F)c3ccccn3)c2=O)c1F	1mu8-CDB	P00734
Cc1cc(NC(=O)c2cccc(C(F)(F)F)c2)ccc1Oc1ncccc1-c1ccncn1	3o50-LJE	B4DX16
CC1CCN(C(=O)CC#N)CC1N(C)c1ncnc2[nH]ccc21	3lxn-MI1	P29597
CC1CC([NH3+])c2cc(S(N)(=O)=O)sc2S1(=O)=O	1cim-PTS	P00918
Cc1cc(N)nc(CC2C[NH2+]CC2OCCNCC(F)(F)C2CCCCN2)c1	3nlt-3XF	P29473
Cc1cc(N)nc(CC2C[NH2+]CC2OCC[NH2+]CCc2cccc(F)c2)c1	3nlf-JRS	P29473
Cc1cc(N)nc(CC2C[NH2+]CC2OCC[NH2+]CCc2cccc(F)c2)c1	3nlg-JSR	P29473
Cc1cc(N)nc(CC2C[NH2+]CC2OCC[NH2+]CCc2cccc(F)c2)c1	3nlq-JRR	P29476
Cc1cc(N)nc(CCc2cccc(CCc3cc(C)nc(N)c3)c2)c1	3n5r-XFH	P29473
Cc1cc(N)nc(CCc2cccc(CCc3cc(C)nc(N)c3)c2)c1	3n5v-XFH	P29476
Cc1cc(N)nc(CCc2cccc(CCc3cc(C)nc(N)c3)n2)c1	3n5p-XFM	P29473
Cc1cc(N)nc(CCc2cc(N)cc(CCc3cc(C)cc(N)n3)c2)c1	3n5q-XFN	P29473
Cc1cc(NS(=O)(=O)c2ccccc2)cc(OCCNc2cc[nH+]cc2)c1	1uvt-I48	P00735
Cc1cc(O)c2c(c1)C(=O)c1cc(O)cc(O)c1C2=O	2rhr-EMO	P16544
Cc1cc(O)c2c(c1)C(=O)c1cc(O)cc(O)c1C2=O	3bqc-EMO	P68400
CC1=C(C(=O)c2ccccc2)C(c2cccc(O)c2)NC(=S)N1C	2ieh-MOY	P52732
Cc1cc(OCC2(CO[NH+]=C([NH3+])[NH3+])CC2)cc(OS(=O)(=O)c2ccccc2S(C)(=O)=O)c1	1t4u-81A	P00734
CC1(C)C(O)CCC2(C)C1CCC1(C)C2C(=O)C=C2C3CC(C)(C(=O)[O-])CCC3(C)CCC21C	2w4q-CBW	Q8N8N7
Cc1cc(OCC(C)Nc2cc[nH+]cc2)cc(C(=O)N(CCC(=O)NC(C)(C)C)C(C)C)c1	2uuk-897	P00734
Cc1cc(OCC(=O)[O-])cc(C)c1Cc1ccc(O)c(Cc2ccccc2)c1	3neo-G24	P02766
Cc1cc(OCC(=O)[O-])cc(C)c1Cc1ccc(O)c(Cc2ccccc2)c1	3nex-G24	P02766
CC1(C)COC(=O)CCCCCCCCCCCOC(=O)C2CCCCN2C(=O)C1=O	1fki-SB1	P62942
CC1(C)C(OC(=O)CCC(=O)[O-])CCC2(C)C1CCC1(C)C2C(=O)C=C2C3CC(C)(C(=O)[O-])CCC3(C)CCC21C	1hdc-CBO	P19992
CC1(C)C(OC(=O)CCC(=O)[O-])CCC2(C)C1CCC1(C)C2C(=O)C=C2C3CC(C)(C(=O)[O-])CCC3(C)CCC21C	2bel-CBO	P28845
CC1=CC(=O)OC1CC(=O)[O-]	3hf5-3ML	C5MR76
CC1(CC(=O)[O-])C=CC(=O)O1	3hfk-4ML	C5MR76
CC1=C(C(=O)OCCO)C(c2ccc(C#N)cc2)NC(=O)N1c1cccc(C(F)(F)F)c1	3q77-2HY	P08246
Cc1c(F)c(Oc2cccc(C(=[NH2+])[NH3+])c2)[nH+]c(Oc2cccc(C(=[NH2+])[NH3+])c2)c1F	1qb6-623	P00760
CC1CN1C1=CC(=O)c2c(c(CO)c(-c3ccccc3)n2C)C1=O	1h69-ARH	P15559
CC1CN(c2ccc(F)cc2C(F)(F)F)CCN1S(=O)(=O)c1ccc(C(N)=O)cc1Cl	3h6k-33T	P28845
CC1CN(c2ccc([N+](=O)[O-])cc2)CCN1S(=O)(=O)c1ccc(C(C)(C)C)cc1	3czr-3CZ	P28845
Cc1cn(-c2cc(C(=O)Nc3ccc(C)c(NC(=O)c4ccno4)c3)cc(C(F)(F)F)c2)cn1	3dzq-IFC	Q6P4R6
Cc1cn(-c2cc(NC(=O)c3ccc(C)c(C=Cn4cnc5c4ncnc5NC4CC4)c3)cc(C(F)(F)F)c2)cn1	3kfa-B91	P00520
Cc1cn(C2CC(N=[N+]=N)C(CO)O2)c(=O)[nH]c1=O	3b9l-AZZ	P02768
Cc1cn(C2CC(O)C(CO)O2)c(=O)nc1N	3kfx-MCY	P27707
Cc1cn(C2CC(O)C(CO)O2)c(=O)n(C)c1=O	3lfm-3DT	Q9C0B1
Cc1cn(C2CC(O)C(CO)O2)c(=O)[nH]c1=O	3hp1-LLT	P27707
Cc1cn(C2CC(O)C(COP([O-])(O)O)O2)c(=O)[nH]c1=O	1h5s-TMP	P37744
Cc1cn(C2CC(O)C(COP([O-])(O)O)O2)c(=O)[nH]c1=O	2par-TMP	P76491
Cc1cn(C2CC(O)C(COP([O-])(O)O)O2)c(=O)[nH]c1=O	3hw4-TMP	Q9Q0U9
Cc1cn(C2CC(O)C(COP([O-])(O)OP([O-])(O)Oc3ccccc3)O2)c(=O)[nH]c1=O	3rc1-TLO	B3TMR8
Cc1cn(C2CC(O)C(COP([O-])(O)OP([O-])(O)OC3OC(C)C(O)C(O)C3O)O2)c(=O)[nH]c1=O	2x0f-TRH	Q7BG50
Cc1cn(C2CC(O)C(COP([O-])(O)OP([O-])(O)O)O2)c(=O)[nH]c1=O	1lvw-TYD	O27819
Cc1cn(C2CC(O)C(COP([O-])(O)OP([O-])(O)O)O2)c(=O)[nH]c1=O	2x0e-TYD	Q7BG50
Cc1cn(C2CC(O)C(COP([O-])(O)OP([O-])(O)O)O2)c(=O)[nH]c1=O	3m9v-TYD	B3TMR1
Cc1cn(C2CC(O)C(COP([O-])(O)OP([O-])(O)O)O2)c(=O)[nH]c1=O	3otg-TYD	Q8KNF2
Cc1cn(C2CC(O)C(COP([O-])(O)OP([O-])(O)OP([O-])(O)O)O2)c(=O)[nH]c1=O	2j4q-TTP	P28248
Cc1cn(C2CC(O)C(COP([O-])(O)OP([O-])(O)OP([O-])(O)O)O2)c(=O)[nH]c1=O	2uz3-TTP	Q9PPP5
Cc1cn(C2CC(O)C(COP([O-])(O)OP([O-])(O)OP([O-])(O)O)O2)c(=O)[nH]c1=O	2wvj-TTP	P04183
Cc1cn(C2CC(OP([O-])(O)OCC3OCCC3O)C(COP([O-])(O)OC3CC(n4cnc5c4nc(N)[nH]c5=O)OC3CO)O2)c(=O)[nH]c1=O	1rrc-DG_DT_DC	P06855
CC1=CNC2=C(S(=O)(=O)NC(CCCNC(N)=[NH2+])C(=O)N3CCC(C)CC3C(=O)[O-])CC=CC2=C1	1etr-MQI_ARG_MCP	P00735
Cc1cncc2cccc(S(=O)(=O)N3CCC[NH2+]CC3C)c12	1q8u-H52	P00517
Cc1cnc(Cl)c2c1[nH]c1ccc3cc(O)ccc3c12	3owl-19E	Q5U5J2
Cc1cnc(Cl)c2c3ccc4cc(O)ccc4c3[nH]c21	3owk-18E	Q5U5J2
Cc1cnc(Nc2ccccc2)nc1-c1c[nH]c(C(=O)NC(CO)c2ccccc2)c1	3i4b-Z48	P49841
Cc1cnc(Nc2ccc(CC#N)cc2)nc1Nc1cc(C2CC2)[nH]n1	3lm0-EBD	O94768
Cc1cnc(NCC(F)(F)c2ccccn2)c(=O)n1CC(=O)NCc1ncccc1F	1mu6-CDA	P00734
CC1C[NH2+]CCN1S(=O)(=O)c1cccc2cnccc21	1ydr-IQP	P00517
CC1C[NH+](CC2(C(N)=O)CC2)CCN1S(=O)(=O)c1ccc(C(C)(O)C(F)(F)F)cc1	3d4n-D4N	P28845
Cc1c[nH]c(C=C2C(=O)Nc3ccccc32)c1CCC(=O)[O-]	1fgi-SU1	P11362
CC1(C)OC2C3OS(=O)(=O)OC3COC2(COS(N)(=O)=O)O1	1eou-SMS	P00918
Cc1c(O)cccc1C(=O)NC(Cc1ccccc1)C(O)C(=O)N1CSC(C)(C)C1C(=O)NC(C)(C)C	1mrx-K57	P03367
Cc1c(O)cccc1C(=O)NC(CSc1ccccc1)C(O)C[NH+]1CC2CCCCC2CC1C(=O)NC(C)(C)C	1ohr-1UN	Q9Q288
Cc1c(O)cccc1C(=O)NC(CSc1ccccc1)C(O)C[NH+]1CC2CCCCC2CC1C(=O)NC(C)(C)C	2pyn-1UN	P03367
Cc1c(O)cccc1C(=O)NC(CSc1ccccc1)C(O)C[NH+]1CC2CCCCC2CC1C(=O)NC(C)(C)C	2r5q-1UN	Q50CM2
C=C1C(O)CC(=CC=C2CCCC3(C)C2CCC3C(C)CCCC(C)(C)O)CC1O	1rjk-VDZ	P13053
C=C1C(O)CC(=CC=C2CCCC3(C)C2CCC3C(C)C=CC(O)C23CC4CC(CC(C4)C2)C3)CC1O	2zmh-NYA	P13053
C=C1C(O)CC(=CC=C2CCCC3(C)C(=C(C)CCCC(C)(C)O)CCC23)CC1O	2o4j-VD4	P13053
C=C1C(O)CC(=CC=C2CCCC3(C)C(=C(C)CCCC(C)(C)O)CCC23)CC1O	2o4r-VD5	P13053
CC1C(=O)NCCCN1C(=O)CC([NH3+])Cc1cc(F)c(F)cc1F	2iiv-565	P27487
CC1(C)SC2C(NC(=O)Cc3ccccc3)C(=O)N2C1C(=O)[O-]	3kp2-PNN	Q5HLN6
CC1(C)SC2C(NC(=O)C([NH3+])c3ccccc3)C(=O)N2C1C(=O)[O-]	3ita-AIC	P08506
C=C1CSC(C(C=O)NC(=O)C(CCCC[NH3+])NC(=O)CCC(NC(=O)C(C)NC(C)=O)C(=O)[O-])N=C1C(=O)[O-]	1o07-MXG	P00811
C=C1CSC(C(NC(=O)Cc2cccs2)C(=O)[O-])=NC1C(=O)[O-]	1kvl-THN	P00811
Cc1nc2c3ccccc3nc(SCc3nc4ccccc4[nH]3)n2n1	2y0j-AXC	Q9Y233
Cc1nc2ccc3ccc(CNc4ccc5c(c4)CN(C(CCC(=O)[O-])C(=O)[O-])C5=O)cc3c2c(=O)[nH]1	1syn-F89	P0A884
Cc1nc2ccc3ccc(CNc4ccc5c(c4)CN(C(CCC(=O)[O-])C(=O)[O-])C5=O)cc3c2c(=O)[nH]1	1tsd-F89	P0A886
Cc1nc2ccccc2n1Cc1ccc2c(c1)nc(CNc1ccc(C(=[NH2+])[NH3+])cc1)n2C	1g32-R11	P00734
CC1=Nc2c(N)nc(N)nc2NC1(C)C	3jq8-DX3	Q581W1
Cc1nc2c(s1)-c1nc(N=C3C=C([N+](=O)[O-])C=CC3)ncc1CC2	2x1n-X1N	P24941
Cc1nc2[n+](c(-c3ccc(Cl)cc3Cl)c1C[NH3+])C=C(C(=O)N1CCOCC1)[NH2+]2	3nox-6A5	P27487
Cc1nc(-c2ccnc(Nc3cc(C)cc(C)c3)n2)sc1C(=O)NC(C)CO	3emg-685	P43405
CC1=NC(CC2=NCC(CCC(=O)[O-])=C2CC(=O)[O-])C(CCC(=O)[O-])=C1CC(=O)[O-]	3eq1-DPM	P08397
Cc1nc(C)c(-c2ccnc(Nc3cccc(O)c3)n2)s1	1pxm-CK5	P24941
Cc1ncc(COP([O-])(O)O)c(CNc2cccc(C(=O)[O-])c2)c1O	1b9i-PXG	O52552
Cc1ncc(COP([O-])(O)O)c(C=NC(CCC([O-])[O-])C(=O)[O-])c1O	1gde-GLU_PLP	O59096
Cc1ncc(COP([O-])(O)O)c(CNC(C=COCC[NH3+])C(=O)[O-])c1O	1cl2-PPG	P06721
Cc1ncc(COP([O-])(O)O)c(CNC(C=COCC[NH3+])C(=O)[O-])c1O	1m7y-PPG	P37821
Cc1ncc(COP([O-])(O)O)c(CNC(C(=O)[O-])C(C)O)c1O	2vmx-PLP_ALO	Q7SIB6
Cc1ncc(COP([O-])(O)O)c(C[NH2+]C2CONC2=O)c1O	1i2l-DCS	P28305
Cc1ncc(COP([O-])(O)O)c(C[NH2+]C(COP([O-])([O-])O)Cc2c[nH]cn2)c1O	1uu1-PMP_HSA	Q9X0D0
Cc1nccn1CCCCc1ccc(CC(=O)NC(CO)C(=O)NC(CCCC[NH3+])C(=O)NCCC2CCCCC2)cc1	1iyk-MIM	P30418
Cc1nc(CN2CCN(C(C(=O)NC(Cc3ccccc3)C(O)CN(CC(C)C)S(=O)(=O)c3ccc(C=NO)cc3)C(C)C)C2=O)cs1	1yt9-OIS	P03366
Cc1nc(COc2ccc(CC(NC(=O)OC3COC4OCCC34)C(O)CN(CC(C)C)S(=O)(=O)c3ccc4c(c3)OCO4)cc2)cs1	2fdd-385	Q7SPG9
Cc1nc(C(=O)[O-])sc1CCOP([O-])(O)O	3qh2-3NM	P25053
Cc1nc(C(=O)[O-])sc1CCOP([O-])(O)OP([O-])(O)OCC1OC(n2cnc3c2ncnc3N)C(O)C1O	1rp0-AHZ	Q38814
Cc1ncnc2c1ncn2C1CC(O)C(CO)O1	1ovg-MDR	P0ABP8
Cc1ncnc2c1ncn2C1OC(C(C)O)C(O)C1O	1oum-TAL	P0ABP8
Cc1ncnc2c1ncn2C1OC(C(C)O)C(O)C1O	1ov6-DBM	P0ABP8
Cc1nc(N)c2cccc(C(=O)Nc3cc[nH]n3)c2n1	3prz-3RZ	P48736
Cc1nc(N)c(COP([O-])(O)O)c(C=O)c1O	1o69-X04	Q9S5Y7
Cc1nc(N)nc2c1nc(-c1cn[nH]c1)c(=O)n2C(C)C	3oaw-OAW	P48736
Cc1nc(N)ncc1-c1nc2cc(C[NH+]3CCN(S(C)(=O)=O)CC3)sc2c(N2CCOCC2)n1	3l17-JZY	P48736
Cc1nc(N)nc(-n2c3ccccc3nc2Nc2cc[nH]n2)n1	3qar-QAR	P48736
Cc1nc(N)sc1-c1ccnc(Nc2cccc(-n3oo3)c2)n1	2x4f-16X	Q86YV6
Cc1nc(=O)c2cc(CN(C)c3ccc(C(=O)NC(CCC(=O)[O-])C(=O)[O-])s3)ccc2[nH]1	2tsr-D16	P45352
CC1NC(=O)C(C)N(C)C(=O)C2CCCN2C(=O)C(NC(=O)C([NH3+])Cc2ccccc2)COC(=O)C2CC(C)CN2C1=O	3kti-OTT_PHE_SER_PRO_ALA_MAA_MP8	P80244
CC1[NH2+]C([NH3+])CCC1CNCCN1C(Cl)=CN=C(NCC(F)(F)c2ccccn2)C1O	2bxu-C1D	P00734
Cc1[nH]c2ccccc2c1CC(=O)NC(Cc1ccccc1)C(=O)N(C)c1ccccc1	2xde-1B0	Q9IQV5
Cc1[nH]c2cccc[n+]2c1-c1ccnc(Nc2ccc(OCC(O)C[NH+](C)C)cc2)n1	1oir-HDY	P24941
Cc1[nH]c2ncccc2c1C1CCN(C(=O)C2(c3ccccn3)CC2)C1	3gmd-2M3	P50172
Cc1[nH]c(-c2ccccc2)nc1C(=O)[O-]	2xp5-4FF	Q13526
Cc1[nH]c(-c2cccc(Cl)c2)nc1C(=O)[O-]	2xp6-4G2	Q13526
Cc1[nH]cc(-c2ccnc(Nc3ccc(N4CCN(C(=O)CO)CC4)cc3)n2)[n+]1C(C)C	2vv9-IM9	P24941
Cc1[nH]cc(-c2nc(Nc3ccc(C(=O)N4CCC([NH+](C)C)C4)cc3)ncc2F)[n+]1C(C)C	2w17-I19	P24941
Cc1[nH]nc2ccc(-c3cc(OCC([NH3+])Cc4c[nH]c5ccccc45)cnc3-c3ccoc3)cc12	3kkv-B99	P00517
Cc1nnc2nc3ccc([N+](=O)[O-])cc3c(-c3ccccc3Cl)nc1-2	3le6-2BZ	P24941
Cc1nnc(-c2ccc3occ(-c4ccc(S(C)=O)cc4)c3c2)o1	3gb2-G3B	P49841
Cc1nnc(-c2cnn(C)c2N)n1CCCn1ccnc1	3q2f-OAM	Q9UIF8
Cc1nnc(Cl)c2ccccc12	2xdu-MT0	P07900
Cc1n[nH]c2ccc(-c3cncc(OCC([NH3+])Cc4ccc(Br)cc4)c3)cc12	2uzw-SS4	P00517
Cc1n[nH]c2ccc(-c3cncc(OCC([NH3+])Cc4ccccc4)c3)cc12	2uzt-SS3	P00517
Cc1n[nH]c2ccc(-c3cncc(OCC([NH3+])Cc4cccc(OCC5CCCCC5)c4)c3)cc12	2uzv-SS5	P00517
Cc1n[nH]c2ccc(-c3cncc(OCC([NH3+])Cc4c[nH]c5ccccc45)c3)cc12	2jds-L20	P00517
Cc1n[nH]c(-c2nc3cc(C(C)C)ccc3[nH]2)c1C(=O)NC1CC[NH+](C)CC1	3nlb-5BE	O14757
CC1OC2CC(=O)OC2C2=C1C(=O)c1c(O)cccc1C2=O	1n5v-NOM	Q53908
Cc1oc(-c2ccccc2)nc1CCCc1ccc(CC(C(=O)[O-])n2cccc2)cc1	2q8s-L92	P37231
Cc1oc(-c2ccccc2)nc1CCCc1ccc(CC(C(=O)[O-])n2nccn2)cc1	3ia6-UNT	P37231
Cc1occc1C(=O)NC(Cc1nc2ccccc2[nH]1)C(=O)[O-]	3kag-4D7	Q13526
Cc1occc1C(=S)Nc1ccc(Cl)c(C=NOC(C)(C)C)c1	1rt5-UC2	P04585
CC1(O)CCC2C3CCC4=CC(=O)CCC4=C3C=CC21C	1xow-R18	P10275
CC1OC(n2cnc3c2ncnc3N)C(O)C1O	1i9c-5AD	P80078
CC1OC(n2cnc3c2ncnc3N)C(O)C1O	3ci3-5AD	Q50EJ2
CC1OC(n2cnc3c2ncnc3N)C(O)C1O	3iix-5AD	Q9X0Z6
CC1OC(OC2C(O)C(O)C(OC3C(O)C(O)C(O)OC3CO)OC2CO)C(O)C(O)C1[NH2+]C1C=C(CO)C(O)C(O)C1O	2ecp-ACR	P00490
CC1OC(OP([O-])(O)OP([O-])(O)OCC2OC(n3cnc4c3nc(N)[nH]c4=O)C(O)C2O)C(O)CC1[NH3+]	3dr7-GPD	O85354
Cc1onc(-c2ccccc2)c1-c1ccnc(N)n1	3fmj-FMJ	Q16539
CC1SCc2ncnc(N3CCN(C(=O)C([NH3+])Cc4c[nH]c5ccccc45)CC3)c21	3ow3-SMY	P05132
CCC1C2C3CCC[NH+]3C(c3ccc(C(=[NH2+])[NH3+])cc3)C2C(=O)N1Cc1ccc2c(c1)OCO2	1ype-UIP	P00734
CCC1C2C(C(=O)N1Cc1ccc3c(c1)OCO3)C(c1ccc(C(=[NH2+])[NH3+])cc1)[NH+](C)C2(C)C	1ypj-UIB	P00734
CCc1cc2c(cc1OS(N)(=O)=O)CCC1C3CCC(OS(N)(=O)=O)C3(C)CCC21	2x7t-WZB	P00918
CCC1Cc2cc(O)ccc2C2=C1c1ccc(O)cc1CC2CC	1l2j-ETC	Q92731
CCc1cc(-c2cccnc2)nn1-c1ccc(NC(=O)c2cccnc2)cc1	3otq-MZL	P34913
C=Cc1ccc(-c2ccc(C(=O)NCC(C)C)cc2C(=O)[O-])c(CNc2ccc(C(N)=[NH2+])cn2)c1	2ec9-24X	P08709
CC(c1ccc(-c2ccc(S(N)(=O)=O)cc2)o1)=C1SC(=[NH2+])NC1=O	2uzn-C96	P24941
C=CC1=C(C)C(=Cc2[nH]c(C=C3N=C(C=C4NC(=O)C(C)=C4C=C)C(C)=C3CCC(=O)[O-])c(CCC(=O)[O-])c2C)NC1=O	2vue-BLA	P02768
C=CC1=C(C)C(=Cc2[nH]c(C=C3N=C(C=C4NC(=O)C(C)=C4C=C)C(C)=C3CCC(=O)[O-])c(CCC(=O)[O-])c2C)NC1=O	3kvs-BLA	P00306
CCc1cccc(CC)c1NC(=O)n1cc2c(c1)C(=[NH+]C(=O)c1ccc(N3CC[NH+](C)CC3)cc1)N=N2	2bmc-MPY	O14965
C=Cc1cc(C)cc(CC)c1C1C(=O)N2CCOCCN2C1=O	3pgq-GY3	Q00955
CCc1cc(Cl)c(OC)c(C(=O)NCC2CCC[NH+]2CC)c1O	3pbl-ETQ	P35462
CC(c1ccc(N2CCC(NS(=O)(=O)C=Cc3ccc(Cl)s3)C2=O)c(F)c1)[NH+](C)C	2wyg-461	P00742
CC(c1ccc(N2CCC(NS(=O)(=O)C=Cc3ccc(Cl)s3)C2=O)c(F)c1)[NH+](C)C	2wyj-898	P00742
CC(c1ccc[nH]1)=C1c2cc(NC(N)=O)ccc2NC1=O	2pe1-517	O15530
C=CC1=C(C)C(=O)NC1=Cc1[nH]c(C=C2N=C(C=C3NC(=O)C(C)=C3C=C)C(C)=C2CCC(=O)[O-])c(CCC(=O)[O-])c1C	3ajh-BL3	Q55891
CCC1CCN(C(=O)C(CCCNC(N)=[NH2+])NS(=O)(=O)c2cccc3c2cccc3N(C)C)CC1	1fpc-ANS_ARG_EPI	P00734
C=Cc1cc(O)cc2nc(-c3ccc(O)c(F)c3)oc21	1x7b-041	Q92731
CCc1cc(OCC(C)(C)C[NH+](C)C)c(F)c(C(Nc2ccc(C(N)=[NH2+])cc2)C(=O)[O-])c1	2v3o-I26	P00734
CCc1cnn2c1nc(-c1c(F)cccc1F)cc2NCc1cnc(N)nc1	2r3m-SCX	P24941
CCC1C(=O)Nc2ccc(F)cc2N1C(=O)OC(C)C	2ops-HBQ	P04585
CCC1(C(=O)NC(C)c2ccc(Cl)cc2)C(C)C1(Cl)Cl	7std-CRP	P56221
CC(c1nc(-c2ccc(S(C)(=O)=O)cc2)no1)C([NH3+])C(=O)n1cccc1	2hha-3TP	P27487
CCc1nc(CC(C)(C)C)c(C[NH3+])c(-c2ccc(C)cc2)c1CC(=O)[O-]	3o95-01T	P27487
CCc1nn(-c2c(Cl)cc(Cl)cc2Cl)c2nc(Cc3ccc(O)c(O)c3)[nH]c(=O)c12	2b54-D05	P24941
CCCc1cc2cc(CC(N)=O)[nH]c2c(CC(=O)[O-])c1	1oxl-IDA	P59071
CCCc1cc2c(=O)n(C)oc2c(CCC)c1OC(C(=O)[O-])c1ccc(C(C)C)cc1	1zeo-C01	P37231
CC=Cc1cc2c(s1)C(O)C(O)CC2(O)C(=O)[O-]	2xd9-XD9	Q48255
CCCC1(CCc2ccccc2)CC(O)=C(C(CC)c2cccc(NS(=O)(=O)c3ccc(C(F)(F)F)cn3)c2)C(=O)O1	2o4l-TPV	P03367
CC(C)c1cccc(C(C)C)c1O	3f33-PFL	P02791
C=CCC1C=C(C)CC(C)CC(OC)C2OC(O)(C(=O)C(=O)N3CCCCC3C(=O)OC(C(C)=CC3CCC(O)C(OC)C3)C(C)C(O)CC1=O)C(C)CC2OC	3ihz-FK5	A5K8X6
C=CCC1C=C(C)CC(C)CC(OC)C2OC(O)(C(=O)C(=O)N3CCCCC3C(=O)OC(C(C)=CC3CCC(O)C(OC)C3)C(C)C(O)CC1=O)C(C)CC2OC	3o5r-FK5	Q13451
CC(C)c1ccc(COc2ccc(CC(=O)NCC[NH3+])cc2Cl)cc1	2bu7-TF3	Q15119
CCCc1cc(C(=O)c2ccc(-c3ccccc3)cc2)ccc1OCCCN1CCCc2c(OC(C)(C)C(=O)[O-])cccc21	3gbk-2PQ	P37231
CC(C)c1c(C(=O)Nc2ccccc2O)c(-c2ccccc2)c(-c2ccc(F)cc2)n1CCC(O)CC(O)CC(=O)[O-]	3cct-3HI	P04035
CC(C)c1c(C(=O)NC(CO)c2ccccc2)nc(-c2ccc(F)cc2)n1CCC(O)CC(O)CC(=O)[O-]	3ccz-5HI	P04035
CC(C)c1cnc(Nc2ccc(S(N)(=O)=O)cc2)s1	2bts-U32	P24941
CC(C)c1cnc(NC(=O)Cc2cccnc2)s1	2btr-U73	P24941
CC(C)c1cnn2c1nc(NC1CCC([NH3+])CC1)cc2Nc1ccc(S(=O)(=O)N(C)C)cc1	1y91-CT9	P24941
CC(C)c1cnn2c1nc(NC(CO)C(O)CO)cc2NCc1ccccc1	3ns9-NS9	P24941
CC(=Cc1coc2nc(N)nc(N)c12)c1ccccc1O	3k45-51P	P00375
CCCc1c(OCCCn2ccc3c2cccc3OC(C)(C)C(=O)[O-])ccc2cc(C(=O)c3ccccc3)ccc21	2hwr-DRD	P37231
CCCc1c(OCCCn2ccc3cc(OCC(=O)[O-])ccc32)ccc2cc(C(=O)c3ccccc3)ccc21	2hwq-DRY	P37231
CCCc1c(=O)[nH]c2ccc(Cl)cc2c1OC1CCCCC1	1tkt-H12	P04585
CC(C)c1c(=O)[nH]c2ccc(Cl)cc2c1OC1CCCCC1	1tl3-H20	P04585
CCCc1c(=O)[nH]c2ccc(Cl)cc2c1SC1CCCCC1	1tkz-H16	P04585
CCCc1c(=O)[nH]c2ccc(Cl)cc2c1S(=O)C1CCCCC1	1tl1-H18	P04585
CCCC1(C)SC(=[NH+]C2CCCCCCC2)NC1=O	3byz-H11	P28845
CC(C)c1nc2nc(N)nc(N)c2nc1C(C)C	3jq6-DX1	Q581W1
CCCc1nc(C)c2c(C)nc3ccc(OC)nc3n12	3lxg-Z73	Q9QYJ6
CC(C)c1nc(CN(C)C(=O)NC(C(=O)NC(Cc2ccccc2)CC(O)C(Cc2ccccc2)NC(=O)OCc2cncs2)C(C)C)cs1	1hxw-RIT	P12499
CC(C)c1nc(CN(C)C(=O)NC(C(=O)NC(Cc2ccccc2)CC(O)C(Cc2ccccc2)NC(=O)OCc2cncs2)C(C)C)cs1	1rl8-RIT	P03367
CC(C)c1nc(N(C)S(C)(=O)=O)nc(-c2ccc(F)cc2)c1CCC(O)CC(O)CC(=O)[O-]	1hwl-FBI	P04035
CC(C)c1n[nH]cc1-c1ccnc(NC2CC[NH+](C)CC2)n1	3nup-3NU	Q00534
CC(C)c1n[nH]c(Cl)c1-c1ccnc(Nc2ccc(N3CC[NH2+]CC3)cn2)n1	3nux-3NV	Q00534
CC#CC1(O)CCC2C3CCC4=CC(=O)CCC4=C3C(c3ccc(N(C)C)cc3)CC21C	1nhz-486	P04150
CCCCc1c2nccnc2[nH]c1-c1ccc(O)cc1	1ung-ALH	Q00535
CC(C)(C)c1cc2c(cc1Cl)C=C(C(=O)[O-])C(C(F)(F)F)O2	3mqe-416	Q05769
CCC(=C(c1ccccc1)c1ccc(C=CC(=O)[O-])cc1)c1ccccc1	1r5k-GW5	P03372
CCC(Cc1ccccc1)c1cc(O)c(C(c2cccc(NC(=O)CCNC(=O)OC(C)(C)C)c2)C2CC2)c(=O)o1	2upj-U02	P03367
CC(C=CC1=C(C)CCCC1(C)C)=CC=CC(C)=CC(=O)[O-]	1tyr-REA	P02766
CC(C)Cc1ccc(C(C)C(=O)[O-])cc1	2pws-IBP	P59071
CC(C)Cc1ccc(C(C)C(=O)[O-])cc1	3p6g-IZP	P15090
CCC(CC1CCCC(CNC(=O)C2CCC(C34CC5CC(CC(C5)C3)C4)CC2)C1)C(=O)[O-]	2zno-S44	P37231
CC(CCc1ccc(C(N)=O)cc1)[NH2+]CC(=O)c1ccc(F)cc1	2ogz-U1N	P27487
CCC(=C(c1ccc(O)cc1)c1ccc(OCC[NH+](C)C)cc1)c1ccccc1	3ert-OHT	P03372
CC(CCc1ccc(O)cc1)NC(=O)Cc1c2ccccc2[nH]c1-c1ccccc1	2iok-IOK	P03372
CC(C)(C)c1cc(O)ccc1O	3eyk-EYK	P26137
CC(C)CC1CCOCCP([O-])(O)NC(CC(C)C)C(=O)N1	1pe8-BR5_LEU_LEN	P00800
CCC(Cc1c(I)cc(I)c(O)c1I)C(=O)[O-]	2ydf-IO3	P02768
CC(C)CC1(C)[NH+]=C([NH3+])N(Cc2ccc(CNC(=O)Nc3ccc(C#N)cc3)cc2)C1=O	3l5c-BDQ	P56817
CC(C)(C)C1C(=O)C(=C2[N-]S(=O)(=O)c3c2cccc3CNS(C)(=O)=O)C(=O)N1Cc1ccc(F)cc1	3h5u-H5U	P26663
CCCCC1C(=O)N(c2ccccc2)N(c2ccccc2)C1=O	2w98-P1Z	Q8N8N7
CCCCc1nc2ccc(O)cc2c(=O)n1Cc1ccc(-c2ccccc2-c2nnn[nH]2)cc1	1a8t-061	P25910
CC(C)(C)c1nc2c([nH]1)c1cc[nH]c(=O)c1c1cc(F)ccc21	3lxp-IZA	P29597
CCC(C)C1NC(=O)C(NC(=O)C2Cc3ccc(cc3)OCCCCC(=O)NC(C(C)C)C(=O)N2)Cc2ccc(cc2)OCCCNC1=O	3bxr-DRR	P03369
CCC(C)C1NC(=O)C([NH2+]CC(O)C(Cc2ccc(O)cc2)NC(=O)C(C(C)C)N2CCCC2=O)Cc2ccc(cc2)OCCCNC1=O	1b6k-PI5	P03369
CC(C=CC1(O)C(C)=CC(=O)CC1(C)C)=CC(=O)[O-]	3jrq-A8S	P49597
CC(C=CC1(O)C(C)=CC(=O)CC1(C)C)=CC(=O)[O-]	3kb0-A8S	O80992
CC(C=CC1(O)C(C)=CC(=O)CC1(C)C)=CC(=O)[O-]	3kdi-A8S	O80992
CC(C=CC1(O)C(C)=CC(=O)CC1(C)C)=CC(=O)[O-]	3kdj-A8S	Q8VZS8
CC(C=CC1(O)C(C)=CC(=O)CC1(C)C)=CC(=O)[O-]	3qn1-A8S	O49686
CC(C)(C)c1onc(OCP([O-])(O)O)c1CC([NH3+])C(=O)[O-]	1n0t-AT1	P19491
CCC(CC)(c1ccc(OCC(O)CO)c(C)c1)c1ccc(OCC(O)C(C)(C)C)c(C)c1	2zfx-YR3	P13053
CC(C)CCC1(C)CN(C2CCCC2)C(=O)C(=C2[N-]S(=O)(=O)c3cc(NS(C)(=O)=O)ccc3N2)C1=O	3gyn-B42	P26663
CC(C)C(Cc1cn(Cc2ccc(C(=O)[O-])cc2)nn1)C(=O)NC(CCCC[NH3+])C(=O)[O-]	3fxp-D38	P00800
CCCCC#Cc1ccc(C(=O)NNC(=S)NC)o1	3gk1-32A	P02638
CCCCCCc1ccc(Oc2ccccc2C)c(O)c1	2x23-TCU	P0A5Y6
CCCCC(=Cc1coc2nc(N)nc(N)c12)c1ccccc1OC	3nxv-D2F	P00374
CC(C)CCCC(C)C1CCC2C3CC=C4CC(O)CCC4(C)C3CCC12C	2zxe-CLR	Q4H132
CC(C)CCCC(C)C1CCC2C3CC=C4CC(OS([O-])(O)O)CCC4(C)C3CCC12C	2hka-C3S	P79345
CCCCCCCCc1ccc(Oc2ccccc2)c(O)c1	2b37-8PS	P0A5Y6
CCCCCCC(C)(C)c1cc(O)c2c(c1)OC(C)(C)C1CC=C(C(=O)[O-])CC21	2om9-AJA	P37231
CC(C)=CCCC(C)=CCCC(C)=CCCC(C)=CCOP([O-])(O)OP([O-])(O)O	2j1p-GRG	Q43133
CCCCCC=CCC(CC=CCCCCC)(P([O-])([O-])O)P([O-])(O)O	2z4z-SC0	Q12051
CC(C)=CCCC(C)=CCCC(C)=CC(O)P([O-])(O)O	1hxa-FHP	Q40577
CC(C)=CCCC(C)=CCCC(C)=CCOP([O-])(O)OP([O-])(O)O	1v7u-FPP	P60472
CC(C)=CCCC(C)=CCCC(C)=CCOP([O-])(O)OP([O-])(O)O	2vg1-FPP	O53434
CC(C)=CCCC(C)=CCCC(C)=CCOP([O-])(O)OP([O-])(O)O	3bnx-FPP	Q9UR08
CC(C)=CCCC(C)=CCCC(C)=C(F)COP([O-])(O)OP([O-])(O)O	3bny-FPF	Q9UR08
CCCCCCCCCCOC1OC(CO)C(OC2OC(CO)C(O)C(O)C2O)C(O)C1O	2hd0-DMU	P27958
CCCCCCCCCCOCC(COCC(F)(F)F)OP([O-])(O)OC	1fdk-GLE	P00593
CCCCCCCCCC(=O)NC1CCOC1=O	3qp4-HL0	D3W065
CCCCCCCCCC(=O)NC1CCOC1=O	3qp8-HL0	Q7NQP7
CCCCCCCCCCOP([O-])(O)OCC[N+](C)(C)C	3ff5-DPW	Q642G4
CC(C)=CCCC(C)=CCOP([O-])(O)OP([O-])(O)O	2vg3-GPP	P60479
CC(C)=CCCC(C)=CCOP([O-])(O)OP([O-])(O)O	3ern-GPP	P62617
CC(C)=CCCC(C)=CCOP([O-])(O)OP([O-])(O)O	3krp-GPP	Q9SBR3
CCCCCCCCC[NH+]1CC(O)C(O)C(O)C1CO	2v3e-NND	P04062
CCCCCCCCCOC1OC(CO)C(O)C(O)C1O	1hzx-BNG	P02699
CCCCCCCCNC(=S)N1C2COC1C(O)C(O)C2O	2vrj-NCW	Q08638
CCCCCCCC[NH+]=C1OCC2C(O)C(O)C(O)C(O)N12	2wbg-LGS	Q08638
CCCCCCCC[NH+]=C1OCC2C(O)C(O)C(O)C(O)N12	2wc3-AM3	Q08638
CCCCCCCC[NH+]=C1SCC2C(O)C(O)C(O)C(O)N12	2wc4-AMF	Q08638
CC(CCCC(C)(C)O)C1CCC2C(=CC=C3CC(O)C(C)C(O)C3)CCCC21C	1rkh-VD2	P13053
CCCC(CCC)C(=O)NC1Cc2ccc(S(N)(=O)=O)cc2C1	2qo8-3CC	P00918
CCCCCCCC(=O)NC1CCOC1=O	3qp2-HTF	D3W065
CCCCCCCC(=O)OCC1OC(CO)(OC2OC(CO)C(O)C(O)C2O)C(O)C1O	1pyy-OSU	P59676
CC(C)CC(CC(=O)NO)C(=O)NC(Cc1ccc2ccccc2c1)C(=O)NC(C)C(N)=O	3kds-NHX	Q9WZ49
CC(C)CC(CC(=O)NO)C(=O)NC(C(=O)NC(C)C(=O)NCC[NH3+])C(C)(C)C	1bkc-INN	P78536
CCCCCCC(=O)OCC(COP([O-])(O)O)OC(=O)CCCCCC	2ze9-PD7	Q53728
CCCCCCCSC1OC(CO)C(O)C(O)C1O	2bgi-HTG	Q9L6V3
CCCCCCCSC1OC(CO)C(O)C(O)C1O	2hpy-HTG	P02699
CCCCCCCSC1OC(CO)C(O)C(O)C1O	2vnj-HTG	Q9L6V3
CCCCCCCSC1OC(CO)C(O)C(O)C1O	3oax-HTG	P02699
CC(C)(C)CCN1C([O-])=C(C2=Nc3ccc(NS(C)(=O)=O)cc3S(=O)(=O)N2)C(=O)C2CCCN21	3cvk-N34	P26663
CC(C)CCC(O)C(C)C1CCC2C3CC=C4CC(O)CCC4(C)C3CCC12C	3mzs-HC9	P00189
CCCCCC(O)C=CC1C=CC(=O)C1CCCCCCC(=O)[O-]	2g5w-8PG	Q9FUP0
CCCCCC(O)C=CC1C(=O)CC(O)C1CC=CCCCC(=O)[O-]	1ry0-PG2	P42330
CCC(C)(C)C(=O)C(=O)N1CCCCC1C(=O)OC(CCc1ccccc1)c1ccccc1	1fkg-SB3	P62942
CCC(C)(C)C(=O)C(=O)N1CCCCC1C(=O)OC(CCc1ccccc1)C1CCCCC1	1fkh-SBX	P62942
CC(C)CCC(=O)N1CCCC1C(=O)NCc1ccc(C(=[NH2+])[NH3+])cc1	2ziq-26U	P00734
CC(C)CC(C(=O)NC1CCCCCCCCCCNC1=O)C(O)C(=O)NO	1kbc-HLE_RIN	P22894
CCCCCC(=O)NC1CCOC1=O	3qp1-HL6	D3W065
CCCCCC(=O)NC1CCOC1=O	3qp6-HL6	Q7NQP7
CCC(C)(C)C(=O)OC1CC(C)C=C2C=CC(C)C(CCC(O)CC(O)CC(=O)[O-])C21	1hw9-SIM	P04035
CCCCCC(=O)OCC(O)COP([O-])(O)O	3e3c-HHG	O85638
CCCCCCSCC(NC(=O)CCC([NH3+])C(=O)[O-])C(=O)NCC(=O)[O-]	1bh5-GTX	Q04760
CCCCCCSCC(NC(=O)CCC([NH3+])C(=O)[O-])C(=O)NCC(=O)[O-]	1gnw-GTX	P46422
CCCCCCSCC(NC(=O)CCC([NH3+])C(=O)[O-])C(=O)NCC(=O)[O-]	1m9a-GTX	P08515
CCCCCCSCC(NC(=O)CCC([NH3+])C(=O)[O-])C(=O)NCC(=O)[O-]	1q4j-GTX	Q8MU52
CCCCCCSCC(NC(=O)CCC([NH3+])C(=O)[O-])C(=O)NCC(=O)[O-]	1tu8-GTX	P46427
CC(C)(CCl)C(=O)Nc1ccc(C(F)(F)F)cc1	2i80-G1L	Q5HEB7
CC(C)CCN1c2ccccc2C(=O)C(C2Nc3ccc(OCC(N)=O)cc3S(=O)(=O)N2)C1=O	3hhk-77Z	Q99AU2
CC(C)CCn1c2nccn2c(=O)c(=C2[N-]S(=O)(=O)c3cc(NS(C)(=O)=O)ccc3N2)c1=O	3h98-B5P	P26663
CC(C)CCn1c(=O)c(C2=Nc3ccc(NS(C)(=O)=O)cc3S(=O)(=O)N2)c(O)c2cccn21	3co9-3MS	P26663
CC(C)CCn1nc(-c2cccs2)c(O)c(C2=Nc3ccc(NS(C)(=O)=O)cc3S(=O)(=O)C2)c1=O	3cwj-321	Q99AU2
CC(C)CCn1nc(-c2cccs2)c(O)c(C2=Nc3ccc(NS(C)(=O)=O)cc3S(=O)(=O)N2)c1=O	3cde-N3H	P26663
CC(C)CCn1nc(-c2cccs2)c(O)c(C2=Nc3ccc(OC(C)C(N)=O)cc3S(=O)(=O)N2)c1=O	3br9-DEY	P26663
CC(C)CCn1nc(-c2cncs2)c(O)c(C2=Nc3ccc(OCC(N)=O)cc3S(=O)(=O)N2)c1=O	3bsa-1PD	P26663
CC(C)CCn1nc(N2CCCC2)c([O-])c(C2=Nc3ccc(NS(C)(=O)=O)cc3S(=O)(=O)N2)c1=O	3e51-N35	P26663
CC(C)=CCN(CC[NH3+])S(=O)(=O)c1ccc(C(N)=O)cc1	2zga-YDP	P03367
CC(C)CCN(CC(O)C1Cc2ccc(cc2)OCCCCCC(=O)NC(C(C)C)C(=O)N1)S(=O)(=O)c1ccc(N)cc1	1d4l-PI9	P03369
CC(C)CCN(CC(O)C1Cc2ccc(cc2)OCCCC(=O)NC(C(C)C)C(=O)N1)S(=O)(=O)c1ccccc1	1z1h-HBB	P03369
CC(C)CCN(CC(O)C1Cc2ccc(cc2)OCCCC(=O)NC(CC(N)=O)C(=O)N1)S(=O)(=O)c1ccccc1	1z1r-HBH	P03369
CCC(C)CN(CC(O)C(Cc1ccccc1)NC(=O)c1cccc(O)c1)S(=O)(=O)c1ccc2ncsc2c1	2qi4-MZ6	O38732
CCCCCN(CC(O)C(Cc1ccccc1)NC(=O)C(NC(C)=O)C(C)C)S(=O)(=O)c1ccc2ncsc2c1	2qi5-MZ7	O38732
CCC(C)CN(CC(O)C(Cc1ccccc1)NC(=O)C(O)C(C)C)S(=O)(=O)c1ccc2ncsc2c1	2qi3-MZ5	O38732
CC(C)CC(NC(=O)C1CCCN1C(=O)C(NC(=O)C(CCCC[NH3+])NC(=O)CNC(=O)C([NH3+])C(=O)[O-])C(C)C)C([O-])[O-]	2zgh-SER_GLY_LYS_VAL_PRO_LEU	P51124
CCC(C)C(NC(=O)C1CCC[NH+]1CC(O)C1Cc2ccc(cc2)OCCCC(=O)NC(CC(N)=O)C(=O)N1)C(=O)NC(C(N)=O)C(C)C	1b6j-PI1	P03369
CC(C)CC(NC(=O)c1ccc([N+](=O)[O-])cc1)C(=O)N1CCCC1C(=O)NCCCC[NH+]=C([NH3+])[NH3+]	1ypm-RA4	P00734
CC(C)CC(NC(=O)c1ccco1)C(=O)NC(Cc1c[nH]c2ccccc12)C(=O)[O-]	3dsl-FLE_TRP	O93523
CC(C)CC(NC(=O)c1ccco1)C(=O)NC(Cc1c[nH]c2ccccc12)P([O-])(O)O	4aig-FLX	P34179
CCCCCNC(=O)C(Cc1ccc(N(C(=O)C(=O)[O-])c2ccccc2C(=O)[O-])c2ccccc12)NC(C)=O	1nl9-989	P18031
CCCCCNC(=O)C(Cc1ccc(N(C(=O)C(=O)[O-])c2ccccc2C(=O)[O-])c(C=CC(N)=O)c1)NS(C)(=O)=O	1ony-588	P18031
CCCCCNC(=O)C(Cc1ccc(OCC(=O)[O-])c(C(=O)[O-])c1)NC(=O)C(Cc1ccccc1)NC(=O)CCC(=O)[O-]	1g7g-INX	P18031
CCCCCNC(=O)C(Cc1ccc(OC(C(=O)[O-])C(=O)[O-])cc1)NC(=O)NC(Cc1ccccc1)C(=O)[O-]	1g7f-INZ	P18031
CC(C)CC(NC(=O)C(CCCC[NH3+])NC(=O)C(CCCC[NH3+])NC(=O)C(C)[NH3+])C(=O)[O-]	3qhw-ALA_LYS_LYS_LEU	P24941
CCC(C)C(NC(=O)C(CCC(N)=O)NC(=O)C([NH3+])CCSC)C(=O)[O-]	3ofi-MET_GLN_ILE	P14735
CC(C)CC(NC(=O)C(CC(N)=O)NC(=O)C(NC(=O)C(CCC(=O)[O-])NC(=O)C([NH3+])CC(=O)[O-])C(C)O)C(=O)[O-]	3qjm-ASP_GLU_THR_ASN_LEU	Q9WV48
CC(C)CC(NC(=O)C(CC(=O)[O-])NC(=O)C([NH3+])CC(=O)[O-])C(=O)NC(Cc1ccc(O)cc1)C(=O)NCC(=O)[O-]	2hpl-ASP_ASP_LEU_TYR_GLY	Q9JI78
CC(C)CC(NC(=O)C(C)NC(=O)C(CC(C)C)NC(=O)C(C)[NH3+])C(=O)[O-]	1sua-ALA_LEU_ALA_LEU	P00782
CC(C)CC(NC(=O)C(C)NC(=O)C[NH3+])C(=O)NC(C)C(=O)NCC(=O)[O-]	2pq2-GLY_ALA_LEU_ALA_GLY	P06873
CC(C)CC(NC(=O)C(C)[NH2+]C(=O)CCC(=O)[O-])C(=O)N1CCCC1C(=O)NC(C)C(=O)Nc1ccc([N+](=O)[O-])cc1	3luo-SIN_ALA_LEU_PRO_ALA_NIT	Q5SLE7
CCC(C)C(NC(=O)C(C)[NH3+])C(=O)NC(CCC(=O)[O-])C(=O)NC(C(=O)[O-])C(C)O	3h11-ALA_ILE_GLU_THR_ASA	O15519
CC(C)CC(NC(=O)C(C)NP([O-])(O)CNC(=O)OCc1ccccc1)C(=O)[O-]	3fvp-UB2	P00800
CCC(C)C(NC(=O)C(CO)NC(=O)C(Cc1ccccc1)NC(=O)C([NH3+])CC(=O)[O-])C(=O)[O-]	2q3c-ASP_PHE_SER_ILE	P0A534
CCC(C)C(NC(=O)C(NC(=O)C([NH3+])C(C)O)C(C)O)C(=O)N1CCCC1C(=O)NC(CCSC)C(=O)NC(CC([O-])[O-])C(=O)[O-]	3eg9-THR_THR_ILE_PRO_MET_ASP	Q15436
CC(C)CC(NC(=O)C([NH3+])Cc1ccccc1)C(=O)NC(CCC(=O)[O-])C(=O)NC(CCCC[NH3+])C(=O)[O-]	1yti-PHE_LEU_GLU_LYS	P05896
CCC(C)C(NC(=O)C([NH3+])C(C)O)C(=O)NC(C(=O)NC(CO)C(=O)[O-])C(C)O	1j71-THR_ILE_THR_SER	Q00663
CCC(C)C(NC(=O)C([NH3+])CC(=O)[O-])C(=O)N1CCCC1C(=O)NC(Cc1ccccc1)C(=O)[O-]	3c94-ASP_ILE_PRO_PHE	P04995
CC(C)CC(NC(=O)C([NH3+])CC(=O)[O-])C(=O)NC(Cc1ccc(O)cc1)C(=O)NCC(=O)[O-]	3ebb-ASP_LEU_TYR_GLY	Q9Y263
CC(C)CC(NC(=O)C(NP([O-])(O)CNC(=O)OCc1ccccc1)C(C)C)C(=O)[O-]	3flf-UB3	P00800
CC(C)CC(NC(=O)C(O)C([NH3+])Cc1ccccc1)C(=O)[O-]	3m50-EBT	P93343
CC(C)=CC[NH+]1Cc2cc(Cl)cc3[nH]c(=S)n(c32)CC1C	1rev-TB9	P04585
CC(C)CC([NH2+]C(CCc1ccccc1)C(=O)[O-])C(=O)NC(Cc1c[nH]c2ccccc12)C(=O)[O-]	1tmn-CLT_LEU_TRP	P00800
CC(C)CC([NH3+])C(=O)N1CCCC1C(=O)NCc1cccc(Cl)c1	2zgb-21U	P00734
CC(C)CC([NH3+])C(=O)N1CCCC1C(=O)NCc1ccc(C(=[NH2+])[NH3+])cc1	2znk-31U	P00734
CCC(C)C([NH3+])C(=O)N1CCCC1C(=O)NC(Cc1ccccc1)C(=O)[O-]	3q8d-ILE_PRO_PHE	D5CXR1
CC(C)CC([NH3+])C(=O)N1CCCC1C(=O)NC(CCC(=O)[O-])C(=O)NC(C(=O)NCC(=O)[O-])C(C)O	1t2w-LEU_PRO_GLU_THR_GLY	Q9S446
CCC(C)C([NH3+])C(=O)N1CCCC1C(=O)NC(C(=O)[O-])C(C)CC	1wcy-ILE_PRO_ILE	P27487
CC(C)CC([NH3+])C(=O)NC(Cc1ccccc1)C(=O)NCc1ccc(F)cc1	1afq-DLE_PHE_FBA	P00766
CCC(C)C([NH3+])C(=O)NC(Cc1ccccc1)C(=O)NCC(=O)[O-]	3lae-ILE_PHE_GLY	Q57017
CCC(C)C([NH3+])C(=O)NC(Cc1ccc(O)cc1)C(=O)[O-]	2whz-ILE_TYR	P00800
CC(C)CC([NH3+])C(=O)NC(Cc1c[nH]c2ccccc12)C(=O)[O-]	2wi0-LEU_TRP	P00800
CCC(C)C([NH3+])C(=O)NC(C)C(=O)N1CCCC1C(=O)N1CCCC1C(=O)N1CCCC1C(=O)NCC(=O)NC(CC(C)C)C(=O)[O-]	3fma-ILE_ALA_PRO_PRO_PRO_GLY_LEU	P32909
CC(C)CC([NH3+])C(=O)NC(CC(=O)[O-])C(=O)N1CCCC1C(=O)NC(CCCNC(N)=[NH2+])C(=O)[O-]	1nrs-LEU_ASP_PRO_ARG	P00734
CCC(C)C([NH3+])C(=O)NC(COP([O-])(O)O)C(=O)NC(CC(C)C)C(=O)N1CCCC1C(=O)[O-]	2c63-ILE_SEP_LEU_PRO	Q04917
CCC(C)C([NH3+])C(=O)NS(=O)(=O)NCC1OC(n2cnc3c2ncnc3N)C(O)C1O	1jzq-ILA	P56690
CC(C)CC([NH3+])P([O-])(O)CC(C)C(=O)[O-]	3neh-L3A	Q71WW4
CC(C)CC(NP([O-])(O)OC1OC(C)C(O)C(O)C1O)C(=O)NC(Cc1c[nH]c2ccccc12)C(=O)[O-]	1tlp-LEU_TRP_RHA	P00800
CC(C)CC(NS(=O)(=O)c1ccc(-c2ccccc2)cc1)C(=O)[O-]	3ehx-BDL	P39900
CC(C)CC(NS(=O)(=O)Cc1ccccc1)C(=O)N1CCCC1C(=O)NCCCC[NH+]=C([NH3+])[NH3+]	1ypl-RA8	P00734
CCC(C)C(NS(=O)(=O)Cc1ccccc1)C(=O)NC(CCC(N)=O)C(=O)NCc1ccc(C(N)=[NH2+])cc1	2zp0-PI0	P08709
CCCCCOc1ccc2cc(S(=O)(=O)NC(CCC(=O)[O-])C(=O)[O-])ccc2c1	2uuo-LK3	P14900
C=C(CC)C(=O)c1ccc(OCC(=O)[O-])c(Cl)c1Cl	3n9j-EAA	P09211
CC(C)=CCOc1cc(NC(=S)c2ccoc2C)ccc1Cl	1s1t-UC1	P04585
CCC(CC(=O)NC1C2CC3CC(C2)CC1C3)n1c(N)nc2cc(Cl)ccc21	3s2o-EV6	P56817
CC(C)C(CO)Nc1nc2c(ncn2C(C)C)c(Nc2cccc(Cl)c2)n1	2izu-P01	Q9Y6M4
CC(C)CC(=O)Nc1n[nH]c2c1CN(C(=O)C1CC[NH+](C)CC1)C2(C)C	2wpa-889	P24941
CCC(CC(=O)NCC1CCCCC1)n1c(N)nc2cc(Cl)ccc21	3msl-EV5	P56817
CC(C)C(C(=O)NC(Cc1ccccc1)CC(O)C(Cc1ccccc1)NC(=O)C1CN(c2ccccc2)C(=O)O1)N1CCCNC1=O	2q55-MU0	O38732
CC(C)CC(=O)NC(Cc1ccc(I)cc1)C(=O)NC(C=O)Cc1ccc(O)cc1	1nlu-IVA_PHI_TYB	P42790
CC(CCC(=O)[O-])C1CCC2C3C(O)CC4CC(O)CCC4(C)C3CCC12C	1ihi-IU5	P52895
CC(CCC(=O)[O-])C1CCC2C3C(O)CC4CC(O)CCC4(C)C3CC(O)C12C	1hrk-CHD	P22830
CC(CCC(=O)[O-])C1CCC2C3C(O)CC4CC(O)CCC4(C)C3CC(O)C12C	2qo4-CHD	Q9I8L5
CC(CCC(=O)[O-])C1CCC2C3C(O)CC4CC(O)CCC4(C)C3CC(O)C12C	3hcn-CHD	P22830
CC=C(C)C(=O)OC1C(C)=C2C3OC(=O)C(C)(O)C3(O)C(OC(=O)CCC)CC(C)(OC(C)=O)C2C1OC(=O)CCCCCCC	3n5k-TG1	P04191
CCC(C)C(=O)OC1CCC=C2C=CC(C)C(CCC(O)CC(O)CC(=O)[O-])C21	1hw8-114	P04035
CCC(C)C(=O)OC1CC(C)C=C2C=CC(C)C(CCC(O)CC(O)CC(=O)[O-])C21	1t02-LVA	P13702
CCCC(C(=O)[O-])c1c(C)nc2ccc(Cl)cc2c1-c1ccccc1	3lpu-976	Q76353
CC(C)(C)C(=O)OCC(C)(C)C(O)C(=O)NCCC(=O)NCCO	2vu1-OPI	P07097
CC(C)(C)C(=O)OCC(C)(C)C(O)C(=O)NCCC(=O)NCCS	2vu2-PN5	P07097
CCCCC(=O)OCC(COP([O-])(O)O)OC=O	2nr9-PA6	P44783
C=C(C)CCOP([O-])(O)OP([O-])(O)O	3p41-IPE	Q4K5A6
C=C(C)CCOP([O-])(O)OP([O-])(O)O	3q2q-IPE	Q8NT37
CCCCC(Sc1nc2ccccc2c(=O)n1-c1cccc(Cl)c1)C(=O)N1CCCC2(CCC[NH2+]C2)C1	3f9n-38M	O14757
CC(C)Cn1c2[nH]cnc2c(=O)n(C)c1=O	2hd1-IBM	O76083
CC(C)Cn1c2[nH]cnc2c(=O)n(C)c1=O	3itu-IBM	O00408
CC(C)Cn1c2[nH]cnc2c(=O)n(C)c1=O	3jwr-IBM	O76074
CC(C)Cn1c2[nH]cnc2c(=O)n(C)c1=O	3qi4-IBM	O76083
CC(C)Cn1c2nn(Cc3cccc4ccccc43)c(-c3ccncc3)c2c(=O)n(C)c1=O	2jfz-003	Q9ZLT0
CC#CCn1c(N2CCCC([NH3+])C2)nc2c1c(=O)n(Cc1nc(C)c3ccccc3n1)c(=O)n2C	2rgu-356	P27487
CC(C)(C)n1nc(-c2ccc3ccccc3c2)c2c1ncnc2N	3i7c-BK2	Q9BJF5
CC(C)(C)n1nc(-c2ccc(Cl)cc2Cl)c(C(=O)c2ccc(S(C)(=O)=O)cc2Cl)c1O	1tg5-645	P93836
CC(C)(C)n1nc(Cc2cccc(Br)c2)c2c1ncnc2N	3ma6-DXR	Q9BJF5
CC(C)(C)n1[nH+]c(-c2ccc(Cl)cc2)c2c1ncnc2N	2zv9-PP2	P25911
CC(C)(C)n1[nH+]c(-c2ccc(Cl)cc2)c2c1ncnc2N	3geq-PP2	P00523
CC(=CCNc1ncnc2[nH]cnc21)CO	2qim-ZEA	Q9LLQ2
CC(C)(C)Nc1nc(N)c(C(=O)c2ccccc2)s1	2wms-ZYS	O14757
CCCCN(CCCC)C(=O)n1cc(C(=O)NC(Cc2ccccc2)C(O)C[NH2+]Cc2cccc(OC)c2)c2ccccc21	3ohf-3HF	P56817
CC(C)CN(CC[NH2+]CCN(CC(C)C)S(=O)(=O)c1ccc(N)cc1)S(=O)(=O)c1ccc(N)cc1	3bgb-LJG	P03367
CC(C)CN(CC(O)C(Cc1ccccc1)NC(=O)c1cccc(O)c1)S(=O)(=O)c1ccc2ncsc2c1	2qi6-MZ8	O38732
CC(C)CN(CC(O)C(Cc1ccccc1)NC(=O)C1CN(c2ccccc2C(F)(F)F)C(=O)O1)S(=O)(=O)c1ccc2ncsc2c1	3mxe-K54	P03369
CC(C)CN(CC(O)C(Cc1ccccc1)NC(=O)C1CN(c2ccccc2O)C(=O)O1)S(=O)(=O)c1ccc2c(c1)OCO2	3mxd-K53	P03369
CC(C)CN(CC(O)C(Cc1ccccc1)NC(=O)OC1CCOC1)S(=O)(=O)c1ccc(N)cc1	1hpv-478	P04587
CC(C)CN(CC(O)C(Cc1ccccc1)NC(=O)OC1CCOC1)S(=O)(=O)c1ccc(N)cc1	1t7j-478	P35963
CC(C)CN(CC(O)C(Cc1ccccc1)NC(=O)OC1CCOC1)S(=O)(=O)c1ccc(N)cc1	3ekv-478	P03369
CC(C)CN(CC(O)C(Cc1ccccc1)NC(=O)OC1CCOC1)S(=O)(=O)c1ccc(N)cc1	3nu3-478	P03366
CC(C)CN(CC(O)C(Cc1ccccc1)NC(=O)OC1COC2OCCC12)S(=O)(=O)c1ccc2c(c1)OCO2	2qd7-065	P03367
CC(C)CN(CC(O)C(Cc1ccccc1)NC(=O)OC1COC2OCCC12)S(=O)(=O)c1ccc(N)cc1	2hs1-017	P03366
CC(C)CN(CC(O)C(Cc1ccccc1)NC(=O)OC1COC2OCCC12)S(=O)(=O)c1ccc(N)cc1	3lzu-017	Q9QB59
CC(C)CN(CC(O)C(Cc1ccccc1)NC(=O)OC1COC2OCCC12)S(=O)(=O)c1ccc(N)cc1	3mws-017	Q673V0
CC(C)CN(CC(O)C(Cc1ccccc1)NC(=O)OC1COC2OCCC12)S(=O)(=O)c1ccc(N)cc1	3oy4-017	P03369
CCCCN(C)C(=O)CCCCCCCCCCC1Cc2cc(O)ccc2C2CCC3(C)C(O)CCC3C12	1hj1-AOE	Q62986
CC(C)(C)NC(=O)C1CC2CCCCC2C[NH+]1CC(O)C(Cc1ccccc1)NC(=O)C(CC(N)=O)NC(=O)c1ccc2ccccc2n1	1c6z-ROC	O09893
CC(C)(C)NC(=O)C1CC2CCCCC2C[NH+]1CC(O)C(Cc1ccccc1)NC(=O)C(CC(N)=O)NC(=O)c1ccc2ccccc2n1	1fb7-ROC	Q72874
CC(C)(C)NC(=O)C1CC2CCCCC2C[NH+]1CC(O)C(Cc1ccccc1)NC(=O)C(CC(N)=O)NC(=O)c1ccc2ccccc2n1	1hxb-QNC_DSG_HPH_DIQ_NTB	P04585
CC(C)(C)NC(=O)C1CC2CCCCC2C[NH+]1CC(O)C(Cc1ccccc1)NC(=O)C(CC(N)=O)NC(=O)c1ccc2ccccc2n1	2nmz-ROC	P04587
CC(C)(C)NC(=O)C1CC2CCCCC2C[NH+]1CC(O)C(Cc1ccccc1)NC(=O)C(CC(N)=O)NC(=O)c1ccc2ccccc2n1	3el4-ROC	P03369
CC(C)(C)NC(=O)C1CC2CCCCC2C[NH+]1CC(O)C(Cc1ccccc1)NC(=O)C(CC(N)=O)NC(=O)c1ccc2ccccc2n1	3k4v-ROC	P03366
CC(C)(C)NC(=O)C1CC2CCCCC2C[NH+]1CC(O)C(Cc1ccccc1)NC(=O)C(CC(N)=O)NC(=O)c1ccc2ccccc2n1	3n3i-ROC	P04585
CC(C)(C)NC(=O)C1CC2CCCCC2C[NH+]1CC(O)C(Cc1ccccc1)NC(=O)C(CC(N)=O)NC(=O)c1ccc2ccccc2n1	3oxc-ROC	Q7SSI0
CC(C)(C)NC(=O)C1CC2CCCCC2C[NH+]1CC(O)C(Cc1ccccc1)NC(=O)C(CC(N)=O)NC(=O)c1ccc2ccccc2n1	3pwr-ROC	P03367
CC(C)(C)NC(=O)C1CCC2C3CCC4NC(=O)C=CC4(C)C3CCC12C	3g1r-FIT	P51857
CC(C)C(NC(=O)c1ccc(CCc2c[nH]c3nc(N)[nH]c(=O)c23)cc1)C(=O)[O-]	1jut-LYD	P0A884
CCCCNC(=O)c1cccc(NC(=O)CCCCCNc2ncnc3[nH]cnc32)c1	3daj-FXG	P97477
CC(C)(C)NC(=O)C1CCCC[NH+]1CC(O)C1Cc2ccc(cc2)OCCCC(=O)NC(CC(N)=O)C(=O)N1	1b6l-PI4	P03369
CC(C)C(NC(=O)C1CCCN1C(=O)C(NC(=O)C1CCC[NH2+]1)C(C)O)C(=O)NC(Cc1ccc(O)cc1)C(=O)[O-]	2z3f-PRO_THR_PRO_VAL_TYR	O74515
CCC(CNC(=O)c1ccc(S(N)(=O)=O)cc1)c1ccc2[nH]ccc2c1	1if9-SBB	P00918
CCC(C)NC(=O)c1cc(N)cc(-c2cnc(NC(C)C)c(=O)n2CC(=O)NCc2ccc(C(=[NH2+])[NH3+])cc2C(=O)Nc2cc[nH+]cc2)c1	1z6j-PY3	P08709
CC(C)C(NC(=O)C(Cc1ccccc1)CC(O)C(Cc1ccccc1)NC(=O)OC(C)(C)C)c1ncc[nH]1	1sbg-IM1	P03366
CC(C)C(NC(=O)C(Cc1ccccc1)CC(O)C(Cc1ccccc1)NC(=O)OC(C)(C)C)c1ncc[nH]1	1tcx-IM1	P04587
CC(C)C(NC(=O)C(Cc1ccc(O)cc1)NC(=O)C(Cc1ccc(O)cc1)NC(=O)C(CCC(=O)[O-])NC(=O)C([NH3+])CC(N)=O)C(=O)[O-]	1w9o-ASN_GLU_TYR_TYR_VAL	O00560
CC(C)C(NC(=O)C(C)NC(=O)OCc1ccccc1)C(=O)NC(CO)Cc1ccccc1	2hah-INT	P16088
CC(C)C(NC(=O)C(C)NC(=O)OCc1ccccc1)C(=O)NC(CO)Cc1ccccc1	3tlh-INT	P03366
CC(C)C(NC(=O)C(CO)NC(=O)C([NH3+])CC(=O)[O-])C(=O)NC(Cc1ccccc1)C(=O)[O-]	1obx-ASP_SER_VAL_PHE	O00560
CC(C)C(NC(=O)CNC(=O)C1CCC[NH2+]1)C(=O)NC(Cc1ccc(O)cc1)C(=O)[O-]	1gha-PRO_GLY_VAL_TYR	P00766
CC(C)C(NC(=O)CNC(=O)CC1C=CCN2C(=O)CCCC(=O)N12)C(=O)NC(CCCNC(N)=[NH2+])C(=O)[O-]	3hat-RNG_GLY_VAL_ARG	P00734
CC(C)C(NC(=O)C([NH3+])CCCNC(N)=[NH2+])C(=O)[O-]	3lum-ARG_VAL	Q8TL28
CC(C)C(NC(=O)N(C)Cc1ccccn1)C(=O)NC(Cc1ccccc1)CC(O)C(Cc1ccccc1)NC(=O)C(NC(=O)N(C)Cc1ccccn1)C(C)C	1hvj-A78	P04587
CC(C)C(NC(=O)OCc1ccccc1)C(=O)NC(C)C(=O)NC(CCC[NH+]=C([NH3+])[NH3+])C(=O)NC(CO)C(=O)[O-]	3g8f-0PN	P59071
CC(C)(C)[NH2+]CC(O)COc1cccc2c1CC(C#N)=N2	2vt4-P32	P07700
CC(C)(C)[NH2+]CC(O)COc1nsnc1N1CCOCC1	3d4s-TIM	P07550
CC(C)C([NH3+])C(=O)NC(Cc1ccc(O)cc1)C(=O)NC(Cc1ccc(O)cc1)C(=O)NC(Cc1ccccc1)C(=O)[O-]	3gds-VAL_TYR_TYR_PHE	P0AEE3
CC(C)C([NH3+])C(=O)NC(Cc1ccc(O)cc1)C(=O)NC(Cc1c[nH]c2ccccc12)C(=O)NC(Cc1ccccc1)C(=O)[O-]	2r3y-VAL_TYR_TRP_PHE	P0AEE3
CC(C)C([NH3+])C(=O)NC(Cc1ccc(O)cc1)C(=O)NC(CCC(N)=O)C(=O)NC(Cc1ccccc1)C(=O)[O-]	3gco-VAL_TYR_GLN_PHE	P0AEE3
CC(C)C([NH3+])C(=O)NC(Cc1c[nH]c2ccccc12)C(=O)[O-]	3tmn-VAL_TRP	P00800
CC(C)C([NH3+])C(=O)NC(CCCC[NH3+])C(=O)[O-]	3ls7-VAL_LYS	P00800
CCCCOc1ccc2cc(S(=O)(=O)NC(CCC([O-])[O-])C(=O)[O-])ccc2c1	2jff-LK2	P14900
CCCCOc1ccc2cc(S(=O)(=O)NC(CCC([O-])[O-])C([O-])[O-])ccc2c1	2jfh-LK1	P14900
CCCCOc1cc(CC2CNC(=O)N2)ccc1OC	3k4s-0MO	Q08499
CC(C)COc1cccc(-c2nc3cc(C(=[NH2+])[NH3+])ccc3[nH]2)c1O	1o2k-656	P00760
CC(C)COc1c(Cl)cc2c(c1Cl)OC(C(F)(F)F)C(C(=O)[O-])=C2	3ntg-D72	Q05769
CCCCOc1nc2c(ncn2Cc2c(F)cccc2F)c(NCC[NH+]2CCOCC2)n1	2vvt-I24	Q836J0
CC(C)(CO)C(O)C(=O)NCCC(=O)NC=CS	1mvn-PCO	Q9SWE5
CC(C)(CO)C(O)C(=O)NCCC(=O)NCCS	3nd7-PNY	Q831P9
CC(C)(C)OC(=O)NC(Cc1ccccc1)C(O)C[N+](C)(Cc1ccccc1)NC(=O)c1ccccc1	3aid-ARQ	P03369
CC(C)(C)OC(=O)NC(Cc1ccccc1)C(O)C[NH2+]CC(O)C(Cc1ccccc1)NC(=O)OC(C)(C)C	1odw-BOC_HPH_BOC_HPH_DMN	P04585
CC(C)(C)OC(=O)NC(Cc1ccccc1)C(O)C[NH2+]CC(O)C(Cc1ccccc1)NC(=O)OC(C)(C)C	1odx-BOC_HPH_BOC_HPH_DMN	P04587
CC(C)(C)OC(=O)NCC(=O)N1CCCC1COC(=O)Cc1cccc(Cl)c1	3egk-M18	P00734
CCC(C(=O)N1CCCCC1C(=O)OC(CCc1ccc(OC)c(OC)c1)c1cccc(OCC(=O)[O-])c1)c1cc(OC)c(OC)c(OC)c1	1bl4-AP1	P62942
CCC(CO)Nc1ccc2[nH]cc(-c3ccc(C(=O)[O-])cc3)[n+]2n1	3bqr-4RB	O43293
CCCC(=O)NC1CCOC1=O	3ojg-HL4	Q5KZU5
CCC(CO)Nc1nc2c(C(C)C)cnn2c(NCc2ccccc2)n1	3dog-NNN	P24941
CCC(CO)Nc1nc2c(C(C)C)n[nH]c2c(NCc2ccccc2)n1	3pj8-404	P24941
CCC(CO)Nc1nc2c(ncn2C(C)C)c(NCc2ccc(-c3ccccn3)cc2)n1	3ddp-RC8	P24941
CCC(CO)Nc1nc2c(ncn2C(C)C)c(NCc2ccc(-c3ccccn3)cc2)n1	3lq5-SLQ	P50750
CCC(CO)Nc1nc2c(ncn2C(C)C)c(NCc2ccccc2)n1	3ddq-RRC	P24941
CCC(CO)Nc1nc2c(ncn2C(C)C)c(NCc2ccccc2O)n1	2a0c-CK9	P24941
CCCC(=O)Nc1n[nH]c2c1cc(-c1ccccc1)c(F)c2F	3lfq-A28	P24941
CCCC(=O)Nc1n[nH]c2cc(-c3ccc(O)cc3)c(-c3ccccc3)cc21	3lfn-A27	P24941
CCCC(=O)Nc1n[nH]c2cc(-c3ccc(O)cc3)ccc21	3lau-OFI	O14965
CCCC(=O)Nc1n[nH]c2cc(Cl)c(-c3ccccc3)cc21	3lfs-A07	P24941
CC(=CC(=O)NC(Cc1ccccc1)C(O)CN(Cc1cccs1)S(=O)(=O)c1cc(F)c(F)cc1F)C(F)(F)F	2qhz-MZ2	O38732
CC(=CC(=O)OCCCCCCCCC(=O)[O-])CC1OCC(CC2OC2C(C)C(C)O)C(O)C1O	1jzs-MRC	P56690
CC(C)(COP([O-])(O)O)C(O)C(=O)NCCC(=O)NCCS	1od6-PNS	Q5SJS9
CC(C)(COP([O-])(O)O)C(O)C(=O)NCCC(=O)NCCS	1vlh-PNS	Q9WZK0
CC(C)(COP([O-])(O)O)C(O)C(=O)NCCC(=O)NCCS	3nbk-PNS	P0A530
CC(C)(COP([O-])(O)OP([O-])(O)OCC1OC(n2cnc3c2ncnc3N)C(O)C1O)C(O)C(=O)NCCC(=O)NCCS	2grj-COD	Q9X1A7
CC(C)(COP([O-])(O)OP([O-])(O)OCC1OC(n2cnc3c2ncnc3N)C(O)C1OP([O-])(O)O)C(O)C(=O)NCCC(=O)NCCS	1bq6-COA	P30074
CC(C)(COP([O-])(O)OP([O-])(O)OCC1OC(n2cnc3c2ncnc3N)C(O)C1OP([O-])(O)O)C(O)C(=O)NCCC(=O)NCCS	1fy7-COA	Q08649
CC(C)(COP([O-])(O)OP([O-])(O)OCC1OC(n2cnc3c2ncnc3N)C(O)C1OP([O-])(O)O)C(O)C(=O)NCCC(=O)NCCS	1hnd-COA	P0A6R0
CC(C)(COP([O-])(O)OP([O-])(O)OCC1OC(n2cnc3c2ncnc3N)C(O)C1OP([O-])(O)O)C(O)C(=O)NCCC(=O)NCCS	1p0h-COA	O53831
CC(C)(COP([O-])(O)OP([O-])(O)OCC1OC(n2cnc3c2ncnc3N)C(O)C1OP([O-])(O)O)C(O)C(=O)NCCC(=O)NCCS	1qr0-COA	P39135
CC(C)(COP([O-])(O)OP([O-])(O)OCC1OC(n2cnc3c2ncnc3N)C(O)C1OP([O-])(O)O)C(O)C(=O)NCCC(=O)NCCS	1qsn-COA	Q27198
CC(C)(COP([O-])(O)OP([O-])(O)OCC1OC(n2cnc3c2ncnc3N)C(O)C1OP([O-])(O)O)C(O)C(=O)NCCC(=O)NCCS	1s7n-COA	Q8ZPC0
CC(C)(COP([O-])(O)OP([O-])(O)OCC1OC(n2cnc3c2ncnc3N)C(O)C1OP([O-])(O)O)C(O)C(=O)NCCC(=O)NCCS	1sst-COA	P43886
CC(C)(COP([O-])(O)OP([O-])(O)OCC1OC(n2cnc3c2ncnc3N)C(O)C1OP([O-])(O)O)C(O)C(=O)NCCC(=O)NCCS	1xa4-COA	P31572
CC(C)(COP([O-])(O)OP([O-])(O)OCC1OC(n2cnc3c2ncnc3N)C(O)C1OP([O-])(O)O)C(O)C(=O)NCCC(=O)NCCS	2c43-COA	Q9NRN7
CC(C)(COP([O-])(O)OP([O-])(O)OCC1OC(n2cnc3c2ncnc3N)C(O)C1OP([O-])(O)O)C(O)C(=O)NCCC(=O)NCCS	2cnt-COA	Q8ZJW4
CC(C)(COP([O-])(O)OP([O-])(O)OCC1OC(n2cnc3c2ncnc3N)C(O)C1OP([O-])(O)O)C(O)C(=O)NCCC(=O)NCCS	2il4-COA	Q9CAQ2
CC(C)(COP([O-])(O)OP([O-])(O)OCC1OC(n2cnc3c2ncnc3N)C(O)C1OP([O-])(O)O)C(O)C(=O)NCCC(=O)NCCS	2p2f-COA	Q8ZKF6
CC(C)(COP([O-])(O)OP([O-])(O)OCC1OC(n2cnc3c2ncnc3N)C(O)C1OP([O-])(O)O)C(O)C(=O)NCCC(=O)NCCS	2p8u-COA	Q01581
CC(C)(COP([O-])(O)OP([O-])(O)OCC1OC(n2cnc3c2ncnc3N)C(O)C1OP([O-])(O)O)C(O)C(=O)NCCC(=O)NCCS	2pfr-COA	P11245
CC(C)(COP([O-])(O)OP([O-])(O)OCC1OC(n2cnc3c2ncnc3N)C(O)C1OP([O-])(O)O)C(O)C(=O)NCCC(=O)NCCS	2psw-COA	Q9GZZ1
CC(C)(COP([O-])([O-])OP([O-])(O)OCC1OC(n2cnc3c2ncnc3N)C(O)C1OP([O-])(O)O)C(O)C(=O)NCCC(=O)NCCS	2x7b-COA	Q980R9
CC(C)(COP(=O)(O)OP(=O)(O)OCC1OC(n2cnc3c2ncnc3N)C(O)C1OP(=O)(O)O)C(O)C(=O)NCCC(=O)NCCS	3f8k-COA	Q97V23
CC(C)(COP(=O)(O)OP(=O)(O)OCC1OC(n2cnc3c2ncnc3N)C(O)C1OP(=O)(O)O)C(O)C(=O)NCCC(=O)NCCS	3fbu-COA	Q81Q99
CC(C)(COP(=O)(O)OP(=O)(O)OCC1OC(n2cnc3c2ncnc3N)C(O)C1OP(=O)(O)O)C(O)C(=O)NCCC(=O)NCCS	3gy9-COA	B1YEL6
CC(C)(COP([O-])(O)OP([O-])(O)OCC1OC(n2cnc3c2ncnc3N)C(O)C1OP([O-])(O)O)C(O)C(=O)NCCC(=O)NCCS	3l92-COA	Q8ZJN9
CC(C)(COP([O-])([O-])OP([O-])(O)OCC1OC(n2cnc3c2ncnc3N)C(O)C1OP([O-])(O)O)C(O)C(=O)NCCC(=O)NCCS	3lbe-COA	Q8DUV0
CC(C)(COP([O-])([O-])OP([O-])(O)OCC1OC(n2cnc3c2ncnc3N)C(O)C1OP([O-])(O)O)C(O)C(=O)NCCC(=O)NCCS	3lcj-COA	P0A530
CC(C)(COP([O-])([O-])OP([O-])(O)OCC1OC(n2cnc3c2ncnc3N)C(O)C1OP([O-])(O)O)C(O)C(=O)NCCC(=O)NCCS	3owc-COA	Q9I0Q8
CC(C)(COP([O-])([O-])OP([O-])(O)OCC1OC(n2cnc3c2ncnc3N)C(O)C1OP([O-])(O)O)C(O)C(=O)NCCC(=O)NCCS	3qmn-COA	Q9KPB6
CC(C)(COP([O-])(O)OP([O-])(O)OCC1OC(n2cnc3c2ncnc3N)C(O)C1OP([O-])(O)O)C(O)C(=O)NCCC(=O)NCCSS	2vig-COS	P16219
CC(C)(COP([O-])(O)OP([O-])(O)O)C(O)C(=O)NCCC(=O)NCCS	3k9w-4PS	Q3JW91
CCCCSCC1C[NH+](Cc2c[nH]c3c2ncnc3N)CC1O	3dp9-BIG	Q9KPI8
CC(C)n1c2ccc(C3CCCCO3)cc2c2c3c(c4c(c21)CCc1nn(C)cc1-4)C(=O)N=C3	3l8p-0CE	Q02763
CC(C)n1c2ccccc2c(-c2ccc(F)cc2)c1CCC(O)CC(O)CC(=O)[O-]	1hwi-115	P04035
CC(C)n1c2ccccc2nc1S([O-])(O)O	3gnc-QQQ	Q3JP94
CC(C)[N+]1(C)C2CCC1CC(OC(=O)C(CO)c1ccccc1)C2	2x8m-X8M	Q8DR52
CC(C)n1c(-c2ccc(OC(F)(F)F)cc2)nnc1C1(c2ccc(F)cc2)CC1	3d5q-T30	P28845
CCCn1c(C2CC[NH2+]CC2)nc(-c2ccc(Cl)c(Cl)c2)c1-c1ccnc(NC2CCCCC2)n1	1pmq-880	P53779
CCCn1c(C2CC[NH+](C)CC2)nc(-c2ccc(Cl)c(Cl)c2)c1-c1ccnc(NC2CC2)n1	1pmn-984	P53779
CC(C)n1c(CCC(O)CC(O)CC(=O)[O-])c(-c2ccc(F)cc2)c2c1c(=O)n(-c1ccccc1)c1ccccc21	2q6c-HR1	P04035
CC(C)n1c(CCC(O)CC(O)CC(=O)[O-])c(-c2ccc(F)cc2)c(-c2ccc(F)cc2)c1C(=O)Nc1ccccc1	3cd7-882	P04035
CC(C)n1ncc2c1nc(C1C[NH+](Cc3ccccc3)CC1C)[nH]c2=O	3jsw-JAR	O76083
CC(C)n1nc(-c2cccc(O)c2)c2c1ncnc2N	2v4l-ABJ	P48736
CC(C)n1nc(-c2ccc(NC(=O)Nc3cccc(C(F)(F)F)c3)cc2)c2c1ncnc2N	3el8-PD5	P00523
CCCn1nc(C2=C(N)NON2)nc1C1=C(N)NON1	2cgw-3C3	O14757
CC(C)n1nc(Cc2cccc3ccccc32)c2c1ncnc2N	3i7b-BK1	Q9BJF5
CC(C)n1nc(Cc2cccc3ccccc32)c2c1ncnc2N	3ncg-BK1	A3FQ16
CC(C)n1nc(C#Cc2cccc(O)c2)c2c1ncnc2N	2wxn-DLN	O35904
CC(CNc1ccc(OC(F)(F)F)cc1)NC(=O)C(CS(=O)(=O)Cc1ccccc1)NC(=O)N1CCOCC1	2hhn-GNQ	P25774
CC(C)Nc1cc(NC2CCC([NH3+])CC2)nc2c(C#N)cnn21	2vts-LZC	P24941
C#CCN(Cc1ccc2[nH]c(N)nc(=O)c2c1)c1ccc(C(=O)NC(CCC(=O)[O-])C(=O)[O-])cc1	1an5-CB3	P0A884
C#CCN(Cc1ccc2[nH]c(N)nc(=O)c2c1)c1ccc(C(=O)NC(CCC(=O)[O-])C(=O)[O-])cc1	1vze-CB3	P00469
C#CCN(Cc1ccc2[nH]c(N)nc(=O)c2c1)c1ccc(C(=O)NC(CCC(=O)[O-])C(=O)[O-])cc1	1zpr-CB3	P0A884
C#CCN(Cc1ccc2[nH]c(N)nc(=O)c2c1)c1ccc(C(=O)NC(CCC(=O)[O-])C(=O)[O-])cc1	2oip-CB3	Q5CGA3
CCCN(CCC)C(=O)c1cc(C)cc(C(=O)NC(Cc2cc(F)cc(F)c2)C(O)C2CC(Oc3ccccc3)C[NH2+]2)c1	2qmf-CS9	P56817
CCCN(CCC)C(=O)c1cc(C)cc(C(=O)NC(Cc2cc(F)cc(F)c2)C(O)C2CC(OCc3ccccc3)C[NH2+]2)c1	2qmd-CS7	P56817
CCCN(CCC)C(=O)c1cc(C)cc(C(=O)NC(Cc2cc(F)cc(F)c2)C(O)C2CC(OCC)CC[NH2+]2)c1	2qp8-SC7	P56817
CCCN(CCC)C(=O)c1cc(C)cc(C(=O)NC(Cc2cc(F)cc(F)c2)C(O)C2[NH2+]CCN(Cc3ccccc3)C2=O)c1	3cic-316	P56817
CCCN(CCC)C(=O)c1cc(C)cc(C(=O)NC(Cc2cc(F)cc(F)c2)C(O)C2[NH2+]CN(Cc3ccccc3)C2=O)c1	3cid-318	P56817
CCCN(CCC)C(=O)c1cc(C)cc(C(=O)NC(Cc2cc(F)cc(F)c2)C(O)C[NH2+]Cc2cccc(I)c2)c1	2iqg-F2I	P56817
CCCN(CCC)C(=O)c1cc(C)cc(C(=O)NC(Cc2cc(F)cc(F)c2)C(O)C[NH2+]Cc2cccc(OC)c2)c1	2qk5-CS5	P56817
CCCN(CCC)C(=O)c1cc(C)cc(C(=O)NC(Cc2cc(F)cc(F)c2)C(O)C[NH2+]Cc2cccc(OC)c2)c1	3l58-CS5	P56817
CCCN(CCC)C(=O)c1cc(C(N)=O)cc(C(=O)NC(Cc2cc(F)cc(F)c2)C(O)C[NH2+]Cc2cccc(OC)c2)c1	2p83-MR0	P56817
CCCN(CCC)C(=O)C(O)C(O)CO	2wpb-ZZI	P0A6L4
CC(C)N(CCNS(C)(=O)=O)C(=O)C(C)N1CCC(NS(=O)(=O)c2ccc3cc(Cl)ccc3c2)C1=O	2j4i-GSJ	P00742
CC(C)N=CC(O)COc1cccc2ccccc21	3mjn-RNP	P24627
CCC(NC(=O)c1cc2[nH]nc(NC(=O)c3ccc(N4CC[NH+](C)CC4)cc3)c2s1)c1ccccc1	2xru-400	O14965
CCC(NC(=O)c1ccc2c(c1)c(C)c(C)n2Cc1ccc(-c2ccccc2C(=O)[O-])cc1)c1ccccc1	3kmg-538	P37231
C=CCN(C(=O)c1cc(Cl)cc(OCCCO[NH2+]C(=[NH2+])[NH3+])c1)C1CCCC1	1t4v-14A	P00734
CCCNC(=O)C1CCCN1C(=O)C([NH3+])C(c1ccccc1)c1ccccc1	3da9-44U	P00734
CC(CNC(=O)c1ccc(S(N)(=O)=O)cc1)Cn1ccc2ccccc21	1if7-SBR	P00918
CCCNC(=O)OC1OC(CO)C(O)C(O)C1NC(C)=O	2uwg-GYU	P10968
CC(C)[NH+]1CCC(c2cc(-c3ccc(F)cc3Cl)c3c(c2)N(c2c(Cl)cccc2Cl)C(=O)NC3)CC1	3gc7-B45	Q16539
CCC[NH+]1CCC(c2nc3cccc(C(N)=O)c3[nH]2)CC1	2rcw-AAI	P09874
CC(C)[NH2+]CC(O)COc1cccc2[nH]c3ccccc3c21	2rh1-CAU	P07550
CC(C)([NH3+])c1ccc(-c2nc(Nc3ccc(CC[NH+]4CCOCC4)cc3)ncc2Cl)cc1	1oec-AA2	P21802
CC(C)[NH+](CCC(C(N)=O)(c1ccccc1)c1ccccn1)C(C)C	3apw-DP0	P19652
C#CC[NH+](C)CCCOc1ccc(Cl)cc1Cl	2bxr-MLG	P21397
CCC(=NOCC=CCl)C1=C([O-])CC(C2CCOCC2)CC1=O	3k8x-B89	Q00955
CC(C)Oc1ccc2c(c1)CCc1c3c(c4c(c1-2)C(=O)N=C4)c1ccccc1n3CCO	3dtc-VIN	P80192
CCCOc1cc(C2(C)CNC(=O)O2)ccc1OC	1xm6-5RM	Q07343
CC(C)(Oc1ccc(F)cc1Cl)C(=O)NC1C2CC3CC1CC(S(C)(=O)=O)(C3)C2	2ilt-NN1	P28845
CCC(=O)c1ccc(O)cc1O	2ye4-2FY	P07900
CCCOc1ccnc2[nH]cc(-c3ccnc(N)n3)c21	3bhu-MHR	P24941
CCC(=O)CCC(=O)NC(Cc1ccccc1)C(O)CN(CC(C)CC)S(=O)(=O)c1ccc(OC)cc1	2qi7-MZ9	O38732
CCC(O)(CC)CSC(C)C1=CCC2C(=CC=C3CC(O)C(OCCO)C(O)C3)CCCC12C	2zl9-VDA	P13053
CCC(O)(CC)CSC(C)C1=CCC2C(=CC=C3CC(O)C(OCCO)C(O)C3)CCCC12C	2zla-VDB	P13053
CC(C)OC(=O)c1cc(NC(=S)OC(C)C)ccc1Cl	1rt6-UC3	P04585
CC(C)(O)C(=O)Nc1ccc([N+](=O)[O-])c(C(F)(F)F)c1	2ax6-HFT	P10275
CCCOC(=O)NCCCCC([NH3+])C(=O)OP([O-])(O)OCC1OC(n2cnc3c2ncnc3N)C(O)C1O	2zio-AYB	Q8PWY1
CC(C(=O)N1CCOCC1)N1CCC(NS(=O)(=O)c2cc3ccc(Cl)cc3s2)C1=O	2j34-GS6	P00742
CC(C(=O)N1CCOCC1)N1CCC(NS(=O)(=O)c2cc3cc(Cl)ccc3[nH]2)C1=O	2j2u-GSQ	P00742
CC(C(=O)N1CCOCC1)N1CCC(NS(=O)(=O)c2cc3cc(Cl)ccc3s2)C1=O	2j38-GS5	P00742
CC(C(=O)N1CCOCC1)N1CCC(NS(=O)(=O)c2n[nH]c(-c3ccc(Cl)s3)n2)C1=O	2j94-G15	P00742
CC(C(=O)N1CCOCC1)N1CCC(NS(=O)(=O)C=Cc2ccc(Cl)s2)C1=O	2uwl-895	P00742
CC(C(=O)N1CCOCC1)N1CCC(NS(=O)(=O)CCc2ccc(Cl)s2)C1=O	2uwp-894	P00742
C=CC(=O)Nc1ccc2c(c1)nc(-c1ccccc1)nc2Nc1cc[nH]n1	3huc-G97	Q16539
CC(C(=O)Nc1cc(C2CC2)[nH]n1)c1ccc(N2CCNC2=O)cc1	2bpm-529	P24941
CC(C(=O)[O-])c1ccc(-c2ccccc2)c(F)c1	3n8w-FLP	P05979
CC(C(=O)[O-])c1ccc(-c2ccccc2)c(F)c1	3n8z-FLP	P05979
CCC(=O)Oc1c(C)cccc1C(=O)[O-]	3f2p-S3B	P00800
CC(C(=O)[O-])c1nn(C)c2nc(N)[nH]c(=O)c2c1=O	3h21-B52	B1UXN2
CC(C)SC1OC(CO)C(O)C(O)C1O	3ogs-IPT	Q70SY0
CC(CS(C)(=O)=O)Nc1ncc2cc(Oc3ccc(F)cc3F)c(=O)n(C)c2n1	3fls-FLS	Q16539
CC(CS(C)(=O)=O)Nc1n[nH]c2nc(Oc3ccc(F)cc3F)ncc12	3fml-FML	Q16539
CCCS(=O)(=O)CCC(=O)[O-]	2x1r-X1R	P04789
CC(C)S(=O)(=O)NC1Cc2ccc(Cn3cc(CO)c(C(F)(F)F)n3)cc2C1	3pmw-G69	P19491
CC(=CS(=O)(=O)NC1CCN(C(C)C(=O)N2CCOCC2)C1=O)c1ccc(Cl)s1	2uwo-701	P00742
CC(C)S(=O)(=O)NCC(C)c1ccc(-n2cc(CO)c(C(F)(F)F)n2)cc1	3pmv-557	P19491
CC(C)S(=O)(=O)NCCCN1c2ccccc2C2C(=O)C[NH+]3CCCCC3C21	1s1s-WAC	P77173
CCCS(=O)(=O)NC(C(=O)NC(CCSC)C(=O)NCc1ccc(C(=[NH2+])[NH3+])cc1)C(C)O	1wqv-PSM	P08709
CCN1c2cc3c(cc2C(C)(C)C1=O)[nH]c1c3CCCc2c(C)n[nH]c2-1	3coh-83H	O14965
CCn1c2ccc(S([O-])(O)O)cc2sc1=NN=c1sc2cc(S(=O)(=O)O)ccc2n1CC	1of0-EBS	P07788
CCN1c2cc([N+](=O)[O-])ccc2N(C)C(=O)c2cccnc21	1rt3-U05	P04585
CCN1c2cc([N+](=O)[O-])ccc2N(C)C(=O)c2cccnc21	1rth-U05	P04585
CCn1c2cc(OC(CC[NH3+])c3ccccc3)nc(C=CC(C)(C)O)c2nc1C1=C([NH3+])NON1	3e8e-G98	P00517
CCn1c2cc(OCC([NH3+])Cc3ccccc3)nc(C=CC(C)(C)O)c2nc1C1=C([NH3+])NON1	3e8c-G96	P00517
CCn1cnc2c1ncnc2N	2yee-2EC	P07900
CCN=c1cc2oc3cc(NCC)c(C)cc3c(-c3ccccc3C(=O)OCC)c-2cc1C	3d6z-RHQ	P39075
CC(Nc1nccc(-c2c(-c3cccc(C(F)(F)F)c3)nc(C3CC[NH2+]CC3)n2C)n1)c1ccccc1	1ouk-084	Q16539
CC(Nc1nccc(-c2c(-c3ccc(F)cc3)c(=O)n(C3CC[NH2+]CC3)n2C)n1)c1ccccc1	1ywr-LI9	P47811
CC(Nc1ncnc2cc(F)c(F)cc21)C(c1ccccc1)c1ccccc1	5std-UNN	P56221
CC(N=Cc1cc([NH+]=C([NH3+])[NH3+])ccc1O)C(=O)[O-]	3aas-GUS	P00760
C=C(NCc1c(COP([O-])(O)O)cnc(C)c1O)C(=O)[O-]	2hox-P1T	Q01594
CCN(CC)c1ncnc2c1ncn2C1OC(COP([O-])(O)OP([O-])(O)C(Br)(Br)P([O-])(O)O)C(O)C1O	3aaq-ARU	Q5ZUA2
CC[N+](C)(CC)CCC[n+]1c2cc(N)ccc2c2ccc(N)cc2c1-c1ccccc1	1n5r-PRM	P21836
CCN(CC)C(=O)c1ccc(O)c(OC)c1	2xdl-2DL	P07900
CCN(CC)C(=O)c1c(NC(=O)c2cccs2)sc2c1CC(C)(C)CC2	2uym-K03	P52732
CCN(CC)C(=O)Cc1cccc(NS(=O)(=O)c2cccc(Cl)c2C)n1	3g49-3G4	Q6QLL4
CCNC(=O)c1cc2c(nc(N)nc2-c2ccc(Cl)cc2Cl)s1	2wi6-ZZ6	P07900
CCNC(=O)c1cc2c(nc(N)nc2-c2cc(OCC[NH+]3CCCC3)c(Cl)cc2Cl)s1	2wi7-2KL	P07900
CCNC(=O)c1cc2c(nc(N)nc2-c2cc(OCC[NH+](CC)CC)c(Cl)cc2Cl)s1	3omu-IBD	Q389P1
CCN(C(=O)c1cc(C)cc(OCC(C)Nc2cc[nH+]cc2)c1)C(C)C	2uuj-896	P00734
CC(NC(=O)C1CCC[NH2+]1)C(=O)N1CCCC1C(=O)NC(Cc1ccccc1)C(=O)[O-]	1pj8-PRO_ALA_PRO_PHE	P06873
CC(NC(=O)c1cc(F)ccc1O)c1ccc(Br)cc1	4std-BFS	P56221
CCNC(=O)c1noc(-c2cc(Cl)c(O)cc2O)c1-c1ccc(C[NH+]2CCOCC2)cc1	2vcj-2EQ	P07900
CCNC(=O)c1noc(-c2cc(Cl)c(O)cc2O)c1-c1ccc(OC)cc1	2uwd-2GG	P07900
CC(NC(=O)C1(S(C)=O)C(C)C1(Cl)Cl)c1ccc(Br)cc1	6std-MS2	P56221
CC(NC(=O)Cc1c(Cl)ccc(NCC(F)(F)c2cccc[n+]2[O-])[n+]1[O-])c1cccc(Cl)c1	1z71-L17	P00734
CC(NC(=O)C(Cc1ccccc1)NC(=O)C(CCC(=O)[O-])NC(=O)C([NH3+])CC(N)=O)C(=O)NC(Cc1ccccc1)C(=O)[O-]	1w9q-ASN_GLU_PHE_ALA_PHE	O00560
CC(NC(=O)C(C)NC(=O)C(CCC(=O)[O-])NC(=O)C([NH3+])Cc1ccc([N+](=O)[O-])cc1)C(N)=O	1ytj-PPN_GLU_ALA_NLE_SER	P05896
CC(NC(=O)CNC(=O)C1CCC[NH2+]1)C(=O)[O-]	1ghb-PRO_GLY_ALA	P00766
CC(NC(=O)C[NH3+])C(=O)NC(Cc1c[nH]c2ccccc12)C(=O)[O-]	8gch-GLY_ALA_TRP	P00766
CC(NC(=O)C[NH3+])C(=O)NC(CCCNC(N)=[NH2+])C(=O)[O-]	1fn8-GLY_ALA_ARG	P35049
CC(NC(=O)C([NH3+])COP([O-])(O)O)C(=O)[O-]	3beg-SEP_ALA	Q07955
CCNC(=O)COc1ccc(Cl)cc1CNC(=O)C1CCCN1C(=O)C([NH3+])C1CCCCC1	1ta6-177	P00734
CCNC(=O)C(O)C(C)(C)COP(=O)(O)OP(=O)(O)OCC1OC(n2cnc3c2ncnc3N)C(O)C1OP(=O)(O)O	3gpc-COA	Q08AH3
CCNC(=O)N1N=C(c2cc(F)ccc2F)CC1(CCC[NH3+])c1ccccc1	2g1q-N9H	P52732
CC(NC(=O)OC(C)(C)C)C(=O)NC(C)C(=O)N1CCCC1C(=O)NC(CCC(=O)[O-])C(=O)[O-]	1hpg-BOC_ALA_ALA_PRO_GLU	Q07006
CCN(C(=O)OCC(CO[N+](=O)[O-])O[N+](=O)[O-])C1CC(C)S(=O)(=O)c2sc(S(N)(=O)=O)cc21	3k2f-NKX	P00918
CC[NH+]1CCCC1C(=O)NC1C2CC3CC(C2)CC1C3	3lz6-A0D	Q6QLL4
CC[NH2+]C1CC(C)S(=O)(=O)c2sc(S(N)(=O)=O)cc21	1cil-ETS	P00918
CC[NH2+]C1CC(C)S(=O)(=O)c2sc(S(N)(=O)=O)cc21	3fw3-ETS	P22748
CC[NH2+]C1CN(CCOCC)S(=O)(=O)c2sc(S(N)(=O)=O)cc21	1a42-BZU	P00918
CC[NH2+]C1CN(CCOC)S(=O)(=O)c2sc(S(N)(=O)=O)cc21	1bnq-AL4	P00918
CC[NH2+]Cc1cn(CC(=O)Nc2sc3c(c2C(N)=O)CCCC3)nc1C(F)(F)F	3o6h-O25	P19491
CC(=[NH2+])N1CCC(Oc2ccc(C(Cc3ccc4ccc(C(N)=[NH2+])cc4c3)C(=O)[O-])cc2)C1	1mtw-DX9	P00760
CC(=[NH2+])N1CCC(Oc2ccc(C(Cc3ccc4ccc(C(N)=[NH2+])cc4c3)C(=O)[O-])cc2)CC1	1mts-BX3	P00760
CC(=[NH2+])[NH+]1CCC(Oc2ccc3[nH+]c(C)n(Cc4ccc5ccc(C(=[NH2+])[NH3+])cc5c4)c3c2)CC1	1qbo-711	P00760
CC([NH3+])C(=O)N1CCCC1C(=O)[O-]	2qer-ALA_PRO	A3FQ68
CC([NH3+])C(=O)NC(Cc1ccccc1)C(=O)NC(C(=O)[O-])C(C)O	2xs4-ALA_PHE_THR	D0EM77
CC([NH3+])C(=O)NC(Cc1cnc[nH]1)C(=O)NC(CO)C(=O)NC(CO)C(=O)[O-]	3mqr-ALA_HIS_SER_SER	Q93009
CC([NH3+])C(=O)NC(CCCNC(N)=[NH2+])C(=O)NC(C(=O)[O-])C(C)O	3mea-ALA_ARG_THR_M3L	Q96ES7
CC([NH3+])C(=O)NC(CCC(=O)[O-])C(=O)NC(C)C(=O)NC(C)C(=O)NC(CCC(N)=O)C(=O)NC(C)C(=O)[O-]	3hda-ALA_GLU_ALA_ALA_GLN_ALA	P16317
CC([NH3+])C(=O)NC(C)C(=O)NC(C)C(=O)NC(C)C(=O)[O-]	2zl4-ALA_ALA_ALA_ALA	P56156
CC([NH3+])C(=O)NC(C)C(=O)NC(C(=O)[O-])C(C)O	3mev-ALA_ALA_THR_M3L	Q96ES7
CC([NH3+])C(=O)NC(CC(=O)[O-])C(=O)NC(CCC(N)=O)C(=O)[O-]	3nco-ALA_ASP_GLN	D4PEB3
CC([NH3+])C(=O)NCC(=O)NC(C)C(=O)NC(C)C(=O)[O-]	1ztz-ALA_GLY_ALA_ALA	P03367
CC([NH3+])C(=O)NC(C(=O)NC(C(=O)NC(CC([O-])[O-])C(=O)NC(CCC([O-])[O-])C(=O)[O-])C(C)OP([O-])(O)O)C(C)O	3huf-SEP_THR_ASP_GLU_TPO	O43070
CC[NH+](Cc1cc(Nc2nc(C)cn3c(-c4cn[nH]c4)c[nH+]c23)sn1)C(C)(C)CO	3myg-EML	O14965
CC[NH+](CC)CCCC(C)Nc1cc[nH+]c2cc(Cl)ccc12	1cet-CLQ	Q27743
CC[NH+](CC)CCCCNc1ncc2cc(-c3cc(OC)cc(OC)c3)c(NC(=O)NC(C)(C)C)nc2n1	2fgi-PD1	P11362
CC[NH+](CC)CCNC(=O)c1c(C)[nH]c(C=C2C(=O)Nc3ccc(Cl)cc32)c1C	2xik-J60	O00506
CC[NH+](CC)CCNC(=O)c1c(C)[nH]c(C=C2C(=O)Nc3ccc(F)cc32)c1C	3miy-B49	Q08881
CC[NH+](CC)COc1ccc(Nc2ncc3c(n2)N(C)C(=O)N(c2c(Cl)cccc2Cl)C3)cc1	3fsf-FSS	Q16539
CC(=O)C1CCC2C3CCC4=CC(=O)CCC4(C)C3CCC12C	1mrq-STR	Q04828
CC(=O)C1CCC2C3CCC4=CC(=O)CCC4(C)C3CCC12C	2hzq-STR	P05090
CC(=O)C1CCC2C3CCC4CC(=O)CCC4(C)C3CCC12C	3cav-CI2	P51857
CC(=O)c1c(C)c2cnc(Nc3ccc(N4CC[NH2+]CC4)cn3)nc2n(C2CCCC2)c1=O	2euf-LQQ	Q01043
CCOc1ccc(-c2c3c(N)c(C(N)=O)sc3nc(N)c2C#N)cc1	2wi5-ZZ5	P07900
CC(=O)c1ccc(C)cc1NC(C(N)=O)c1c(Cl)cccc1Cl	1hpz-AAP	P03366
CC(=O)c1ccc(C)cc1NC(C(N)=O)c1c(Cl)cccc1Cl	1vru-AAP	P04585
CC(O)(c1ccc(C(=O)N(C2CC2)C2CC[NH+](CC3(C(N)=O)CC3)CC2)cc1)C(F)(F)F	3frj-A49	P28845
CCOc1ccc(Nc2c(C)c(NC3CCC[NH2+]C3)nc3ccnn32)cc1	3a2c-PDY	P49137
CCOc1ccnc(CCNC(=S)Nc2ccc(Cl)cn2)c1F	1jlc-FTC	P04585
CCOc1cc(OC2CCOC2)c(F)c(C(Nc2ccc(C(=[NH2+])[NH3+])cc2)C(=O)[O-])c1	2bz6-346	P08709
CCOc1cc(OCC)c(F)c(C(Nc2ccc(C(=[NH2+])[NH3+])c(O)c2)C(=O)NS(=O)(=O)c2cccc(N)c2)c1	1ygc-905	P08709
CC(=O)c1cc(=O)[nH]c(=O)n1C1OC(COP([O-])(O)O)C(O)C1O	3l0k-6AU	P11172
C=C(OC1C(O)C(CO)OC(OP([O-])(O)OP([O-])(O)OCC2OC(n3ccc(=O)[nH]c3=O)C(O)C2O)C1NC(C)=O)C(=O)[O-]	3iss-EPU	P0A749
CC(=O)C1=NN2c3cc(F)ccc3OCC2C1(CCC[NH+]1CCN(C(C)=O)CC1)c1ccccc1	2q2y-MKR	P52732
CC(=O)C1=NN(c2cc(C)ccc2F)CC1(CCC[NH+]1CCN(C(C)=O)CC1)c1ccccc1	2q2z-MKK	P52732
CC(O)(CBr)C(=O)Nc1ccc([N+](=O)[O-])c(C(F)(F)F)c1	2ax9-BHM	P10275
CCOC(Cc1ccc(OCc2csc(-c3ccc(Cl)cc3)n2)cc1C)C(=O)[O-]	3fei-CTM	Q07869
CCOC(Cc1ccc(OCc2csc(-c3ccc(Cl)cc3)n2)cc1C)C(=O)[O-]	3fej-CTM	P37231
CCOC(Cc1ccc(OCCc2ccc(OS(C)(=O)=O)cc2)cc1)C(=O)[O-]	1i7i-AZ2	P37231
CCOC(Cc1ccc(OCCn2c3ccccc3c3ccccc32)cc1)C(=O)[O-]	1knu-YPA	P37231
CCOC(Cc1ccc(OCCN2c3ccccc3Oc3ccccc32)cc1)C(=O)[O-]	1nyx-DRF	P37231
CC(=O)C=CC1C(O)=CC(O)C1CCCCCCC(=O)[O-]	2zb4-5OP	Q8N8N7
CC(=O)C(CCC[NH2+]C(=[NH2+])[NH3+])NC(=O)C1CCCN1C(=O)C([NH3+])Cc1ccccc1	3f6u-DPN_PRO_ACL	P04070
CC(O)C(C=O)C1N=C(C(=O)[O-])C(SC2C[NH2+]C(CNS(N)(=O)=O)C2)C1C	3pag-DRW	Q8RLA6
CC(O)(CCOP([O-])(O)OP([O-])(O)O)CC(=O)[O-]	2oi2-DP6	Q8DR51
CCOCn1c(=O)[nH]c(=O)c(C(C)C)c1Cc1ccccc1	1rt1-MKC	P04585
CCOCn1c(=O)[nH]c(=O)c(C(C)C)c1Sc1ccccc1	1c1c-612	P04585
CC(O)CNc1ncnc2[nH]c(-c3ccccc3)c(-c3ccccc3)c21	2brn-DF1	O14757
CC(O)C(NC(=O)C1CCCN1C(=O)C([NH3+])COP([O-])(O)O)C(=O)NC(Cc1ccccc1)C(=O)[O-]	3k0k-SEP_PRO_THR_PHE_CL	P38398
CC(O)C(NC(=O)C(Cc1ccccc1)NC(=O)C[NH3+])C(=O)NC(CCC(N)=O)C(=O)[O-]	2zl2-GLY_PHE_THR_GLN	P56156
CC(O)C(NC(=O)C([NH3+])Cc1c[nH]c2ccccc12)C(=O)NC(Cc1c[nH]c2ccccc12)C(=O)NC(CC(N)=O)C(=O)[O-]	2ns8-TRP_THR_TRP_ASN	P04483
CC(O)C(NC(=O)OCc1ccccc1)C(=O)[O-]	1kro-PHQ_DTH	P00800
CCOC(=O)c1ccc2nc(N)sc2c1	3kid-2BS	P00749
CCOC(=O)c1c(C(C#N)=C[NH3+])c2ccc(Cl)c(Cl)c2n1C	2vag-V25	P49759
CCOC(=O)c1c(C(C#N)=C[NH3+])c2ccc(Cl)c(Cl)c2n1C	2wu7-V25	P49761
CC(O)C(O)C1CNc2nc(N)[nH]c(=O)c2N1	3e67-H4B	P29477
CC(O)C(O)C1CNc2nc(N)[nH]c(=O)c2N1	3e6n-H4B	P29477
CC(O)C(O)C1=Nc2c(nc(N)[nH]c2=O)NC1	1dcp-HBI	P61459
CCOC(=O)c1oc2cccc(OCC(O)C[NH2+]C(C)C)c2c1C	3ny9-JSZ	P00720
CCOC(=O)C(Cc1ccccc1)NC(=O)C1CSCCN1S(=O)(=O)c1ccc(C)cc1	1j4h-SUB	P62942
CCOC(=O)CCc1ccc(S(N)(=O)=O)cc1	2nn7-M29	P00915
CCOC(=O)CCN(C(=O)c1ccc2c(c1)nc(CNc1ccc(C(=[NH2+])[NH3+])cc1)n2C)c1ccccn1	1kts-C24	P00734
CCOC(=O)C(O)CC(=O)N(CC(C)C)NC(=O)C(CC)NC(=O)C(CC(C)C)NC(=O)OCc1ccccc1	3gcd-AZ0	Q9KS12
CCOC(=O)CON=C(c1ccccn1)C1(c2ccc3c(c2)nc(CNc2ccc(C(=[NH2+])[NH3+])cc2)n3C)CC1	1g30-T87	P00734
CC(OC(=O)Nc1ccc(Cl)c(Cl)c1)c1nc2ccccc2[nH]1	3jvr-AGX	O14757
CCOC(=O)NC(Cc1ccccc1)C(=O)N1CCCC1C(=O)NNCCCC[NH3+]	1ae8-AZL	P00734
CC(=O)CSCCS([O-])(O)O	3q6j-KPC	Q56839
CC(=O)N1c2cccc(O)c2NC2=C(C(=O)CC(C)(C)C2)C1c1ccc(Cl)cc1Cl	3gol-XND	O92972
CC(=O)N1Cc2[nH]nc(NC(=O)c3ccccc3)c2C1	2c4g-514	P24941
CC(=O)N1CCc2c3cc(C)ccc3[nH]c2C1c1cccc(O)c1	3k3b-L31	P52732
CC(=O)N1CCCC1C(=O)NC(C(=O)NC(CCC(N)=O)C(=O)NC(CCC(=O)[O-])C(=O)NC(C(N)=O)C(C)O)C(C)C	1d00-ACE_PRO_VAL_GLN_GLU_THR_NH2	Q12933
CC(=O)N1CCN(c2ccc(OCC3COC(Cn4ccnc4)(c4ccc(Cl)cc4Cl)O3)cc2)CC1	3ozw-KKK	P39662
CC(=O)N1CCN(C(=O)Cc2ccc(Nc3ncc(F)c(Nc4ccc(C(=O)Nc5ccccc5Cl)cc4)n3)cc2)CC1	3h0z-45B	O14965
CC(=O)N1CCN(C(=O)C(Cc2cccc(C(=[NH2+])[NH3+])c2)NS(=O)(=O)c2ccc3ccccc3c2)CC1	1k1m-FD4	P00760
CC(=O)N1CC(O)CC1C(=O)NC(CCC[NH+]=C([NH3+])[NH3+])C(=O)c1nc2ccccc2s1	1nc6-ABB	P00760
CC(=O)N1N=C(c2ccccc2Cl)CC1c1cccc(O)c1	1yrs-L47	P52732
CC(=O)NC1C2OCC(O2)C(OC2OC(CO)C(O)C(O)C2NC(C)=O)C1OC(C)C(=O)NC(C)C(=O)NC(C)C(=O)[O-]	1qte-NAG_AH0_ALA_DAL	P0AGC3
CC(=O)Nc1ccc(C2NC(=O)NC2=O)cc1	3l0t-Z94	P78536
CC(=O)Nc1ccc(CN2CCC3(CC2)C(NC2CCCCC2)NC(=O)N3c2cccc(F)c2)cc1	3fkt-SII	P56817
CC(=O)Nc1ccc(O)cc1	1tym-TYL	P01308
CC(=O)Nc1ccsc1C(=O)[O-]	3gv9-GV9	P00811
CC(=O)Nc1c[nH]nc1C(=O)Nc1ccc(F)cc1	2vtn-LZ7	P24941
CC(=O)NC1C(=NOC(=O)Nc2ccccc2)OC(CO)C(O)C1O	2vcb-OAN	Q0TST1
CC(=O)NC1C(O)C=C(C(=O)[O-])OC1C(O)C(O)CO	1e8v-DAN	Q9Q2W5
CC(=O)NC1C(O)C=C(C(=O)[O-])OC1C(O)C(O)CO	1vcu-DAN	Q9Y3R4
CC(=O)NC1C(O)C=C(C(=O)[O-])OC1C(O)C(O)CO	1z4z-DAN	P04850
CC(=O)NC1C(O)CC(O)(C(=O)[O-])OC1C(O)C(O)CO	1e8u-SLB	Q9Q2W5
CC(=O)NC1C(O)CC(O)(C(=O)[O-])OC1C(O)C(O)CO	1v0f-SLB	Q858B1
CC(=O)NC1C(O)CC(O)(C(=O)[O-])OC1C(O)C(O)CO	1w0p-SIA	A5F7A4
CC(=O)NC1C(O)CC(O)(C(=O)[O-])OC1C(O)C(O)CO	2c25-SIA	Q309D1
CC(=O)NC1C(O)CC(O)(C(=O)[O-])OC1C(O)C(O)CO	2v73-SIA	Q0TTQ4
CC(=O)NC1C(O)CC(O)(C(=O)[O-])OC1C(O)C(O)CO	2zg1-SIA	O15389
CC(=O)NC1C(O)CC(O)(C(=O)[O-])OC1C(O)C(O)CO	3ah1-SLB	P46084
CC(=O)NC1C(O)CC(O)(C(=O)[O-])OC1C(O)C(O)CO	3r4s-SLB	P18640
CC(=O)NC1C(O)C([NH3+])C(C)OC1OP([O-])(O)OP([O-])(O)OCC1OC(n2ccc(=O)[nH]c2=O)C(O)C1O	3bss-UD4	Q0P9D1
CC(=O)NC1C(O)C(O)C(CO)OC1Oc1ccc([N+](=O)[O-])cc1	3f64-LEC	Q99003
CC(=O)NC1C(O)C(O)C(CO)OC1OCC([NH3+])C(=O)[O-]	2d3s-TNR	O24313
CC(=O)NC1C(O)C(O)C(CO)OC1OP([O-])(O)O	2qkx-GN1	P96382
CC(=O)NC1C(O)C(O)C(CO)OC1OP([O-])(O)OP([O-])(O)OCC1OC(n2ccc(=O)[nH]c2=O)C(O)C1O	1hv9-UD1	P0ACC7
CC(=O)NC1C(O)C(O)C(CO)OC1OP([O-])(O)OP([O-])(O)OCC1OC(n2ccc(=O)[nH]c2=O)C(O)C1O	1lrk-UD1	P09147
CC(=O)NC1C(O)C(O)C(CO)OC1OP([O-])(O)OP([O-])(O)OCC1OC(n2ccc(=O)[nH]c2=O)C(O)C1O	1uae-UD1	P0A749
CC(=O)NC1C(O)C(O)C(CO)OC1OP([O-])(O)OP([O-])(O)OCC1OC(n2ccc(=O)[nH]c2=O)C(O)C1O	1vgv-UD2	P27828
CC(=O)NC1C(O)C(O)C(CO)OC1OP([O-])(O)OP([O-])(O)OCC1OC(n2ccc(=O)[nH]c2=O)C(O)C1O	2rl1-UD1	P45025
CC(=O)NC1C(O)C(O)C(CO)OC1OP([O-])(O)OP([O-])(O)OCC1OC(n2ccc(=O)[nH]c2=O)C(O)C1O	3kr6-UD1	P0A749
CC(=O)NC1C(O)C(O)C(CO)OC1OP([O-])(O)OP([O-])(O)OCC1OC(n2ccc(=O)[nH]c2=O)C(O)C1O	3lth-UD1	P33038
CC(=O)NC1C(O)C(O)C(CO)OC1OP([O-])(O)OP([O-])(O)OCC1OC(n2ccc(=O)[nH]c2=O)C(O)C1O	3q8x-UD1	Q57231
CC(=O)NC1C(O)C(O)C(CO)OC1SP([O-])(O)OP([O-])(O)OCC1OC(n2ccc(=O)[nH]c2=O)C(O)C1O	2xgo-ZKD	Q8PC69
CC(=O)NC1C(O)C(O)C(C(=O)[O-])OC1OP([O-])(O)OP([O-])(O)OCC1OC(n2ccc(=O)[nH]c2=O)C(O)C1O	3q2i-HP7	Q7NQL0
CC(=O)NC1C(O)C(OS([O-])(O)O)C(CO)OC1OC1CC(C(=O)NCCS(=O)(=O)O)[NH2+]C1CO	1lsp-BUL	P00717
CC(=O)NC1C(O)C(OS([O-])(O)O)C(CO)OC1OC1CC(C(=O)NCCS(=O)(=O)O)[NH2+]C1CO	1sly-BLG	P0AGC4
CC(=O)NC1C(O)OC(CO)C(O)C1O	2orj-BM3	P35247
CC(=O)NC1C(O)OC(CO)C(O)C1OC1OC(CO)C(O)C(O)C1O	1y2u-NAG_GAL	Q00022
CC(=O)NC1C(O)OC(CO)C(O)C1OC(C)C(=O)[NH2+]C(C)C(=O)NC(CCC(=O)NC(CCCC[NH3+])C(N)=O)C(N)=O	1twq-AMU_ALA_GMA_LYS_NH2	Q96LB9
CC(=O)NC1C(O)OC(CO)C(OC2OC(CO)C(OC3OC(CO)C(O)C(O)C3NC(C)=O)C(O)C2NC(C)=O)C1O	1bb5-CTO	P61626
CC(=O)NC1C(O)OC(CO)C(OC2OC(CO)C(O)C(O)C2NC(C)=O)C1OC(C)C(=O)[NH2+]C(C)C(=O)NC(CCC(=O)[O-])C(=O)[O-]	1d0k-NAG_AMU_ALA_DGL	P41052
CC(=O)NC1C(O)OC(CO)C(OC2OC(CO)C(O)C(O)C2O)C1O	1gan-NDG_GAL	P56217
CC(=O)NC1C(O)OC(CO)C(OC2OC(CO)C(O)C(O)C2O)C1O	1slt-NDG_GAL	P11116
CC(=O)NC1C(O)OC(CO)C(OC2OC(CO)C(O)C(O)C2O)C1O	1w6p-GAL_NDG	P09382
CC(=O)NC1C(O)OC(CO)C(OC2OC(CO)C(O)C(O)C2OC2OC(C)C(O)C(O)C2O)C1O	1uld-GAL_NAG_FUC	Q9P4R8
CC(=O)NC1C(=O)OC(CO)C(OC2OC(C(=O)[O-])=CC(O)C2O)C1O	3e80-HS2	Q46080
CC(=O)NC1C(OP([O-])(O)OP([O-])(O)OCC2OC(n3ccc(=O)[nH]c3=O)C(O)C2O)OC(CO)C(O)C1OC(C)C(=O)NC(C)C(=O)[O-]	2jfg-UMA	P14900
CC(=O)NC1C(OP([O-])(O)OP([O-])(O)OCC2OC(n3ccc(=O)[nH]c3=O)C(O)C2O)OC(CO)C(O)C1OC(C)(C(=O)[O-])C(O)CO	2z2c-UDP_UDC	P0A749
CC(=O)NC1C(OP([O-])(O)OP([O-])(O)OCC2OC(n3ccc(=O)[nH]c3=O)C(O)C2O)OC(CO)C(O)C1OC(CF)(OP([O-])(O)O)C(=O)[O-]	1a2n-TET	P0A749
CC(=O)Nc1nc2ccc(-c3cnc(Cl)c(NS(=O)(=O)c4ccc(F)cc4)c3)cc2s1	3qk0-QK0	P48736
CC(=O)Nc1nc2c(s1)C(=O)NCCC2	2wmq-ZYQ	O14757
CC(=O)Nc1nccc(-c2c(C)[nH]c3cccc[n+]32)n1	1oiq-HDU	P24941
CC(=O)Nc1nc(C)c(-c2cnc(F)c(NS(=O)(=O)c3sc(C)nc3C)c2)s1	3lu8-IQX	P02768
CC(=O)N=c1[nH]c(C)c(-c2ccc(Cl)c(S(=O)(=O)NCCO)c2)s1	2chz-093	P48736
CC(=O)Nc1nnc(S(N)(=O)=O)s1	3iai-AZM	Q16790
CC(=O)Nc1sccc1C(=O)[O-]	2hdu-F12	P00811
CC(=O)N(C)c1cccc(-c2nnc3ccc(-c4ccccc4)nn32)c1	1y2g-CL3	P77173
CC(=O)NC(CC1CCCCC1)C(=O)N1CCCC1C(=O)NCc1cccc(Cl)c1	3f68-91U	P00734
CC(=O)NC(Cc1ccccc1)C(=O)[O-]	2hu7-ACE_PHE	Q9YBQ2
CC(=O)NC(Cc1ccccc1)C(O)(O)C(F)(F)F	1gg6-APL	P00766
CC(=O)NC(Cc1ccc(C(N)=[NH2+])cc1)C(=O)NC(C(=O)NC(Cc1ccc[n+](C)c1)C(=O)[O-])C1CCCCC1	7kme-BNN_CHG_PRR	P00734
CC(=O)NC(Cc1ccc(Oc2cc([N+](=O)[O-])c(O)c([N+](=O)[O-])c2)cc1)C(=O)[O-]	2roy-P28	P02766
CC(=O)NC(Cc1cc(I)c(O)c(I)c1)C(=O)NC(C(=O)[O-])C(C)O	1sdw-IYT	P14925
CC(=O)NCC(Cc1ccc(OCCc2nc(-c3ccccc3)oc2C)cc1)Nc1ccccc1C(=O)c1ccccc1	2pob-GW4	P37231
CC(=O)NCCCCC([NH3+])C(=O)[O-]	2r0y-ALY	Q02206
CC(=O)NC(CCC(=O)OP([O-])(O)O)C(=O)[O-]	2x2w-X2W	P0A6C8
CC(=O)NC(C)C(=O)N1CCCC1C(=O)NC(C)C(=O)[O-]	1nes-ALA_PRO_ALA_ACE	P00772
CC(=O)NC(C)C(=O)NC(Cc1ccccc1)C(O)CN(Cc1cccs1)S(=O)(=O)c1cc(F)c(F)cc1F	2qhy-MZ1	O38732
CC(=O)NC(C)C(=O)NC(COP([O-])(O)O)C(=O)N1CCCC1C(=O)[O-]	1ohe-ACE_ALA_SEP_PRO	O60729
CC(=O)NC(CO)C(O)C(O)C(O)COP([O-])(O)O	2wu1-FGS	P0A759
CC(=O)NC(C(=O)NC(Cc1ccccc1)CC(O)C(Cc1ccccc1)NC(=O)C1CN(c2cccc(C(C)=O)c2)C(=O)O1)C(C)C	2q54-MU1	O38732
CC(=O)NC(C(=O)NC(Cc1ccccc1)C(O)C[NH+](CC1CCCCC1)NC(=O)C(NC(C)=O)C(C)C)C(C)C	1hih-C20	P03366
CC(=O)OC12C(C3C=C(CO)CC4(O)C(=O)C(C)=CC4C3(O)C(C)C1O)C2(C)C	1ptr-PRB	P28867
CC(=O)OC1CC2(C)C(CC(O)C3C4(C)CCC(O)C(C)C4CCC32C)C1=C(CCC=C(C)C)C(=O)[O-]	1q23-FUA	P62577
CC(=O)OC1CC2(C)C(CC(O)C3C4(C)CCC(O)C(C)C4CCC32C)C1=C(CCC=C(C)C)C(=O)[O-]	1qca-FUA	P00484
CC(=O)Oc1c(C)cccc1C(=O)[O-]	3fcq-M3S	P00800
CC(=O)OC1CC(C)(C)C(=C=CC(C)=CC=CC=CC=C(C)C=C2C=C(C=CC34OC3(C)CC(O)CC4(C)C)C(=O)O2)C(C)(O)C1	3iis-PID	P80484
CC(=O)OC1C(C)OC(c2ccc3c(c2O)C(O)C24OC2(C3=O)C2(O)C(=O)C=C(C)CC2(O)CC4O)CC1OC(=O)C=CC=CC=CC=CC(=O)[O-]	2y31-SMQ	Q9AMH9
CC(=O)OC1(C(C)=O)CCC2C3C=C(Cl)C4=CC(=O)C5CC5C4(C)C3CCC21C	2oz7-CA4	P10275
CC(=O)OCc1ccccc1	3huk-J0Z	P00720
CCOP(=O)(Cc1ccc(C)cc1)OCC	1dpm-EBP	P0A434
CCOP(=O)(Cc1ccc(C)cc1)OCC	3e3h-EBP	P0A434
CC(OP([O-])(O)O)C(NC(=O)C[NH3+])C(=O)N1CCCCC1C(=O)NC(Cc1ccc2ccccc2c1)C(=O)NC(CCC(N)=O)C(N)=O	2q5a-PHE_GLN_TPO_CPI_NAL_NH2	Q13526
C=C(OP([O-])(O)O)C(=O)[O-]	2xgz-PEP	P00924
CCS(=O)(=O)c1ccc(OC)c(Nc2ncc(-c3cccc(-c4ccccn4)c3)o2)c1	1y6a-AAZ	P35968
CCS(=O)(=O)NC(Cc1ccc(-c2ccccc2)cc1)C(=O)NC(CCC(N)=O)C(=O)NCc1ccc(C(=[NH2+])[NH3+])cc1	1wtg-3BP	P08709
CCS(=O)(=O)NC(Cc1c[nH]c2ccccc12)C(=O)NC(CCC(N)=O)C(=O)NCc1ccc(C(=[NH2+])[NH3+])cc1	1wun-P5B	P08709
CCS(=O)(=O)NC(Cc1c[nH]c2ccc(OCc3cccc(C(=O)[O-])c3)cc12)C(=O)NC(CCC(N)=O)C(=O)NCc1ccc(C(N)=[NH2+])cc1	2zzu-359	P08709
Clc1ccc2c(c1Nc1ccnc(Nc3cccc(N4CCOCC4)c3)n1)OCO2	2vx0-7X7	P54760
Clc1ccc2c(c1)ncnc2NCC1CC1	3hmp-CX4	P33981
Clc1ccccc1C(c1ccccc1)(c1ccccc1)n1ccnc1	2xfh-CL6	P48635
Clc1cccc(-c2cc(NCc3ccncc3)n3nccc3n2)c1Cl	2r3f-SC8	P24941
Clc1cccc(Nc2nc3nc[nH]c3c(OCC3CCCCC3)n2)c1	1h1r-6CP	P24941
Clc1ccc(CN(Cc2ccc(Cl)cc2)c2nn[nH]n2)cc1	1pzo-CBT	P62593
Clc1ccc(C[NH+]2CCN(c3c4nc(-c5ccc(C[NH+]6CCOCC6)cc5)[nH]c4[nH+]cc3Br)CC2)cc1	2x6d-X6D	O14965
Clc1ccc(COC(Cn2ccnc2)c2ccc(Cl)cc2Cl)cc1	3ozv-ECN	P39662
Clc1ccc(COC(Cn2ccnc2)c2ccc(Cl)cc2Cl)c(Cl)c1	3ozu-X89	P39662
Clc1c[nH+]c2c(Nc3ccc(N4CCOCC4)cc3)nc(-c3cccnc3)cn12	2xne-ASH	O14965
CN1c2ccccc2C23CC4C(C2O)C2CC(O)[NH+]4C(C2)C13	2que-AJM	P59071
Cn1c2c(ccc(Cl)c2Cl)c2c1C(=O)NC1(CC[NH+](C)CC1)C2C#N	3bhy-CL_7CP	O43293
Cn1c2cc(O)c(C(=O)[O-])cc2c(-c2cn(CCC(=O)Nc3ccc(-c4ccccc4)cc3)nn2)c1-c1ccccc1	3o5x-JZG	Q06124
CN1c2c(nc(N)[nH]c2=O)NCC1CNc1ccc(C(=O)NC(CCC(=O)[O-])C(=O)[O-])cc1	1xpg-C2F	Q9X112
CN1c2c(nc(N)[nH]c2=O)NCC1CNc1ccc(C(=O)NC(CCC(=O)[O-])C(=O)[O-])cc1	2idk-C2F	P13255
Cn1c2nc(N3CCCC([NH3+])C3)n(Cc3ccccc3C#N)c2c(=O)n(C)c1=O	3g0d-XIH	P27487
Cn1c2nc(N3CC[NH2+]CC3)n(Cc3ccccc3)c2c(=O)n(C)c1=O	2aj8-SC3	P22411
Cn1c2nc(N3CC[NH2+]CC3)n(Cc3ccccc3Cl)c2c(=O)n(C)c1=O	3g0c-RUF	P27487
Cn1c2nc[nH]c2c(=O)n(C)c1=O	3kbi-TEP	O00764
Cn1cc(-c2cc3cccnc3[nH]2)c2cc(C(=O)NC(C)(C)CO)ccc21	3fqh-057	P43405
Cn1c(Cc2ccc(C(=[NH2+])[NH3+])cc2)nc2cc(NS(=O)(=O)c3ccccc3)ccc21	1ktt-C02	P00734
CN1CC(CC(C)(C)O)=Nc2c(=O)[nH]c(N)nc21	3h2m-B61	B1UXN2
Cn1cc(CNC(=O)c2cccn2C(=O)C(CC2CCCCC2)[NH2+]CC(=O)[O-])cc1C(=[NH2+])[NH3+]	1nzq-162	P00734
CN1CCN=C1c1cccc(Oc2nc(Oc3cc(C(=[NH2+])[NH3+])ccc3O)c(F)c([NH+](C)CC(=O)[O-])c2F)c1	1fjs-Z34	P00742
Cn1ccnc1-c1cccc(Oc2[nH+]c(Oc3cc(C(=[NH2+])[NH3+])ccc3O)c(F)c([NH+]3CCCC(C(=O)[O-])C3)c2F)c1	1qb1-974	P00760
Cn1c(CNC(=O)c2cccn2C(=O)C(CC2CCCCC2)[NH2+]CC(=O)[O-])ccc1C(=[NH2+])[NH3+]	1o0d-163	P00734
CN1CC[NH+](Cc2csc(C(=O)Nc3ccc(Cl)cc3C(=O)Nc3ccc(Cl)cc3)c2Cl)CC1	1mq5-XLC	P00742
Cn1cnc2c1nc(NCCO)nc2NCc1ccccc1	1w0x-OLO	P24941
Cn1cnc2cc(C#N)c(-c3ccccc3Cl)c(C[NH3+])c21	3ccc-7AC	P27487
CN1CN(C2OC(CO)C(O)C2O)c2nc(N)nc(S)c21	1yry-MSG	P00491
CN1CN(C2OC(COP([O-])(O)OP([O-])(O)O)C(O)C2O)c2nc(N)[nH]c(=O)c21	1ejh-M7G	P63073
CN1CN(C2OC(COP([O-])(O)OP([O-])(O)O)C(O)C2O)c2nc(N)[nH]c(=O)c21	2idv-M7G	P29557
CN1CN(C2OC(COP([O-])(O)OP([O-])(O)O)C(O)C2O)c2nc(N)[nH]c(=O)c21	3d45-7MG	Q8VDG3
CN1CN(C2OC(COP([O-])(O)OP([O-])(O)OP([O-])(O)OCC3OC(n4cnc5c4ncnc5N)C(O)C3O)C(O)C2O)c2nc(N)[nH]c(=O)c21	1ipb-GTA	P06730
CN1CN(C2OC(COP([O-])(O)OP([O-])(O)OP([O-])(O)O)C(O)C2O)c2nc(N)[nH]c(=O)c21	1ipc-MGP	P06730
CN1CN(C2OC(COP([O-])(O)OP([O-])(O)OP([O-])(O)O)C(O)C2O)c2nc(N)[nH]c(=O)c21	1l8b-MGP	P63073
CN1CN(C2OC(COP([O-])(O)OP([O-])(O)OP([O-])(O)O)C(O)C2O)c2nc(N)[nH]c(=O)c21	2vqz-MGT	P31345
CN1C(=[NH2+])[NH2+]C(c2ccccc2)(C23CC4CC(CC(C4)C2)C3)C1=O	3ind-593	P56817
CN1C(=O)C2=C(C1=O)[NH+](Cc1ccccc1C#N)C([NH+]1CCCC([NH3+])C1)=[NH+]2	2i3z-LIR	P14740
Cn1c(=O)c2nc(C=O)c(=O)[nH]c2n(C)c1=O	3h2e-B59	B1UXN2
Cn1c(=O)cc(N2CCCC([NH3+])C2)n(Cc2ccccc2C#N)c1=O	3g0b-T22	P27487
C[N+]1=NC(c2ccc3ccccc3c2)=C2C1=NCN=C2N	3ene-NPZ	P48736
Cn1nc(-c2ccccc2)cc1C(=O)NC(Cc1ccc2ccccc2c1)C(=O)[O-]	3kai-4FI	Q13526
Cn1nc(-c2cccs2)cc1N	3ovn-MPV	Q72498
Cn1nc(C(=O)[O-])c2c1-c1nc(Nc3ccccc3)ncc1CC2	2wip-P49	P24941
Cn1nnnc1SCC1=C(C(=O)[O-])N2C(=O)C(NC(=O)C(O)c3ccccc3)C2SC1	3ny4-SMX	P0C5C1
CNc1ccccc1C(=O)OC1C(=O)C(n2cnc3c2nc(N)[nH]c3=O)OC1COP([O-])(O)OP([O-])(O)NP([O-])(O)O	3lx5-AGO	Q5M586
CNc1cc(Nc2cc(C3CC3)[nH]n2)nc(Nc2ccc(CC#N)cc2)n1	3bhh-5CP	Q13554
CNC1CC[NH+](C2C=CC(=Nc3ncc(Cl)c(Nc4ccccc4S(=O)(=O)NC(C)C)n3)C(OC)=C2)C1	2jkm-BII	Q00944
CNc1nc2c(ncnc2N)n1C1OC(COCC(N)=O)C(O)C1O	3m3z-3F5	P11142
CNc1nccc(-c2ccc(C(=O)NC(C[NH3+])Cc3ccc(Cl)cc3Cl)s2)n1	2gu8-796	P17612
CNc1nccc(-c2cccnc2Oc2c(C)cc(Nc3nc4ccccc4[nH]3)c3ccccc32)n1	3da6-BZ9	P53779
CNc1nc(C)c(-c2ccnc(Nc3ccc(O)cc3)n2)s1	1pxn-CK6	P24941
CNc1nccn1Cc1csc(C(=O)Nc2c(OC)cc(Cl)cc2C(=O)Nc2ccc(Cl)cn2)c1Cl	2p3t-993	P00742
CN(C)c1ccc2c(c1)OC1=CC([NH+](C)C)=CCC1=C2c1ccc(N2C(=O)C=CC2=O)cc1C(=O)[O-]	1nwk-RHO	P68135
CN(C)c1cccc2c1cccc2S(=O)(=O)NC(Cc1ccc(OS(=O)(=O)c2cccc3c2cccc3[NH+](C)C)cc1)C(=O)[O-]	1jg0-DDT	P0A884
CN(C)c1cccc2c1cccc2S(=O)(=O)NC(CCC[NH2+]C(=[NH2+])[NH3+])C(=O)N1CCCCC1CCC(=O)c1nccs1	1a4w-ANS_DAR_2EP_KTH	P00734
CN(C)c1cccc2c1cccc2S(=O)(=O)N(C)CC(=O)[O-]	2xvq-9DS	P02768
CN(C)c1ccc(-c2sc3cc(O)ccc3[n+]2C)cc1	2j3q-TFL	P04058
CN(Cc1ccccc1)C(=O)c1[nH]c(-c2cccc(Cl)c2)nc1C(=O)[O-]	2xpb-4GE	Q13526
CN(C)c1ccc(C(c2ccccc2)=C2C=CC(=[N+](C)C)C=C2)cc1	3hti-MGR	Q79SH7
CN(C)c1ccc([NH+]=Nc2ccccc2C(=O)[O-])cc1	3keg-MRE	Q9I5F3
CN(C)c1ccc(N=Nc2ccccc2C(=O)[O-])cc1	2v9c-MRE	Q9I5F3
CN(C)c1ccc(O)c2c1CC1CC3C([NH+](C)C)C(=O)C(=C(N)[O-])C(=O)C3(O)C([O-])=C1C2=O	2wq5-MIY	P15445
CN(Cc1cnc2nc(N)nc(N)c2n1)c1ccc(C(=O)NC(CCC(=O)[O-])C(=O)[O-])cc1	1axw-MTX	P0A884
CN(C)c1nc2c(c(Br)c(Br)c(Br)c2Br)n1CC(=O)[O-]	3kxh-K66	P28523
CN(C)c1nc2ccc1CCCCn1cc(c3ccccc31)C1=C(c3cn(c4ccccc34)CCC2)C(=O)NC1=O	2ow3-BIM	P49841
CN(C)c1ncnc2nc[nH]c21	3hyz-42C	P07900
C[N+](C)(C)CCCCCCCCCC[n+]1c2cc(N)ccc2c2ccc(N)cc2c1-c1ccccc1	1j07-DCU	P21836
C[N+](C)(C)CCCCCCCCCC[N+](C)(C)C	2xud-DME	P21836
C[N+](C)(C)CCCN1C(=O)C2C3CCCN3C(c3cc(-c4ccc(Cl)s4)on3)C2C1=O	2jkh-BI7	P00742
C[N+](C)(C)CCCN1C(=O)C2C3CCCN3C(c3ccc(C(=[NH2+])[NH3+])cc3)C2C1=O	2bok-784	P00742
C[N+](C)(C)CCOP([O-])(O)O	1h8p-PC	P02784
C[N+](C)(C)CCOP([O-])(O)O	1o72-PC	P07845
C[N+](C)(C)CCOP([O-])(O)OP([O-])(O)OCC1OC(n2ccc(N)nc2=O)C(O)C1O	1jyl-CDC	Q97QE9
C[N+](C)(C)CCOP([O-])(O)OP([O-])(O)OCC1OC(n2ccc(N)nc2=O)C(O)C1O	3hl4-CDC	P19836
C[N+](C)(CCCS([O-])(O)O)Cc1ccccc1	1tp7-DMX	Q82122
C[N+](CCC([NH3+])CC(=O)NC1C=CC(N2C=CC([NH3+])(O)NC2=O)OC1C(=O)[O-])=C([NH3+])[NH3+]	1wn6-BST	P0C2P0
C[N+](CCC([NH3+])CC(=O)NC1C=CC(n2ccc(O)nc2=O)OC1C(=O)[O-])=C([NH3+])[NH3+]	2z3h-BLO	P0C2P0
CN(CC(N)=O)C(=O)c1nc(-c2ccccc2)[nH]c1C(=O)[O-]	2xpa-4G5	Q13526
CN(CCOc1ccc(CC2SC(=O)NC2=O)cc1)c1ccccn1	1zgy-BRL	P37231
CN(CCOc1ccc(CC2SC(=O)NC2=O)cc1)c1ccccn1	3cs8-BRL	P37231
CN(C)C(=O)C1CCC(NC(=O)c2cc3cc(Cl)ccc3[nH]2)C(NC(=O)c2nc3c(s2)C[NH+](C)CC3)C1	2ei8-DT8	P00742
C=NC(=O)c1cc2ccc(-c3cc(Nc4ccnc(N)n4)ccc3O)cc2s1	3ka0-MK3	P49137
CNC(=O)C1Cc2ccc(NS([O-])(O)O)cc2CN1C(=O)OC(C)(C)C	2f6t-1C2	P18031
CNC(=O)C1Cc2ccc(NS([O-])(O)O)cc2CN1C(=O)OC(C)(C)C	2f6y-ENT	P18031
CNC(=O)c1cccc(CN2C(COc3ccccc3)C(O)C(O)C(COc3ccccc3)N(Cc3ccccc3)S2(=O)=O)c1	1g2k-NM1	P04587
CNC(=O)c1ccc(C)c(Nc2ncnc3c2cnn3-c2ccccc2)c1	3l8x-N4D	Q16539
CNC(=O)C1CCCN1C(=O)C1CCCN1C(=O)C(C)[NH3+]	3cww-ALA_PRO_PRO_ALA	P14735
CN(C(=O)C1CCCN1C(=O)C([NH3+])CC1CCCCC1)C(CCC[NH+]=C(N)[NH3+])C(=O)[O-]	1eb1-ALC_PRO_MMO	P00734
CNC(=O)c1c(C)[nH]c(C=C2C(=O)Nc3ccc(Cl)cc32)c1C	2jav-5Z5	P51955
CNC(=O)c1cc(Oc2ccc3nc(Nc4ccc(Cl)c(C(F)(F)F)c4)[nH]c3c2)ccn1	2qu5-276	P35968
CNC(=O)c1cc(Oc2ccc3oc(Nc4ccc(Cl)c(OCC5CCC[NH+]5C)c4)nc3c2)ccn1	2qu6-857	P35968
CNC(=O)c1cc(Oc2ccc(NC(=O)Nc3cc(C(C)(C)C)nn3-c3ccc4ncccc4c3)c(F)c2)ccn1	3qrj-919	P00519
CNC(=O)c1cc(Oc2ccc(NC(=O)Nc3ccc(Cl)c(C(F)(F)F)c3)cc2)ccn1	1uwh-BAX	P15056
CNC(=O)c1nn(C)c2c1ccc1cnc(NC3CCN(S(C)(=O)=O)CC3)nc21	2wxv-WXV	P24941
CNC(=O)c1nn(C)c2c1C(C)(C)Cc1cnc(Nc3ccc(N4CC[NH+](C)CC4)cc3)nc1-2	2wih-P48	P24941
CNC(=O)C(Cc1ccccc1)NC(=O)C(CC(C)C)C(CSc1cccs1)C(=O)NO	1dth-BAT	P15167
CNC(=O)C(Cc1ccccc1)NC(=O)C(CC(C)C)C(CSc1cccs1)C(=O)NO	1jk3-BAT	P39900
CNC(=O)C(Cc1ccccc1)NC(=O)C(CC(C)C)C(CSc1cccs1)C(=O)NO	1mmb-BAT	P22894
CNC(=O)C(Cc1ccccc1)NC(=O)C(CC(C)C)C(CSc1cccs1)C(=O)NO	1rm8-BAT	P51512
CNC(=O)C(Cc1ccccc1)NC(=O)C(CC(C)C)C(CSc1cccs1)C(=O)NO	2rjq-BAT	Q9UNA0
CNC(=O)C(Cc1ccccc1)NC(=O)C(CC(=O)NO)CC(C)C	1mnc-PLH	P22894
CNC(=O)C(Cc1c[nH]c2ccccc12)NC(=O)C(CC(=O)NO)CC(C)C	2dw0-GM6	Q90282
CNC(=O)C(Cc1c[nH]c2ccccc12)NC(=O)C(CC(=O)NO)CC(C)C	2e3x-GM6	Q7LZ61
CNC(=O)C(C)C1C(=O)C(=C([O-])C=CC(C)=CC(C)C2OC3(C)OC(C=CC34CO4)C2C)C(=O)N1C1CCC(O)C(C)O1	2ppb-STD	Q9Z9H6
CN(C(=O)CCCn1c(N)nc2cc(Cl)ccc21)C1CCCCC1	3msk-EV4	P56817
CNC(=O)CCC(=O)NC(Cc1ccccc1)C(O)CN(CC1CC1)S(=O)(=O)c1cccc(OC)c1	2psu-MUU	O38732
CNC(=O)CCC(=O)NC(Cc1ccccc1)C(O)CN(CC1CC1)S(=O)(=O)c1ccco1	2psv-MUV	O38732
CNC(=O)C(CCS(C)=O)NC(C)=O	3hci-RSM	B0RWG5
CN(C(=O)CC[NH+]1Cc2cc(C(=O)c3ccccc3)ccc2[NH+]=C1[NH3+])C1CCCCC1	2q11-XX4	P56817
CNC(=O)C(NC(=O)C(CCCc1ccccc1)C(C)N(O)C=O)C(C)(C)C	2wo9-023	P39900
CNC(=O)C(NC(=O)C(CC(C)C)C(CNC(=O)c1nccs1)C(=O)NO)C(C)(C)C	2w15-WR2	P83512
CNC(=O)C(NC(=O)C(CC(C)C)CN(O)C=O)C(C)(C)C	1gkc-BUM_STN	P14780
CNC(=O)C(NC(=O)C(CC(C)C)CN(O)C=O)C(C)(C)C	1gkd-STN_BUM	P14780
CNC(=O)C(NC(=O)C(CC(C)C)=C(O)C(=O)NO)C(C)(C)C	1r55-097	Q9BZ11
CNC(=O)C(NC(=O)C(CC(C)C)=C(O)C(=O)NO)C(C)(C)C	2jih-097	Q9UHI8
CNC(=O)C(NC(=O)C(OCc1ccc(-c2cccnc2)cc1)C(O)C(O)C(OCc1ccc(-c2cccnc2)cc1)C(=O)NC(C(=O)NC)C(C)C)C(C)C	1ec2-BEJ	P03366
CNC(=O)C(NC(=O)C(OCc1ccc(-c2ccsc2)cc1)C(O)C(O)C(OCc1ccc(-c2ccsc2)cc1)C(=O)NC(C(=O)NC)C(C)C)C(C)C	1ec1-BEE	P03366
CNC(=O)CSc1nc2c(c(Br)c(Br)c(Br)c2Br)n1C	3kxm-K74	P28523
CN(C(=O)N1CC(c2cc(F)ccc2F)=CC1c1ccccc1)C1CC[NH2+]CC1	2fky-N2T	P52732
CN(C(=O)N1CC(c2cc(F)ccc2F)=CC1(CO)c1ccccc1)C1CC[NH+](C)CC1F	3cjo-K30	P52732
CNC(=O)N(c1cccc(-c2sc(C(=O)[O-])c(OCC(=O)[O-])c2Br)c1)C1CCCCC1	2zmm-35B	P18031
CNC(=O)NC(=[NH2+])[NH2+]CCCC1NC(=O)C(C)NC(=O)CC(C(=O)[O-])NC(=O)CC(C(=O)[O-])NC(=O)C(Cc2ccccc2)N(C)C1=O	1wb0-RAG	Q13231
CN(C)S(=O)(=O)c1ccc2c(c1)C(=Cc1cc3c([nH]1)CCCC3)C(=O)N2	2wel-K88	Q13557
C[NH+]1CC2(C1)CNC(=O)c1c3c([nH]c12)-c1cc(-c2ccccc2F)ncc1CC3	3m2w-L8I	P49137
C[NH+]1CCc2nc(C(=O)N3CCN(S(=O)(=O)c4ccc5cc(Cl)ccc5c4)CC3C(N)=O)sc2C1	1v3x-D76	P00742
C[NH+]1CCc2nc(C(=O)NC3CCCCC3NC(=O)C3=NC4=CC=C(Cl)CC4=C3)sc2C1	2ei6-D92	P00742
C[NH+]1CCC(c2c(O)cc(O)c3c(=O)cc(-c4ccccc4Cl)oc32)C(O)C1	3blr-CPB	P50750
C[NH+]1CCCC(ON=Cc2ccc(C(N)=[NH2+])cc2)C1	3a7y-O13	P00760
C[NH+]1CCC(ON=Cc2ccc(C(N)=[NH2+])cc2)CC1	3a7z-O14	P00760
C[NH+]1CCN(c2ccccc2CN=NC(N)=S)CC1	3gk2-27A	P02638
C[NH+]1CCN(c2cccc(-c3cnn4c3N=CC(c3ccc(O)cc3)C4[NH3+])c2)CC1	3mpm-5LK	P06239
C[NH+]1CCN(c2cnc3cc(C(F)(F)F)cc(-c4cccc(O)c4)c3n2)CC1	3f66-IHX	P08581
C[NH+]1CCN(Cc2ccc(C(=O)Nc3cccc(Nc4nccc(-c5cccnc5)n4)c3)cc2)CC1	1y57-MPZ	P12931
C[NH+]1CCN(CCCN2c3ccccc3Sc3ccc(C(F)(F)F)cc32)CC1	1ctr-TFP	P62158
C[NH+]1CCN(CCCN2c3ccccc3Sc3ccc(C(F)(F)F)cc32)CC1	1wrk-TFP	P63316
C[NH+]1CCN(CCOc2cc3ncnc(Nc4c5c(ccc4Cl)OCO5)c3c(OC3CCOCC3)c2)CC1	2h8h-H8H	P12931
C[NH+]1CCN(C(=O)c2ccc(Nc3ncc4c(n3)-c3ccc(Cl)cc3C(c3c(F)cccc3F)=NC4)cc2)CC1	3h10-97B	O14965
C[NH2+]C1CC2OC(C)(C1OC)n1c3ccccc3c3c4c(c5c6ccccc6n2c5c31)C(=O)NC4	1q3d-STU	P49841
C[NH2+]C1CC2OC(C)(C1OC)n1c3ccccc3c3c4c(c5c6ccccc6n2c5c31)C(=O)NC4	1stc-STU	P00517
C[NH2+]C1CC2OC(C)(C1OC)n1c3ccccc3c3c4c(c5c6ccccc6n2c5c31)C(=O)NC4	1u59-STU	P43403
C[NH2+]C1CC2OC(C)(C1OC)n1c3ccccc3c3c4c(c5c6ccccc6n2c5c31)C(=O)NC4	2buj-STU	O75716
C[NH2+]C1CC2OC(C)(C1OC)n1c3ccccc3c3c4c(c5c6ccccc6n2c5c31)C(=O)NC4	2dq7-STU	P06241
C[NH2+]C1CC2OC(C)(C1OC)n1c3ccccc3c3c4c(c5c6ccccc6n2c5c31)C(=O)NC4	2gcd-STU	Q9JLS3
C[NH2+]C1CC2OC(C)(C1OC)n1c3ccccc3c3c4c(c5c6ccccc6n2c5c31)C(=O)NC4	2hw7-STU	Q9HBH9
C[NH2+]C1CC2OC(C)(C1OC)n1c3ccccc3c3c4c(c5c6ccccc6n2c5c31)C(=O)NC4	2pzy-STU	P49137
C[NH2+]C1CC2OC(C)(C1OC)n1c3ccccc3c3c4c(c5c6ccccc6n2c5c31)C(=O)NC4	3a4o-STU	P07948
C[NH2+]C1CC2OC(C)(C1OC)n1c3ccccc3c3c4c(c5c6ccccc6n2c5c31)C(=O)NC4	3a62-STU	P23443
C[NH2+]C1CC2OC(C)(C1OC)n1c3ccccc3c3c4c(c5c6ccccc6n2c5c31)C(=O)NC4	3fme-STU	P52564
C[NH2+]C1CC2OC(C)(C1OC)n1c3ccccc3c3c4c(c5c6ccccc6n2c5c31)C(=O)NC4	3hmo-STU	P33981
C[NH2+]C1CC2OC(C)(C1OC)n1c3ccccc3c3c4c(c5c6cc(O)ccc6n2c5c31)C(=O)NC4	2hy8-1ST	Q13153
C[NH2+]C1CC2OC(C)(C1OC)n1c3ccccc3c3c4c(c5c6c(n2c5c31)CCCC6)C(=O)NC4	2hz4-4ST	P00519
C[NH2+]C1CC2OC(C)(C1OC)n1c3ccccc3c3c4c(c5c6c(n2c5c31)CCCC6)C(=O)NC4	2j0k-4ST	Q00944
C[NH2+]C1CC2OC(C)(C1OC)n1c3ccccc3c3c4c(c5c6c(n2c5c31)CCCC6)C(=O)NC4	2j0m-4ST	Q00944
C[NH2+]C1CC(C)S(=O)(=O)c2sc(S(N)(=O)=O)cc21	1cin-MTS	P00918
C[NH2+]C1CN(c2cccc(OC)c2)S(=O)(=O)c2sc(S(N)(=O)=O)cc21	1bnv-AL7	P00918
C[NH2+]C1C(O)C(O)C(C)OC1OC1C2=CC#CC3OC3(C3COC(=O)O3)C#CC2=CC1OC(=O)c1c(O)ccc2c(C)cc(OC)cc21	1nco-CHR	P0A3R9
C[NH2+]Cc1ccccc1-c1cccs1	3fud-692	P09960
C[NH2+]C(Cc1ccccc1)C(=O)N1CCCC1C(=O)NCC1CCC([NH3+])CC1	1tom-MIN	P00734
C[NH2+]CCNS(=O)(=O)c1cccc2cnccc21	1yds-IQS	P00517
C[NH2+]CC(O)c1ccc(O)c(O)c1	2hkk-ALE	P00918
C[NH+](C)C1CCc2cc(N3CCC(NS(=O)(=O)c4ccc5cc(Cl)ccc5c4)C3=O)ccc21	2y7z-C0Z	P00742
C[NH+](C)C1CCc2cc(N3CCC(NS(=O)(=O)c4ccc5cc(Cl)ccc5c4)C3=O)ccc21	2y80-439	P00742
C[NH+](C)c1cccc2c1cccc2S(N)(=O)=O	1okl-MNS	P00918
C[NH+](C)C1C([O-])=C(C#N)C(=O)C2([O-])C(=O)CC(C3(C)OC(=O)c4c3c(Cl)ccc4[O-])CC12	2x6o-2TC	P0ACT4
C[NH+](C)C1C(O)=C(C(N)=O)C(=O)C2C(O)=C3C(=O)c4c(O)cccc4CC3CC21	1n5q-TNC	Q53908
C[NH+](C)C1C(O)=C(C(N)=O)C(=O)C2(O)C(O)=C3C(=O)c4c(O)cccc4C(C)(O)C3CC12	2trt-TAC	P0ACT4
C[NH+](C)C1C(O)=C(C(N)=O)C(=O)C2(O)C(O)=C3C(=O)c4c(O)cccc4C(C)(O)C3CC12	2uxo-TAC	Q9AIU0
C[NH+](C)C1C(O)=C(C(N)=O)C(=O)C2(O)C(O)=C3C(=O)c4c(O)cccc4C(C)(O)C3CC12	2vke-TAC	P0ACT4
C[NH+](C)C1C(O)=C(C(N)=O)C(=O)C2(O)C(O)=C3C(=O)c4c(O)ccc(Cl)c4C(C)(O)C3CC12	1bjy-CTC	P0ACT4
C[NH+](C)C1C(O)=C(C(N)=O)C(=O)C2(O)C(O)=C3C(=O)c4c(O)ccc(Cl)c4C(C)(O)C3CC12	2tct-CTC	P0ACT4
C[NH+](C)C1C(=O)C(=C(N)[O-])C(=O)C2(O)C([O-])=C3C(=O)c4c(O)ccc(I)c4CC3CC12	2xb5-I7T	P0ACT4
C[NH+](C)C1C(=O)C(=C(N)[O-])C(=O)C2(O)C([O-])=C3C(=O)c4c(O)ccc(I)c4CC3CC12	2y6q-I7T	Q93L51
C[NH+](C)C1C(=O)C(=C(N)[O-])C(=O)C2(O)C(=O)CC(C3(C)OC(=O)c4c3c(Cl)ccc4[O-])CC12	2x9d-ITC	P0ACT4
C[NH+](C)Cc1nc2c3cc(C=CC4CC4)ccc3sc2c(=O)[nH]1	3jxw-LXG	P11309
C[NH+](C)Cc1nccn1-c1ccc(N2CCC(NS(=O)(=O)CCc3ccc(Cl)s3)C2=O)c(F)c1	2vh0-GSI	P00742
C[NH+](C)CCCCC([NH3+])C(=O)[O-]	2r58-MLY	Q9VHA0
C[NH+](C)CCCCC([NH3+])C(=O)[O-]	3lh0-MLY	Q12888
C[NH+](C)CCC(CSc1ccccc1)Nc1ccc(S(=O)(=O)NC(=O)c2ccc(N3CC[NH+](Cc4cccc(-c5ccccc5)c4)CC3)cc2)cc1[N+](=O)[O-]	3inq-X0J	Q07817
C[NH+](C)CCCN1c2ccccc2Sc2ccc(Cl)cc21	3apx-Z80	P19652
C[NH+](C)CCCn1cc(C2=C(c3c[nH]c4ccccc34)C(=O)NC2=O)c2ccccc21	2bik-BI1	P11309
C[NH+](C)CCC[NH+](C)C1CCN(C(=O)c2[nH]c3cc(Cl)ccc3c2-c2c(-c3ccccc3)ncn2Cc2ccc(Cl)cc2)C1	3lbj-WW8	O15151
C[NH+](C)CCCOc1ccc(-c2nc3cccc4c3n2CCNC4=O)cc1	3ki1-G9F	Q5EK40
C[NH+](C)CCNC(=O)NCC1CCC2C(c3ccccc3)Nc3ccc(C(F)(F)F)cc3C2O1	3l9h-EMQ	P52732
C[NH+](C)CC(O)COc1ccc(Nc2cc(Nc3cc(C(F)(F)F)ccc3F)ncn2)cc1	1v1k-3FP	P24941
C[NH+](C)CC(=O)Nc1ccc2c(c1O)C(=O)C1=C(O)C3(O)C(=O)C(C(N)=O)=C(O)C([NH+](C)C)C3CC1C2	1ork-ATC	P0ACT4
C[NH+](CCO)c1ncnc2oc(-c3ccccc3)c(-c3ccccc3)c21	2brg-DFY	O14757
CNS(=O)(=O)c1ccc2cccc(CCNC(C)=O)c2c1	3ox1-695	P16083
CNS(=O)(=O)c1ccc(-c2ccc(C=C3SC(=[NH2+])NC3=O)o2)cc1	2uzb-C75	P24941
CNS(=O)(=O)c1ccc(Nc2nccc(-c3c[nH+]c(C)n3C3CC3)n2)cc1	2w06-FRV	P24941
CNS(=O)(=O)c1ccc(NC=C2C(=O)Nc3ccccc32)cc1	1ke5-LS1	P24941
CNS(=O)(=O)Cc1ccc(NN=C2C(=O)Nc3ccc4ncsc4c32)cc1	1ke6-LS2	P24941
COc1cc2c(cc1Cl)C(c1cccc(Br)c1)=NCC2	2waj-SNB	P53779
COc1cc2c(cc1OC)C1CC([NH3+])C(N3CC(CF)CC3=O)C[NH+]1CC2	3kwf-B1Q	P27487
COc1cc2c(cc1O)CCC1C3CCC(OS(N)(=O)=O)C3(C)CCC21	2x7s-WZC	P00918
COc1cc2c(cc1OCCC[NH+]1CCCCC1)ncnc2Nc1c2c(ccc1Cl)OCO2	2vwu-7X1	P54760
COc1cc2c(cc1OCCC[NH+]1CCOCC1)ncnc2Nc1ccc(NC(=O)c2ccccc2)cc1	2vrx-447	Q6DE08
COc1cc2c(cc1OCCC[NH+](C)CCO)[nH+]cc(C#N)c2Nc1ccc(Sc2nccn2C)c(Cl)c1	3f5p-741	P08069
COc1cc2c(cc1OCC(O)C[NH+]1CCCCC1)ncnc2Nc1cnc(NC(=O)c2ccccc2)nc1	2c6e-HPM	O14965
COc1cc2c(cc1OC)C(=O)n1c-2cc2cc(O)ccc21	3ox2-79X	P16083
COc1cc2c(cc1OS(N)(=O)=O)CCC1C3CCC(CC#N)C3(C)CCC21	3bet-CTF	P00918
COc1cc2c(cc1OS(N)(=O)=O)CCC1C3CCC(O)C3(C)CCC21	2x7u-WZA	P00918
COC1CC2C=CCC(CC(OC)C3(CO3)C(OC)CC(OC)C(C)C(C(C)C(O)C(C)CCC3CC(OC)CC(C)O3)OC(=O)C=CC(C)=CC1O)O2	3m6g-LO3	P68135
COc1cc2c(nc1OC)c(-c1cc3c(nccc3Cl)[nH]1)cn2C	3lvp-PDR	P08069
COc1cc2nc(-c3cc(F)ccc3O)nc(NC3C[NH2+]CC3C(C)(C)O)c2cc1OC	2xbj-XBJ	O96017
COc1cc2nccc(Oc3ccc4c(c3)OCCN4C(=O)Nc3ccc(Cl)cc3)c2cc1OC	2rl5-2RL	P35968
COc1cc2nc(N3CCc4c(ccn(CC5CC5)c4=O)C3)[nH]c(=O)c2cc1OCC1C=C1	2w0v-LZR	P43889
COc1cc2nc(N3CCN(C(=O)c4ccco4)CC3)nc(N)c2cc1OC	3owx-XRA	P16083
COc1cc2ncnc(N3CCc4cccc(S(=O)(=O)N5CC[NH+](C)CC5)c4C3)c2cc1OC	2o8h-227	Q9QYJ6
COc1cc2ncnc(N3CCC(Oc4ccc5ccccc5c4)C3)c2cc1OC	2ovv-PFH	Q9QYJ6
COc1cc2ncnc(N3CCC(Oc4cnc5ccccc5n4)C3)c2cc1OC	2ovy-PFJ	Q9QYJ6
COc1cc2ncnc(Nc3cccc(O)c3)c2cc1OC	1di8-DTQ	P24941
COc1cc2ncnc(Nc3cccc(O)c3)c2cc1OC	3nyv-DTQ	Q9BJF5
COc1cc2ncnc(Nc3cccc(SC)c3)c2cc1OC	1di9-MSQ	Q16539
COc1ccc2c(c1)c(C=C1Oc3cc(O)cc(O)c3C1=O)c1n2CC[NH2+]C1	3mjw-WYF	P48736
COc1ccc2c(c1)c(CC(=O)[O-])c(C)n2C(=O)c1ccc(Cl)cc1	1s2a-IMN	P42330
COc1ccc2c(c1)c(CC(=O)[O-])c(C)n2C(=O)c1ccc(Cl)cc1	2zb8-IMN	Q8N8N7
COc1ccc2c(c1)c(CC(=O)[O-])c(C)n2C(=O)c1ccc(Cl)cc1	3fo7-IMN	D0VX11
COc1ccc2c(c1)N(C(=O)OC(C)C)C(CSC)C(=S)N2	2ic3-HBY	P03366
COc1ccc2c(c1)OCCC=CCCCCN(CC(O)C(Cc1ccccc1)NC(=O)OC1COC3OCCC13)S2(=O)=O	3i6o-GR6	P03367
COc1ccc2c(c1)OC(OC1OC(CO)C(O)C(O)C1O)C(=O)N2O	1h49-BGC_HBO	P49235
COc1ccc2c(c1)OC(OC1OC(CO)C(O)C(O)C1O)C(=O)N2O	3ais-BGC_HBK	Q1XH05
COc1ccc2c(c1)S(=O)(=O)NC(c1c(O)c(-c3ccccc3)nn(CCC(C)C)c1=O)=N2	3bsc-2PD	P26663
COc1cc(-c2ccc3c(c2)NC(=O)C3=Cc2ccc[nH]2)ccc1O	2ayp-43A	O14757
COc1ccc2cc(C(C)C(=O)[O-])ccc2c1	3nt1-NPS	Q05769
COc1cc(-c2cc(C)nc(N)n2)c(Cl)cc1Cl	3rlp-3RP	P07900
COc1cc(-c2ccc(=O)[nH]n2)ccc1OC(F)F	1xor-ZAR	Q08499
COc1ccc2c(CC(=O)[O-])coc2c1	3n3l-MS0	P14324
COc1ccc2c([nH]1)c(CCNC(=O)c1ccco1)c1c3ncccc3cn21	3ox3-4X4	P16083
COc1ccc2[nH]c(I)c(CCNC(C)=O)c2c1	2qx8-ML2	P16083
COc1ccc2sc3c(c2c1)NCC(C[NH3+])NC3=O	3fz1-B98	P24941
COc1cccc2c1C(=O)c1c(O)c3c(c(O)c1C2=O)CC(O)(C(C)=O)CC3OC1CC([NH3+])C(O)C(C)O1	3f8f-DM1	A2RI36
COc1ccc(C2(C34CC5CC(CC(C5)C3)C4)[NH+]=C([NH3+])N(C)C2=O)cc1C	3ine-X17	P56817
COc1ccc(-c2cc3c(C)nc(N)nc3n(C3CCC(OCCO)CC3)c2=O)cn1	3ml9-ML9	P48736
COc1ccc(-c2ccc3sc(C(N)[NH3+])cc3c2)cc1OC	3lc3-IYX	P00740
COc1ccc(-c2ccccc2)cc1N1CC(=O)NS1(=O)=O	2bgd-T1D	P18031
COc1ccc(-c2cc(N3CC([NH3+])C(c4cc(F)c(F)cc4F)C3)ncn2)cn1	2qjr-PZF	P27487
COc1ccc(-c2c(C)[nH]nc2-c2ccc(O)cc2O)cc1	2zdx-P4A	Q16654
COc1cc(Cc2cnc(N)nc2N)cc(OC)c1OC	2w3a-TOP	P00374
COc1ccc(C2CNC(=O)C2)cc1OC1CCCC1	1ro6-ROL	Q07343
COc1ccc(C2CNC(=O)C2)cc1OC1CCCC1	1tbb-ROL	Q08499
COc1ccc(C2CNC(=O)C2)cc1OC1CCCC1	3g4k-ROL	Q08499
COc1ccc(C2CNC(=O)NC2)cc1OC1CC2CCC1C2	3kkt-0CP	Q07343
COc1ccc(-c2[nH]c3nc(N)[nH]c(=O)c3c2C#N)cc1	3jqe-DX8	Q581W1
COc1ccc(C2=NNC(=O)C2=NNc2ccc(Cl)cc2)cc1OC	3l1s-Z92	P49841
COc1ccc(C2=N[NH+](C3CCC3)c3ncnc(N)c32)cc1OC	3en5-KS4	P00523
COc1ccc(-c2oc3ncnc(NCCO)c3c2-c2ccc(OC)cc2)cc1	2br1-PFP	O14757
COc1cc(CC2SC(=O)NC2=O)ccc1Oc1ccc(C#N)cc1C(F)(F)F	3k6p-5FB	P11474
COc1ccccc1-c1ccc(C(=O)[O-])o1	2xp3-B21	Q13526
COc1ccccc1-c1cc(Cl)nc(N)n1	2xdx-WOE	P07900
COc1ccccc1-c1cc(Cl)nc(N)n1	3r4m-WOE	P07900
COc1ccccc1C(=Cc1coc2nc(N)nc(N)c12)C1CC1	3nxt-D2E	P00374
COc1ccccc1C(=Cc1coc2nc(N)nc(N)c12)C(C)C	3nxo-D2B	P00374
COc1ccccc1C(=Cc1coc2nc(N)nc(N)c12)CC(C)C	3nxx-D2D	P00374
COc1ccccc1C(C)Cc1coc2nc(N)nc(N)c12	3k47-D09	P00375
COc1ccc(C=C2c3cc(N)ccc3NC2=O)cc1	2x2l-X2L	P07949
COc1ccc(Cc2ccc(NC(N)=O)cc2)c(F)c1-c1cccc([N+](=O)[O-])c1	3iad-15X	Q08499
COc1cccc(-c2cn(-c3ccc(C[NH+]4CCC(O)CC4)cc3)c3ncnc(N)c23)c1	1yol-S03	P12931
COc1ccc(CC2C(=O)C(O)C(O)CC2(O)C(=O)[O-])cc1	2xb8-XNW	P0A4Z6
COc1ccc(CC2C(=O)C(O)C(O)CC2(O)C(=O)[O-])cc1	2xb9-XNW	Q48255
COc1cccc(-c2nc3c(cccc3C(N)=O)[nH]2)c1	1efy-BZC	P26446
COc1ccc(Cc2nccc3cc(OC)c(OC)cc32)cc1OC	3iak-EV1	Q08499
COc1ccc(C=C2SC(=O)N(CC(=O)[O-])C2=O)cc1OCC(=O)[O-]	3fx4-FX4	P50578
COC1C=CC=C(C)C(=O)NC2=CC(=O)C(NCC[NH+]3CCCC3)=C(CC(C)CC(OC)C(O)C(C)C=C(C)C1OC(N)=O)C2=O	3q5l-KX2	Q4Q4I6
COc1ccc(CCC(=O)[O-])cc1	3p6e-ZGC	P15090
COc1ccc(CCC(=O)[O-])cc1C	3p6d-ZGB	P15090
COc1ccc(CC([NH3+])C(=O)[O-])cc1	3qtc-0A1	Q8PWY1
COc1ccc(C(C)=NOC(N)=O)cc1OC1CCCC1	1xlz-FIL	Q07343
COc1ccc(CC(=O)Nc2cn(C3CC(NC(C)=O)C3)cn2)cc1	3ig7-EFP	P24941
COc1ccc(CC(=O)Nc2cn(C3CC(O)C3)cn2)cc1	3igg-EFQ	P24941
COc1cccc(N2C=Cc3cc(S(N)(=O)=O)sc3S2(=O)=O)c1	1bn3-AL6	P00918
COc1cccc(N2CCc3cc(S(N)(=O)=O)sc3S2(=O)=O)c1	1bnn-AL1	P00918
COc1cccc(N2C(C[NH+]3CCOCC3)=Cc3cc(S(N)(=O)=O)sc3S2(=O)=O)c1	1i8z-INL	P00918
COc1cccc(Nc2nc(N3CCS(=O)(=O)CC3)nc3c2cnn3C)c1	3nzs-NZS	P48736
COc1ccc(CNC(=O)Nc2ncc([N+](=O)[O-])s2)cc1	1q5k-TMU	P49841
COc1ccc(C=NNc2[nH]nc(C)c2C(=O)Nc2cccc(NC(C)=O)c2)cc1	3fdn-MMH	O14965
COc1cccc(OC)c1C=Cc1cc(Br)c(N)c(Br)c1	3imw-IW6	P02766
COc1cccc(OC)c1C(=O)NC1C(=O)N2C1SC(C)(C)C2C(=O)[O-]	3kp4-MII	Q5HLN6
COc1ccc(CO)cc1O	2yea-2A9	P07900
COC1CC(C)C(OC)C2=CC(=O)C=C(NC(=O)C(C)=CC=CC(C)C(OC(N)=O)C(C)=CC(C)C1OC)C2=O	2vwc-BC2	P02829
COc1ccc(C(=O)N2CCC3(CC2)C(=O)N(CC(=O)NCCc2ccc(Cl)cc2Cl)CN3c2ccccc2)c(OC)c1	3ii4-3II	P66004
COC1CCC(C(=O)Nc2cc(-c3ccnc(Nc4ccc(F)cc4)c3)ccn2)CC1	2exc-JNK	P53779
COc1ccc(C(=O)Nc2ccccc2)cc1NC(=O)CCSc1ncnc(N)c1Br	3dj5-AK5	P97477
COc1ccc(CSc2nnc(-c3ccc4c(c3)OCO4)o2)cc1F	3f7z-34O	P49841
COc1cccc(S(=O)(=O)N(Cc2cccs2)CC(O)C(Cc2ccccc2)NC(=O)c2cccc(F)c2C)c1	2qi0-MZ3	O38732
COc1cccc(S(=O)(=O)N(Cc2cccs2)CC(O)C(Cc2ccccc2)NC(=O)c2ccc(O)c(O)c2)c1	2qi1-MZ4	O38732
COc1cc(C)c(S(=O)(=O)NC(CC(=O)[O-])C(=O)NC(Cc2ccc(C(=[NH2+])[NH3+])cc2)C(=O)N2CCCCC2)c(C)c1C	1k1n-CCR	P00760
COc1cc(C)c(S(=O)(=O)NC(CC(=O)[O-])C(=O)NC(Cc2ccc(C(=[NH2+])[NH3+])cc2)C(=O)N2CCCCC2)c(C)c1C	1ypk-CCR	P00734
COc1cc(C(F)(F)C(=O)N2CCCCC2C(=O)OC(CCCc2ccccc2)CCCc2cccnc2)cc(OC)c1OC	1j4r-001	P62942
COc1cc(Cl)cc(C(=O)Nc2ccc(Cl)cn2)c1NC(=O)c1scc(C[N+](C)=C2NCCO2)c1Cl	1mq6-XLD	P00742
COC1CCC(n2c3nc(N)nc(C)c3cc(-c3cc[nH]n3)c2=O)CC1	3pre-3RE	P48736
COc1ccc(N2CCC([NH3+])C(c3cccc(C)c3)C2)cc1OC	2jid-GVB	P27487
COc1ccc(N2CC(O)c3cc(S(N)(=O)=O)sc3S2(=O)=O)cc1	1bnt-AL2	P00918
COc1ccc(-n2cnc3ccc(-c4n[nH]c(=S)o4)cc32)cc1	3f88-3HT	P49841
COc1cc(CN2C(=O)N(Cc3ccc(O)c(OC)c3)N(C(=O)CCc3ccc(O)cc3)CC(O)C2Cc2ccccc2)ccc1O	2a4f-AAU	Q9Q2G8
COc1ccc(-n2nc(C(F)(F)F)c3c2C(=O)N(c2ccc(C4(C[NH+]5CCCC5)CC4)cc2)CC3)cc1	3cs7-LG0	P00742
COc1cc(C(Nc2ccc(C(=[NH2+])[NH3+])cc2)C(=O)NC(C(=O)[O-])c2ccccc2)ccc1OCc1ccccc1	1w7x-413	P08709
COc1cc(CNc2ccc(C(N)N)cc2)c(NS(C)(=O)=O)cc1OCc1ccccc1	1w0y-771	P08709
COc1ccc(Nc2ncnc(-c3cccnc3Nc3cc(NC(=O)c4ccc(CN5CC[NH+](C)CC5)cc4)ccc3C)n2)cc1	3g6g-G6G	P00523
COc1ccc(Nc2nc(NCCc3ccccc3F)nc(Nc3ccc4ncccc4c3)n2)cc1OC	3ha6-2JZ	O14965
COc1ccc(Nc2ncnc(Nc3cc(OC)c(OC)c(OC)c3)n2)cc1Cl	2vwv-7X3	P54760
COc1ccc(NC(=O)c2cccc3c(N)nc(C)nc23)cn1	3ps6-3PS	P48736
COc1ccc(N(C(=O)Nc2ccccc2Cl)c2ccnc(NC(C)C(C)(C)O)n2)cc1	2ghl-LIB	P47811
COc1ccc(N(C(=O)Oc2c(C)cccc2C)c2ccnc(Nc3cc(OC)c(OCCCN4CC[NH+](C)CC4)c(OC)c3)n2)c(OC)c1	2ofu-1N9	P06239
COc1ccc(NC(=S)NCCCn2ccnc2)cc1OC	3pbb-PBD	Q16769
COc1ccc(O)c(-c2nc3cc(C(=[NH2+])[NH3+])ccc3[nH]2)c1	1gi5-123	P00760
COc1ccc(O)c(-c2nc(N)nc(N)n2)c1	3pxy-JWS	P24941
COc1ccc(OC)c(Cc2cnc3nc(N)nc(N)c3c2C)c1	1u71-MXA	P00374
COc1ccc(OC)c(CCc2csc3nc(N)nc(N)c23)c1	3mcv-MCV	O76290
COc1ccc(S(N)(=O)=O)cc1	3lka-M4S	P39900
COc1ccc(S(=O)(=O)N2Cc3cc(C#N)ccc3N(Cc3cncn3C)CC2Cc2ccccc2)cc1	3pz1-3PZ	Q9JHK4
COc1ccc(S(=O)(=O)n2cc(CCC(=O)[O-])c3cc(OC)ccc32)cc1	3et1-ET1	Q07869
COc1ccc(S(=O)(=O)n2cc(CCC(=O)[O-])c3cc(OC)ccc32)cc1	3et3-ET1	P37231
COc1ccc(S(=O)(=O)N(Cc2cccnc2)C(C(=O)NO)C(C)C)cc1	1jiz-CGS	P39900
COc1ccc(S(=O)(=O)N(CC(C)C)CC(O)C(Cc2ccccc2)NC(=O)C2CN(c3cccc(C(C)=O)c3)C(=O)O2)cc1	2i0d-MUT	O38732
COc1ccc(S(=O)(=O)N(CC(C)C)CC(O)C(Cc2ccccc2)NC(=O)C2CN(c3ccc(C(C)=O)cc3)C(=O)O2)cc1	2i0a-MUI	O38732
COc1ccc(S(=O)(=O)N(CC(C)C)CC(O)C(Cc2ccccc2)NC(=O)OC2COC3OC4OCCC4C23)cc1	3ok9-G52	P03366
COc1ccc(S(=O)(=O)N(CC(C)C)CC(O)C(Cc2ccccc2)NC(=O)OC2COC3OCCC23)cc1	2i4v-DJR	P03366
COc1ccc(S(=O)(=O)N(CC(C)C)CC(O)C(Cc2ccccc2)NC(=O)OC2COC3OCCC23)cc1	3i7e-DJR	O38716
COc1ccc(S(=O)(=O)N(CC(C)C)CC(O)C(Cc2ccc(OCP([O-])(O)O)cc2)NC(=O)OC2COC3OCCC23)cc1	2i4d-QFI	P03366
COc1ccc(S(=O)(=O)N(CCOC2OC(CO)C(O)C(O)C2O)CC(=O)NO)cc1	3n2u-D3X	P39900
COc1ccc(S(=O)(=O)N(CCO)CC(=O)NO)cc1	3nx7-NHK	P39900
COc1ccc(S(=O)(=O)NC(CO)C(=O)N=O)cc1	3f16-HS3	P39900
COc1ccc(S(=O)(=O)NCC(=O)NO)cc1	3lk8-Z79	P39900
COc1ccc(S(=O)(=O)N(CC(=O)NO)CC(C)C)cc1	1rmz-NGH	P39900
COc1ccc(S(=O)(=O)N(CC(=O)N=O)CC(O)CO)cc1	3f15-HS1	P39900
COc1cc(Nc2nccc(Nc3c4c(ccc3Cl)OCO4)n2)cc(OC)c1OC	2vww-7X2	P54760
COc1cc(Nc2nccc(Nc3ccc4c(C)n[nH]c4c3)n2)cc(OC)c1OC	3cjf-SAV	P35968
COc1cc(Nc2ncc(F)c(Nc3ccc4c(n3)NC(=O)C(C)(C)O4)n2)cc(OC)c1OC	3fqs-585	P43405
COc1cc(Nc2ncnc(-c3cccnc3Nc3ccccc3)n2)cc(OC)c1OC	2p2h-994	P35968
COc1cc(N)ccc1-c1ccc2c(c1)[nH]nc2-c1nc2c(cccc2N2CC[NH+](C)CC2)[nH]1	3ezr-EZR	P24941
COc1cc[nH]c1C=C1C(=O)Nc2ccc(F)c(C#CC(O)C([NH3+])C(C)O)c21	1r78-FMD	P24941
COc1cc(O)c2c(c1C(=O)NCc1cccc3ccccc31)OC1=CC(=O)C(=C(C)[O-])C(=O)C21C	3lmp-CEK	P37231
COc1cc(OC)c(C=C2C(=O)Nc3ccccc32)c(OC)c1	1eh4-IC1	P40233
COc1cc(OC)cc(-c2nc(N)c(C[NH3+])c(-c3ccc(Cl)cc3Cl)n2)c1	1rwq-5AP	P27487
COc1cc(O)c(C=CC(=O)[O-])cc1C(O)CC(C)C	3f8e-TE1	P00918
COc1cc(OC)c(NC(=O)Nc2cnc(C#N)cn2)cc1Cl	2ywp-A42	O14757
COc1cc(O)cc(OC)c1O	3fu9-KIB	Q70KY3
COc1cc(=O)n(C)c2c3c(ccc12)OCO3	3g5m-XM5_XM5	P16083
COc1c(F)c(F)c(C(=O)NC2C(O)C(CO)OC(OC3C(O)C(NC(C)=O)C(O)OC3CO)C2O)c(F)c1F	1kjr-BEK_GAL_NAG	P17931
COC1(C(=O)[O-])CC(OC(C)=O)C(NC(C)=O)C(C(O)C(O)COC(C)=O)O1	3cl5-SIO	P15776
COC1(C(=O)[O-])CC(OC(C)=O)C(NC(C)=O)C(C(O)C(O)COC(C)=O)O1	3i1l-SIO	Q70KP4
COC1(C(=O)O)CC(O)C(NC(C)=O)C(C(O)C(O)CNC(=O)c2ccccc2)O1	1od9-BND	Q62230
COC1(C(=O)[O-])CC(O)C(NC(C)=O)C(C(O)C(O)CSC(C)=O)O1	3i27-SID	P0C0V9
COc1ncc(-c2ccc3nccc(-c4ccnnc4)c3c2)cc1NS(=O)(=O)c1ccc(F)cc1F	3l08-ZIG	P48736
COC1OC(C)Cc2oc3cc(O)c(O)c(C(=O)[O-])c3c(=O)c21	1kr3-113	P25910
COCc1c(C(C)C)nc(C(C)C)c(CCC(O)CC(O)CC(=O)[O-])c1-c1ccc(F)cc1	1hwj-116	P04035
COCc1cc(O)cc2c1OC(c1ccc(O)cc1)C1CCCC21	2qe4-JJ3	P03372
COC(Cc1ccc(OCCc2nc(-c3ccccc3)oc2C)c2ccsc21)C(=O)[O-]	3g9e-RO7	P37231
COC=CCC(NC(=O)C1CCCN1C(=O)C(NC(=O)OCc1ccccc1)C(c1ccccc1)c1ccccc1)P([O-])([O-])(OC)Oc1ccccc1	1h8d-PHW	P00734
COCCCN1C=C([NH3+])c2cc(S(N)(=O)=O)sc2S1(=O)=O	1i90-INM	P00918
COCCCNc1ncnc2[nH]cnc21	2yeh-2KU	P07900
COCCCOc1ccnc(CS(=O)c2nc3ccccc3[nH]2)c1C	3pgl-RZX	Q9GZU7
COCCN1CCCCC(NC(=O)C(CC(C)C)C(CCCO)C(=O)NO)C1=O	1biw-S80	P08254
COCCNS(=O)(=O)c1ccc(Nc2nccc(-c3c[nH+]c(C)n3C(C)C)n2)cc1	2w05-FRT	P24941
COCCNS(=O)(=O)c1ccc(Nc2nccc(-c3sc(=O)n(C)c3C)n2)cc1	2xmy-CDK	P24941
COCCOc1cc(C)nc(N)n1	2wi1-ZZ2	P07900
COCCOc1cncc(-c2cc3c4[nH]c5c(c4ccc3cn2)C(=O)NCC5)c1	3m42-HGF	P49137
COC(C(=O)N1Cc2[nH]nc(NC(=O)c3ccc(N4CC[NH+](C)CC4)cc3)c2C1)c1ccccc1	2j50-627	O14965
COC(=O)c1c(C)cc(Oc2cc(C)cc(O)c2O)cc1O	2za0-MGI	A5GZX3
COC(=O)C1=C(C)CC(=O)c2c(O)c3c(cc21)C(=O)c1cccc(O)c1C3=O	1sjw-NGV	Q9RN59
COC(=O)C1=C(C)CC(=O)c2c(O)c3c(cc21)C(=O)c1cccc(O)c1C3=O	2f98-NGV	O52646
COC(O)C1CC(Cl)CCC1[NH2+]C(O)C(O)O	1xiv-RB2	Q27743
COC(=O)c1ccc(O)cc1	3mth-MPB	P01315
COC(=O)c1ccc(O)c(OC)c1	2ye3-VXX	P07900
COC(=O)C1CCN(C(=O)C(Cc2cccc(C(=[NH2+])[NH3+])c2)NS(=O)(=O)c2ccc3ccccc3c2)CC1	1k1j-FD2	P00760
COC(=O)c1c(C)[nH]nc1-c1ccno1	2ye8-2D3	P07900
COC(=O)c1c(C)n[nH]c1-c1ccno1	2yej-XQK	P07900
COC(O)c1cn2c(n1)C(O)C(O)C(O)C2CO	2j7d-GI1	Q08638
COC(=O)c1c(O)cccc1OCCCCNC(=O)C(Cc1ccc(OC(C(=O)[O-])C(=O)[O-])cc1)NC(=O)OC(C)(C)C	1pyn-941	P18031
COC(=O)C1CSC2(c3ccccc3)c3ccccc3C(=O)N12	1c0u-BM5	P04585
COC(=O)C1(O)CC2OC1(C)[N+]1=c3c(c4c(c5c3=[N+]2c2ccccc2-5)C(=O)NC4)-c2ccccc21	3f69-XDR	P0A5S4
COC(=O)C1(O)CC2OC1(C)n1c3ccccc3c3c4c(c5c6ccccc6n2c5c31)C(=O)NC4	1r0p-KSA	P08581
COC(=O)C1(O)CC2OC1(C)n1c3ccccc3c3c4c(c5c6ccccc6n2c5c31)C(=O)NC4	3eqf-KSA	Q02750
COC(=O)c1sc(-c2cccs2)cc1NC(=O)C=CC(=O)[O-]	3hk1-B64	P04117
COC(=O)Cc1cc(O)cc(O)c1	2ye2-XQI	P07900
COC(=O)Cc1cn2c(n1)C(O)C(O)C(O)C2CO	2j7e-GI2	Q08638
COC(=O)C(C)c1ccc(-c2ccccc2)c(F)c1	1ht5-FL2	P05979
COC(=O)C(Cc1cccc(C(=[NH2+])[NH3+])c1)NC(=O)CNS(=O)(=O)c1ccc(C)cc1	1v2r-ANH	P00760
COC(=O)CC(CCc1ccc(C(=[NH2+])[NH3+])cc1)c1cccc(C(=[NH2+])[NH3+])c1	1az8-IN4	P00760
COC(=O)CCCC=C(c1cc(C#N)c(OC)c(C(=O)OC)c1)c1cc(C#N)c(OC)c(C(=O)OC)c1	3is9-AC7	P03366
COC(=O)C=CC(=O)NC(Cc1ccc(O)c(Cl)c1)C(=O)[O-]	3p4v-PMX	P00918
COC(=O)C(NC(=O)C(NC(=O)CCC(O)C(Cc1ccccc1)NC(=O)C(C)NC(=O)C(C)[NH3+])C(C)C)C(C)C	1aaq-PSI	Q8Q3J5
COC(=O)C(NC(=O)C(NC(=O)C(C)[NH+]1CCC(C(C)NC(=O)C(C)[NH3+])=CC(Cc2ccccc2)C1)C(C)C)C(C)C	1hbv-GAN	P03366
COC(=O)C(NC(=O)CNC(=O)C(CS)[NH2+]Cc1ccc(-c2ccccc2)cc1)C(C)C	1c3i-TR1	P08254
COC(=O)Nc1ccc2[nH]cc(CCNC(C)=O)c2c1	3ovm-MZC	P16083
COC(=O)Nc1ccc2[nH]c(I)c(CCNC(C)=O)c2c1	3owh-52X	P16083
COC(=O)Nc1nc2cc(Oc3ccc(NC(=O)Nc4cc(C(F)(F)F)ccc4F)cc3)ccc2[nH]1	2oh4-GIG	P35968
COC(=O)NC(C(=O)NC(Cc1ccc(-c2ccccn2)cc1)CC(O)C(Cc1ccccc1)NC(=O)C(NC(=O)OC)C(C)(C)C)C(C)(C)C	3gga-GGW	Q9Q2G8
COC(=O)NC(C(=O)NC(Cc1ccccc1)C(O)C[NH+](Cc1ccc(-c2ccccn2)cc1)NC(=O)C(NC(=O)OC)C(C)(C)C)C(C)(C)C	2o4k-DR7	P03367
COC(=O)NC(C(=O)NC(Cc1ccccc1)C(O)C[NH+](Cc1ccc(-c2ccccn2)cc1)NC(=O)C(NC(=O)OC)C(C)(C)C)C(C)(C)C	3ekw-DR7	P03369
COC(=O)NC(C(=O)NCCCCC(CO)N(CC(C)C)S(=O)(=O)c1ccc(C[NH3+])cc1)C(c1ccccc1)c1ccccc1	2q3k-MUW	O38732
COC(=O)NC(C(=O)NN(Cc1ccccc1)CC(O)(Cc1ccccc1)C(=O)NC1c2ccccc2CC1O)C(C)C	2bqv-A1A	O92139
CON=C(C(=O)NC1C(=O)N2C1SC=C(COC(N)=O)C2C(=O)[O-])c1ccco1	1qmf-KEF	P14677
CP(C)(=O)c1ccc(Nc2nc(C3CCCC3)nc3c2ncn3CCc2cccc(O)c2)cc1	2bdj-HET	P12931
CP([O-])(O)NC1C(O)OC(COP([O-])(O)O)C(O)C1O	2p53-NNG	P0AF18
CP([O-])(O)OP([O-])(O)OCC1OC(n2cnc3c2ncnc3N)C(O)C1O	3b2t-M33	P21802
CSc1ccc2cc(C(C)C(=O)[O-])ccc2c1	3ntb-T1N	Q05769
CSc1cc(-c2sc(-c3cccs3)nc2C)[nH]n1	3g75-B48	P0A0K8
CSc1nc(C)nc(N)n1	2wi3-ZZ3	P07900
CSc1ncnc2c1ncn2C1OC(CO)C(O)C1O	1pr4-MTP	P0ABP9
CSc1ncnc2[nH]cnc21	2yeg-XQG	P07900
CSc1nc(O)c(Cc2cccs2)[nH]1	2wmt-ZYT	O14757
CSCC1C[NH+](Cc2c[nH]c3c2ncnc3N)CC1O	1y6q-TDI	P0AF14
CSCC1[NH2+]C(c2c[nH]c3c2N=CNC3[NH3+])C(O)C1O	1y6r-MTM	P0AF14
CSCC1OC(n2ccc3c2ncnc3N)C(O)C1O	1nc1-MTH	P0AF14
CSCC1OC(n2cnc3c2ncnc3N)C(O)C1O	1z5o-MTA	P0AF14
CSCCC(NC(=O)C(NC(=O)C([NH3+])CCCC[NH3+])C(C)C)C(=O)[O-]	3glu-LYS_VAL_MET	Q9NTG7
C[S+](CCC(N)C(=O)[O-])CC1OC(n2cnc3c2ncnc3N)C(O)C1O	1v2x-SAM	Q9FAC4
CSCCC([NH3+])C(=O)NC(Cc1ccccc1)C(=O)NC(C)C(=O)NC(CC(C)C)C(=O)NCC(C)C	3nzi-MET_PHE_LYS_LEU_B2V	Q92743
CSCCC([NH3+])C(=O)NC(CC(=O)[O-])C(=O)N1CCCC1C(=O)[O-]	2bgr-MET_ASP_PRO	P27487
C[S+](CCC([NH3+])C(=O)[O-])CC1OC(n2cnc3c2ncnc3N)C(O)C1O	1olt-SAM	P32131
C[S+](CCC([NH3+])C(=O)[O-])CC1OC(n2cnc3c2ncnc3N)C(O)C1O	1xva-SAM	P13255
C[S+](CCC([NH3+])C(=O)[O-])CC1OC(n2cnc3c2ncnc3N)C(O)C1O	2npn-SAM	Q6NIF5
C[S+](CCC([NH3+])C(=O)[O-])CC1OC(n2cnc3c2ncnc3N)C(O)C1O	2nv4-SAM	O29998
C[S+](CCC([NH3+])C(=O)[O-])CC1OC(n2cnc3c2ncnc3N)C(O)C1O	2nyu-SAM	Q9UI43
C[S+](CCC([NH3+])C(=O)[O-])CC1OC(n2cnc3c2ncnc3N)C(O)C1O	2obv-SAM	Q00266
C[S+](CCC([NH3+])C(=O)[O-])CC1OC(n2cnc3c2ncnc3N)C(O)C1O	2qe6-SAM	Q47KX2
C[S+](CCC([NH3+])C(=O)[O-])CC1OC(n2cnc3c2ncnc3N)C(O)C1O	2z0y-SAM	Q5SKI6
C[S+](CCC([NH3+])C(=O)[O-])CC1OC(n2cnc3c2ncnc3N)C(O)C1O	3dlc-SAM	Q6LY14
C[S+](CCC([NH3+])C(=O)[O-])CC1OC(n2cnc3c2ncnc3N)C(O)C1O	3dou-SAM	Q97C13
C[S+](CCC([NH3+])C(=O)[O-])CC1OC(n2cnc3c2ncnc3N)C(O)C1O	3g07-SAM	Q7L2J0
C[S+](CCC([NH3+])C(=O)[O-])CC1OC(n2cnc3c2ncnc3N)C(O)C1O	3gyq-SAM	P18644
C[S+](CCC([NH3+])C(=O)[O-])CC1OC(n2cnc3c2ncnc3N)C(O)C1O	3o7w-SAM	Q9UIC8
C[S+](CCC([NH3+])C(=O)[O-])CC1OC(n2cnc3c2ncnc3N)C(O)C1O	3rfa-SAM	P36979
CSCC(NC(=O)CCC([NH3+])C(=O)[O-])C(=O)NCC(=O)[O-]	2ab6-GSM	P28161
CSCC(NC(=O)COc1cccc2cnccc21)C(=O)NC(Cc1ccccc1)C(O)C(=O)N1CSCC1C(=O)NC(C)(C)C	1hpx-KNI	P03367
CSCC(NC(=O)COc1cccc2cnccc21)C(=O)NC(Cc1ccccc1)C(O)C(=O)N1CSCC1C(=O)NC(C)(C)C	2zye-KNI	Q9EKL4
CS(=O)c1ccc(-c2nc(-c3ccc(F)cc3)c(-c3ccncc3)[nH]2)cc1	1pme-SB2	P28482
CS(=O)c1ccc(-c2nc(-c3ccc(F)cc3)c(-c3ccncc3)[nH]2)cc1	3mpa-SB2	Q16539
CS(=O)CCC([NH3+])C(=O)[O-]	3ksg-SME	Q6GFY9
CS(=O)(=O)c1ccc2c(c1)nc1n2CC([NH3+])C(c2cc(F)c(F)cc2F)C1	3hab-677	P27487
CS(=O)(=O)c1ccccc1-c1ccc(N2CCC(NS(=O)(=O)CCc3ccc(Cl)s3)C2=O)c(F)c1	2vh6-GSV	P00742
CS(=O)(=O)c1ccccc1-c1ccc(NC(=O)c2cc(C(F)(F)F)nn2-c2cccc(C[NH3+])c2)c(F)c1	3m36-M35	P00742
CS(=O)(=O)c1cccc(-c2cc(N3CCC(c4cc(F)c(F)cc4F)C([NH3+])C3)ncn2)c1	2oqv-MA9	P27487
CS(=O)(=O)c1ccc(C(CCNC(=O)c2ccc(C#N)cc2)c2ccc(F)cc2)cc1	3i28-34N	P34913
CS(=O)(=O)c1cccc(C(=O)NCC2CCCN2C(=O)CC([NH3+])Cc2cccc(Cl)c2)c1	3h0c-PS4	P27487
CS(=O)(=O)c1cccc(Nc2nccc(Nc3c4c(ccc3Cl)OCO4)n2)c1	2vwy-7X5	P54760
CS(=O)(=O)c1cccc(Nc2nccc(Nc3cccc4[nH]ncc43)n2)c1	2x9f-X9F	P54760
CS(=O)(=O)c1ccc(Nc2cc(Cl)nc3ccnn32)cc1	1y8y-CT7	P24941
CS(=O)(=O)N1CCc2c1nc(N1CCOCC1)nc2-c1cnc(N)nc1	3apc-MMD	P48736
CS(=O)(=O)N1CC[NH+](Cc2cc3nc(-c4ccc(N)nc4)nc(N4CCOCC4)c3s2)CC1	3l16-JZX	P48736
CS(=O)(=O)Nc1cccc(Nc2nccc(Nc3c4c(ccc3Cl)OCO4)n2)c1	2vwz-7X6	P54760
CS(=O)(=O)Nc1ccc([N+](=O)[O-])cc1Oc1ccccc1	3n8x-NIM	P05979
CS(=O)(=O)NCc1cccc(-c2cn3c(Cl)c[nH+]c3c(Nc3ccc(N4CCOCC4)cc3)n2)c1	2xng-A0H	O14965
Fc1cc(-c2cc[nH]c(=Nc3ccc(-n4cnc(N5CCOCC5)n4)cc3)n2)cc(N2CCOCC2)c1	3kvx-FMY	P53779
Fc1ccc(-c2ncn(CC3CC3)c2-c2ccncc2)cc1	1bl6-SB6	Q16539
Fc1ccc(-c2n[nH]cc2-c2ccncc2)cc1	3hvc-GG5	Q16539
Fc1ccccc1-c1cc(NCc2ccncc2)n2nccc2n1	2r3i-SCF	P24941
Fc1ccccc1-c1cn2ccnc2c(NCc2cccnc2)n1	2r3g-SC9	P24941
Fc1ccc(Oc2ncc3c(NC4CCOCC4)n[nH]c3n2)c(F)c1	3fmn-530	Q16539
Fc1nc2[nH]cnc2c(Cl)n1	1jdj-CFP	P90551
FC(F)(CNc1nccc2oc(Cc3ccccc3-n3cncn3)nc21)C1CCCC[NH2+]1	1zgi-382	P00734
Nc1ccc2cc3ccc(N)cc3nc2c1	2v57-PRL	Q58L87
Nc1ccc2cc3ccc(N)cc3nc2c1	3hth-PRL	Q79SH7
Nc1ccccc1C(=O)CC([NH3+])C(=O)[O-]	3pd6-KYN	P05202
Nc1ccccc1C(=O)[NH2+]CC(=O)NC(Cc1ccccc1)C(=O)[O-]	2hu8-BE2_GLY_PHE	Q9YBQ2
Nc1cccc(CC2C[NH2+]CC2Oc2cccc(Oc3ccccc3)c2)n1	3n2r-XJH	P29476
Nc1cccc(CN2C(O)[NH+](Cc3cccc(N)c3)C(Cc3ccccc3)C(O)C(O)C2Cc2ccccc2)c1	1dmp-DMQ	P04585
Nc1cccc(CN2C(O)[NH+](Cc3cccc(N)c3)C(Cc3ccccc3)C(O)C(O)C2Cc2ccccc2)c1	1rq9-DMQ	Q5RTL1
Nc1ccc(C(O)C(CO)NC(=O)C(Cl)Cl)cc1	1grq-CLK	Q56148
Nc1cc(C(F)(F)F)c(S(N)(=O)=O)cc1S(N)(=O)=O	2pow-I7C	P00918
Nc1cc(Cl)ccc1Oc1ccc(Cl)cc1O	3lt4-FB4	Q9BJJ9
Nc1cc(Cl)c(S(N)(=O)=O)cc1S(N)(=O)=O	3l14-I7B	P00918
Nc1cc(Nc2ccc(S(N)(=O)=O)cc2)ncn1	1jsv-U55	P24941
Nc1ccn(C2CC(O)C(COP([O-])(O)O)O2)c(=O)n1	1njc-DCM	P00469
Nc1ccn(C2CC(O)C(COP([O-])(O)O)O2)c(=O)n1	1nje-DCM	P00469
Nc1ccn(C2CC(O)C(COP([O-])(O)O)O2)c(=O)n1	2feo-DC	P0A6I0
Nc1ccn(C2CC(O)C(COP([O-])(O)OP([O-])(O)O)O2)c(=O)n1	2j4h-YYY	P28248
Nc1ccn(C2CC(O)C(COP([O-])(O)OP([O-])(O)OP([O-])(O)O)O2)c(=O)n1	1h78-DCP	P07071
Nc1ccn(C2CC(O)C(COP([O-])(O)OP([O-])(O)OP([O-])(O)O)O2)c(=O)n1	5ktq-DCP	P19821
Nc1ccn(C2OC(CO)C(O)C2(F)F)c(=O)n1	2no0-GEO	P27707
Nc1ccn(C2OC(CO)C(O)C(F)C2O)c(=O)n1	3l7b-DKZ	P00489
Nc1ccn(C2OC(COP([O-])(O)OC3(C(=O)[O-])CC(O)C(O)C(C(O)CO)O3)C(O)C2O)c(=O)n1	3k2v-CMK	A6TEL6
Nc1ccn(C2OC(COP([O-])(O)O)C(O)C2O)c(=O)n1	1lp6-C5P	O26232
Nc1ccn(C2OC(COP([O-])(O)O)C(O)C2O)c(=O)n1	2gn2-C5P	P11954
Nc1ccn(C2OC(COP([O-])(O)O)C(O)C2O)c(=O)n1	2ii6-C5P	Q15KI8
Nc1ccn(C2OC(COP([O-])(O)O)C(O)C2O)c(=O)n1	2ix0-C5P	P30850
Nc1ccn(C2OC(COP([O-])(O)O)C(O)C2O)c(=O)n1	2xcu-C5P	O66663
Nc1ccn(C2OC(COP([O-])(O)O)C(O)C2O)c(=O)n1	2xwm-C5P	A0R560
Nc1ccn(C2OC(COP([O-])(O)OP([O-])(O)OC3OC(CO)C(O)C(O)C3O)C(O)C2O)c(=O)n1	1tzf-C5G	P26396
NC1C=CN(C2OC(COP([O-])(O)OP([O-])(O)O)C(O)C2O)C(=O)N1	1eyr-CDP	P0A0Z8
Nc1ccn(C2OC(COP([O-])(O)OP([O-])(O)O)C(O)C2O)c(=O)n1	2vsi-CDF	A5MSS9
NC1C=CN(C2OC(COP(=O)(O)OP(=O)(O)O)C(O)C2O)C(=O)N1	3c3c-CDP	P00558
NC1C=CN(C2OC(COP([O-])(O)OP([O-])(O)OP([O-])(O)O)C(O)C2O)C(=O)N1	1vpa-CTP	Q9X1B3
NC1C=CN(C2OC(COP([O-])(O)OP([O-])(O)OP([O-])(O)O)C(O)C2O)C(=O)N1	1za1-CTP	P0A788
NC1C=CN(C2OC(COP([O-])(O)OP([O-])(O)OP([O-])(O)O)C(O)C2O)C(=O)N1	2be9-CTP	Q55338
NC1C=CN(C2OC(COP([O-])(O)OP([O-])(O)OP([O-])(O)O)C(O)C2O)C(=O)N1	2oh5-CTP	O10693
NC1C=CN(C2OC(COP([O-])(O)OP([O-])(O)OP([O-])(O)O)C(O)C2O)C(=O)N1	3q7u-CTP	P96864
Nc1c(I)c(C(=O)[O-])c(I)c(C(=O)[O-])c1I	3e79-I3C	P15363
Nc1c(I)c(C(=O)[O-])c(I)c(C(=O)[O-])c1I	3gt4-I3C	P06873
Nc1cncn1C1OC(COP([O-])(O)O)C(O)C1O	3k5i-AIR	A1CII2
Nc1cncn1C1OC(COP([O-])(O)O)C(O)C1O	3rgg-AIR	Q73PV9
Nc1c(=O)[nH]c(=O)[nH]c1N=CC(O)C(O)C(O)COP([O-])(O)O	3ex8-AIF	P17618
Nc1nc2c(C3[NH2+]C(CO)C(O)C3O)c[nH]c2c(=O)[nH]1	1b8n-IMG	P55859
Nc1nc2c(C3[NH2+]C(COP([O-])(O)O)C(O)C3O)c[nH]c2c(=O)[nH]1	1dqn-IMU	Q24973
Nc1nc2c(c(-c3c(Cl)cc(Cl)cc3OCCCC(F)(F)F)n1)CN(C(=O)NC1CCC1)C2	3r4o-FU3	P07900
Nc1nc2ccccc2n1Cc1ccc(Cl)c(Cl)c1	3gn2-AX8	O76290
Nc1nc2cccc(-c3ccccc3)c2n1Cc1ccc(Cl)c(Cl)c1	2wd8-VGF	O76290
Nc1nc2ccc(C(=O)c3c(F)cccc3F)cn2c1C(=O)c1ccccc1	1pye-PM1	P24941
Nc1nc2ccc(NC(=O)C3CCCN3C(=O)C(CC3CCCCC3)NS(=O)(=O)Cc3ccccc3)cc2s1	1sb1-165	P00734
Nc1nc2ccc(Oc3ccccc3)cc2c[n+]1C(CNC(=O)C1CCCCC1)C1CCCCC1	2wjo-QUD	P56817
Nc1nc2c(c(=O)[nH]1)CC=N2	3iny-7DG	P00491
Nc1nc2c(c(=O)[nH]1)N1CN(c3ccc(C(=O)NC(CCC(=O)[O-])C(=O)[O-])cc3)CC1CN2	3bgx-MEF	P0A884
Nc1nc2c(c(=O)[nH]1)NC1C(=O)C3OP([O-])(O)OCC3OC1N2	2qie-8CS	P65401
Nc1nc2c(c(=O)[nH]1)NC1C(S)=C(S)C(COP([O-])(O)O)OC1N2	1uux-MTE	Q39054
Nc1nc2c(c(=O)[nH]1)NC1C(S)=C(S)C(COP([O-])(O)OP([O-])(O)OCC3OC(n4cnc5c4ncnc5N)C(O)C3O)OC1N2	1uuy-MTE_AMP	Q39054
Nc1nc2c(c(=O)[nH]1)n(Cc1ccccc1)c[n+]2C1OC(COP([O-])(O)O)C(O)C1O	2v8x-MGQ	P06730
Nc1nc2c(c(=O)[nH]1)n(Cc1ccc(F)cc1)c[n+]2C1OC(COP([O-])(O)O)C(O)C1O	2v8y-MGV	P06730
Nc1nc2c(c(=O)[nH]1)NC(CNc1ccc(C(=O)NC(CCC(=O)[O-])C(=O)[O-])cc1)CN2	3bhl-THG	P0A884
Nc1nc2c(c(=O)[nH]1)N=C(CNc1ccc(C(=O)[O-])cc1)CN2	2y5s-78H	B4E5F5
Nc1nc2c(c(=O)[nH]1)N=C(COP([O-])(O)OP([O-])(O)O)CN2	1aj2-2PH	P0AC13
Nc1nc2c(ncn2C2CC(O)C(COP([O-])(O)OC3CC(n4cnc5c4nc(N)[nH]c5=O)OC3CO)O2)c(=O)[nH]1	1rxv-DG_DG	O29975
Nc1nc2c(ncn2C2CC(O)C(COP([O-])(O)OP([O-])(O)O)O2)c(=O)[nH]1	3h2y-DGI	Q81LQ0
Nc1nc2c(ncn2C2CC(O)C(COP([O-])(O)OP([O-])(O)OP([O-])(O)O)O2)c(=O)[nH]1	1hk8-DGT	P07071
Nc1nc2c(ncn2C2CC(O)C(COP([O-])(O)OP([O-])(O)OP([O-])(O)O)O2)c(=O)[nH]1	2atz-DGT	O24984
Nc1nc2c(ncn2C2CC(OP([O-])(O)OCC3OC(N4C=CC(N)NC4=O)CC3O)C(CO)O2)c(=O)[nH]1	1rnb-DG_DC	P00648
Nc1nc2c(ncn2C2OC3COP([O-])(O)OC4C(O)C(n5cnc6c5nc(N)[nH]c6=O)OC4COP([O-])(O)OC3C2O)c(=O)[nH]1	2wb4-C2E	Q9A5I5
Nc1nc2c(ncn2C2OC3COP([O-])(O)OC4C(O)C(n5cnc6c5nc(N)[nH]c6=O)OC4COP([O-])(O)OC3C2O)c(=O)[nH]1	3hv8-C2E	Q9HUK6
Nc1nc2c(ncn2C2OC3COP([O-])(O)OC4C(O)C(n5cnc6c5nc(N)[nH]c6=O)OC4COP([O-])(O)OC3C2O)c(=O)[nH]1	3pju-C2E	Q3KK31
Nc1nc2c(ncn2C2OC3COP([O-])(O)OC4C(O)C(n5cnc6c5[NH2+]C(=[NH2+])NC6=O)OC4COP([O-])(O)OC3C2O)c(=O)[nH]1	2w27-5GP_5GP	O35014
Nc1nc2c(ncn2C2OC(CO)C3OP(O)(=S)OC32)c(=O)[nH]1	7gsp-SGP	P00651
Nc1nc2c(ncn2C2OC(CO)CC2O)c(=O)[nH]1	1v45-3DG	P00491
Nc1nc2c(ncn2C2OC(CO)C(O)C2O)c(=O)[nH]1	1rfg-GMP	P00491
Nc1nc2c(ncn2C2OC(CO)C(O)C2O)c(=O)[nH]1	2qvn-GMP	A5KE01
Nc1nc2c(ncn2C2OC(CO)C(O)C2O)c(=O)[nH]1	3gcm-5GP	A7ZS61
Nc1nc2c(ncn2C2OC(CO)C(O)C2OP([O-])(O)O)c(=O)[nH]1	1fut-2GP	P10282
Nc1nc2c(ncn2C2OC(CO)C(O)C2OP([O-])(O)O)c(=O)[nH]1	1i0v-2GP	P00651
Nc1nc2c(ncn2C2OC(CO)C(OP([O-])(O)O)C2O)c(=O)[nH]1	1lov-3GP	P00651
Nc1nc2c(ncn2C2OC(CO)C(OP([O-])(O)O)C2O)c(=O)[nH]1	1rms-3GP	P00653
Nc1nc2c(ncn2C2OC(COP([O-])(O)CP([O-])(O)O)C(O)C2O)c(=O)[nH]1	3exm-GP2	Q9FBN7
Nc1nc2c(ncn2C2OC(COP([O-])(O)CP([O-])(O)OP([O-])(O)O)C(O)C2O)c(=O)[nH]1	1w5f-G2P	O08398
Nc1nc2c(ncn2C2OC(COP([O-])(O)CP([O-])(O)OP([O-])(O)O)C(O)C2O)c(=O)[nH]1	2bz0-G2P	P0A7I7
Nc1nc2c(ncn2C2OC(COP([O-])(O)OC3C(O)C(CO)OC3n3cnc4c3nc(N)[nH]c4=O)C(O)C2O)c(=O)[nH]1	2ea1-GPG	P21338
Nc1nc2c(ncn2C2OC(COP(O)(O)OC3C(O)C(CO)OC3n3cnc4c3nc(N)[nH]c4=O)C(O)C2O)c(=O)[nH]1	2rnt-GPG	P00651
Nc1nc2c(ncn2C2OC(COP([O-])(O)O)C(O)C2O)c(=O)[nH]1	1a97-5GP	P0A9M5
Nc1nc2c(ncn2C2OC(COP([O-])(O)O)C(O)C2O)c(=O)[nH]1	1ao0-5GP	P00497
Nc1nc2c(ncn2C2OC(COP([O-])(O)O)C(O)C2O)c(=O)[nH]1	1ex7-5GP	P15454
Nc1nc2c(ncn2C2OC(COP([O-])(O)O)C(O)C2O)c(=O)[nH]1	1g9t-5GP	P0A9M2
Nc1nc2c(ncn2C2OC(COP([O-])(O)O)C(O)C2O)c(=O)[nH]1	1hgx-5GP	P51900
Nc1nc2c(ncn2C2OC(COP([O-])(O)O)C(O)C2O)c(=O)[nH]1	1hmp-5GP	P00492
Nc1nc2c(ncn2C2OC(COP([O-])(O)O)C(O)C2O)c(=O)[nH]1	1iyb-5GP	Q7XZV5
Nc1nc2c(ncn2C2OC(COP([O-])(O)O)C(O)C2O)c(=O)[nH]1	1j1f-5GP	P23540
Nc1nc2c(ncn2C2OC(COP([O-])(O)O)C(O)C2O)c(=O)[nH]1	1jxm-5GP	P31016
Nc1nc2c(ncn2C2OC(COP([O-])(O)O)C(O)C2O)c(=O)[nH]1	1pzm-5GP	Q9NJI5
Nc1nc2c(ncn2C2OC(COP([O-])(O)O)C(O)C2O)c(=O)[nH]1	1qk3-5GP	Q26997
Nc1nc2c(ncn2C2OC(COP([O-])(O)O)C(O)C2O)c(=O)[nH]1	1vcz-5GP	Q9SSV1
Nc1nc2c(ncn2C2OC(COP([O-])(O)O)C(O)C2O)c(=O)[nH]1	3lnc-5GP	Q2GLF7
Nc1nc2c(ncn2C2OC(COP([O-])(O)O)C(O)C2O)c(=O)[nH]1	3pen-5GP	Q980A5
Nc1nc2c(ncn2C2OC(COP([O-])(O)OP([O-])(O)CP([O-])(O)O)C(O)C2O)c(=O)[nH]1	3i1f-GCP	Q980A5
Nc1nc2c(ncn2C2OC(COP([O-])(O)OP([O-])(O)CP([O-])(O)O)C(O)C2O)c(=O)[nH]1	3i92-GCP	P33650
Nc1nc2c(ncn2C2OC(COP([O-])(O)OP([O-])(O)NP([O-])(O)O)C(O)C2O)c(=O)[nH]1	1g7t-GNP	O26359
Nc1nc2c(ncn2C2OC(COP([O-])(O)OP([O-])(O)NP([O-])(O)O)C(O)C2O)c(=O)[nH]1	1ky2-GNP	P32939
Nc1nc2c(ncn2C2OC(COP([O-])(O)OP([O-])(O)NP([O-])(O)O)C(O)C2O)c(=O)[nH]1	1sz3-GNP	Q9RVK2
Nc1nc2c(ncn2C2OC(COP([O-])(O)OP([O-])(O)NP([O-])(O)O)C(O)C2O)c(=O)[nH]1	1vg8-GNP	P09527
Nc1nc2c(ncn2C2OC(COP([O-])(O)OP([O-])(O)NP([O-])(O)O)C(O)C2O)c(=O)[nH]1	1x3s-GNP	Q9NP72
Nc1nc2c(ncn2C2OC(COP([O-])(O)OP([O-])(O)NP([O-])(O)O)C(O)C2O)c(=O)[nH]1	1yvd-GNP	P35285
Nc1nc2c(ncn2C2OC(COP([O-])(O)OP([O-])(O)NP([O-])(O)O)C(O)C2O)c(=O)[nH]1	1yzk-GNP	P62491
Nc1nc2c(ncn2C2OC(COP([O-])(O)OP([O-])(O)NP([O-])(O)O)C(O)C2O)c(=O)[nH]1	1yzl-GNP	Q9R0M6
Nc1nc2c(ncn2C2OC(COP([O-])(O)OP([O-])(O)NP([O-])(O)O)C(O)C2O)c(=O)[nH]1	1yzn-GNP	P01123
Nc1nc2c(ncn2C2OC(COP([O-])(O)OP([O-])(O)NP([O-])(O)O)C(O)C2O)c(=O)[nH]1	1z06-GNP	O35963
Nc1nc2c(ncn2C2OC(COP([O-])(O)OP([O-])(O)NP([O-])(O)O)C(O)C2O)c(=O)[nH]1	1z08-GNP	Q9UL25
Nc1nc2c(ncn2C2OC(COP([O-])(O)OP([O-])(O)NP([O-])(O)O)C(O)C2O)c(=O)[nH]1	2aho-GNP	Q980A5
Nc1nc2c(ncn2C2OC(COP([O-])(O)OP([O-])(O)NP([O-])(O)O)C(O)C2O)c(=O)[nH]1	2ew1-GNP	Q15771
Nc1nc2c(ncn2C2OC(COP([O-])(O)OP([O-])(O)NP([O-])(O)O)C(O)C2O)c(=O)[nH]1	2f9m-GNP	Q15907
Nc1nc2c(ncn2C2OC(COP([O-])(O)OP([O-])(O)NP([O-])(O)O)C(O)C2O)c(=O)[nH]1	2fg5-GNP	Q13636
Nc1nc2c(ncn2C2OC(COP([O-])(O)OP([O-])(O)NP([O-])(O)O)C(O)C2O)c(=O)[nH]1	2ocb-GNP	Q9NP90
Nc1nc2c(ncn2C2OC(COP([O-])(O)OP([O-])(O)NP([O-])(O)O)C(O)C2O)c(=O)[nH]1	2wic-GNP	A6TF32
Nc1nc2c(ncn2C2OC(COP([O-])(O)OP([O-])(O)NP([O-])(O)O)C(O)C2O)c(=O)[nH]1	2wji-GNP	Q57986
Nc1nc2c(ncn2C2OC(COP([O-])(O)OP([O-])(O)NP([O-])(O)O)C(O)C2O)c(=O)[nH]1	3a1u-GNP	Q9WXQ8
Nc1nc2c(ncn2C2OC(COP(=O)(O)OP(=O)(O)NP(=O)(O)O)C(O)C2O)c(=O)[nH]1	3bc1-GNP	Q9ERI2
Nc1nc2c(ncn2C2OC(COP([O-])(O)OP([O-])(O)NP([O-])(O)O)C(O)C2O)c(=O)[nH]1	3ftq-GNP	P42208
Nc1nc2c(ncn2C2OC(COP([O-])(O)OP([O-])(O)NP([O-])(O)O)C(O)C2O)c(=O)[nH]1	3law-GNP	P51149
Nc1nc2c(ncn2C2OC(COP([O-])(O)OP([O-])(O)NP([O-])(O)O)C(O)C2O)c(=O)[nH]1	3nkv-GNP	Q9H0U4
Nc1nc2c(ncn2C2OC(COP([O-])(O)OP([O-])(O)NP([O-])(O)O)C(O)C2O)c(=O)[nH]1	3qbt-GNP	P61006
Nc1nc2c(ncn2C2OC(COP([O-])(O)OP([O-])(O)OC3OC(CO)C(O)C(O)C3O)C(O)C2O)c(=O)[nH]1	2gej-GDD	A0QWG6
Nc1nc2c(ncn2C2OC(COP([O-])(O)OP([O-])(O)OC3OC(CO)C(O)C(O)C3O)C(O)C2O)c(=O)[nH]1	2x5z-GDD	Q9X0C3
Nc1nc2c(ncn2C2OC(COP([O-])(O)OP([O-])(O)O)C(O)C2O)c(=O)[nH]1	1d5c-GDP	Q26000
Nc1nc2c(ncn2C2OC(COP([O-])(O)OP([O-])(O)O)C(O)C2O)c(=O)[nH]1	1efc-GDP	P0CE47
Nc1nc2c(ncn2C2OC(COP([O-])(O)OP([O-])(O)O)C(O)C2O)c(=O)[nH]1	1f6b-GDP	Q9QVY3
Nc1nc2c(ncn2C2OC(COP([O-])(O)OP([O-])(O)O)C(O)C2O)c(=O)[nH]1	1g16-GDP	P07560
Nc1nc2c(ncn2C2OC(COP([O-])(O)OP([O-])(O)O)C(O)C2O)c(=O)[nH]1	1kao-GDP	P10114
Nc1nc2c(ncn2C2OC(COP([O-])(O)OP([O-])(O)O)C(O)C2O)c(=O)[nH]1	1ky3-GDP	P32939
Nc1nc2c(ncn2C2OC(COP([O-])(O)OP([O-])(O)O)C(O)C2O)c(=O)[nH]1	1mky-GDP	Q9X1F8
Nc1nc2c(ncn2C2OC(COP([O-])(O)OP([O-])(O)O)C(O)C2O)c(=O)[nH]1	1oiv-GDP	P62490
Nc1nc2c(ncn2C2OC(COP([O-])(O)OP([O-])(O)O)C(O)C2O)c(=O)[nH]1	1oix-GDP	P62490
Nc1nc2c(ncn2C2OC(COP([O-])(O)OP([O-])(O)O)C(O)C2O)c(=O)[nH]1	1r5n-GDP	O74718
Nc1nc2c(ncn2C2OC(COP([O-])(O)OP([O-])(O)O)C(O)C2O)c(=O)[nH]1	1s4o-GDP	P27809
Nc1nc2c(ncn2C2OC(COP([O-])(O)OP([O-])(O)O)C(O)C2O)c(=O)[nH]1	1s8f-GDP	P24408
Nc1nc2c(ncn2C2OC(COP([O-])(O)OP([O-])(O)O)C(O)C2O)c(=O)[nH]1	1svi-GDP	P38424
Nc1nc2c(ncn2C2OC(COP([O-])(O)OP([O-])(O)O)C(O)C2O)c(=O)[nH]1	1tui-GDP	Q01698
Nc1nc2c(ncn2C2OC(COP([O-])(O)OP([O-])(O)O)C(O)C2O)c(=O)[nH]1	1u0l-GDP	Q9X242
Nc1nc2c(ncn2C2OC(COP([O-])(O)OP([O-])(O)O)C(O)C2O)c(=O)[nH]1	1ukv-GDP	P01123
Nc1nc2c(ncn2C2OC(COP([O-])(O)OP([O-])(O)O)C(O)C2O)c(=O)[nH]1	1vg1-GDP	P09527
Nc1nc2c(ncn2C2OC(COP([O-])(O)OP([O-])(O)O)C(O)C2O)c(=O)[nH]1	1vg9-GDP	P37727
Nc1nc2c(ncn2C2OC(COP([O-])(O)OP([O-])(O)O)C(O)C2O)c(=O)[nH]1	1wms-GDP	P51151
Nc1nc2c(ncn2C2OC(COP([O-])(O)OP([O-])(O)O)C(O)C2O)c(=O)[nH]1	1z0i-GDP	Q9UL25
Nc1nc2c(ncn2C2OC(COP([O-])(O)OP([O-])(O)O)C(O)C2O)c(=O)[nH]1	1z2a-GDP	P35288
Nc1nc2c(ncn2C2OC(COP([O-])(O)OP([O-])(O)O)C(O)C2O)c(=O)[nH]1	1zd9-GDP	Q96BM9
Nc1nc2c(ncn2C2OC(COP([O-])(O)OP([O-])(O)O)C(O)C2O)c(=O)[nH]1	2al7-GDP	Q9NVJ2
Nc1nc2c(ncn2C2OC(COP([O-])(O)OP([O-])(O)O)C(O)C2O)c(=O)[nH]1	2bmd-GDP	P20338
Nc1nc2c(ncn2C2OC(COP([O-])(O)OP([O-])(O)O)C(O)C2O)c(=O)[nH]1	2cxx-GDP	O57939
Nc1nc2c(ncn2C2OC(COP([O-])(O)OP([O-])(O)O)C(O)C2O)c(=O)[nH]1	2f7s-GDP	O00194
Nc1nc2c(ncn2C2OC(COP([O-])(O)OP([O-])(O)O)C(O)C2O)c(=O)[nH]1	2f9l-GDP	Q15907
Nc1nc2c(ncn2C2OC(COP([O-])(O)OP([O-])(O)O)C(O)C2O)c(=O)[nH]1	2gao-GDP	Q9NR31
Nc1nc2c(ncn2C2OC(COP([O-])(O)OP([O-])(O)O)C(O)C2O)c(=O)[nH]1	2gf0-GDP	O95057
Nc1nc2c(ncn2C2OC(COP([O-])(O)OP([O-])(O)O)C(O)C2O)c(=O)[nH]1	2gf9-GDP	O95716
Nc1nc2c(ncn2C2OC(COP([O-])(O)OP([O-])(O)O)C(O)C2O)c(=O)[nH]1	2ht6-GDP	P55040
Nc1nc2c(ncn2C2OC(COP([O-])(O)OP([O-])(O)O)C(O)C2O)c(=O)[nH]1	2j1l-GDP	O00212
Nc1nc2c(ncn2C2OC(COP([O-])(O)OP([O-])(O)O)C(O)C2O)c(=O)[nH]1	2nzj-GDP	O75628
Nc1nc2c(ncn2C2OC(COP([O-])(O)OP([O-])(O)O)C(O)C2O)c(=O)[nH]1	2o52-GDP	P61018
Nc1nc2c(ncn2C2OC(COP([O-])(O)OP([O-])(O)O)C(O)C2O)c(=O)[nH]1	2oil-GDP	P57735
Nc1nc2c(ncn2C2OC(COP([O-])(O)OP([O-])(O)O)C(O)C2O)c(=O)[nH]1	2oxr-GDP	Q9UYR9
Nc1nc2c(ncn2C2OC(COP([O-])(O)OP([O-])(O)O)C(O)C2O)c(=O)[nH]1	2qm7-GDP	Q8RPA0
Nc1nc2c(ncn2C2OC(COP([O-])(O)OP([O-])(O)O)C(O)C2O)c(=O)[nH]1	2qn6-GDP	Q980A5
Nc1nc2c(ncn2C2OC(COP([O-])(O)OP([O-])(O)O)C(O)C2O)c(=O)[nH]1	2qnr-GDP	Q15019
Nc1nc2c(ncn2C2OC(COP([O-])(O)OP([O-])(O)O)C(O)C2O)c(=O)[nH]1	2rcn-GDP	Q8ZKB0
Nc1nc2c(ncn2C2OC(COP([O-])([O-])OP(O)(O)O)C(O)C2O)c(=O)[nH]1	2wib-GDP	A6TF32
Nc1nc2c(ncn2C2OC(COP([O-])([O-])OP(O)(O)O)C(O)C2O)c(=O)[nH]1	2wjh-GDP	Q57986
Nc1nc2c(ncn2C2OC(COP([O-])(O)OP([O-])(O)O)C(O)C2O)c(=O)[nH]1	2www-GDP	Q8IVH4
Nc1nc2c(ncn2C2OC(COP([O-])(O)OP([O-])(O)O)C(O)C2O)c(=O)[nH]1	2x2e-GDP	Q05193
Nc1nc2c(ncn2C2OC(COP([O-])(O)OP([O-])(O)O)C(O)C2O)c(=O)[nH]1	2x77-GDP	Q4QEJ1
Nc1nc2c(ncn2C2OC(COP([O-])([O-])OP(O)(O)O)C(O)C2O)c(=O)[nH]1	2y4k-GDP	Q9RFR0
Nc1nc2c(ncn2C2OC(COP([O-])(O)OP([O-])(O)O)C(O)C2O)c(=O)[nH]1	2yv5-GDP	A4PIH2
Nc1nc2c(ncn2C2OC(COP([O-])(O)OP([O-])(O)O)C(O)C2O)c(=O)[nH]1	2zej-GDP	Q17RV3
Nc1nc2c(ncn2C2OC(COP([O-])([O-])OP(O)(O)O)C(O)C2O)c(=O)[nH]1	3a1s-GDP	Q9WXQ8
Nc1nc2c(ncn2C2OC(COP([O-])(O)OP([O-])(O)O)C(O)C2O)c(=O)[nH]1	3bfk-GDP	Q76NM4
Nc1nc2c(ncn2C2OC(COP([O-])(O)OP([O-])(O)O)C(O)C2O)c(=O)[nH]1	3clv-GDP	O96193
Nc1nc2c(ncn2C2OC(COP(=O)(O)OP(=O)(O)O)C(O)C2O)c(=O)[nH]1	3dz8-GDP	P20337
Nc1nc2c(ncn2C2OC(COP(=O)(O)OP(=O)(O)O)C(O)C2O)c(=O)[nH]1	3ec1-GDP	Q5KWX6
Nc1nc2c(ncn2C2OC(COP(=O)(O)OP(=O)(O)O)C(O)C2O)c(=O)[nH]1	3fqj-GDP	O70348
Nc1nc2c(ncn2C2OC(COP([O-])(O)OP([O-])(O)O)C(O)C2O)c(=O)[nH]1	3i8x-GDP	P33650
Nc1nc2c(ncn2C2OC(COP([O-])(O)OP([O-])(O)O)C(O)C2O)c(=O)[nH]1	3ieu-GDP	P06616
Nc1nc2c(ncn2C2OC(COP([O-])(O)OP([O-])(O)O)C(O)C2O)c(=O)[nH]1	3l43-GDP	Q9UQ16
Nc1nc2c(ncn2C2OC(COP([O-])(O)OP([O-])(O)O)C(O)C2O)c(=O)[nH]1	3lx8-GDP	Q5M586
Nc1nc2c(ncn2C2OC(COP([O-])(O)OP([O-])(O)O)C(O)C2O)c(=O)[nH]1	3lxw-GDP	Q8WWP7
Nc1nc2c(ncn2C2OC(COP([O-])([O-])OP(O)(O)O)C(O)C2O)c(=O)[nH]1	3nxs-GDP	A0QX37
Nc1nc2c(ncn2C2OC(COP([O-])([O-])OP(O)(O)O)C(O)C2O)c(=O)[nH]1	3okc-GDP	Q8NNK8
Nc1nc2c(ncn2C2OC(COP([O-])([O-])OP(O)(O)O)C(O)C2O)c(=O)[nH]1	3p32-GDP	P63577
Nc1nc2c(ncn2C2OC(COP([O-])([O-])OP(O)(O)O)C(O)C2O)c(=O)[nH]1	3pqc-GDP	Q9X1H7
Nc1nc2c(ncn2C2OC(COP([O-])(O)OP([O-])([O-])O)C(OP([O-])(O)O)C2O)c(=O)[nH]1	2hxs-G3D	P51157
Nc1nc2c(ncn2C2OC(COP([O-])(O)OP([O-])(O)O)C(OP([O-])(O)OP([O-])([O-])O)C2O)c(=O)[nH]1	1lnz-G4P	P20964
Nc1nc2c(ncn2C2OC(COP([O-])(O)OP([O-])(O)O)C(OP([O-])(O)OP([O-])([O-])O)C2O)c(=O)[nH]1	2j4r-G4P	O67040
Nc1nc2c(ncn2C2OC(COP([O-])(O)OP([O-])(O)O)C(OP([O-])(O)OP([O-])([O-])O)C2O)c(=O)[nH]1	3n75-G4P	P0A9H3
Nc1nc2c(ncn2C2OC(COP([O-])(O)OP([O-])(O)OP([O-])(O)O)CC2O)c(=O)[nH]1	2pi4-GH3	P00573
Nc1nc2c(ncn2C2OC(COP([O-])(O)OP([O-])(O)OP([O-])(O)O)C(O)C2O)c(=O)[nH]1	1c80-GTP	P07953
Nc1nc2c(ncn2C2OC(COP([O-])(O)OP([O-])(O)OP([O-])(O)O)C(O)C2O)c(=O)[nH]1	1jlr-GTP	Q26998
Nc1nc2c(ncn2C2OC(COP([O-])(O)OP([O-])(O)OP([O-])(O)O)C(O)C2O)c(=O)[nH]1	1p16-GTP	P78587
Nc1nc2c(ncn2C2OC(COP([O-])(O)OP([O-])(O)OP([O-])(O)O)C(O)C2O)c(=O)[nH]1	1s49-GTP	P19711
Nc1nc2c(ncn2C2OC(COP([O-])(O)OP([O-])(O)OP([O-])(O)O)C(O)C2O)c(=O)[nH]1	1t91-GTP	P51149
Nc1nc2c(ncn2C2OC(COP([O-])(O)OP([O-])(O)OP([O-])(O)O)C(O)C2O)c(=O)[nH]1	1yhn-GTP	Q96NA2
Nc1nc2c(ncn2C2OC(COP([O-])(O)OP([O-])(O)OP([O-])(O)O)C(O)C2O)c(=O)[nH]1	1z0j-GTP	P35285
Nc1nc2c(ncn2C2OC(COP([O-])(O)OP([O-])(O)OP([O-])(O)O)C(O)C2O)c(=O)[nH]1	2bto-GTP	Q8GCC5
Nc1nc2c(ncn2C2OC(COP([O-])(O)OP([O-])(O)OP([O-])(O)O)C(O)C2O)c(=O)[nH]1	2gzd-GTP	P62491
Nc1nc2c(ncn2C2OC(COP([O-])(O)OP([O-])(O)OP([O-])(O)O)C(O)C2O)c(=O)[nH]1	2h57-GTP	Q9H0F7
Nc1nc2c(ncn2C2OC(COP(=O)(O)OP(=O)(O)OP(=O)(O)O)C(O)C2O)c(=O)[nH]1	2jlg-GTP	P11124
Nc1nc2c(ncn2C2OC(COP(=O)(O)OP(=O)(O)OP(=O)(O)O)C(O)C2O)c(=O)[nH]1	2r7x-GTP	O37061
Nc1nc2c(ncn2C2OC(COP([O-])(O)OP([O-])(O)OP([O-])(O)O)C(O)C2O)c(=O)[nH]1	2x60-GTP	Q9X0C3
Nc1nc2c(ncn2C2OC(COP([O-])(O)OP([O-])(O)OP([O-])(O)O)C(O)C2O)c(=O)[nH]1	2xi3-GTP	P27958
Nc1nc2c(ncn2C2OC(COP(=O)(O)OP(=O)(O)OP(=O)(O)O)C(O)C2O)c(=O)[nH]1	3dzh-GTP	P28907
Nc1nc2c(ncn2C2OC(COP(=O)(O)OP(=O)(O)OP(=O)(O)O)C(O)C2O)c(=O)[nH]1	3ffu-GTP	Q6MPX4
Nc1nc2c(ncn2C2OC(COP([O-])(O)OP([O-])(O)OP([O-])(O)O)C(O)C2O)c(=O)[nH]1	3jqm-GTP	Q5SHE1
Nc1nc2c(ncn2C2OC(COP([O-])(O)OP([O-])(O)OP([O-])(O)O)C(O)C2O)c(=O)[nH]1	3ldu-GTP	Q186Y7
Nc1nc2c(ncn2C2OC(COP([O-])(O)OP([O-])(O)OP([O-])(O)O)C(O)C2O)c(=O)[nH]1	3q22-GTP	Q859P9
Nc1nc2c(ncn2C2OC(COP([O-])(O)OP([O-])(O)OP([O-])(O)O)C(O)C2O)c(=O)[nH]1	3rsb-GTP	Q58517
Nc1nc2c(ncn2C2OC(COP([O-])(O)OP([O-])(O)OP(O)(O)=S)C(O)C2O)c(=O)[nH]1	1oiw-GSP	P62490
Nc1nc2c(ncn2CC(CO)OCP([O-])(O)O)c(=O)[nH]1	3gep-24H	P00492
Nc1nc2c(ncn2CCOCCP([O-])(O)O)c(=O)[nH]1	3ggj-25H	P00492
Nc1nc2c(ncnc2N)n1C1OC(CO)C(O)C1O	3fzh-3BH	P11142
Nc1nc2ncc(C(O)C(O)CO)nc2c(=O)[nH]1	2nm2-NEU	P56740
Nc1nc2ncc(C(O)C(O)CO)nc2c(=O)[nH]1	2o90-NEU	P0AC16
Nc1nc2ncc(COP([O-])(O)O)nc2c(=O)[nH]1	1eye-PMM	P0A578
Nc1nc2ncc(COP([O-])(O)O)nc2c(=O)[nH]1	2bmb-PMM	P53848
Nc1nc2ncc(COP([O-])(O)O)nc2c(=O)[nH]1	2veg-PMM	P59655
Nc1nc2ncc(COP([O-])(O)OP([O-])(O)O)nc2c(=O)[nH]1	1ad4-HH2	O05701
Nc1nc2ncc(COP([O-])(O)OP([O-])(O)O)nc2c(=O)[nH]1	1tww-HH2	Q81VW8
Nc1nc2ncn(CC[NH2+]C(CO)CO)c2c(=O)[nH]1	1fxu-GU7	P55859
Nc1nc2[nH]cc(CCc3ccccc3)c2c(=O)[nH]1	3jqb-DX6	Q581W1
Nc1nc2[nH]cc(CCc3ccc(C(=O)NC(CCc4nn[nH]n4)C(=O)[O-])cc3)c2c(=O)[nH]1	1jtq-LY3	P0A884
Nc1nc2[nH]c(I)nc2c(=O)[nH]1	1c3x-8IG	P81989
NC1=NC(=C2CCC(NC(=O)C3C=CCn4c(=O)n(CCS(=O)(=O)c5ccccc5)c(=O)n43)CC2)C=N1	1d6w-AIM_HMM_SML	P00734
Nc1ncc(-c2nc(N3CCOCC3)nc3c2CCN3c2cccnc2)cn1	3apd-MMY	P48736
Nc1ncccc1NCc1cccc(-c2ccc3cc[nH]c3c2)c1	2oht-IP6	P56817
Nc1nccc(-c2c(-c3ccc(F)cc3)ncn2C2CC[NH2+]CC2)n1	1bl7-SB4	Q16539
Nc1nccc(-c2c(-c3ccc(F)cc3)ncn2CC2CC2)n1	1bmk-SB5	Q16539
Nc1nccc(-c2cc3c([nH]2)C(CCF)CNC3=O)n1	3du8-553	P49841
Nc1nccc(-c2ccc3noc(-c4ccc(Cl)cc4)c3c2)n1	3bgp-VX1	P11309
Nc1nccc(-c2cccnc2)n1	2xdk-XDK	P07900
Nc1nccc(Nc2cc3cn[nH]c3c(-c3cc4ccccc4o3)c2)n1	3kc3-MK2	P49137
Nc1ncc(C(=O)c2cccc(Br)c2)o1	2w6m-OA1	P24182
Nc1nc(C(F)(F)F)ncc1COP([O-])(O)OP([O-])(O)O	1g4p-FQP	P39594
Nc1nc(Cl)cc(-c2cc(OCC[NH+]3CCOCC3)c(Cl)cc2Cl)n1	2xhr-C0P	P07900
Nc1nc(Cl)nc2c1ncn2C1CC(O)C(CO)O1	2zi9-CL9	P27707
Nc1nc(Cl)nc2c1ncn2C1OC(CO)C(O)C1F	2a7q-CFB	P27707
Nc1ncc(N=Nc2ccccc2)c(-c2ccc(Cl)cc2Cl)n1	2wi4-ZZ4	P07900
Nc1nc(F)nc2c1ncn2C1CC(O)C(CO)O1	1pke-2FD	P0ABP9
Nc1nc(F)nc2c1ncn2C1CC(O)C(CO)O1	3ggs-2FD	P00491
Nc1nc(F)nc2c1ncn2C1OC(CO)C(O)C1O	1pk9-2FA	P0ABP9
Nc1ncnc2c1c(-c1cnc3[nH]ccc3c1)nn2C1CCCC1	3en4-KS1	P00523
Nc1ncnc2c1c(Cc1cccc3ccccc31)nn2CC1CC[NH2+]CC1	3mwu-BK3	A3FQ16
Nc1ncnc2c1c(Cc1cccc3ccccc31)nn2CC1CC[NH2+]CC1	3n51-BK3	Q9BJF5
Nc1ncnc2c1ccn2C1OC(CO)C(O)C1O	1pr5-TBN	P0ABP9
Nc1ncnc2c1c(I)cn2C1OC(CO)C(O)C1O	3iq7-5ID	Q8TF76
Nc1ncnc2c1ncn2C1CCC(COP([O-])(O)OP([O-])(O)OP([O-])(O)O)O1	3lwm-DDS	P19821
Nc1ncnc2c1ncn2C1CCC(COP([O-])(O)OP([O-])(O)OP([O-])(O)O)O1	3po4-DDS	P19821
Nc1ncnc2c1ncn2C1CC(O)C(CO)O1	2zi3-3D1	P27707
Nc1ncnc2c1ncn2C1CC(O)C(CO)O1	2zi4-3L1	P27707
Nc1ncnc2c1ncn2C1CC(O)C(COP([O-])(O)OP([O-])(O)O)O1	3iim-DAT	Q9Y3D8
Nc1ncnc2c1ncn2C1CC(O)C(COP([O-])(O)OP([O-])(O)OP([O-])(O)O)O1	2ocp-DTP	Q16854
Nc1ncnc2c1ncn2C1CC(O)C(COP([O-])(O)OP([O-])(O)OP([O-])(O)O)O1	3kk2-DTP	P04585
Nc1ncnc2c1ncn2C1OC2COP([O-])(O)OC2C1O	1ykd-CMP	P94182
Nc1ncnc2c1ncn2C1OC2COP([O-])(O)OC2C1O	2our-CMP	Q9Y233
Nc1ncnc2c1ncn2C1OC2COP([O-])(O)OC2C1O	3n10-CMP	Q7CH76
Nc1ncnc2c1ncn2C1OC(CC(N)CCC([NH3+])C(=O)[O-])C(O)C1O	2yx1-SFG	Q58293
Nc1ncnc2c1ncn2C1OC(CC(N)CCC([NH3+])C(=O)[O-])C(O)C1O	3epp-SFG	O43148
Nc1ncnc2c1ncn2C1OC(CC(N)CCC([NH3+])C(=O)[O-])C(O)C1O	3n71-SFG	P97443
Nc1ncnc2c1ncn2C1OCC(O)C1O	2i2b-CC5	Q8Y8D7
Nc1ncnc2c1ncn2C1OC(CO)C(O)C1O	1bx4-ADN	P55263
Nc1ncnc2c1ncn2C1OC(CO)C(O)C1O	1fmo-ADN	P05132
Nc1ncnc2c1ncn2C1OC(CO)C(O)C1O	1ho5-ADN	P07024
Nc1ncnc2c1ncn2C1OC(CO)C(O)C1O	1jg2-ADN	Q8TZR3
Nc1ncnc2c1ncn2C1OC(CO)C(O)C1O	1muo-ADN	O14965
Nc1ncnc2c1ncn2C1OC(CO)C(O)C1O	1pk7-ADN	P0ABP9
Nc1ncnc2c1ncn2C1OC(CO)C(O)C1O	1pr6-XYA	P0ABP9
Nc1ncnc2c1ncn2C1OC(CO)C(O)C1O	1pw7-RAB	P0ABP9
Nc1ncnc2c1ncn2C1OC(CO)C(O)C1O	1q97-ADN	Q03656
Nc1ncnc2c1ncn2C1OC(CO)C(O)C1O	1uay-ADN	Q7SIA1
Nc1ncnc2c1ncn2C1OC(CO)C(O)C1O	1vhw-ADN	Q9KPM0
Nc1ncnc2c1ncn2C1OC(CO)C(O)C1O	1yi4-ADN	P11309
Nc1ncnc2c1ncn2C1OC(CO)C(O)C1O	1ztf-XYA	O28471
Nc1ncnc2c1ncn2C1OC(CO)C(O)C1O	2jc9-ADN	P49902
Nc1ncnc2c1ncn2C1OC(CO)C(O)C1O	2q83-ADN	O34656
Nc1ncnc2c1ncn2C1OC(CO)C(O)C1O	2w03-ADN	Q93AT8
Nc1ncnc2c1ncn2C1OC(CO)C(O)C1O	3grv-ADN	Q58435
Nc1ncnc2c1ncn2C1OC(CO)C(O)C1O	3oi8-ADN	Q9K0P8
Nc1ncnc2c1ncn2C1OC(CO)C(O)C1OP([O-])(O)O	3ahw-2AM	P00654
Nc1ncnc2c1ncn2C1OC(CO)C(O)C1OP([O-])(O)O	6rnt-2AM	P00651
Nc1ncnc2c1ncn2C1OC(CO)C(OP([O-])(O)O)C1O	3agn-3AM	P00654
Nc1ncnc2c1ncn2C1OC(COP([O-])(O)CP([O-])(O)OP([O-])(O)O)C(O)C1O	1nut-APC	Q96T66
Nc1ncnc2c1ncn2C1OC(COP([O-])(O)CP([O-])(O)OP([O-])(O)O)C(O)C1O	1ybu-APC	O07732
Nc1ncnc2c1ncn2C1OC(COP([O-])(O)CP([O-])(O)OP([O-])(O)O)C(O)C1O	3g5a-APC	Q6FNA9
Nc1ncnc2c1ncn2C1OC(COP(=O)(O)O)C(O)C1O	1amu-AMP	P0C061
Nc1ncnc2c1ncn2C1OC(COP([O-])(O)O)C(O)C1O	1h3d-AMP	P60758
Nc1ncnc2c1ncn2C1OC(COP([O-])(O)O)C(O)C1O	1ktg-AMP	Q9U2M7
Nc1ncnc2c1ncn2C1OC(COP([O-])(O)O)C(O)C1O	1ry2-AMP	Q01574
Nc1ncnc2c1ncn2C1OC(COP([O-])(O)O)C(O)C1O	1yxu-AMP	P11309
Nc1ncnc2c1ncn2C1OC(COP([O-])(O)O)C(O)C1O	1zn8-AMP	P07741
Nc1ncnc2c1ncn2C1OC(COP([O-])(O)O)C(O)C1O	2ak3-AMP	P08760
Nc1ncnc2c1ncn2C1OC(COP([O-])(O)O)C(O)C1O	2fjb-AMP	O28603
Nc1ncnc2c1ncn2C1OC(COP([O-])(O)O)C(O)C1O	2hcr-AMP	P60891
Nc1ncnc2c1ncn2C1OC(COP([O-])(O)O)C(O)C1O	2j91-AMP	P30566
Nc1ncnc2c1ncn2C1OC(COP(=O)(O)O)C(O)C1O	2jb7-AMP	Q8ZVF7
Nc1ncnc2c1ncn2C1OC(COP([O-])(O)O)C(O)C1O	2qrk-AMP	P38998
Nc1ncnc2c1ncn2C1OC(COP([O-])(O)O)C(O)C1O	2r7m-AMP	Q57600
Nc1ncnc2c1ncn2C1OC(COP([O-])(O)O)C(O)C1O	2rif-AMP	Q8ZVX8
Nc1ncnc2c1ncn2C1OC(COP([O-])(O)O)C(O)C1O	2vfk-AMP	Q6JP77
Nc1ncnc2c1ncn2C1OC(COP([O-])(O)O)C(O)C1O	2vso-AMP	P10081
Nc1ncnc2c1ncn2C1OC(COP([O-])(O)O)C(O)C1O	2x3k-AMP	Q93AT8
Nc1ncnc2c1ncn2C1OC(COP([O-])(O)O)C(O)C1O	2xxb-AMP	Q5SJA1
Nc1ncnc2c1ncn2C1OC(COP([O-])(O)O)C(O)C1O	2yab-AMP	Q8VDF3
Nc1ncnc2c1ncn2C1OC(COP([O-])(O)O)C(O)C1O	2yb1-AMP	Q7NXD4
Nc1ncnc2c1ncn2C1OC(COP([O-])(O)O)C(O)C1O	2yrx-AMP	Q5L3C7
Nc1ncnc2c1ncn2C1OC(COP([O-])(O)O)C(O)C1O	2ze5-AMP	P58758
Nc1ncnc2c1ncn2C1OC(COP([O-])(O)O)C(O)C1O	3a9v-AMP	Q941M3
Nc1ncnc2c1ncn2C1OC(COP([O-])(O)O)C(O)C1O	3ber-AMP	Q9H0S4
Nc1ncnc2c1ncn2C1OC(COP([O-])(O)O)C(O)C1O	3c0h-AMP	O14936
Nc1ncnc2c1ncn2C1OC(COP(=O)(O)O)C(O)C1O	3cw9-AMP	Q8GN86
Nc1ncnc2c1ncn2C1OC(COP([O-])(O)O)C(O)C1O	3dah-AMP	Q3JW86
Nc1ncnc2c1ncn2C1OC(COP([O-])(O)O)C(O)C1O	3ddj-AMP	Q97U20
Nc1ncnc2c1ncn2C1OC(COP([O-])(O)O)C(O)C1O	3dlz-AMP	Q8TF76
Nc1ncnc2c1ncn2C1OC(COP(=O)(O)O)C(O)C1O	3dqx-AMP	P00523
Nc1ncnc2c1ncn2C1OC(COP(=O)(O)O)C(O)C1O	3e7w-AMP	P39581
Nc1ncnc2c1ncn2C1OC(COP(=O)(O)O)C(O)C1O	3fwz-AMP	P39830
Nc1ncnc2c1ncn2C1OC(COP([O-])(O)O)C(O)C1O	3gru-AMP	Q58435
Nc1ncnc2c1ncn2C1OC(COP(=O)(O)O)C(O)C1O	3hf7-AMP	A6TCM0
Nc1ncnc2c1ncn2C1OC(COP([O-])(O)O)C(O)C1O	3i0q-AMP	O06916
Nc1ncnc2c1ncn2C1OC(COP([O-])(O)O)C(O)C1O	3jtf-AMP	Q7WB69
Nc1ncnc2c1ncn2C1OC(COP([O-])(O)O)C(O)C1O	3k31-NAD	Q2GKM8
Nc1ncnc2c1ncn2C1OC(COP([O-])(O)O)C(O)C1O	3lfr-AMP	Q87VX8
Nc1ncnc2c1ncn2C1OC(COP([O-])(O)O)C(O)C1O	3lhh-AMP	Q8EDE1
Nc1ncnc2c1ncn2C1OC(COP([O-])(O)O)C(O)C1O	3loq-AMP	O28514
Nc1ncnc2c1ncn2C1OC(COP([O-])(O)O)C(O)C1O	3lq3-ADP_AMP	Q9Y259
Nc1ncnc2c1ncn2C1OC(COP([O-])(O)O)C(O)C1O	3lw7-AMP	D0KU01
Nc1ncnc2c1ncn2C1OC(COP([O-])(O)O)C(O)C1O	3m84-AMP	Q5NGF2
Nc1ncnc2c1ncn2C1OC(COP([O-])(O)O)C(O)C1O	3n8h-AMP	Q5NF57
Nc1ncnc2c1ncn2C1OC(COP([O-])(O)O)C(O)C1O	3nqr-AMP	P0A2L3
Nc1ncnc2c1ncn2C1OC(COP([O-])(O)O)C(O)C1O	3nyo-AMP	P43250
Nc1ncnc2c1ncn2C1OC(COP([O-])(O)O)C(O)C1O	3o80-ANP	P33284
Nc1ncnc2c1ncn2C1OC(COP([O-])(O)O)C(O)C1O	3p4e-AMP	Q9KPY6
Nc1ncnc2c1ncn2C1OC(COP([O-])(O)O)C(O)C1O	3r96-AMP	Q47510
Nc1ncnc2c1ncn2C1OC(COP([O-])(O)O)C(O)C1O	3rk0-AMP	Q8U2K6
Nc1ncnc2c1ncn2C1OC(COP([O-])([O-])O)C(O)C1OP([O-])(O)O	1e7y-NDP	P11411
Nc1ncnc2c1ncn2C1OC(COP([O-])(O)O)C(O)C1OP([O-])([O-])O	2gz2-A2P	Q8DQ00
Nc1ncnc2c1ncn2C1OC(COP([O-])(O)OC(=O)c2ccc(Cl)cc2)C(O)C1O	3cw8-00A	Q8GN86
Nc1ncnc2c1ncn2C1OC(COP([O-])(O)OC(=O)Cc2ccccc2)C(O)C1O	2y4n-DLL	B4E7B5
Nc1ncnc2c1ncn2C1OC(COP([O-])(O)OC(=O)C([NH3+])Cc2c[nH]c3ccccc23)C(O)C1O	1i6m-TYM	P00953
Nc1ncnc2c1ncn2C1OC(COP([O-])(O)OC(=O)C([NH3+])CO)C(O)C1O	1wle-SRP	Q9N0F3
Nc1ncnc2c1ncn2C1OC(COP([O-])(O)O)C(OP([O-])(O)O)C1O	3hqj-COA	P0A4W8
Nc1ncnc2c1ncn2C1OC(COP([O-])(O)OP(N)([O-])O)C(O)C1O	3o7l-ANP	P05132
Nc1ncnc2c1ncn2C1OC(COP([O-])(O)OP([O-])(O)C(F)(F)P([O-])(O)O)C(O)C1O	1dvr-ATF	P07170
Nc1ncnc2c1ncn2C1OC(COP([O-])(O)OP([O-])(O)C(F)(F)P([O-])(O)O)C(O)C1O	2vr1-ATF	P24182
Nc1ncnc2c1ncn2C1OC(COP([O-])(O)OP([O-])(O)CP([O-])(O)O)C(O)C1O	1i44-ACP	P06213
Nc1ncnc2c1ncn2C1OC(COP([O-])(O)OP([O-])(O)CP([O-])(O)O)C(O)C1O	1k3a-ACP	P08069
Nc1ncnc2c1ncn2C1OC(COP([O-])(O)OP([O-])(O)CP([O-])(O)O)C(O)C1O	1saz-ACP	Q9X278
Nc1ncnc2c1ncn2C1OC(COP([O-])(O)OP([O-])(O)CP([O-])(O)O)C(O)C1O	1u54-ACP	Q07912
Nc1ncnc2c1ncn2C1OC(COP([O-])(O)OP([O-])(O)CP([O-])(O)O)C(O)C1O	2pkn-ACP	P83734
Nc1ncnc2c1ncn2C1OC(COP([O-])(O)OP([O-])(O)CP([O-])(O)O)C(O)C1O	2z7q-ABG	Q15418
Nc1ncnc2c1ncn2C1OC(COP(=O)(O)OP(=O)(O)CP(=O)(O)O)C(O)C1O	2zja-ACP	O73946
Nc1ncnc2c1ncn2C1OC(COP(O)(O)OP([O-])(O)CP([O-])([O-])O)C(O)C1O	3a1c-ACP	O29777
Nc1ncnc2c1ncn2C1OC(COP(O)(O)OP([O-])(O)CP([O-])([O-])O)C(O)C1O	3gqi-ACP	P11362
Nc1ncnc2c1ncn2C1OC(COP(O)(O)OP([O-])(O)CP([O-])([O-])O)C(O)C1O	3jvv-ACP	P24559
Nc1ncnc2c1ncn2C1OC(COP([O-])(O)OP([O-])(O)[NH2+]P([O-])(O)O)C(O)C1O	1esn-ANP	P0A6I3
Nc1ncnc2c1ncn2C1OC(COP([O-])(O)OP([O-])(O)[NH2+]P([O-])(O)O)C(O)C1O	1ia9-ANP	Q923J1
Nc1ncnc2c1ncn2C1OC(COP([O-])(O)OP([O-])(O)[NH2+]P([O-])(O)O)C(O)C1O	1id0-ANP	P23837
Nc1ncnc2c1ncn2C1OC(COP([O-])(O)OP([O-])(O)[NH2+]P([O-])(O)O)C(O)C1O	1iy0-ANP	Q5SI82
Nc1ncnc2c1ncn2C1OC(COP([O-])(O)OP([O-])(O)[NH2+]P([O-])(O)O)C(O)C1O	1j1b-ANP	P49841
Nc1ncnc2c1ncn2C1OC(COP([O-])(O)OP([O-])(O)[NH2+]P([O-])(O)O)C(O)C1O	1jnk-ANP	P53779
Nc1ncnc2c1ncn2C1OC(COP([O-])(O)OP([O-])(O)[NH2+]P([O-])(O)O)C(O)C1O	1jqh-ANP	P08069
Nc1ncnc2c1ncn2C1OC(COP([O-])(O)OP([O-])(O)[NH2+]P([O-])(O)O)C(O)C1O	1m0w-ANP	Q08220
Nc1ncnc2c1ncn2C1OC(COP([O-])(O)OP([O-])(O)[NH2+]P([O-])(O)O)C(O)C1O	1x3n-ANP	O06961
Nc1ncnc2c1ncn2C1OC(COP([O-])(O)OP([O-])(O)[NH2+]P([O-])(O)O)C(O)C1O	1xr1-ANP	P11309
Nc1ncnc2c1ncn2C1OC(COP([O-])(O)OP([O-])(O)[NH2+]P([O-])(O)O)C(O)C1O	1zy5-ANP	P15442
Nc1ncnc2c1ncn2C1OC(COP([O-])(O)OP([O-])(O)[NH2+]P([O-])(O)O)C(O)C1O	2a19-ANP	P20459
Nc1ncnc2c1ncn2C1OC(COP([O-])(O)OP([O-])(O)[NH2+]P([O-])(O)O)C(O)C1O	2dwb-ANP	O14965
Nc1ncnc2c1ncn2C1OC(COP([O-])(O)OP([O-])(O)[NH2+]P([O-])(O)O)C(O)C1O	2e21-ANP	O67728
Nc1ncnc2c1ncn2C1OC(COP([O-])(O)OP([O-])(O)[NH2+]P([O-])(O)O)C(O)C1O	2gjk-ANP	Q92900
Nc1ncnc2c1ncn2C1OC(COP([O-])(O)OP([O-])(O)[NH2+]P([O-])(O)O)C(O)C1O	2itx-ANP	P00533
Nc1ncnc2c1ncn2C1OC(COP([O-])(O)OP([O-])(O)[NH2+]P([O-])(O)O)C(O)C1O	2j0l-ANP	Q00944
Nc1ncnc2c1ncn2C1OC(COP([O-])(O)OP([O-])(O)[NH2+]P([O-])(O)O)C(O)C1O	2ou7-ANP	P53350
Nc1ncnc2c1ncn2C1OC(COP([O-])(O)OP([O-])(O)[NH2+]P([O-])(O)O)C(O)C1O	2ozo-ANP	P43403
Nc1ncnc2c1ncn2C1OC(COP([O-])(O)OP([O-])(O)[NH2+]P([O-])(O)O)C(O)C1O	2pvr-ANP	P68400
Nc1ncnc2c1ncn2C1OC(COP([O-])(O)OP([O-])(O)[NH2+]P([O-])(O)O)C(O)C1O	2vug-ANP	Q9UYG2
Nc1ncnc2c1ncn2C1OC(COP([O-])(O)OP([O-])(O)[NH2+]P([O-])(O)O)C(O)C1O	2vwi-ANP	O95747
Nc1ncnc2c1ncn2C1OC(COP([O-])(O)OP([O-])(O)NP)C(O)C1O	3ku2-ANP	Q9BJF5
Nc1ncnc2c1ncn2C1OC(COP(=O)(O)OP(=O)(O)NP(=O)(O)O)C(O)C1O	2hw1-ANP	P50053
Nc1ncnc2c1ncn2C1OC(COP(=O)(O)OP(=O)(O)NP(=O)(O)O)C(O)C1O	2zv8-ANP	P25911
Nc1ncnc2c1ncn2C1OC(COP(O)(O)OP([O-])(O)NP([O-])([O-])O)C(O)C1O	3a99-ANP	P11309
Nc1ncnc2c1ncn2C1OC(COP(O)(O)OP([O-])(O)NP([O-])([O-])O)C(O)C1O	3aln-ANP	P45985
Nc1ncnc2c1ncn2C1OC(COP(O)(O)OP([O-])(O)NP([O-])([O-])O)C(O)C1O	3fws-ANP	O34994
Nc1ncnc2c1ncn2C1OC(COP(O)(O)OP([O-])(O)NP([O-])([O-])O)C(O)C1O	3gt8-ANP	P00533
Nc1ncnc2c1ncn2C1OC(COP(O)(O)OP([O-])(O)NP([O-])([O-])O)C(O)C1O	3h4l-ANP	P14242
Nc1ncnc2c1ncn2C1OC(COP(O)(O)OP([O-])(O)NP([O-])([O-])O)C(O)C1O	3hx4-ANP	Q9BJF5
Nc1ncnc2c1ncn2C1OC(COP(O)(O)OP([O-])(O)NP([O-])([O-])O)C(O)C1O	3igo-ANP	A3FQ16
Nc1ncnc2c1ncn2C1OC(COP(O)(O)OP([O-])(O)NP([O-])([O-])O)C(O)C1O	3kn5-ANP	O75582
Nc1ncnc2c1ncn2C1OC(COP(O)(O)OP([O-])(O)NP([O-])([O-])O)C(O)C1O	3lij-ANP	Q5CS01
Nc1ncnc2c1ncn2C1OC(COP(O)(O)OP([O-])(O)NP([O-])([O-])O)C(O)C1O	3lmg-ANP	P21860
Nc1ncnc2c1ncn2C1OC(COP(O)(O)OP([O-])(O)NP([O-])([O-])O)C(O)C1O	3mia-ANP	P50750
Nc1ncnc2c1ncn2C1OC(COP(O)(O)OP([O-])(O)NP([O-])([O-])O)C(O)C1O	3pls-ANP	Q04912
Nc1ncnc2c1ncn2C1OC(COP(O)(O)OP([O-])(O)NP([O-])([O-])O)C(O)C1O	3q5i-ANP	Q4YRR5
Nc1ncnc2c1ncn2C1OC(COP([O-])(O)OP([O-])(O)OC2OC(CO)C(O)C(O)C2O)C(O)C1O	2h39-ADQ	Q9FK51
Nc1ncnc2c1ncn2C1OC(COP([O-])(O)OP([O-])(O)OCC2OCC(O)C2O)C(O)C1OP([O-])(O)O	2wzm-NA7	A0QV09
Nc1ncnc2c1ncn2C1OC(COP([O-])(O)OP([O-])(O)OCC2OC([n+]3cccc(C(=O)[O-])c3)C(O)C2O)C(O)C1O	1xng-DND	O25096
Nc1ncnc2c1ncn2C1OC(COP([O-])(O)OP([O-])(O)OCC2OC(O)C(O)C2O)C(O)C1O	1u2g-APR	Q2RSB2
Nc1ncnc2c1ncn2C1OC(COP([O-])(O)OP([O-])(O)OCC2OC(O)C(O)C2O)C(O)C1O	2gr2-APR	Q52437
Nc1ncnc2c1ncn2C1OC(COP([O-])(O)OP([O-])(O)OCC2OC(O)C(O)C2O)C(O)C1O	3gpo-APR	Q8JUX6
Nc1ncnc2c1ncn2C1OC(COP([O-])(O)OP([O-])(O)OCC2OC(O)C(O)C2O)C(O)C1O	3gqo-APR	P36328
Nc1ncnc2c1ncn2C1OC(COP([O-])(O)OP([O-])(O)OCC2OC(O)C(O)C2O)C(O)C1O	3kh6-APR	Q460N3
Nc1ncnc2c1ncn2C1OC(COP([O-])(O)OP([O-])(O)OCC2OC(O)C(O)C2O)C(O)C1O	3q71-AR6	Q460N5
Nc1ncnc2c1ncn2C1OC(COP([O-])(O)OP([O-])(O)OCC2OC(O)C(O)C2O)C(O)C1OP([O-])(O)O	1yon-APX	P0A9J4
Nc1ncnc2c1ncn2C1OC(COP([O-])(O)OP([O-])(O)O)C(O)C1O	1amw-ADP	P02829
Nc1ncnc2c1ncn2C1OC(=COP(O)(O)OP([O-])([O-])O)C(O)C1O	1bs1-ADP	P13000
Nc1ncnc2c1ncn2C1OC(COP([O-])(O)OP([O-])(O)O)C(O)C1O	1djn-ADP	P16099
Nc1ncnc2c1ncn2C1OC(COP([O-])(O)OP([O-])(O)O)C(O)C1O	1eqm-ADP	P26281
Nc1ncnc2c1ncn2C1OC(COP([O-])(O)OP([O-])(O)O)C(O)C1O	1f3o-ADP	Q58206
Nc1ncnc2c1ncn2C1OC(COP([O-])(O)OP([O-])(O)O)C(O)C1O	1f9v-ADP	P17119
Nc1ncnc2c1ncn2C1OC(COP([O-])(O)OP([O-])(O)O)C(O)C1O	1fwk-ADP	Q58504
Nc1ncnc2c1ncn2C1OC(COP([O-])(O)OP([O-])(O)O)C(O)C1O	1g6h-ADP	Q58663
Nc1ncnc2c1ncn2C1OC(COP([O-])(O)OP([O-])(O)O)C(O)C1O	1g99-ADP	P38502
Nc1ncnc2c1ncn2C1OC(COP([O-])(O)OP([O-])(O)O)C(O)C1O	1gc5-ADP	Q7M537
Nc1ncnc2c1ncn2C1OC(COP([O-])(O)OP([O-])(O)O)C(O)C1O	1goj-ADP	P48467
Nc1ncnc2c1ncn2C1OC(COP([O-])(O)OP([O-])(O)O)C(O)C1O	1hux-ADP	P11568
Nc1ncnc2c1ncn2C1OC(COP([O-])(O)OP([O-])(O)O)C(O)C1O	1iah-ADP	Q923J1
Nc1ncnc2c1ncn2C1OC(COP([O-])(O)OP([O-])(O)O)C(O)C1O	1ihu-ADP	P08690
Nc1ncnc2c1ncn2C1OC(COP([O-])(O)OP([O-])(O)O)C(O)C1O	1ii6-ADP	P52732
Nc1ncnc2c1ncn2C1OC(COP([O-])(O)OP([O-])(O)O)C(O)C1O	1j1c-ADP	P49841
Nc1ncnc2c1ncn2C1OC(COP([O-])(O)OP([O-])(O)O)C(O)C1O	1jj7-ADP	Q03518
Nc1ncnc2c1ncn2C1OC(COP([O-])(O)OP([O-])(O)O)C(O)C1O	1n08-ADP	O74866
Nc1ncnc2c1ncn2C1OC(COP([O-])(O)OP([O-])(O)O)C(O)C1O	1ny5-ADP	O67198
Nc1ncnc2c1ncn2C1OC(COP([O-])(O)OP([O-])(O)O)C(O)C1O	1o51-ADP	Q9WXM9
Nc1ncnc2c1ncn2C1OC(COP([O-])(O)OP([O-])(O)O)C(O)C1O	1pkg-ADP	P10721
Nc1ncnc2c1ncn2C1OC(COP([O-])(O)OP([O-])(O)O)C(O)C1O	1s3s-ADP	Q01853
Nc1ncnc2c1ncn2C1OC(COP([O-])(O)OP([O-])(O)O)C(O)C1O	1t6x-ADP	Q9WZW1
Nc1ncnc2c1ncn2C1OC(COP([O-])(O)OP([O-])(O)O)C(O)C1O	1tuy-ADP	P38502
Nc1ncnc2c1ncn2C1OC(COP([O-])(O)OP([O-])(O)O)C(O)C1O	1ty8-ADP	Q04299
Nc1ncnc2c1ncn2C1OC(COP([O-])(O)OP([O-])(O)O)C(O)C1O	1tzd-ADP	P17105
Nc1ncnc2c1ncn2C1OC(COP([O-])(O)OP([O-])(O)O)C(O)C1O	1u0j-ADP	P03132
Nc1ncnc2c1ncn2C1OC(COP([O-])(O)OP([O-])(O)O)C(O)C1O	1um8-ADP	O25926
Nc1ncnc2c1ncn2C1OC(COP(=O)(O)OP(=O)(O)O)C(O)C1O	1v1a-ADP	Q53W83
Nc1ncnc2c1ncn2C1OC(COP(=O)(O)OP(=O)(O)O)C(O)C1O	1w2d-ADP	P23677
Nc1ncnc2c1ncn2C1OC(COP([O-])(O)OP([O-])(O)O)C(O)C1O	1w44-ADP	Q94M05
Nc1ncnc2c1ncn2C1OC(COP([O-])(O)OP([O-])(O)O)C(O)C1O	1wnl-ADP	O57883
Nc1ncnc2c1ncn2C1OC(COP([O-])(O)OP([O-])(O)O)C(O)C1O	1x3m-ADP	O06961
Nc1ncnc2c1ncn2C1OC(COP([O-])(O)OP([O-])(O)O)C(O)C1O	1x6v-ADP	O43252
Nc1ncnc2c1ncn2C1OC(COP([O-])(O)OP([O-])(O)O)C(O)C1O	1xw4-ADP	Q9BYN0
Nc1ncnc2c1ncn2C1OC(COP([O-])(O)OP([O-])(O)O)C(O)C1O	1xx6-ADP	Q97F65
Nc1ncnc2c1ncn2C1OC(COP([O-])(O)OP([O-])(O)O)C(O)C1O	1y63-ADP	Q4Q7A6
Nc1ncnc2c1ncn2C1OC(COP([O-])(O)OP([O-])(O)O)C(O)C1O	2bfr-ADP	O28751
Nc1ncnc2c1ncn2C1OC(COP([O-])(O)OP([O-])(O)O)C(O)C1O	2bkk-ADP	P0A3Y5
Nc1ncnc2c1ncn2C1OC(COP([O-])(O)OP([O-])(O)O)C(O)C1O	2bu8-ADP	Q15119
Nc1ncnc2c1ncn2C1OC(COP([O-])(O)OP([O-])(O)O)C(O)C1O	2ce7-ADP	Q9WZ49
Nc1ncnc2c1ncn2C1OC(COP(=O)(O)OP(=O)(O)O)C(O)C1O	2ch6-ADP	Q9UJ70
Nc1ncnc2c1ncn2C1OC(COP([O-])(O)OP([O-])(O)O)C(O)C1O	2d2f-ADP	Q5SH92
Nc1ncnc2c1ncn2C1OC(COP([O-])(O)OP([O-])(O)O)C(O)C1O	2dpy-ADP	P26465
Nc1ncnc2c1ncn2C1OC(COP([O-])(O)OP([O-])(O)O)C(O)C1O	2fv7-ADP	Q9H477
Nc1ncnc2c1ncn2C1OC(COP([O-])(O)OP([O-])(O)O)C(O)C1O	2h1f-ADP	Q8FC98
Nc1ncnc2c1ncn2C1OC(COP([O-])(O)OP([O-])(O)O)C(O)C1O	2hv7-ADP	Q15257
Nc1ncnc2c1ncn2C1OC(COP([O-])(O)OP([O-])(O)O)C(O)C1O	2if8-ADP	P07250
Nc1ncnc2c1ncn2C1OC(COP(=O)(O)OP(=O)(O)O)C(O)C1O	2jls-ADP	Q2YHF0
Nc1ncnc2c1ncn2C1OC(COP([O-])(O)OP([O-])(O)O)C(O)C1O	2kin-ADP	P56536
Nc1ncnc2c1ncn2C1OC(COP([O-])(O)OP([O-])(O)O)C(O)C1O	2pyw-ADP	Q9C6D2
Nc1ncnc2c1ncn2C1OC(COP([O-])(O)OP([O-])(O)O)C(O)C1O	2qrd-ADP	O74536
Nc1ncnc2c1ncn2C1OC(COP([O-])(O)OP([O-])(O)O)C(O)C1O	2qv7-ADP	Q6GFF9
Nc1ncnc2c1ncn2C1OC(COP([O-])(O)OP([O-])(O)O)C(O)C1O	2r87-ADP	Q8U0R7
Nc1ncnc2c1ncn2C1OC(COP(=O)(O)OP(=O)(O)O)C(O)C1O	2vf7-ADP	Q9RYW8
Nc1ncnc2c1ncn2C1OC(COP([O-])(O)OP([O-])(O)O)C(O)C1O	2vhj-ADP	Q94M05
Nc1ncnc2c1ncn2C1OC(COP(=O)(O)OP(=O)(O)O)C(O)C1O	2vt2-NAD	O05521
Nc1ncnc2c1ncn2C1OC(COP([O-])(O)OP([O-])(O)O)C(O)C1O	2vvg-ADP	A8BKD1
Nc1ncnc2c1ncn2C1OC(COP(=O)(O)OP(=O)(O)O)C(O)C1O	2w41-ADP	Q8IDI4
Nc1ncnc2c1ncn2C1OC(COP(=O)(O)OP(=O)(O)O)C(O)C1O	2w8r-ADP	P51649
Nc1ncnc2c1ncn2C1OC(COP(=O)(O)OP(=O)(O)O)C(O)C1O	2wep-ADP	P02829
Nc1ncnc2c1ncn2C1OC(COP(O)(O)OP([O-])([O-])O)C(O)C1O	2wqn-ADP	Q8TDX7
Nc1ncnc2c1ncn2C1OC(COP(O)(O)OP([O-])([O-])O)C(O)C1O	2ww4-ADP	P62615
Nc1ncnc2c1ncn2C1OC(COP(O)(O)OP([O-])([O-])O)C(O)C1O	2xoc-ADP	Q96EP1
Nc1ncnc2c1ncn2C1OC(COP(O)(O)OP([O-])([O-])O)C(O)C1O	2xzl-ADP	P30771
Nc1ncnc2c1ncn2C1OC(COP(O)(O)OP([O-])([O-])O)C(O)C1O	2xzo-ADP	Q92900
Nc1ncnc2c1ncn2C1OC(COP(=O)(O)OP(=O)(O)O)C(O)C1O	2zj5-ADP	O73946
Nc1ncnc2c1ncn2C1OC(COP(=O)(O)OP(=O)(O)O)C(O)C1O	2zpa-ADP	P76562
Nc1ncnc2c1ncn2C1OC(COP([O-])(O)OP([O-])(O)O)C(O)C1O	2ztw-NAD	Q5SIY4
Nc1ncnc2c1ncn2C1OC(COP(O)(O)OP([O-])([O-])O)C(O)C1O	3a7j-ADP	Q9Y6E0
Nc1ncnc2c1ncn2C1OC(COP(=O)(O)OP(=O)(O)O)C(O)C1O	3bf1-ADP	Q9WZY5
Nc1ncnc2c1ncn2C1OC(COP([O-])(O)OP([O-])(O)O)C(O)C1O	3bfn-ADP	Q14807
Nc1ncnc2c1ncn2C1OC(COP([O-])(O)OP([O-])(O)O)C(O)C1O	3bfv-ADP	A8YPQ6
Nc1ncnc2c1ncn2C1OC(COP([O-])(O)OP([O-])(O)O)C(O)C1O	3brb-ADP	Q12866
Nc1ncnc2c1ncn2C1OC(COP(=O)(O)OP(=O)(O)O)C(O)C1O	3c3a-ADP	P00558
Nc1ncnc2c1ncn2C1OC(COP([O-])(O)OP([O-])(O)O)C(O)C1O	3cwq-ADP	Q6YRW8
Nc1ncnc2c1ncn2C1OC(COP(=O)(O)OP(=O)(O)O)C(O)C1O	3dkp-ADP	Q9Y2R4
Nc1ncnc2c1ncn2C1OC(COP(=O)(O)OP(=O)(O)O)C(O)C1O	3dls-ADP	Q96RG2
Nc1ncnc2c1ncn2C1OC(COP(=O)(O)OP(=O)(O)O)C(O)C1O	3eqi-ADP	Q02750
Nc1ncnc2c1ncn2C1OC(COP(=O)(O)OP(=O)(O)O)C(O)C1O	3ews-ADP	Q9UMR2
Nc1ncnc2c1ncn2C1OC(COP(=O)(O)OP(=O)(O)O)C(O)C1O	3fe2-ADP	P17844
Nc1ncnc2c1ncn2C1OC(COP(=O)(O)OP(=O)(O)O)C(O)C1O	3fh0-ADP	A6T8F5
Nc1ncnc2c1ncn2C1OC(COP(=O)(O)OP(=O)(O)O)C(O)C1O	3fi8-ADP	Q8IM71
Nc1ncnc2c1ncn2C1OC(COP([O-])(O)OP([O-])(O)O)C(O)C1O	3gx9-TXD	Q51990
Nc1ncnc2c1ncn2C1OC(COP(O)(O)OP([O-])([O-])O)C(O)C1O	3ice-ADP	P0AG30
Nc1ncnc2c1ncn2C1OC(COP(O)(O)OP([O-])([O-])O)C(O)C1O	3ihl-ADP	Q9NRF8
Nc1ncnc2c1ncn2C1OC(COP(O)(O)OP([O-])([O-])O)C(O)C1O	3iij-ADP	Q9Y3D8
Nc1ncnc2c1ncn2C1OC(COP(O)(O)OP([O-])([O-])O)C(O)C1O	3io3-ADP	Q6BSM0
Nc1ncnc2c1ncn2C1OC(COP(O)(O)OP([O-])([O-])O)C(O)C1O	3iuc-ADP	P11021
Nc1ncnc2c1ncn2C1OC(COP(O)(O)OP([O-])([O-])O)C(O)C1O	3kb1-ADP	O28015
Nc1ncnc2c1ncn2C1OC(COP(O)(O)OP([O-])([O-])O)C(O)C1O	3kh5-ADP	Q58622
Nc1ncnc2c1ncn2C1OC(COP(O)(O)OP([O-])([O-])O)C(O)C1O	3kji-ADP	Q3ACS5
Nc1ncnc2c1ncn2C1OC(COP(O)(O)OP([O-])([O-])O)C(O)C1O	3ko5-ADP	Q8IIS0
Nc1ncnc2c1ncn2C1OC(COP(O)(O)OP([O-])([O-])O)C(O)C1O	3kzb-ADP	Q7NWW7
Nc1ncnc2c1ncn2C1OC(COP(O)(O)OP([O-])([O-])O)C(O)C1O	3lct-ADP	Q9UM73
Nc1ncnc2c1ncn2C1OC(COP(O)(O)OP([O-])([O-])O)C(O)C1O	3llm-ADP	Q08211
Nc1ncnc2c1ncn2C1OC(COP(O)(O)OP([O-])([O-])O)C(O)C1O	3lre-ADP	Q8NI77
Nc1ncnc2c1ncn2C1OC(COP(O)(O)OP([O-])([O-])O)C(O)C1O	3nbx-ADP	P31473
Nc1ncnc2c1ncn2C1OC(COP(O)(O)OP([O-])([O-])O)C(O)C1O	3nha-ADP	Q9NP58
Nc1ncnc2c1ncn2C1OC(COP(O)(O)OP([O-])([O-])O)C(O)C1O	3nwn-ADP	Q9HAQ2
Nc1ncnc2c1ncn2C1OC(COP(O)(O)OP([O-])([O-])O)C(O)C1O	3ohr-ADP	O05510
Nc1ncnc2c1ncn2C1OC(COP(O)(O)OP([O-])([O-])O)C(O)C1O	3ozx-ADP	Q980K5
Nc1ncnc2c1ncn2C1OC(COP(O)(O)OP([O-])([O-])O)C(O)C1O	3p23-ADP	O75460
Nc1ncnc2c1ncn2C1OC(COP(O)(O)OP([O-])([O-])O)C(O)C1O	3qbw-ADP	Q9I5Q5
Nc1ncnc2c1ncn2C1OC(COP(O)(O)OP([O-])([O-])O)C(O)C1O	3qc9-ADP	P28327
Nc1ncnc2c1ncn2C1OC(COP(O)(O)OP([O-])([O-])O)C(O)C1O	3r70-ADP	Q93ET9
Nc1ncnc2c1ncn2C1OC(COP([O-])(O)OP([O-])(O)O)C(O)C1O	3rfx-NAD	Q7CRQ0
Nc1ncnc2c1ncn2C1OC(COP([O-])(O)OP([O-])([O-])O)C(O)C1OP([O-])(O)O	2hk9-ATR	O67049
Nc1ncnc2c1ncn2C1OC(COP(O)(O)OP([O-])(O)O)C(O)C1OP([O-])([O-])O	2wme-NAP	Q9HTJ1
Nc1ncnc2c1ncn2C1OC(COP(O)(O)OP([O-])(O)O)C(O)C1OP([O-])([O-])O	3mbc-NAP	P50216
Nc1ncnc2c1ncn2C1OC(COP(O)(O)OP([O-])(O)O)C(O)C1OP([O-])([O-])O	3rhd-NAP	Q58806
Nc1ncnc2c1ncn2C1OC(COP(O)(O)OP([O-])(O)O)C(O)C1OP([O-])([O-])O	3rhh-NAP	Q9KAQ0
Nc1ncnc2c1ncn2C1OC(COP(=O)(O)OP(=O)(O)O)C(OP(=O)(O)O)C1O	3cv2-COA	P08997
Nc1ncnc2c1ncn2C1OC(COP([O-])(O)OP([O-])(O)O)C(OP([O-])(O)O)C1O	3fsy-SCA	O05302
Nc1ncnc2c1ncn2C1OC(COP([O-])(O)OP([O-])(O)OP([O-])(O)O)C(O)C1O	1csn-ATP	P40233
Nc1ncnc2c1ncn2C1OC(COP([O-])(O)OP([O-])(O)OP([O-])(O)O)C(O)C1O	1dv2-ATP	P24182
Nc1ncnc2c1ncn2C1OC(COP([O-])(O)OP([O-])(O)OP([O-])(O)O)C(O)C1O	1e8x-ATP	O02697
Nc1ncnc2c1ncn2C1OC(COP([O-])(O)OP([O-])(O)OP([O-])(O)O)C(O)C1O	1h1w-ATP	O15530
Nc1ncnc2c1ncn2C1OC(COP([O-])(O)OP([O-])(O)OP([O-])(O)O)C(O)C1O	1hp1-ATP	P07024
Nc1ncnc2c1ncn2C1OC(COP([O-])(O)OP([O-])(O)OP([O-])(O)O)C(O)C1O	1kp2-ATP	P0A6E4
Nc1ncnc2c1ncn2C1OC(COP([O-])(O)OP([O-])(O)OP([O-])(O)O)C(O)C1O	1kvk-ATP	P17256
Nc1ncnc2c1ncn2C1OC(COP([O-])(O)OP([O-])(O)OP([O-])(O)O)C(O)C1O	1m83-ATP	P00953
Nc1ncnc2c1ncn2C1OC(COP([O-])(O)OP([O-])(O)OP([O-])(O)O)C(O)C1O	1mab-ATP	P15999
Nc1ncnc2c1ncn2C1OC(COP([O-])(O)OP([O-])(O)OP([O-])(O)O)C(O)C1O	1miw-ATP	Q7SIB1
Nc1ncnc2c1ncn2C1OC(COP([O-])(O)OP([O-])(O)OP([O-])(O)O)C(O)C1O	1n75-ATP	P27000
Nc1ncnc2c1ncn2C1OC(COP([O-])(O)OP([O-])(O)OP([O-])(O)O)C(O)C1O	1ol6-ATP	O14965
Nc1ncnc2c1ncn2C1OC(COP([O-])(O)OP([O-])(O)OP([O-])(O)O)C(O)C1O	1q12-ATP	P68187
Nc1ncnc2c1ncn2C1OC(COP([O-])(O)OP([O-])(O)OP([O-])(O)O)C(O)C1O	1qhx-ATP	Q56148
Nc1ncnc2c1ncn2C1OC(COP([O-])(O)OP([O-])(O)OP([O-])(O)O)C(O)C1O	1sx3-ATP	P0A6F5
Nc1ncnc2c1ncn2C1OC(COP([O-])(O)OP([O-])(O)OP([O-])(O)O)C(O)C1O	1xdn-ATP	P86927
Nc1ncnc2c1ncn2C1OC(COP([O-])(O)OP([O-])(O)OP([O-])(O)O)C(O)C1O	1xex-ATP	Q8TZY2
Nc1ncnc2c1ncn2C1OC(COP([O-])(O)OP([O-])(O)OP([O-])(O)O)C(O)C1O	1z0s-ATP	O30297
Nc1ncnc2c1ncn2C1OC(COP([O-])(O)OP([O-])(O)OP([O-])(O)O)C(O)C1O	1zyd-ATP	P15442
Nc1ncnc2c1ncn2C1OC(COP([O-])(O)OP([O-])(O)OP([O-])(O)O)C(O)C1O	2cch-ATP	P24941
Nc1ncnc2c1ncn2C1OC(COP([O-])(O)OP([O-])(O)OP([O-])(O)O)C(O)C1O	2e89-ATP	O67728
Nc1ncnc2c1ncn2C1OC(COP([O-])(O)OP([O-])(O)OP([O-])(O)O)C(O)C1O	2f02-ATP	Q833W9
Nc1ncnc2c1ncn2C1OC(COP([O-])(O)OP([O-])(O)OP([O-])(O)O)C(O)C1O	2fgh-ATP	Q28372
Nc1ncnc2c1ncn2C1OC(COP([O-])(O)OP([O-])(O)OP([O-])(O)O)C(O)C1O	2iaj-ATP	P03366
Nc1ncnc2c1ncn2C1OC(COP([O-])(O)OP([O-])(O)OP([O-])(O)O)C(O)C1O	2ijm-ATP	Q05397
Nc1ncnc2c1ncn2C1OC(COP(=O)(O)OP(=O)(O)OP(=O)(O)O)C(O)C1O	2jjx-ATP	Q81S73
Nc1ncnc2c1ncn2C1OC(COP([O-])(O)OP([O-])(O)OP([O-])(O)O)C(O)C1O	2nvu-ATP	Q13564
Nc1ncnc2c1ncn2C1OC(COP([O-])(O)OP([O-])(O)OP([O-])(O)O)C(O)C1O	2pnn-ATP	O35433
Nc1ncnc2c1ncn2C1OC(COP([O-])(O)OP([O-])(O)OP([O-])(O)O)C(O)C1O	2q66-ATP	P29468
Nc1ncnc2c1ncn2C1OC(COP([O-])(O)OP([O-])(O)OP([O-])(O)O)C(O)C1O	2qk4-ATP	P22102
[truncated: 1,064 more rows]
